# Supplementary material for: Development of a targeted BioPROTAC degrader selective for misfolded SOD1
Source: Research Square preprint supplement (doi:10.21203/rs.3.rs-6070925/v1), 2025-03-09

## Reporting Summary

Nature Portfolio wishes to improve the reproducibility of the work that we publish. This form provides structure for consistency and transparency in reporting. For further information on Nature Portfolio policies, see our [Editorial Policies](#) and the [Editorial Policy Checklist](#).

Please do not complete any field with "not applicable" or n/a. Refer to the help text for what text to use if an item is not relevant to your study.

For final submission: please carefully check your responses for accuracy; you will not be able to make changes later.

### Statistics

For all statistical analyses, confirm that the following items are present in the figure legend, table legend, main text, or Methods section.

n/a Confirmed

- ☐ ☒ The exact sample size ( $n$ ) for each experimental group/condition, given as a discrete number and unit of measurement
- ☐ ☒ A statement on whether measurements were taken from distinct samples or whether the same sample was measured repeatedly
- ☐ ☒ The statistical test(s) used AND whether they are one- or two-sided  
*Only common tests should be described solely by name; describe more complex techniques in the Methods section.*
- ☐ ☒ A description of all covariates tested
- ☐ ☒ A description of any assumptions or corrections, such as tests of normality and adjustment for multiple comparisons
- ☐ ☒ A full description of the statistical parameters including central tendency (e.g. means) or other basic estimates (e.g. regression coefficient) AND variation (e.g. standard deviation) or associated estimates of uncertainty (e.g. confidence intervals)
- ☐ ☒ For null hypothesis testing, the test statistic (e.g.  $F$ ,  $t$ ,  $r$ ) with confidence intervals, effect sizes, degrees of freedom and  $P$  value noted  
*Give  $P$  values as exact values whenever suitable.*
- ☒ ☐ For Bayesian analysis, information on the choice of priors and Markov chain Monte Carlo settings
- ☒ ☐ For hierarchical and complex designs, identification of the appropriate level for tests and full reporting of outcomes
- ☒ ☐ Estimates of effect sizes (e.g. Cohen's  $d$ , Pearson's  $r$ ), indicating how they were calculated

*Our web collection on [statistics for biologists](#) contains articles on many of the points above.*

### Software and code

Policy information about [availability of computer code](#)

#### Data collection

Leica Application Suite - Advanced Fluorescence (LAS-AF) software (Version 3, Leica Microsystems)  
Thunder automated microscope (Leica Microsystems)  
IncuCyte® ZOOM automated fluorescent microscope (Sartorius, Göttingen, Germany)  
POLARstar Omega plate reader (BMG Labtech, Ortenberg, Germany)  
Amersham Imager 600RGB, GE Healthcare  
5-lane accelerating rotarod (RotaRod Advanced, TSE Systems, Hesse, Germany)  
Leica DM750  
DMI8 microscope (Leica Microsystems)

#### Data analysis

CellProfiler (Version 4.2.4 for Windows, Broad Institute, Cambridge, Massachusetts)  
IncuCyte® ZOOM software (Sartorius, Göttingen, Germany)  
POLARstar Omega software (BMG Labtech, Ortenberg, Germany)  
ImageJ (Version 1.53c for Windows, National Institutes of Health, Bethesda, MD)  
Leica DM750  
DMI8 microscope (Leica Microsystems)  
GraphPad Prism software (Version 10.0 for Windows, Boston, MA)

For manuscripts utilizing custom algorithms or software that are central to the research but not yet described in published literature, software must be made available to editors and reviewers. We strongly encourage code deposition in a community repository (e.g. GitHub). See the Nature Portfolio [guidelines for submitting code & software](#) for further information.

### Data

Policy information about [availability of data](#)

All manuscripts must include a [data availability statement](#). This statement should provide the following information, where applicable:

- Accession codes, unique identifiers, or web links for publicly available datasets
- A description of any restrictions on data availability
- For clinical datasets or third party data, please ensure that the statement adheres to our [policy](#)

The authors declare that all data supporting the findings of this study are available within the paper, its supplementary information and source files.

## Research involving human participants, their data, or biological material

Policy information about studies with [human participants or human data](#). See also policy information about [sex, gender \(identity/presentation\), and sexual orientation](#) and [race, ethnicity and racism](#).

Reporting on sex and gender

Reporting on race, ethnicity, or other socially relevant groupings

Population characteristics

Recruitment

Ethics oversight

Note that full information on the approval of the study protocol must also be provided in the manuscript.

## Field-specific reporting

Please select the one below that is the best fit for your research. If you are not sure, read the appropriate sections before making your selection.

☒ Life sciences

☐ Behavioural & social sciences

☐ Ecological, evolutionary & environmental sciences

For a reference copy of the document with all sections, see [nature.com/documents/nr-reporting-summary-flat.pdf](https://www.nature.com/documents/nr-reporting-summary-flat.pdf)

## Life sciences study design

All studies must disclose on these points even when the disclosure is negative.

Sample size

Sample sizes for in vitro studies, biological replicates (provided in the figure legends) were determined based on historical data obtained by the group and what is generally accepted and published by the field. For in vivo studies, group sizes were determined based on recommendations from recommendations of the ALS Therapy Development Institute.

Data exclusions

No data was excluded

Replication

All experiments were repeated at least 2-3 times and are indicated in the methods or figure legends.

Randomization

Experimental groups are identical except for the specific variable being tested and therefore randomization was not required.

Blinding

In vivo studies were performed by observers blinded to treatment

## Behavioural & social sciences study design

All studies must disclose on these points even when the disclosure is negative.

Study description

Research sample

Sampling strategy

Data collection

Timing

Data exclusions

Non-participation

Randomization

# Ecological, evolutionary & environmental sciences study design

All studies must disclose on these points even when the disclosure is negative.

|                          |                      |
|--------------------------|----------------------|
| Study description        | <input type="text"/> |
| Research sample          | <input type="text"/> |
| Sampling strategy        | <input type="text"/> |
| Data collection          | <input type="text"/> |
| Timing and spatial scale | <input type="text"/> |
| Data exclusions          | <input type="text"/> |
| Reproducibility          | <input type="text"/> |
| Randomization            | <input type="text"/> |
| Blinding                 | <input type="text"/> |

Did the study involve field work? ☐ Yes ☐ No

## Field work, collection and transport

|                        |                      |
|------------------------|----------------------|
| Field conditions       | <input type="text"/> |
| Location               | <input type="text"/> |
| Access & import/export | <input type="text"/> |
| Disturbance            | <input type="text"/> |

## Reporting for specific materials, systems and methods

We require information from authors about some types of materials, experimental systems and methods used in many studies. Here, indicate whether each material, system or method listed is relevant to your study. If you are not sure if a list item applies to your research, read the appropriate section before selecting a response.

### Materials & experimental systems

| n/a                                 | Involved in the study                                           |
|-------------------------------------|-----------------------------------------------------------------|
| <input type="checkbox"/>            | <input checked="" type="checkbox"/> Antibodies                  |
| <input type="checkbox"/>            | <input checked="" type="checkbox"/> Eukaryotic cell lines       |
| <input checked="" type="checkbox"/> | <input type="checkbox"/> Palaeontology and archaeology          |
| <input type="checkbox"/>            | <input checked="" type="checkbox"/> Animals and other organisms |
| <input checked="" type="checkbox"/> | <input type="checkbox"/> Clinical data                          |
| <input checked="" type="checkbox"/> | <input type="checkbox"/> Dual use research of concern           |
| <input checked="" type="checkbox"/> | <input type="checkbox"/> Plants                                 |

### Methods

| n/a                                 | Involved in the study                           |
|-------------------------------------|-------------------------------------------------|
| <input checked="" type="checkbox"/> | <input type="checkbox"/> ChIP-seq               |
| <input checked="" type="checkbox"/> | <input type="checkbox"/> Flow cytometry         |
| <input checked="" type="checkbox"/> | <input type="checkbox"/> MRI-based neuroimaging |

## Antibodies

### Antibodies used

anti-6X His (ab18184, Abcam, 1:1,000)  
anti-mouse IgG<sup>647</sup> (ab150115, Abcam, 1:1,000)  
anti-FLAG (F1804, Sigma, 1:1,000)  
anti-6X His (Ab9108, Abcam, 1:1,000)  
anti-SOD1 (ab13498, Abcam, 1:5,000)  
anti-GAPDH (G8795, Sigma, 1:5,000)  
anti-Hsp70 (ab47455, Abcam, 1:1,000)  
anti-mouse IgG<sup>HRP</sup> (P044701-2, Agilent, 1:1,000)  
anti-rabbit IgG<sup>HRP</sup> (P044801-2, Agilent, 1:1,000)  
anti-synaptophysin (ab32594, Abcam, 1:800)  
anti-neurofilament heavy polypeptide (ab8135, Abcam, 1:1,000)  
anti-rabbit IgG<sup>HRP</sup> (ab150079, Abcam, 1:500)  
alpha-bungarotoxin<sup>488</sup> (B13422, Thermo Fisher Scientific, 1:2,000)

### Validation

anti-6X His (ab18184, Abcam, 1:1,000) Abcam provides evidence for use of antibody by western blot and cites 355 examples of published use: <https://www.abcam.com/en-us/products/primary-antibodies/6x-his-tag-antibody-hish8-ab18184>  
anti-mouse IgG<sup>647</sup> (ab150115, Abcam, 1:1,000) Abcam provides evidence for use of antibody by flow cytometry and western blot and cites 528 examples of published use: <https://www.abcam.com/en-us/products/secondary-antibodies/goat-mouse-igg-h-l-alexa-fluor-647-ab150115>  
anti-FLAG (F1804, Sigma, 1:1,000) Merck provides evidence for use of antibody by immunocytochemistry and cites 9,676 examples of published use: <https://www.sigmaaldrich.com/AU/en/product/sigma/f1804>  
anti-6X His (Ab9108, Abcam, 1:1,000) Abcam provides evidence for use of antibody by western blot and immunocytochemistry and cites 165 examples of published use: <https://www.abcam.com/en-us/products/primary-antibodies/6x-his-tag-antibody-ab9108>  
anti-SOD1 (ab13498, Abcam, 1:5,000) Abcam provides evidence for use of antibody by western blot and cites 189 examples of published use: <https://www.abcam.com/en-us/products/primary-antibodies/superoxide-dismutase-1-antibody-ab13498>  
anti-GAPDH (G8795, Sigma, 1:5,000) Merck provides evidence for use of antibody by western blot and immunocytochemistry and cites 1,344 examples of published use: <https://www.sigmaaldrich.com/AU/en/product/sigma/g8795>  
anti-Hsp70 (ab47455, Abcam, 1:1,000) Abcam provides evidence for use of antibody by western blot and cites 189 examples of published use: <https://www.abcam.com/en-us/products/primary-antibodies/hsp70-antibody>  
anti-mouse IgG<sup>HRP</sup> (P044701-2, Agilent, 1:1,000) Antibody is from reputable vendor: [https://www.agilent.com/store/en\\_US/Prod-P044701-2/P044701-2](https://www.agilent.com/store/en_US/Prod-P044701-2/P044701-2)  
anti-rabbit IgG<sup>HRP</sup> (P044801-2, Agilent, 1:1,000) Antibody is from reputable vendor: [https://www.agilent.com/store/en\\_US/Prod-P044801-2/P044801-2](https://www.agilent.com/store/en_US/Prod-P044801-2/P044801-2)  
anti-synaptophysin (ab32594, Abcam, 1:800) Abcam provides evidence for use of antibody by western blot and immunocytochemistry and cites 60 examples of published use: <https://www.abcam.com/en-us/products/primary-antibodies/synaptophysin-antibody-ab32594>  
anti-neurofilament heavy polypeptide (ab8135, Abcam, 1:1,000) Abcam provides evidence for use of antibody by western blot and immunohistochemistry and cites 166 examples of published use: <https://www.abcam.com/en-us/products/primary-antibodies/neurofilament-heavy-polypeptide-antibody-ab8135>  
anti-rabbit IgG<sup>HRP</sup> (ab150079, Abcam, 1:500) Abcam provides evidence for use of antibody by flow cytometry and immunocytochemistry and cites 439 examples of published use:  
alpha-bungarotoxin<sup>488</sup> (B13422, Thermo Fisher Scientific, 1:2,000) Thermo Fisher scientific cites 352 examples of published use: <https://www.thermofisher.com/order/catalog/product/B13422>

## Eukaryotic cell lines

Policy information about [cell lines and Sex and Gender in Research](#)

Cell line source(s)

HEK293 cells (ATCC CRL-1573) (sex not specified)  
Neuro-2a cells (ATCC CCL-131) (sex not specified)  
SH-SY5Y cells (ATCC CRL-2266) (female)

Authentication

All cell lines were originally purchased from ATCC, which has rigorous standards for cell line authentication using short tandem repeat profiling.

Mycoplasma contamination

All cell lines were tested negative for mycoplasma.

Commonly misidentified lines  
(See [ICLAC](#) register)

No commonly misidentified cell lines were used in this study.

## Palaeontology and Archaeology

Specimen provenance

Specimen deposition

Dating methods

☐ Tick this box to confirm that the raw and calibrated dates are available in the paper or in Supplementary Information.

Ethics oversight

Note that full information on the approval of the study protocol must also be provided in the manuscript.

## Animals and other research organisms

Policy information about [studies involving animals](#); [ARRIVE guidelines](#) recommended for reporting animal research, and [Sex and Gender in Research](#)

Laboratory animals

Female C57BL/6J and male B6SJL-Tg(SOD1\*G93A)1Gur/J were originally purchased from The Jackson Laboratory, United States. Female C57BL/6J were used to generate B6.Cg-Tg(hsyn-mUbl)Yer/j. Male B6SJL-Tg(SOD1\*G93A)1Gur/J mice were mated with female B6.Cg-Tg(hsyn-mUbl)Yer/j to produce offspring presented in this study.

Wild animals

Reporting on sex

Both male and female mouse data is reported

Field-collected samples

Ethics oversight

All animal experiments were approved by the University of Wollongong Animal Ethics Committee (approval number: AEPR21/10) and complied with the Australian National Health and Medical Research Centre code of practice for the care and use of animals for scientific purposes

Note that full information on the approval of the study protocol must also be provided in the manuscript.

## Clinical data

Policy information about [clinical studies](#)

All manuscripts should comply with the ICMJE [guidelines for publication of clinical research](#) and a completed [CONSORT checklist](#) must be included with all submissions.

Clinical trial registration

Study protocol

Data collection

Outcomes

## Dual use research of concern

Policy information about [dual use research of concern](#)

### Hazards

Could the accidental, deliberate or reckless misuse of agents or technologies generated in the work, or the application of information presented in the manuscript, pose a threat to:

| No                       | Yes                                                 |
|--------------------------|-----------------------------------------------------|
| <input type="checkbox"/> | <input type="checkbox"/> Public health              |
| <input type="checkbox"/> | <input type="checkbox"/> National security          |
| <input type="checkbox"/> | <input type="checkbox"/> Crops and/or livestock     |
| <input type="checkbox"/> | <input type="checkbox"/> Ecosystems                 |
| <input type="checkbox"/> | <input type="checkbox"/> Any other significant area |

## Experiments of concern

Does the work involve any of these experiments of concern:

| No                       | Yes                                                                                                  |
|--------------------------|------------------------------------------------------------------------------------------------------|
| <input type="checkbox"/> | <input type="checkbox"/> Demonstrate how to render a vaccine ineffective                             |
| <input type="checkbox"/> | <input type="checkbox"/> Confer resistance to therapeutically useful antibiotics or antiviral agents |
| <input type="checkbox"/> | <input type="checkbox"/> Enhance the virulence of a pathogen or render a nonpathogen virulent        |
| <input type="checkbox"/> | <input type="checkbox"/> Increase transmissibility of a pathogen                                     |
| <input type="checkbox"/> | <input type="checkbox"/> Alter the host range of a pathogen                                          |
| <input type="checkbox"/> | <input type="checkbox"/> Enable evasion of diagnostic/detection modalities                           |
| <input type="checkbox"/> | <input type="checkbox"/> Enable the weaponization of a biological agent or toxin                     |
| <input type="checkbox"/> | <input type="checkbox"/> Any other potentially harmful combination of experiments and agents         |

## Plants

Seed stocks

Novel plant genotypes

Authentication

## ChIP-seq

### Data deposition

- ☐ Confirm that both raw and final processed data have been deposited in a public database such as [GEO](#).
- ☐ Confirm that you have deposited or provided access to graph files (e.g. BED files) for the called peaks.

Data access links

*May remain private before publication.*

Files in database submission

Genome browser session

(e.g. [UCSC](#))

### Methodology

Replicates

Sequencing depth

Antibodies

Peak calling parameters

Data quality

## Flow Cytometry

### Plots

Confirm that:

- ☐ The axis labels state the marker and fluorochrome used (e.g. CD4-FITC).
- ☐ The axis scales are clearly visible. Include numbers along axes only for bottom left plot of group (a 'group' is an analysis of identical markers).
- ☐ All plots are contour plots with outliers or pseudocolor plots.
- ☐ A numerical value for number of cells or percentage (with statistics) is provided.

### Methodology

Sample preparation

Instrument

Software

Cell population abundance

Gating strategy

- ☐ Tick this box to confirm that a figure exemplifying the gating strategy is provided in the Supplementary Information.

## Magnetic resonance imaging

### Experimental design

Design type

Design specifications

Behavioral performance measures

Imaging type(s)

Field strength

Sequence & imaging parameters

Area of acquisition

Diffusion MRI

☐ Used

☐ Not used

### Preprocessing

Preprocessing software

Normalization

Normalization template

Noise and artifact removal

Volume censoring

### Statistical modeling & inference

Model type and settings

Effect(s) tested

Specify type of analysis: ☐ Whole brain ☐ ROI-based ☐ Both

Statistic type for inference

(See [Eklund et al. 2016](#))

Correction

**Models & analysis**

n/a | Involved in the study

☐☐ Functional and/or effective connectivity☐☐ Graph analysis☐☐ Multivariate modeling or predictive analysis

Functional and/or effective connectivity

Graph analysis

Multivariate modeling and predictive analysis

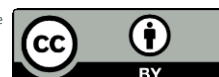

Supplement: Supplementary file 3 [file 83e9cec3c19c4e6457dec82e.pdf]
