# Supplementary material for: Development of a targeted BioPROTAC degrader selective for misfolded SOD1
Source: Research Square preprint supplement (doi:10.21203/rs.3.rs-6070925/v1), 2025-03-09
Supplement: Supplementary file 1 [file 6b06ca8b5cdaa5cce026193c.xlsx]

## Sheet: Sup Table 2
Supplementary Table 2. Statistical tests, comparisons and results from the study of development of a targeted BioPROTAC degrader selective for misfolded SOD1.
Figure and Panel	Samples	Summary	P value	Statistical test	Multiple comparisons test	F/t value or KW statistic	Degrees of freedom F (DFn, DFd)	n
2A	Control BP vs. BP 1	****	<0.0001	2-way ANOVA	Dunnet’s	131.9	7, 315	3
	Control BP vs. BP 2	****	<0.0001	2-way ANOVA	Dunnet’s	131.9	7, 315	3
	Control BP vs. BP 3	****	<0.0001	2-way ANOVA	Dunnet’s	131.9	7, 315	3
	Control BP vs. BP 4	****	<0.0001	2-way ANOVA	Dunnet’s	131.9	7, 315	3
	Control BP vs. BP 5	****	<0.0001	2-way ANOVA	Dunnet’s	131.9	7, 315	3
	Control BP vs. BP 6	****	<0.0001	2-way ANOVA	Dunnet’s	131.9	7, 315	3
	Control BP vs. BP 7	ns	0.8413	2-way ANOVA	Dunnet’s	131.9	7, 315	3
2B	Control BP vs. BP 1	**	0.0024	2-way ANOVA	Dunnet’s	14.01	7, 315	3
	Control BP vs. BP 2	ns	0.5834	2-way ANOVA	Dunnet’s	14.01	7, 315	3
	Control BP vs. BP 3	*	0.0453	2-way ANOVA	Dunnet’s	14.01	7, 315	3
	Control BP vs. BP 4	***	0.0002	2-way ANOVA	Dunnet’s	14.01	7, 315	3
	Control BP vs. BP 5	**	0.0044	2-way ANOVA	Dunnet’s	14.01	7, 315	3
	Control BP vs. BP 6	ns	0.748	2-way ANOVA	Dunnet’s	14.01	7, 315	3
	Control BP vs. BP 7	ns	0.613	2-way ANOVA	Dunnet’s	14.01	7, 315	3
2D	Control BP vs. BP 1	ns	0.0699	ordinary 1-way ANOVA	Dunnet’s	9.059	7, 64	9
	Control BP vs. BP 2	****	<0.0001	ordinary 1-way ANOVA	Dunnet’s	9.059	7, 64	9
	Control BP vs. BP 3	****	<0.0001	ordinary 1-way ANOVA	Dunnet’s	9.059	7, 64	9
	Control BP vs. BP 4	***	0.001	ordinary 1-way ANOVA	Dunnet’s	9.059	7, 64	9
	Control BP vs. BP 5	ns	0.8507	ordinary 1-way ANOVA	Dunnet’s	9.059	7, 64	9
	Control BP vs. BP 6	****	<0.0001	ordinary 1-way ANOVA	Dunnet’s	9.059	7, 64	9
	Control BP vs. BP 7	*	0.0463	ordinary 1-way ANOVA	Dunnet’s	9.059	7, 64	9
2E	Control BP vs. BP 1	****	<0.0001	KW ANOVA	Dunn's	8578	7	1867-3445
	Control BP vs. BP 2	ns	0.3267	KW ANOVA	Dunn's	8578	7	1867-3445
	Control BP vs. BP 3	****	<0.0001	KW ANOVA	Dunn's	8578	7	1867-3445
	Control BP vs. BP 4	****	<0.0001	KW ANOVA	Dunn's	8578	7	1867-3445
	Control BP vs. BP 5	****	<0.0001	KW ANOVA	Dunn's	8578	7	1867-3445
	Control BP vs. BP 6	ns	>0.9999	KW ANOVA	Dunn's	8578	7	1867-3445
	Control BP vs. BP 7	****	<0.0001	KW ANOVA	Dunn's	8578	7	1867-3445
2F	Control BP vs. BP 1	****	<0.0001	KW ANOVA	Dunn's	16666	7	1867-3445
	Control BP vs. BP 2	****	<0.0001	KW ANOVA	Dunn's	16666	7	1867-3445
	Control BP vs. BP 3	****	<0.0001	KW ANOVA	Dunn's	16666	7	1867-3445
	Control BP vs. BP 4	****	<0.0001	KW ANOVA	Dunn's	16666	7	1867-3445
	Control BP vs. BP 5	****	<0.0001	KW ANOVA	Dunn's	16666	7	1867-3445
	Control BP vs. BP 6	****	<0.0001	KW ANOVA	Dunn's	16666	7	1867-3445
	Control BP vs. BP 7	****	<0.0001	KW ANOVA	Dunn's	16666	7	1867-3445
2H	Control vs. A4V	***	0.0001	ordinary 1-way ANOVA	Dunnet’s	9.11	9	3
	Control vs. G93A	***	0.0001	ordinary 1-way ANOVA	Dunnet’s	9.11	9	3
	Control vs. G85R	****	<0.0001	ordinary 1-way ANOVA	Dunnet’s	9.11	9	3
	Control vs. D90A	***	0.0008	ordinary 1-way ANOVA	Dunnet’s	9.11	9	3
	Control vs. V148G	****	<0.0001	ordinary 1-way ANOVA	Dunnet’s	9.11	9	3
	Control vs. H46R	****	<0.0001	ordinary 1-way ANOVA	Dunnet’s	9.11	9	3
	Control vs. G37R	***	0.0003	ordinary 1-way ANOVA	Dunnet’s	9.11	9	3
	Control vs. C6G	****	<0.0001	ordinary 1-way ANOVA	Dunnet’s	9.11	9	3
	Control vs. E100G	***	0.0002	ordinary 1-way ANOVA	Dunnet’s	9.11	9	3
2I	A4V vs. WT	****	<0.0001	unpaired 2-tailed t-test	NA	26.96	4	3
3B	CHIP vs. UBE4A	ns	0.2699	ordinary 1-way ANOVA	Tukey's	10.42	3, 8	3
	CHIP vs. Parkin	ns	0.1126	ordinary 1-way ANOVA	Tukey's	10.42	3, 8	3
	CHIP vs. RNF4	ns	0.0906	ordinary 1-way ANOVA	Tukey's	10.42	3, 8	3
	UBE4A vs. Parkin	**	0.0075	ordinary 1-way ANOVA	Tukey's	10.42	3, 8	3
	UBE4A vs. RNF4	**	0.0062	ordinary 1-way ANOVA	Tukey's	10.42	3, 8	3
	Parkin vs. RNF4	ns	0.9986	ordinary 1-way ANOVA	Tukey's	10.42	3, 8	3
3C	CHIP vs. UBE4A	***	0.0004	ordinary 1-way ANOVA	Tukey's	43.16	7, 17	3
	CHIP vs. NEDD4L	**	0.0022	ordinary 1-way ANOVA	Tukey's	43.16	7, 17	3
	CHIP vs. UBR5	***	0.0001	ordinary 1-way ANOVA	Tukey's	43.16	7, 17	3
	CHIP vs. Parkin	ns	0.9997	ordinary 1-way ANOVA	Tukey's	43.16	7, 17	3
	CHIP vs. UBOX5	ns	>0.9999	ordinary 1-way ANOVA	Tukey's	43.16	7, 17	3
	CHIP vs. BTrCP	****	<0.0001	ordinary 1-way ANOVA	Tukey's	43.16	7, 17	3
	CHIP vs. RNF4	ns	>0.9999	ordinary 1-way ANOVA	Tukey's	43.16	7, 17	3
	UBE4A vs. NEDD4L	ns	0.9752	ordinary 1-way ANOVA	Tukey's	43.16	7, 17	3
	UBE4A vs. UBR5	ns	0.9991	ordinary 1-way ANOVA	Tukey's	43.16	7, 17	3
	UBE4A vs. Parkin	***	0.0008	ordinary 1-way ANOVA	Tukey's	43.16	7, 17	3
	UBE4A vs. UBOX5	***	0.0003	ordinary 1-way ANOVA	Tukey's	43.16	7, 17	3
	UBE4A vs. BTrCP	****	<0.0001	ordinary 1-way ANOVA	Tukey's	43.16	7, 17	3
	UBE4A vs. RNF4	***	0.0005	ordinary 1-way ANOVA	Tukey's	43.16	7, 17	3
	NEDD4L vs. UBR5	ns	0.799	ordinary 1-way ANOVA	Tukey's	43.16	7, 17	3
	NEDD4L vs. Parkin	**	0.0052	ordinary 1-way ANOVA	Tukey's	43.16	7, 17	3
	NEDD4L vs. UBOX5	**	0.0018	ordinary 1-way ANOVA	Tukey's	43.16	7, 17	3
	NEDD4L vs. BTrCP	****	<0.0001	ordinary 1-way ANOVA	Tukey's	43.16	7, 17	3
	NEDD4L vs. RNF4	**	0.0027	ordinary 1-way ANOVA	Tukey's	43.16	7, 17	3
	UBR5 vs. Parkin	***	0.0003	ordinary 1-way ANOVA	Tukey's	43.16	7, 17	3
	UBR5 vs. UBOX5	***	0.0001	ordinary 1-way ANOVA	Tukey's	43.16	7, 17	3
	UBR5 vs. BTrCP	***	0.0002	ordinary 1-way ANOVA	Tukey's	43.16	7, 17	3
	UBR5 vs. RNF4	***	0.0002	ordinary 1-way ANOVA	Tukey's	43.16	7, 17	3
	Parkin vs. UBOX5	ns	0.999	ordinary 1-way ANOVA	Tukey's	43.16	7, 17	3
	Parkin vs. BTrCP	****	<0.0001	ordinary 1-way ANOVA	Tukey's	43.16	7, 17	3
	Parkin vs. RNF4	ns	>0.9999	ordinary 1-way ANOVA	Tukey's	43.16	7, 17	3
	UBOX5 vs. BTrCP	****	<0.0001	ordinary 1-way ANOVA	Tukey's	43.16	7, 17	3
	UBOX5 vs. RNF4	ns	>0.9999	ordinary 1-way ANOVA	Tukey's	43.16	7, 17	3
	BTrCP vs. RNF4	****	<0.0001	ordinary 1-way ANOVA	Tukey's	43.16	7, 17	3
3D	Control vs. CHIP	****	<0.0001	KW ANOVA	Dunn's	19623	8	2565-6408
	Control vs. UBE4A	****	<0.0001	KW ANOVA	Dunn's	19623	8	2565-6408
	Control vs. NEDD4L	****	<0.0001	KW ANOVA	Dunn's	19623	8	2565-6408
	Control vs. UBR5	****	<0.0001	KW ANOVA	Dunn's	19623	8	2565-6408
	Control vs. Parkin	****	<0.0001	KW ANOVA	Dunn's	19623	8	2565-6408
	Control vs. UBOX5	****	<0.0001	KW ANOVA	Dunn's	19623	8	2565-6408
	Control vs. BTrCP	****	<0.0001	KW ANOVA	Dunn's	19623	8	2565-6408
	Control vs. RNF4	**	0.0023	KW ANOVA	Dunn's	19623	8	2565-6408
3E	Control vs. CHIP	****	<0.0001	KW ANOVA	Dunn's	17176	8	2565-6408
	Control vs. UBE4A	****	<0.0001	KW ANOVA	Dunn's	17176	8	2565-6408
	Control vs. NEDD4L	****	<0.0001	KW ANOVA	Dunn's	17176	8	2565-6408
	Control vs. UBR5	****	<0.0001	KW ANOVA	Dunn's	17176	8	2565-6408
	Control vs. Parkin	****	<0.0001	KW ANOVA	Dunn's	17176	8	2565-6408
	Control vs. UBOX5	****	<0.0001	KW ANOVA	Dunn's	17176	8	2565-6408
	Control vs. BTrCP	****	<0.0001	KW ANOVA	Dunn's	17176	8	2565-6408
	Control vs. RNF4	****	<0.0001	KW ANOVA	Dunn's	17176	8	2565-6408
3F	Control vs. CHIP	****	<0.0001	ordinary 1-way ANOVA	Dunnett's	19.45	8, 18	3
	Control vs. UBE4A	****	<0.0001	ordinary 1-way ANOVA	Dunnett's	19.45	8, 18	3
	Control vs. NEDD4L	ns	0.0751	ordinary 1-way ANOVA	Dunnett's	19.45	8, 18	3
	Control vs. UBR5	ns	>0.9999	ordinary 1-way ANOVA	Dunnett's	19.45	8, 18	3
	Control vs. Parkin	****	<0.0001	ordinary 1-way ANOVA	Dunnett's	19.45	8, 18	3
	Control vs. UBOX5	ns	0.9973	ordinary 1-way ANOVA	Dunnett's	19.45	8, 18	3
	Control vs. BTrCP	ns	0.995	ordinary 1-way ANOVA	Dunnett's	19.45	8, 18	3
	Control vs. RNF4	ns	0.2164	ordinary 1-way ANOVA	Dunnett's	19.45	8, 18	3
4A - SOD1G93A	Control vs. BP2	*	0.02	RM 1-way ANOVA	Tukey's	66.24	1.272, 2.545	3
	Control vs. BP2ΔCHIP	ns	0.2773	RM 1-way ANOVA	Tukey's	66.24	1.272, 2.545	3
	BP2 vs. BP2ΔCHIP	**	0.0062	RM 1-way ANOVA	Tukey's	66.24	1.272, 2.545	3
4A - SOD1A4V	Control vs. BP2	*	0.0106	RM 1-way ANOVA	Tukey's	117.4	1.734, 3.468	3
	Control vs. BP2ΔCHIP	*	0.042	RM 1-way ANOVA	Tukey's	117.4	1.734, 3.468	3
	BP2 vs. BP2ΔCHIP	*	0.0186	RM 1-way ANOVA	Tukey's	117.4	1.734, 3.468	3
4B - SOD1	SOD1G93A-EGFP vs. Control	ns	0.3757	ordinary 1-way ANOVA	Tukey's	26.24	9, 20	3
	SOD1G93A-EGFP vs. BP2 (0.05µg)	****	<0.0001	ordinary 1-way ANOVA	Tukey's	26.24	9, 20	3
	SOD1G93A-EGFP vs. BP2 (0.1µg)	****	<0.0001	ordinary 1-way ANOVA	Tukey's	26.24	9, 20	3
	SOD1G93A-EGFP vs. BP2 (0.5µg)	****	<0.0001	ordinary 1-way ANOVA	Tukey's	26.24	9, 20	3
	SOD1G93A-EGFP vs. BP2 (0.75µg)	****	<0.0001	ordinary 1-way ANOVA	Tukey's	26.24	9, 20	3
	SOD1G93A-EGFP vs. BP2ΔCHIP (0.05µg)	ns	0.3077	ordinary 1-way ANOVA	Tukey's	26.24	9, 20	3
	SOD1G93A-EGFP vs. BP2ΔCHIP (0.1µg)	ns	0.1282	ordinary 1-way ANOVA	Tukey's	26.24	9, 20	3
	SOD1G93A-EGFP vs. BP2ΔCHIP (0.5µg)	ns	0.996	ordinary 1-way ANOVA	Tukey's	26.24	9, 20	3
	SOD1G93A-EGFP vs. BP2ΔCHIP (0.75µg)	*	0.0113	ordinary 1-way ANOVA	Tukey's	26.24	9, 20	3
	Control vs. BP2 (0.05µg)	****	<0.0001	ordinary 1-way ANOVA	Tukey's	26.24	9, 20	3
	Control vs. BP2 (0.1µg)	****	<0.0001	ordinary 1-way ANOVA	Tukey's	26.24	9, 20	3
	Control vs. BP2 (0.5µg)	****	<0.0001	ordinary 1-way ANOVA	Tukey's	26.24	9, 20	3
	Control vs. BP2 (0.75µg)	****	<0.0001	ordinary 1-way ANOVA	Tukey's	26.24	9, 20	3
	Control vs. BP2ΔCHIP (0.05µg)	**	0.0025	ordinary 1-way ANOVA	Tukey's	26.24	9, 20	3
	Control vs. BP2ΔCHIP (0.1µg)	***	0.0008	ordinary 1-way ANOVA	Tukey's	26.24	9, 20	3
	Control vs. BP2ΔCHIP (0.5µg)	ns	0.0868	ordinary 1-way ANOVA	Tukey's	26.24	9, 20	3
	Control vs. BP2ΔCHIP (0.75µg)	****	<0.0001	ordinary 1-way ANOVA	Tukey's	26.24	9, 20	3
	BP2 (0.05µg) vs. BP2 (0.1µg)	ns	0.9822	ordinary 1-way ANOVA	Tukey's	26.24	9, 20	3
	BP2 (0.05µg) vs. BP2 (0.5µg)	ns	0.9314	ordinary 1-way ANOVA	Tukey's	26.24	9, 20	3
	BP2 (0.05µg) vs. BP2 (0.75µg)	ns	0.8823	ordinary 1-way ANOVA	Tukey's	26.24	9, 20	3
	BP2 (0.05µg) vs. BP2ΔCHIP (0.05µg)	*	0.0226	ordinary 1-way ANOVA	Tukey's	26.24	9, 20	3
	BP2 (0.05µg) vs. BP2ΔCHIP (0.1µg)	ns	0.0657	ordinary 1-way ANOVA	Tukey's	26.24	9, 20	3
	BP2 (0.05µg) vs. BP2ΔCHIP (0.5µg)	***	0.0006	ordinary 1-way ANOVA	Tukey's	26.24	9, 20	3
	BP2 (0.05µg) vs. BP2ΔCHIP (0.75µg)	ns	0.4797	ordinary 1-way ANOVA	Tukey's	26.24	9, 20	3
	BP2 (0.1µg) vs. BP2 (0.5µg)	ns	>0.9999	ordinary 1-way ANOVA	Tukey's	26.24	9, 20	3
	BP2 (0.1µg) vs. BP2 (0.75µg)	ns	>0.9999	ordinary 1-way ANOVA	Tukey's	26.24	9, 20	3
	BP2 (0.1µg) vs. BP2ΔCHIP (0.05µg)	**	0.0022	ordinary 1-way ANOVA	Tukey's	26.24	9, 20	3
	BP2 (0.1µg) vs. BP2ΔCHIP (0.1µg)	**	0.0069	ordinary 1-way ANOVA	Tukey's	26.24	9, 20	3
	BP2 (0.1µg) vs. BP2ΔCHIP (0.5µg)	****	<0.0001	ordinary 1-way ANOVA	Tukey's	26.24	9, 20	3
	BP2 (0.1µg) vs. BP2ΔCHIP (0.75µg)	ns	0.0831	ordinary 1-way ANOVA	Tukey's	26.24	9, 20	3
	BP2 (0.5µg) vs. BP2 (0.75µg)	ns	>0.9999	ordinary 1-way ANOVA	Tukey's	26.24	9, 20	3
	BP2 (0.5µg) vs. BP2ΔCHIP (0.05µg)	**	0.0012	ordinary 1-way ANOVA	Tukey's	26.24	9, 20	3
	BP2 (0.5µg) vs. BP2ΔCHIP (0.1µg)	**	0.0038	ordinary 1-way ANOVA	Tukey's	26.24	9, 20	3
	BP2 (0.5µg) vs. BP2ΔCHIP (0.5µg)	****	<0.0001	ordinary 1-way ANOVA	Tukey's	26.24	9, 20	3
	BP2 (0.5µg) vs. BP2ΔCHIP (0.75µg)	*	0.0488	ordinary 1-way ANOVA	Tukey's	26.24	9, 20	3
	BP2 (0.75µg) vs. BP2ΔCHIP (0.05µg)	***	0.0009	ordinary 1-way ANOVA	Tukey's	26.24	9, 20	3
	BP2 (0.75µg) vs. BP2ΔCHIP (0.1µg)	**	0.0028	ordinary 1-way ANOVA	Tukey's	26.24	9, 20	3
	BP2 (0.75µg) vs. BP2ΔCHIP (0.5µg)	****	<0.0001	ordinary 1-way ANOVA	Tukey's	26.24	9, 20	3
	BP2 (0.75µg) vs. BP2ΔCHIP (0.75µg)	*	0.0362	ordinary 1-way ANOVA	Tukey's	26.24	9, 20	3
	BP2ΔCHIP (0.05µg) vs. BP2ΔCHIP (0.1µg)	ns	>0.9999	ordinary 1-way ANOVA	Tukey's	26.24	9, 20	3
	BP2ΔCHIP (0.05µg) vs. BP2ΔCHIP (0.5µg)	ns	0.7978	ordinary 1-way ANOVA	Tukey's	26.24	9, 20	3
	BP2ΔCHIP (0.05µg) vs. BP2ΔCHIP (0.75µg)	ns	0.777	ordinary 1-way ANOVA	Tukey's	26.24	9, 20	3
	BP2ΔCHIP (0.1µg) vs. BP2ΔCHIP (0.5µg)	ns	0.4919	ordinary 1-way ANOVA	Tukey's	26.24	9, 20	3
	BP2ΔCHIP (0.1µg) vs. BP2ΔCHIP (0.75µg)	ns	0.9652	ordinary 1-way ANOVA	Tukey's	26.24	9, 20	3
	BP2ΔCHIP	ns	0.0684	ordinary 1-way ANOVA	Tukey's	26.24	9, 20	3
4B - Hsp70	SOD1G93A-EGFP vs. Control	ns	0.6414	ordinary 1-way ANOVA	Tukey's	1.792	9, 20	3
	SOD1G93A-EGFP vs. BP2 (0.05µg)	ns	0.7285	ordinary 1-way ANOVA	Tukey's	1.792	9, 20	3
	SOD1G93A-EGFP vs. BP2 (0.1µg)	ns	0.9796	ordinary 1-way ANOVA	Tukey's	1.792	9, 20	3
	SOD1G93A-EGFP vs. BP2 (0.5µg)	ns	0.9917	ordinary 1-way ANOVA	Tukey's	1.792	9, 20	3
	SOD1G93A-EGFP vs. BP2 (0.75µg)	ns	0.497	ordinary 1-way ANOVA	Tukey's	1.792	9, 20	3
	SOD1G93A-EGFP vs. BP2ΔCHIP(0.05µg)	ns	>0.9999	ordinary 1-way ANOVA	Tukey's	1.792	9, 20	3
	SOD1G93A-EGFP vs. BP2ΔCHIP(0.1µg)	ns	>0.9999	ordinary 1-way ANOVA	Tukey's	1.792	9, 20	3
	SOD1G93A-EGFP vs. BP2ΔCHIP(0.5µg)	ns	>0.9999	ordinary 1-way ANOVA	Tukey's	1.792	9, 20	3
	SOD1G93A-EGFP vs. BP2ΔCHIP(0.75µg)	ns	>0.9999	ordinary 1-way ANOVA	Tukey's	1.792	9, 20	3
	Control vs. BP2 (0.05µg)	ns	>0.9999	ordinary 1-way ANOVA	Tukey's	1.792	9, 20	3
	Control vs. BP2 (0.1µg)	ns	0.9965	ordinary 1-way ANOVA	Tukey's	1.792	9, 20	3
	Control vs. BP2 (0.5µg)	ns	0.9897	ordinary 1-way ANOVA	Tukey's	1.792	9, 20	3
	Control vs. BP2 (0.75µg)	ns	>0.9999	ordinary 1-way ANOVA	Tukey's	1.792	9, 20	3
	Control vs. BP2ΔCHIP(0.05µg)	ns	0.7338	ordinary 1-way ANOVA	Tukey's	1.792	9, 20	3
	Control vs. BP2ΔCHIP(0.1µg)	ns	0.8036	ordinary 1-way ANOVA	Tukey's	1.792	9, 20	3
	Control vs. BP2ΔCHIP(0.5µg)	ns	0.6073	ordinary 1-way ANOVA	Tukey's	1.792	9, 20	3
	Control vs. BP2ΔCHIP(0.75µg)	ns	0.3539	ordinary 1-way ANOVA	Tukey's	1.792	9, 20	3
	BP2 (0.05µg) vs. BP2 (0.1µg)	ns	0.9992	ordinary 1-way ANOVA	Tukey's	1.792	9, 20	3
	BP2 (0.05µg) vs. BP2 (0.5µg)	ns	0.9967	ordinary 1-way ANOVA	Tukey's	1.792	9, 20	3
	BP2 (0.05µg) vs. BP2 (0.75µg)	ns	>0.9999	ordinary 1-way ANOVA	Tukey's	1.792	9, 20	3
	BP2 (0.05µg) vs. BP2ΔCHIP(0.05µg)	ns	0.8125	ordinary 1-way ANOVA	Tukey's	1.792	9, 20	3
	BP2 (0.05µg) vs. BP2ΔCHIP(0.1µg)	ns	0.8713	ordinary 1-way ANOVA	Tukey's	1.792	9, 20	3
	BP2 (0.05µg) vs. BP2ΔCHIP(0.5µg)	ns	0.6961	ordinary 1-way ANOVA	Tukey's	1.792	9, 20	3
	BP2 (0.05µg) vs. BP2ΔCHIP(0.75µg)	ns	0.4326	ordinary 1-way ANOVA	Tukey's	1.792	9, 20	3
	BP2 (0.1µg) vs. BP2 (0.5µg)	ns	>0.9999	ordinary 1-way ANOVA	Tukey's	1.792	9, 20	3
	BP2 (0.1µg) vs. BP2 (0.75µg)	ns	0.9805	ordinary 1-way ANOVA	Tukey's	1.792	9, 20	3
	BP2 (0.1µg) vs. BP2ΔCHIP(0.05µg)	ns	0.9928	ordinary 1-way ANOVA	Tukey's	1.792	9, 20	3
	BP2 (0.1µg) vs. BP2ΔCHIP(0.1µg)	ns	0.9975	ordinary 1-way ANOVA	Tukey's	1.792	9, 20	3
	BP2 (0.1µg) vs. BP2ΔCHIP(0.5µg)	ns	0.972	ordinary 1-way ANOVA	Tukey's	1.792	9, 20	3
	BP2 (0.1µg) vs. BP2ΔCHIP(0.75µg)	ns	0.8379	ordinary 1-way ANOVA	Tukey's	1.792	9, 20	3
	BP2 (0.5µg) vs. BP2 (0.75µg)	ns	0.9589	ordinary 1-way ANOVA	Tukey's	1.792	9, 20	3
	BP2 (0.5µg) vs. BP2ΔCHIP(0.05µg)	ns	0.9977	ordinary 1-way ANOVA	Tukey's	1.792	9, 20	3
	BP2 (0.5µg) vs. BP2ΔCHIP(0.1µg)	ns	0.9994	ordinary 1-way ANOVA	Tukey's	1.792	9, 20	3
	BP2 (0.5µg) vs. BP2ΔCHIP(0.5µg)	ns	0.9878	ordinary 1-way ANOVA	Tukey's	1.792	9, 20	3
	BP2 (0.5µg) vs. BP2ΔCHIP(0.75µg)	ns	0.8954	ordinary 1-way ANOVA	Tukey's	1.792	9, 20	3
	BP2 (0.75µg) vs. BP2ΔCHIP(0.05µg)	ns	0.5917	ordinary 1-way ANOVA	Tukey's	1.792	9, 20	3
	BP2 (0.75µg) vs. BP2ΔCHIP(0.1µg)	ns	0.6704	ordinary 1-way ANOVA	Tukey's	1.792	9, 20	3
	BP2 (0.75µg) vs. BP2ΔCHIP(0.5µg)	ns	0.4643	ordinary 1-way ANOVA	Tukey's	1.792	9, 20	3
	BP2 (0.75µg) vs. BP2ΔCHIP(0.75µg)	ns	0.2465	ordinary 1-way ANOVA	Tukey's	1.792	9, 20	3
	BP2ΔCHIP(0.05µg) vs. BP2ΔCHIP(0.1µg)	ns	>0.9999	ordinary 1-way ANOVA	Tukey's	1.792	9, 20	3
	BP2ΔCHIP(0.05µg) vs. BP2ΔCHIP(0.5µg)	ns	>0.9999	ordinary 1-way ANOVA	Tukey's	1.792	9, 20	3
	BP2ΔCHIP(0.05µg) vs. BP2ΔCHIP(0.75µg)	ns	0.9995	ordinary 1-way ANOVA	Tukey's	1.792	9, 20	3
	BP2ΔCHIP(0.1µg) vs. BP2ΔCHIP(0.5µg)	ns	>0.9999	ordinary 1-way ANOVA	Tukey's	1.792	9, 20	3
	BP2ΔCHIP(0.1µg) vs. BP2ΔCHIP(0.75µg)	ns	0.9981	ordinary 1-way ANOVA	Tukey's	1.792	9, 20	3
	BP2	ns	>0.9999	ordinary 1-way ANOVA	Tukey's	1.792	9, 20	3
4C	Control vs. BP2ΔCHIP	**	0.0024	ordinary 1-way ANOVA	Tukey's	15.32	3, 8	3
	Control vs. BP2ΔCHIP + 5µM MG132	**	0.0013	ordinary 1-way ANOVA	Tukey's	15.32	3, 8	3
	Control vs. BP2ΔCHIP + 10µM MG132	*	0.01	ordinary 1-way ANOVA	Tukey's	15.32	3, 8	3
	BP2ΔCHIP vs. BP2ΔCHIP + 5µM MG132	ns	0.9486	ordinary 1-way ANOVA	Tukey's	15.32	3, 8	3
	BP2ΔCHIP vs. BP2ΔCHIP + 10µM MG132	ns	0.6574	ordinary 1-way ANOVA	Tukey's	15.32	3, 8	3
	BP2ΔCHIP + 5µM MG132 vs. BP2ΔCHIP + 10µM MG132	ns	0.3793	ordinary 1-way ANOVA	Tukey's	15.32	3, 8	3
	Control vs. BP2	****	<0.0001	ordinary 1-way ANOVA	Tukey's	35.48	3, 8	3
	Control vs. BP2 + 5µM MG132	**	0.0023	ordinary 1-way ANOVA	Tukey's	35.48	3, 8	3
	Control vs. BP2 + 10µM MG132	ns	0.3166	ordinary 1-way ANOVA	Tukey's	35.48	3, 8	3
	BP2 vs. BP2 + 5µM MG132	*	0.0186	ordinary 1-way ANOVA	Tukey's	35.48	3, 8	3
	BP2 vs. BP2 + 10µM MG132	***	0.0003	ordinary 1-way ANOVA	Tukey's	35.48	3, 8	3
	BP2 + 5µM MG132 vs. BP2 + 10µM MG132	*	0.0239	ordinary 1-way ANOVA	Tukey's	35.48	3, 8	3
4D	Control vs. BP2ΔCHIP	**	0.0062	ordinary 1-way ANOVA	Tukey's	16.87	3, 8	3
	Control vs. BP2ΔCHIP + 100nM Baf.A1	ns	0.9993	ordinary 1-way ANOVA	Tukey's	16.87	3, 8	3
	Control vs. BP2ΔCHIP + 500nM Baf.A1	ns	0.2241	ordinary 1-way ANOVA	Tukey's	16.87	3, 8	3
	BP2ΔCHIP vs. BP2ΔCHIP + 100nM Baf.A1	**	0.0072	ordinary 1-way ANOVA	Tukey's	16.87	3, 8	3
	BP2ΔCHIP vs. BP2ΔCHIP + 500nM Baf.A1	***	0.0006	ordinary 1-way ANOVA	Tukey's	16.87	3, 8	3
	BP2ΔCHIP + 100nM Baf.A1 vs. BP2ΔCHIP + 500nM Baf.A1	ns	0.19	ordinary 1-way ANOVA	Tukey's	16.87	3, 8	3
	Control vs. BP2	***	0.0001	ordinary 1-way ANOVA	Tukey's	27.97	3, 8	3
	Control vs. BP2 + 100nM Baf.A1	***	0.0009	ordinary 1-way ANOVA	Tukey's	27.97	3, 8	3
	Control vs. BP2 + 500nM Baf.A1	*	0.0121	ordinary 1-way ANOVA	Tukey's	27.97	3, 8	3
	BP2 vs. BP2 + 100nM Baf.A1	ns	0.1524	ordinary 1-way ANOVA	Tukey's	27.97	3, 8	3
	BP2 vs. BP2 + 500nM Baf.A1	**	0.008	ordinary 1-way ANOVA	Tukey's	27.97	3, 8	3
	BP2 + 100nM Baf.A1 vs. BP2 + 500nM Baf.A1	ns	0.2154	ordinary 1-way ANOVA	Tukey's	27.97	3, 8	3
5C	Brain vs. Spinal cord	**	0.0019	unpaired 2-tailed t-test	NA	7.32	4	3
5E	SOD1G93A/WT vs. SOD1G93A/mUbL	****	<0.0001	RM 1-way ANOVA	Tukey's	54.14	1.017, 63.08	11
5F	SOD1G93A/WT vs. SOD1G93A/mUbL	ns	0.1865	RM 1-way ANOVA	Tukey's	71.07	1.006, 62.38	10, 12
5G	SOD1G93A/WT vs. SOD1G93A/mUbL	****	<0.0001	RM 1-way ANOVA	Tukey's	38.96	1.390, 26.41	11
5H	SOD1G93A/WT vs. SOD1G93A/mUbL	****	<0.0001	RM 1-way ANOVA	Tukey's	173.3	1.666, 31.65	10, 12
5I	SOD1G93A/WT vs. SOD1G93A/mUbL	****	<0.0001	RM 1-way ANOVA	Tukey's	105.6	1.016, 63.01	11
5I inset	SOD1G93A/WT vs. SOD1G93A/mUbL	ns	0.7777	unpaired 2-tailed t-test	NA	0.2861	20	11
5J	SOD1G93A/WT vs. SOD1G93A/mUbL	****	<0.0001	RM 1-way ANOVA	Tukey's	73.24	1.019, 63.15	10, 12
5J inset	SOD1G93A/WT vs. SOD1G93A/mUbL	*	0.0497	unpaired 2-tailed t-test	NA	2.089	20	10, 12
5K	SOD1G93A/WT vs. SOD1G93A/mUbL	ns	0.71	Log-rank (MC) test	NA	0.1382	1	11
5L	SOD1G93A/WT vs. SOD1G93A/mUbL	ns	0.5107	Log-rank (MC) test	NA	0.4326	1	10, 12
NA	ALS4 vs. weight loss (male)	*	0.0137	2-sided Fisher's exact test	NA		1	11
NA	ALS4 vs. weight loss (female)	ns	0.1718	2-sided Fisher's exact test	NA		1	10, 12
6A	SOD1G93A/WT vs. SOD1G93A/mUbL (brain, sol)	ns	0.6084	unpaired 2-tailed t-test	NA	0.5289	10	6
	SOD1G93A/WT vs. SOD1G93A/mUbL (brain, insol)	*	0.0431	unpaired 2-tailed t-test	NA	2.315	10	6
	SOD1G93A/WT vs. SOD1G93A/mUbL (SC, sol)	ns	0.2807	unpaired 2-tailed t-test	NA	1.14	10	6
	SOD1G93A/WT vs. SOD1G93A/mUbL (SC, insol)	ns	0.2268	unpaired 2-tailed t-test	NA	1.288	10	6
6B	SOD1G93A/WT vs. SOD1G93A/mUbL (brain, sol)	ns	0.5609	unpaired 2-tailed t-test	NA	0.6016	10	6
	SOD1G93A/WT vs. SOD1G93A/mUbL (brain, insol)	*	0.0226	unpaired 2-tailed t-test	NA	2.692	10	6
	SOD1G93A/WT vs. SOD1G93A/mUbL (SC, sol)	ns	0.7389	unpaired 2-tailed t-test	NA	0.3428	10	6
	SOD1G93A/WT vs. SOD1G93A/mUbL (SC, insol)	ns	0.5012	unpaired 2-tailed t-test	NA	0.6977	10	6
6C	SOD1G93A/WT vs. SOD1G93A/mUbL (early)	*	0.0237	unpaired 2-tailed t-test	NA	2.664	10	6
	SOD1G93A/WT vs. SOD1G93A/mUbL (end)	*	0.0469	unpaired 2-tailed t-test	NA	2.106	22	12
6D	SOD1G93A/WT vs. SOD1G93A/mUbL (FI NMJs)	*	0.0372	unpaired 2-tailed t-test	NA	2.402	10	6
	SOD1G93A/WT vs. SOD1G93A/mUbL (PI NMJs)	ns	0.0614	unpaired 2-tailed t-test	NA	2.107	10	6
	SOD1G93A/WT vs. SOD1G93A/mUbL (DI NMJs)	*	0.0476	unpaired 2-tailed t-test	NA	2.258	10	6
S 1B	Control vs. BP 1	ns	0.9999	ordinary 1-way ANOVA	Tukey's	2.043	7, 16	3
	Control vs. BP 2	ns	>0.9999	ordinary 1-way ANOVA	Tukey's	2.043	7, 16	3
	Control vs. BP 3	ns	0.9995	ordinary 1-way ANOVA	Tukey's	2.043	7, 16	3
	Control vs. BP 4	ns	0.6251	ordinary 1-way ANOVA	Tukey's	2.043	7, 16	3
	Control vs. BP 5	ns	0.3398	ordinary 1-way ANOVA	Tukey's	2.043	7, 16	3
	Control vs. BP 6	ns	>0.9999	ordinary 1-way ANOVA	Tukey's	2.043	7, 16	3
	Control vs. BP 7	ns	>0.9999	ordinary 1-way ANOVA	Tukey's	2.043	7, 16	3
	BP 1 vs. BP 2	ns	0.9968	ordinary 1-way ANOVA	Tukey's	2.043	7, 16	3
	BP 1 vs. BP 3	ns	0.9823	ordinary 1-way ANOVA	Tukey's	2.043	7, 16	3
	BP 1 vs. BP 4	ns	0.8415	ordinary 1-way ANOVA	Tukey's	2.043	7, 16	3
	BP 1 vs. BP 5	ns	0.556	ordinary 1-way ANOVA	Tukey's	2.043	7, 16	3
	BP 1 vs. BP 6	ns	>0.9999	ordinary 1-way ANOVA	Tukey's	2.043	7, 16	3
	BP 1 vs. BP 7	ns	>0.9999	ordinary 1-way ANOVA	Tukey's	2.043	7, 16	3
	BP 2 vs. BP 3	ns	>0.9999	ordinary 1-way ANOVA	Tukey's	2.043	7, 16	3
	BP 2 vs. BP 4	ns	0.4671	ordinary 1-way ANOVA	Tukey's	2.043	7, 16	3
	BP 2 vs. BP 5	ns	0.2278	ordinary 1-way ANOVA	Tukey's	2.043	7, 16	3
	BP 2 vs. BP 6	ns	0.9997	ordinary 1-way ANOVA	Tukey's	2.043	7, 16	3
	BP 2 vs. BP 7	ns	>0.9999	ordinary 1-way ANOVA	Tukey's	2.043	7, 16	3
	BP 3 vs. BP 4	ns	0.3489	ordinary 1-way ANOVA	Tukey's	2.043	7, 16	3
	BP 3 vs. BP 5	ns	0.158	ordinary 1-way ANOVA	Tukey's	2.043	7, 16	3
	BP 3 vs. BP 6	ns	0.9963	ordinary 1-way ANOVA	Tukey's	2.043	7, 16	3
	BP 3 vs. BP 7	ns	0.9988	ordinary 1-way ANOVA	Tukey's	2.043	7, 16	3
	BP 4 vs. BP 5	ns	0.9994	ordinary 1-way ANOVA	Tukey's	2.043	7, 16	3
	BP 4 vs. BP 6	ns	0.7348	ordinary 1-way ANOVA	Tukey's	2.043	7, 16	3
	BP 4 vs. BP 7	ns	0.6684	ordinary 1-way ANOVA	Tukey's	2.043	7, 16	3
	BP 5 vs. BP 6	ns	0.4363	ordinary 1-way ANOVA	Tukey's	2.043	7, 16	3
	BP 5 vs. BP 7	ns	0.3756	ordinary 1-way ANOVA	Tukey's	2.043	7, 16	3
	BP 6 vs. BP 7	ns	>0.9999	ordinary 1-way ANOVA	Tukey's	2.043	7, 16	3
S 1C	Control vs. BP 1	ns	0.9972	ordinary 1-way ANOVA	Tukey's	0.9682	7, 23	4
	Control vs. BP 2	ns	>0.9999	ordinary 1-way ANOVA	Tukey's	0.9682	7, 23	4
	Control vs. BP 3	ns	>0.9999	ordinary 1-way ANOVA	Tukey's	0.9682	7, 23	4
	Control vs. BP 4	ns	0.9999	ordinary 1-way ANOVA	Tukey's	0.9682	7, 23	4
	Control vs. BP 5	ns	0.7341	ordinary 1-way ANOVA	Tukey's	0.9682	7, 23	4
	Control vs. BP 6	ns	>0.9999	ordinary 1-way ANOVA	Tukey's	0.9682	7, 23	4
	Control vs. BP 7	ns	>0.9999	ordinary 1-way ANOVA	Tukey's	0.9682	7, 23	4
	BP 1 vs. BP 2	ns	>0.9999	ordinary 1-way ANOVA	Tukey's	0.9682	7, 23	4
	BP 1 vs. BP 3	ns	0.9996	ordinary 1-way ANOVA	Tukey's	0.9682	7, 23	4
	BP 1 vs. BP 4	ns	0.9629	ordinary 1-way ANOVA	Tukey's	0.9682	7, 23	4
	BP 1 vs. BP 5	ns	0.4069	ordinary 1-way ANOVA	Tukey's	0.9682	7, 23	4
	BP 1 vs. BP 6	ns	0.9872	ordinary 1-way ANOVA	Tukey's	0.9682	7, 23	4
	BP 1 vs. BP 7	ns	>0.9999	ordinary 1-way ANOVA	Tukey's	0.9682	7, 23	4
	BP 2 vs. BP 3	ns	>0.9999	ordinary 1-way ANOVA	Tukey's	0.9682	7, 23	4
	BP 2 vs. BP 4	ns	0.995	ordinary 1-way ANOVA	Tukey's	0.9682	7, 23	4
	BP 2 vs. BP 5	ns	0.5359	ordinary 1-way ANOVA	Tukey's	0.9682	7, 23	4
	BP 2 vs. BP 6	ns	0.9993	ordinary 1-way ANOVA	Tukey's	0.9682	7, 23	4
	BP 2 vs. BP 7	ns	>0.9999	ordinary 1-way ANOVA	Tukey's	0.9682	7, 23	4
	BP 3 vs. BP 4	ns	0.9987	ordinary 1-way ANOVA	Tukey's	0.9682	7, 23	4
	BP 3 vs. BP 5	ns	0.6236	ordinary 1-way ANOVA	Tukey's	0.9682	7, 23	4
	BP 3 vs. BP 6	ns	>0.9999	ordinary 1-way ANOVA	Tukey's	0.9682	7, 23	4
	BP 3 vs. BP 7	ns	>0.9999	ordinary 1-way ANOVA	Tukey's	0.9682	7, 23	4
	BP 4 vs. BP 5	ns	0.9192	ordinary 1-way ANOVA	Tukey's	0.9682	7, 23	4
	BP 4 vs. BP 6	ns	>0.9999	ordinary 1-way ANOVA	Tukey's	0.9682	7, 23	4
	BP 4 vs. BP 7	ns	0.994	ordinary 1-way ANOVA	Tukey's	0.9682	7, 23	4
	BP 5 vs. BP 6	ns	0.8426	ordinary 1-way ANOVA	Tukey's	0.9682	7, 23	4
	BP 5 vs. BP 7	ns	0.5229	ordinary 1-way ANOVA	Tukey's	0.9682	7, 23	4
	BP 6 vs. BP 7	ns	0.9991	ordinary 1-way ANOVA	Tukey's	0.9682	7, 23	4
S 1E	Control vs. BP 1	ns	0.4679	RM 1-way ANOVA	Dunnett's	2.035	1.081, 2.162	3
	Control vs. BP 2	ns	0.2411	RM 1-way ANOVA	Dunnett's	2.035	1.081, 2.162	3
	Control vs. BP 3	ns	0.0533	RM 1-way ANOVA	Dunnett's	2.035	1.081, 2.162	3
	Control vs. BP 4	ns	0.173	RM 1-way ANOVA	Dunnett's	2.035	1.081, 2.162	3
	Control vs. BP 5	ns	0.5312	RM 1-way ANOVA	Dunnett's	2.035	1.081, 2.162	3
	Control vs. BP 6	ns	0.9999	RM 1-way ANOVA	Dunnett's	2.035	1.081, 2.162	3
	Control vs. BP 7	ns	>0.9999	RM 1-way ANOVA	Dunnett's	2.035	1.081, 2.162	3
	Control vs. Untransfected	ns	>0.9999	RM 1-way ANOVA	Dunnett's	2.035	1.081, 2.162	3
S 2A	Control BP vs. BP 1	****	<0.0001	RM 1-way ANOVA	Dunnet’s	43.62	1.704, 22.15	3
	Control BP vs. BP 2	****	<0.0001	RM 1-way ANOVA	Dunnet’s	43.62	1.704, 22.15	3
	Control BP vs. BP 3	****	<0.0001	RM 1-way ANOVA	Dunnet’s	43.62	1.704, 22.15	3
	Control BP vs. BP 4	****	<0.0001	RM 1-way ANOVA	Dunnet’s	43.62	1.704, 22.15	3
	Control BP vs. BP 5	****	<0.0001	RM 1-way ANOVA	Dunnet’s	43.62	1.704, 22.15	3
	Control BP vs. BP 6	****	<0.0001	RM 1-way ANOVA	Dunnet’s	43.62	1.704, 22.15	3
	Control BP vs. BP 7	****	<0.0001	RM 1-way ANOVA	Dunnet’s	43.62	1.704, 22.15	3
S 2B	Control BP vs. BP 1	****	<0.0001	ordinary 1-way ANOVA	Dunnet’s	11.46	7, 16	3
	Control BP vs. BP 2	****	<0.0001	ordinary 1-way ANOVA	Dunnet’s	11.46	7, 16	3
	Control BP vs. BP 3	****	<0.0001	ordinary 1-way ANOVA	Dunnet’s	11.46	7, 16	3
	Control BP vs. BP 4	**	0.0021	ordinary 1-way ANOVA	Dunnet’s	11.46	7, 16	3
	Control BP vs. BP 5	***	0.0001	ordinary 1-way ANOVA	Dunnet’s	11.46	7, 16	3
	Control BP vs. BP 6	****	<0.0001	ordinary 1-way ANOVA	Dunnet’s	11.46	7, 16	3
	Control BP vs. BP 7	****	<0.0001	ordinary 1-way ANOVA	Dunnet’s	11.46	7, 16	3
S 2C	Control BP vs. BP 1	****	<0.0001	RM 1-way ANOVA	Dunnet’s	90.57	1.976, 25.69	3
	Control BP vs. BP 2	****	<0.0001	RM 1-way ANOVA	Dunnet’s	90.57	1.976, 25.69	3
	Control BP vs. BP 3	****	<0.0001	RM 1-way ANOVA	Dunnet’s	90.57	1.976, 25.69	3
	Control BP vs. BP 4	****	<0.0001	RM 1-way ANOVA	Dunnet’s	90.57	1.976, 25.69	3
	Control BP vs. BP 5	****	<0.0001	RM 1-way ANOVA	Dunnet’s	90.57	1.976, 25.69	3
	Control BP vs. BP 6	****	<0.0001	RM 1-way ANOVA	Dunnet’s	90.57	1.976, 25.69	3
	Control BP vs. BP 7	****	<0.0001	RM 1-way ANOVA	Dunnet’s	90.57	1.976, 25.69	3
S 2D	Control BP vs. BP 1	*	0.0498	ordinary 1-way ANOVA	Dunnet’s	3.742	7, 16	3
	Control BP vs. BP 2	*	0.0218	ordinary 1-way ANOVA	Dunnet’s	3.742	7, 16	3
	Control BP vs. BP 3	*	0.0341	ordinary 1-way ANOVA	Dunnet’s	3.742	7, 16	3
	Control BP vs. BP 4	ns	>0.9999	ordinary 1-way ANOVA	Dunnet’s	3.742	7, 16	3
	Control BP vs. BP 5	ns	0.6615	ordinary 1-way ANOVA	Dunnet’s	3.742	7, 16	3
	Control BP vs. BP 6	ns	0.1218	ordinary 1-way ANOVA	Dunnet’s	3.742	7, 16	3
	Control BP vs. BP 7	ns	0.9769	ordinary 1-way ANOVA	Dunnet’s	3.742	7, 16	3
S 2E	Control BP vs. BP 1	**	0.0036	RM 1-way ANOVA	Dunnet’s	18.71	1.967, 27.54	3
	Control BP vs. BP 2	****	<0.0001	RM 1-way ANOVA	Dunnet’s	18.71	1.967, 27.54	3
	Control BP vs. BP 3	ns	0.4621	RM 1-way ANOVA	Dunnet’s	18.71	1.967, 27.54	3
	Control BP vs. BP 4	*	0.0353	RM 1-way ANOVA	Dunnet’s	18.71	1.967, 27.54	3
	Control BP vs. BP 5	ns	0.0704	RM 1-way ANOVA	Dunnet’s	18.71	1.967, 27.54	3
	Control BP vs. BP 6	***	0.0003	RM 1-way ANOVA	Dunnet’s	18.71	1.967, 27.54	3
S 2F	Control BP vs. BP 1	*	0.0311	RM 1-way ANOVA	Dunnet’s	3.903	6, 12	3
	Control BP vs. BP 2	**	0.0092	RM 1-way ANOVA	Dunnet’s	3.903	6, 12	3
	Control BP vs. BP 3	ns	0.5785	RM 1-way ANOVA	Dunnet’s	3.903	6, 12	3
	Control BP vs. BP 4	ns	0.2534	RM 1-way ANOVA	Dunnet’s	3.903	6, 12	3
	Control BP vs. BP 5	ns	0.2987	RM 1-way ANOVA	Dunnet’s	3.903	6, 12	3
	Control BP vs. BP 6	ns	0.9853	RM 1-way ANOVA	Dunnet’s	3.903	6, 12	3
S 2G	Control BP vs. BP 1	ns	0.1303	RM 1-way ANOVA	Dunnet’s	105	2.810, 36.53	3
	Control BP vs. BP 2	****	<0.0001	RM 1-way ANOVA	Dunnet’s	105	2.810, 36.53	3
	Control BP vs. BP 3	****	<0.0001	RM 1-way ANOVA	Dunnet’s	105	2.810, 36.53	3
	Control BP vs. BP 4	****	<0.0001	RM 1-way ANOVA	Dunnet’s	105	2.810, 36.53	3
	Control BP vs. BP 5	****	<0.0001	RM 1-way ANOVA	Dunnet’s	105	2.810, 36.53	3
	Control BP vs. BP 6	****	<0.0001	RM 1-way ANOVA	Dunnet’s	105	2.810, 36.53	3
S 2H	Control BP vs. BP 1	*	0.0125	RM 1-way ANOVA	Dunnet’s	5.503	6, 12	3
	Control BP vs. BP 2	*	0.0198	RM 1-way ANOVA	Dunnet’s	5.503	6, 12	3
	Control BP vs. BP 3	ns	0.0664	RM 1-way ANOVA	Dunnet’s	5.503	6, 12	3
	Control BP vs. BP 4	*	0.0192	RM 1-way ANOVA	Dunnet’s	5.503	6, 12	3
	Control BP vs. BP 5	ns	>0.9999	RM 1-way ANOVA	Dunnet’s	5.503	6, 12	3
	Control BP vs. BP 6	ns	0.3035	RM 1-way ANOVA	Dunnet’s	5.503	6, 12	3
S 3A	Control vs. CHIP	****	<0.0001	KW ANOVA	Dunn's	18061	8	2477-6326
	Control vs. UBE4A	****	<0.0001	KW ANOVA	Dunn's	18061	8	2477-6326
	Control vs. NEDD4L	****	<0.0001	KW ANOVA	Dunn's	18061	8	2477-6326
	Control vs. UBR5	****	<0.0001	KW ANOVA	Dunn's	18061	8	2477-6326
	Control vs. Parkin	***	0.0002	KW ANOVA	Dunn's	18061	8	2477-6326
	Control vs. UBOX5	****	<0.0001	KW ANOVA	Dunn's	18061	8	2477-6326
	Control vs. BTrCP	****	<0.0001	KW ANOVA	Dunn's	18061	8	2477-6326
	Control vs. RNF4	****	<0.0001	KW ANOVA	Dunn's	18061	8	2477-6326
S 3B	Control vs. CHIP	****	<0.0001	KW ANOVA	Dunn's	9915	8	2477-6326
	Control vs. UBE4A	****	<0.0001	KW ANOVA	Dunn's	9915	8	2477-6326
	Control vs. NEDD4L	****	<0.0001	KW ANOVA	Dunn's	9915	8	2477-6326
	Control vs. UBR5	****	<0.0001	KW ANOVA	Dunn's	9915	8	2477-6326
	Control vs. Parkin	****	<0.0001	KW ANOVA	Dunn's	9915	8	2477-6326
	Control vs. UBOX5	****	<0.0001	KW ANOVA	Dunn's	9915	8	2477-6326
	Control vs. BTrCP	**	0.0014	KW ANOVA	Dunn's	9915	8	2477-6326
	Control vs. RNF4	****	<0.0001	KW ANOVA	Dunn's	9915	8	2477-6326
S 3C	Control vs. CHIP	**	0.0065	ordinary 1-way ANOVA	Dunnett's	11.81	10, 20	3
	Control vs. UBE4A	*	0.0302	ordinary 1-way ANOVA	Dunnett's	11.81	10, 20	3
	Control vs. NEDD4L	ns	0.1066	ordinary 1-way ANOVA	Dunnett's	11.81	10, 20	3
	Control vs. UBR5	**	0.0039	ordinary 1-way ANOVA	Dunnett's	11.81	10, 20	3
	Control vs. Parkin	ns	0.1336	ordinary 1-way ANOVA	Dunnett's	11.81	10, 20	3
	Control vs. UBOX	ns	>0.9999	ordinary 1-way ANOVA	Dunnett's	11.81	10, 20	3
	Control vs. BTrCP	ns	0.975	ordinary 1-way ANOVA	Dunnett's	11.81	10, 20	3
	Control vs. RNF4	***	0.0002	ordinary 1-way ANOVA	Dunnett's	11.81	10, 20	3
S 3D	Control vs. CHIP	**	0.0054	ordinary 1-way ANOVA	Dunnett's	11.83	9, 19	3
	Control vs. UBE4A	**	0.0077	ordinary 1-way ANOVA	Dunnett's	11.83	9, 19	3
	Control vs. NEDD4L	ns	0.9895	ordinary 1-way ANOVA	Dunnett's	11.83	9, 19	3
	Control vs. UBR5	ns	0.6181	ordinary 1-way ANOVA	Dunnett's	11.83	9, 19	3
	Control vs. Parkin	*	0.0433	ordinary 1-way ANOVA	Dunnett's	11.83	9, 19	3
	Control vs. UBOX5	ns	0.3782	ordinary 1-way ANOVA	Dunnett's	11.83	9, 19	3
	Control vs. BTrCP	ns	0.0632	ordinary 1-way ANOVA	Dunnett's	11.83	9, 19	3
	Control vs. RNF4	ns	0.9737	ordinary 1-way ANOVA	Dunnett's	11.83	9, 19	3
S 3E	Control vs. CHIP	****	<0.0001	ordinary 1-way ANOVA	Dunnett's	29.11	9, 19	3
	Control vs. UBE4A	***	0.0009	ordinary 1-way ANOVA	Dunnett's	29.11	9, 19	3
	Control vs. NEDD4L	ns	>0.9999	ordinary 1-way ANOVA	Dunnett's	29.11	9, 19	3
	Control vs. UBR5	ns	0.9965	ordinary 1-way ANOVA	Dunnett's	29.11	9, 19	3
	Control vs. Parkin	***	0.0003	ordinary 1-way ANOVA	Dunnett's	29.11	9, 19	3
	Control vs. UBOX5	ns	0.0695	ordinary 1-way ANOVA	Dunnett's	29.11	9, 19	3
	Control vs. BTrCP	***	0.0003	ordinary 1-way ANOVA	Dunnett's	29.11	9, 19	3
	Control vs. RNF4	ns	0.8121	ordinary 1-way ANOVA	Dunnett's	29.11	9, 19	3
S 4A	WT/WT vs. WT/mUbL	****	<0.0001	RM 1-way ANOVA	Tukey's	54.14	1.017, 63.08	12
S 4B	WT/WT vs. WT/mUbL	****	<0.0001	RM 1-way ANOVA	Tukey's	71.07	1.006, 62.38	12
S 4C	WT/WT vs. WT/mUbL	ns	0.9796	RM 1-way ANOVA	Tukey's	39.56	1.456, 27.67	12
S 4D	WT/WT vs. WT/mUbL	ns	0.6104	RM 1-way ANOVA	Tukey's	173.3	1.666, 31.65	12
ALS, amyotrophic lateral sclerosis; ANOVA, analysis of variance; Baf, Bafilomycin; BP, BioPROTAC; βTrCP, beta-transducin repeat-containing protein; CHIP, C-terminus of Hsc70 interacting protein; DI NMJs, deinnervated neuromuscular junctions; EGFP, enhanced green fluorescent protein; FI NMJs, fully innervated neuromuscular junctions; Hsp70, heat shock protein 70; insol, insoluble; KW, Kruskal-Wall…
