# Supplementary material for: Development of a targeted BioPROTAC degrader selective for misfolded SOD1
Source: Research Square preprint supplement (doi:10.21203/rs.3.rs-6070925/v1), 2025-03-09
Supplement: Supplementary file 1 [file 53927cb8193055c69cdbbffe.pdf]

## Supplementary Information

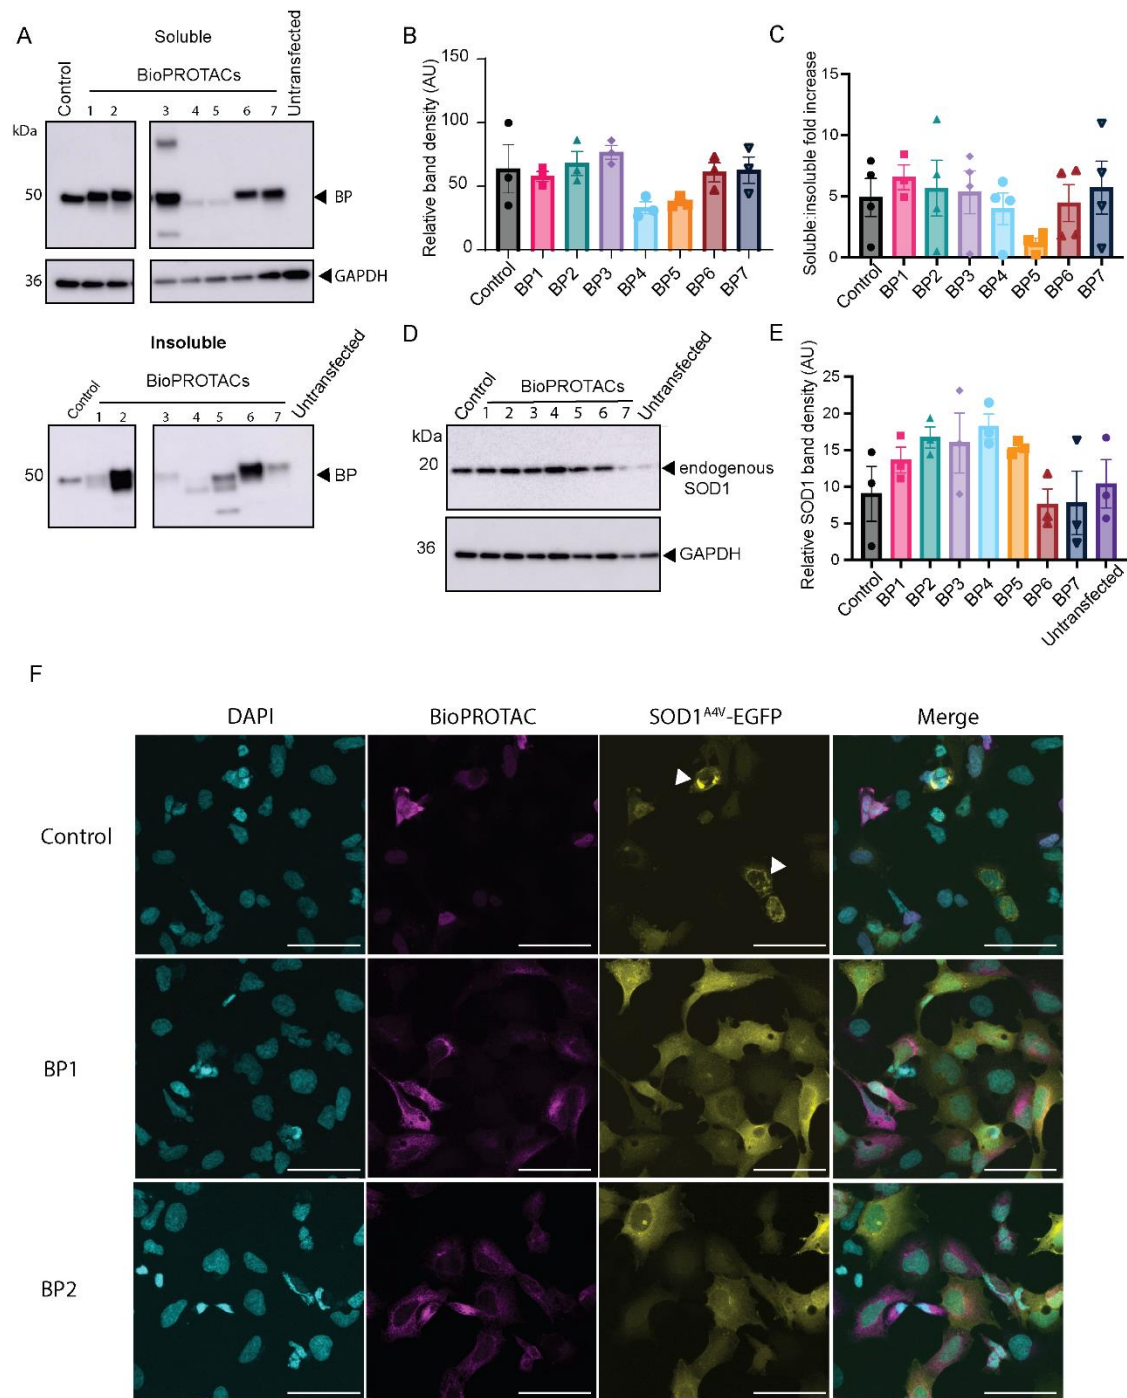

**Supplementary Figure 1. BioPROTACs are expressed in the soluble fraction of the nucleus and cytoplasm, and do not reduce endogenous SOD1. (A and B)** BioPROTAC expression was assessed in the soluble and insoluble fractions from HEK293 lysates. **(C)** Fold increase in expression of soluble to insoluble fraction was calculated for each BioPROTAC. **(D and E)** The soluble fraction was also assessed for SOD1 levels to determine effect on endogenous SOD1. **(F)** Immunocytochemistry was used to assess BioPROTAC expression levels. Representative images for BP1 and BP2 and the control in HEK293 cells transiently transfected to express BioPROTACs (magenta) and SOD1<sup>A4V</sup>-EGFP (yellow). Scale bars represent 50  $\mu$ m. White arrows show aggregates. For all graphs, bars represent mean  $\pm$  SEM. Statistical significance was determined using **(B and C)** ordinary one-way ANOVA paired with Tukey's multiple comparisons test or **(E)** repeated measures one-way ANOVA paired with Dunnett's multiple comparisons test. All statistical values are shown in Supplementary Table 2. Blots are representative from at least 3 independent experiments. Raw data and complete western blots and total protein images are shown in source data file.

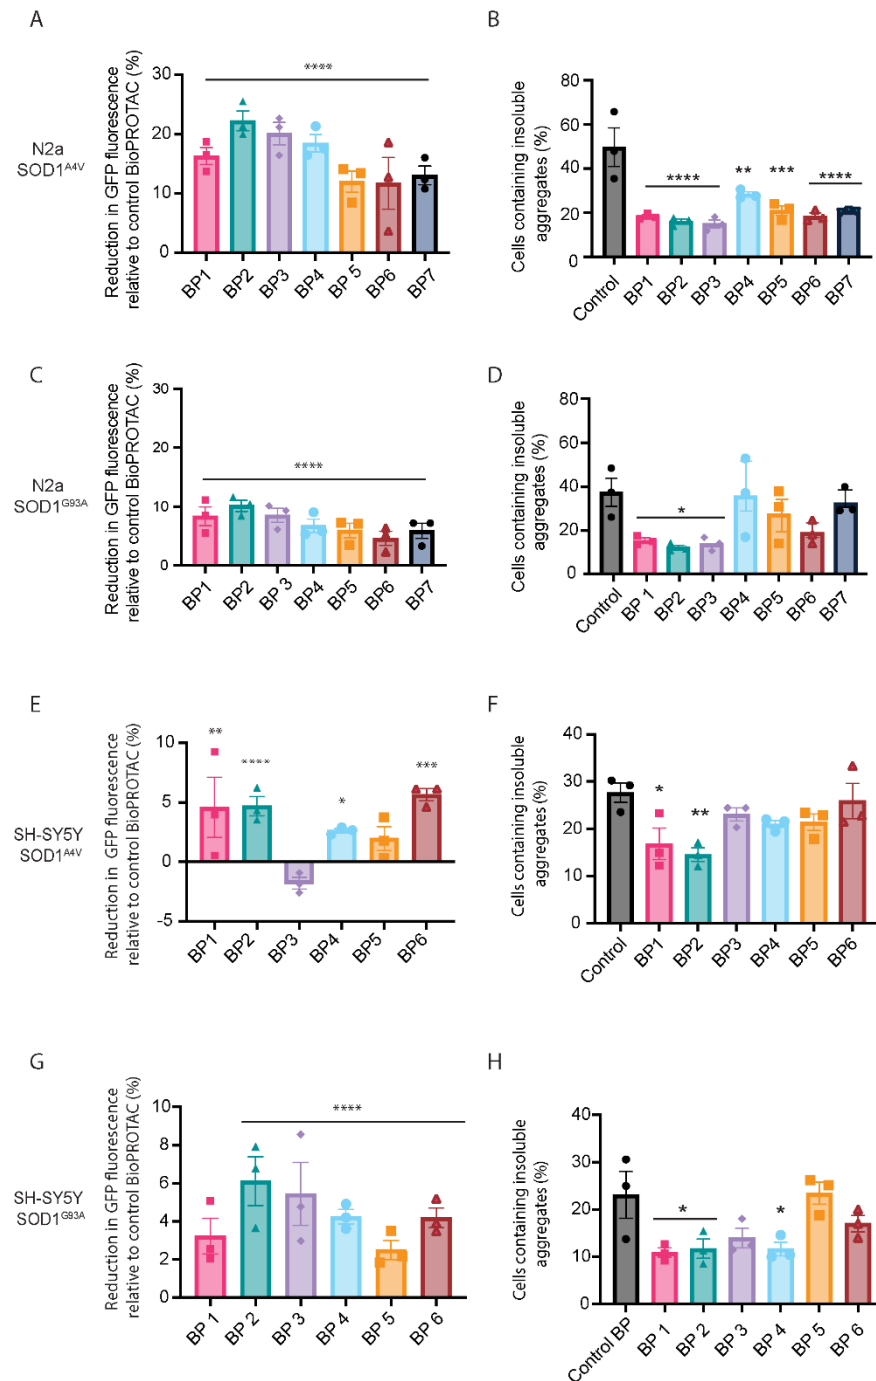

**Supplementary Figure 2. BioPROTACs degrade SOD1 variants in multiple cell types.** Total **(A)** SOD1<sup>A4V</sup>-EGFP and **(C)** SOD1<sup>G93A</sup>-EGFP fluorescence in Neuro2a cells expressing BioPROTACs relative to cells co-transfected with the control over 48 hr. The number of cells containing insoluble **(B)** SOD1<sup>A4V</sup>-EGFP and **(D)** SOD1<sup>G93A</sup>-EGFP aggregates in Neuro2a cells expressing BioPROTACs relative to cells co-transfected with the control was quantified using the saponin permeability assay. Total **(E)** SOD1<sup>A4V</sup>-EGFP and **(G)** SOD1<sup>G93A</sup>-EGFP fluorescence in SH-SY5Y cells expressing BioPROTACs relative to cells co-transfected with the control over 48 hr. The number of cells containing insoluble **(F)** SOD1<sup>A4V</sup>-EGFP and **(H)** SOD1<sup>G93A</sup>-EGFP aggregates in SH-SY5Y cells expressing BioPROTACs relative to cells co-transfected with the control was quantified using the saponin permeability assay. For all graphs, bars represent mean  $\pm$  SEM (\*  $P < 0.05$ , \*\*  $P < 0.01$ , \*\*\*  $P < 0.001$ , \*\*\*\*  $P < 0.0001$ ). Statistical significance was determined using **(A, C and E-H)** repeated measures or **(B and D)** ordinary one-way ANOVA paired with Dunnett's multiple comparisons test. All statistical values are shown in Supplementary Table 2. Raw data are shown in source data file.

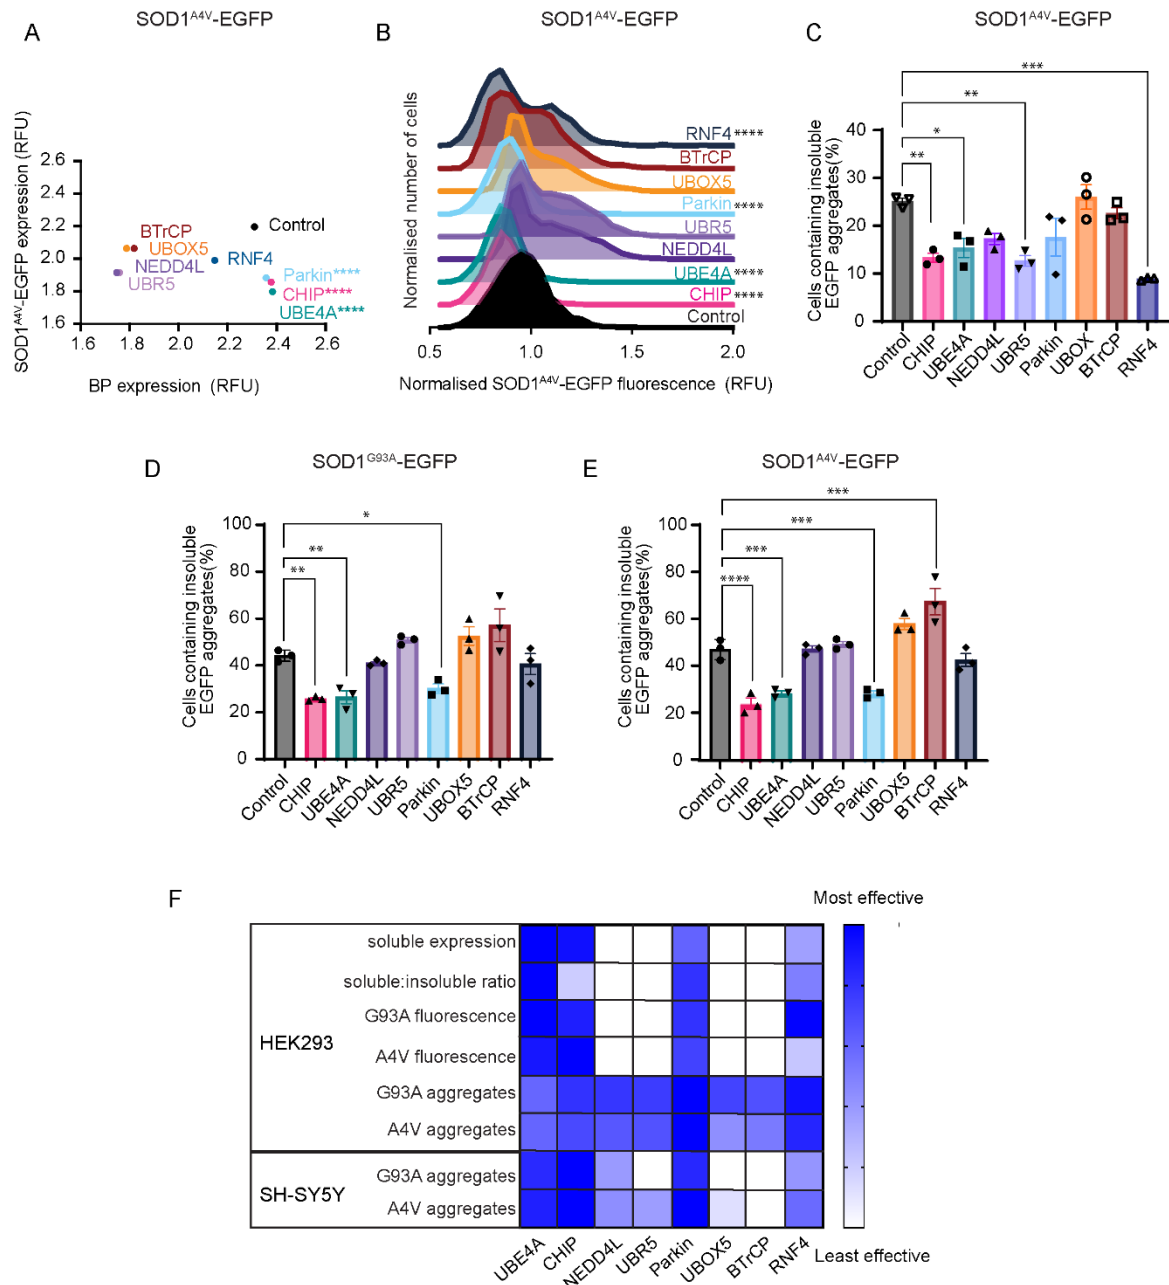

**Supplementary Figure 3. Reduction of misfolded SOD1 is ligase dependent and consistent across cell lines and SOD1 mutants.** (A) Immunocytochemistry was used to assess BioPROTAC and SOD1<sup>A4V</sup>-EGFP expression in HEK293 cells. (B) The reduction in SOD1<sup>A4V</sup>-EGFP fluorescence compared to control was determined when expression levels of the BioPROTACs were normalised. (C) The number of cells containing insoluble SOD1<sup>A4V</sup>-EGFP aggregates in HEK293 cells expressing BioPROTACs relative to cells co-transfected with the control was quantified using the saponin permeability assay. (D) The number of cells containing insoluble SOD1<sup>G93A</sup>-EGFP aggregates in SH-SY5Y cells expressing BioPROTACs relative to cells co-transfected with the control. (E) The number of cells containing insoluble SOD1<sup>A4V</sup>-EGFP aggregates in SH-SY5Y cells expressing BioPROTACs relative to cells co-transfected with the control. (F) A weighted heat map comparing the relative efficacy of BioPROTACs in the various assays. For all graphs, bars represent mean  $\pm$  SEM (\*  $P < 0.05$ , \*\*  $P < 0.01$ , \*\*\*  $P < 0.001$ , \*\*\*\*  $P < 0.0001$ ). Statistical significance was determined using (A and B) Kruskal-Wallis one-way ANOVA paired with Dunn's multiple comparisons test or (C-E) ordinary one-way ANOVA paired with Dunnett's multiple comparisons test. All statistical and error values are shown in Supplementary Table 2 and 3, respectively. Raw data are shown in source data file.

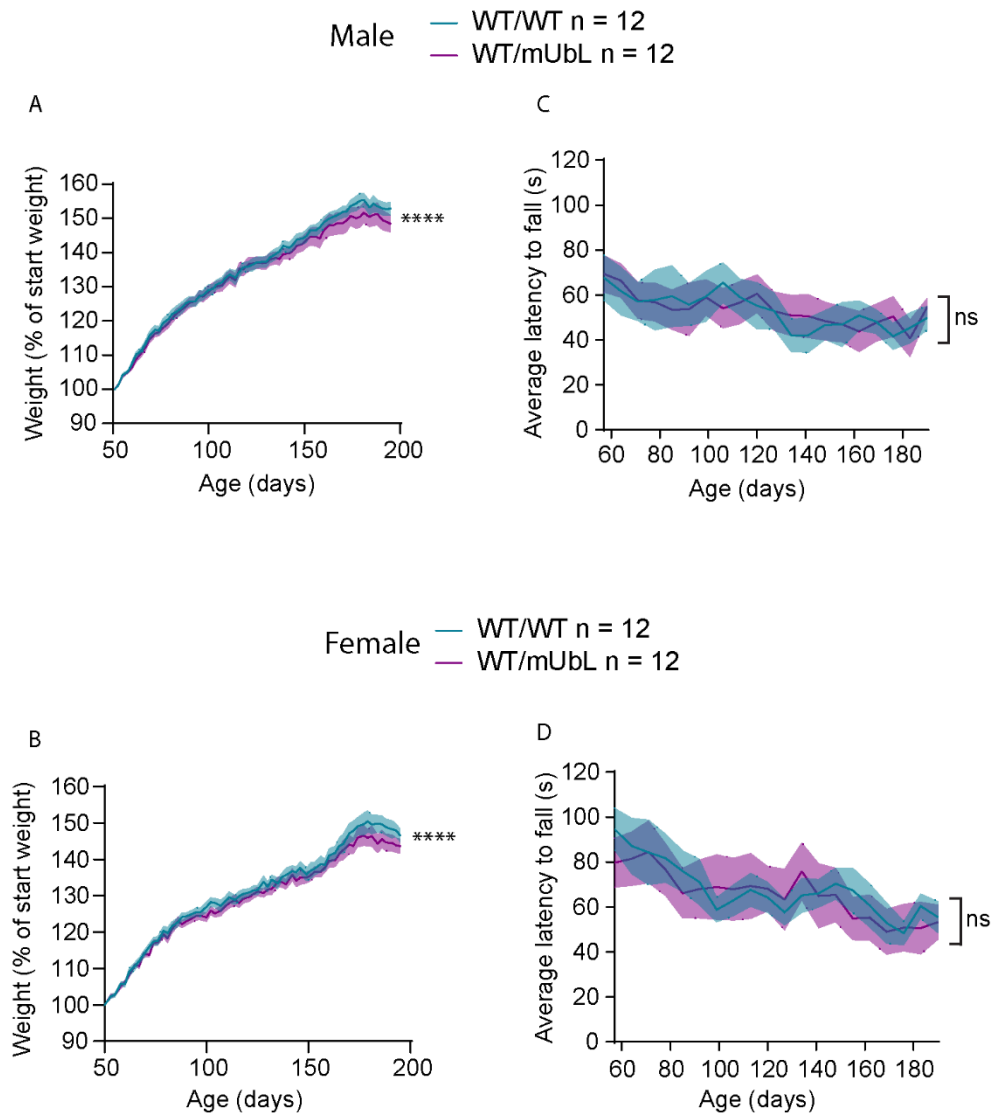

**Supplementary Figure 4. Phenotypic differences across the lifespan of non-transgenic WT/WT and WT/misfoldUbl mice.** (A-D) Phenotypic data comparing WT/WT (n = 12 male and n = 12 female) and WT/MisfoldUbl control mice (n = 12 male and n = 12 female) are shown. Control groups were obtained as described in Figure 5D. Male and female mice were assessed for (A and B) weight gain and (C and D) motor function via latency to fall on the rotarod. Results represent mean  $\pm$  SEM (shading) (\*\*\*\*  $P < 0.0001$ ). (A-D) Statistical significance was determined using repeated measures one-way ANOVA paired with Tukey's multiple comparisons test. All statistical values are shown in Supplementary Table 2. Raw data are shown in source data file.

**Supplementary Table 1.** Antibodies used to investigate Development of a targeted BioPROTAC degrader selective for misfolded SOD1

| Antibody                             | Conjugate       | Antibody type | Company                  | Catalogue number | Dilution | Clonality  | Application                                 |
|--------------------------------------|-----------------|---------------|--------------------------|------------------|----------|------------|---------------------------------------------|
| anti-6X His                          | -               | primary       | Abcam                    | ab18184          | 1:1,000  | monoclonal | immunocytochemistry, co-immunoprecipitation |
| anti-mouse IgG                       | Alexa Fluor 647 | secondary     | Abcam                    | ab150115         | 1:1,000  | polyclonal | immunocytochemistry                         |
| anti-FLAG                            | -               | primary       | Sigma                    | F1804            | 1:1,000  | monoclonal | immunoblotting                              |
| anti-6X His                          | -               | primary       | Abcam                    | ab9108           | 1:1,000  | polyclonal | immunoblotting                              |
| anti-SOD1                            | -               | primary       | Abcam                    | ab13498          | 1:5,000  | polyclonal | immunoblotting                              |
| anti-GAPDH                           | -               | primary       | Sigma                    | G8795            | 1:5,000  | monoclonal | immunoblotting                              |
| anti-Hsp70                           | -               | primary       | Abcam                    | ab47455          | 1:1,000  | monoclonal | immunoblotting                              |
| anti-mouse IgG                       | HRP             | secondary     | Agilent                  | P044701-2        | 1:1,000  | polyclonal | immunoblotting                              |
| anti-rabbit IgG                      | HRP             | secondary     | Agilent                  | P044801-2        | 1:1,000  | polyclonal | immunoblotting                              |
| anti-synaptophysin                   | -               | primary       | Abcam                    | ab32594          | 1:800    | polyclonal | NMJ immunostaining                          |
| anti-neurofilament heavy polypeptide | -               | primary       | Abcam                    | ab8135           | 1:1,000  | polyclonal | NMJ immunostaining                          |
| anti-rabbit IgG                      | Alexa Fluor 647 | secondary     | Abcam                    | ab150079         | 1:500    | polyclonal | NMJ immunostaining                          |
| alpha-bungarotoxin                   | Alexa Fluor 488 | secondary     | Thermo Fisher Scientific | B13422           | 1:2,000  | -          | NMJ immunostaining                          |

GAPDH, glyceraldehyde 3-phosphate dehydrogenase; His, histidine; HRP, horseradish peroxidase; Hsp70, heat shock protein 70; IgG, immunoglobulin G; NMJ, neuromuscular junction; SOD1, superoxide dismutase 1.

**Supplementary Table 3.** Descriptive statistics for Figure 2E, Figure 3D and Supplementary Figure 3A

| Figure and Panel       | Sample     | BP expression (RFU) |       |       | SOD1-EGFP expression (RFU) |       |       |
|------------------------|------------|---------------------|-------|-------|----------------------------|-------|-------|
|                        |            | <i>n</i>            | Mean  | SEM   | <i>n</i>                   | Mean  | SEM   |
| <b>Figure 2E</b>       | Control BP | 3445                | 1     | 0.012 | 3445                       | 64.55 | 0.922 |
|                        | BP 1       | 2420                | 1.322 | 0.018 | 2420                       | 27.3  | 0.406 |
|                        | BP 2       | 3429                | 0.905 | 0.009 | 2665                       | 13.97 | 0.125 |
|                        | BP 3       | 1867                | 8.452 | 0.192 | 1867                       | 4.633 | 0.053 |
|                        | BP 4       | 2665                | 3.722 | 0.048 | 3429                       | 47.1  | 0.47  |
|                        | BP 5       | 3169                | 2.126 | 0.027 | 3169                       | 23.13 | 0.221 |
|                        | BP 6       | 2830                | 1.002 | 0.013 | 2830                       | 42.79 | 0.449 |
|                        | BP 7       | 3304                | 1.279 | 0.014 | 3304                       | 52.23 | 0.587 |
| <b>Figure 3D</b>       | Control    | 2565                | 2.311 | 0.007 | 2565                       | 2.056 | 0.002 |
|                        | CHIP       | 3069                | 2.374 | 0.005 | 3069                       | 1.821 | 0.002 |
|                        | UBE4A      | 2911                | 2.385 | 0.005 | 2911                       | 1.853 | 0.002 |
|                        | NEDD4L     | 6408                | 1.757 | 0.002 | 6408                       | 2.346 | 0.002 |
|                        | UBR5       | 6216                | 1.766 | 0.002 | 6216                       | 2.367 | 0.002 |
|                        | Parkin     | 2945                | 2.372 | 0.006 | 2945                       | 1.876 | 0.002 |
|                        | UBOX5      | 5593                | 1.822 | 0.002 | 5593                       | 2.381 | 0.002 |
|                        | βTrCP      | 3044                | 1.85  | 0.006 | 3044                       | 2.175 | 0.003 |
|                        | RNF4       | 3204                | 2.333 | 0.005 | 3204                       | 1.828 | 0.002 |
| <b>Supp. Figure 3A</b> | Control    | 2477                | 2.31  | 0.007 | 2477                       | 2.196 | 0.008 |
|                        | CHIP       | 2806                | 2.379 | 0.005 | 5960                       | 1.857 | 0.004 |
|                        | UBE4A      | 3073                | 2.384 | 0.005 | 3729                       | 1.799 | 0.008 |
|                        | NEDD4L     | 6326                | 1.747 | 0.002 | 5901                       | 1.915 | 0.005 |
|                        | UBR5       | 5901                | 1.759 | 0.003 | 2943                       | 1.99  | 0.006 |
|                        | Parkin     | 3051                | 2.357 | 0.005 | 6326                       | 1.883 | 0.005 |
|                        | UBOX5      | 5960                | 1.787 | 0.002 | 3073                       | 2.065 | 0.006 |
|                        | BTrCP      | 3729                | 1.819 | 0.005 | 2806                       | 2.074 | 0.006 |
|                        | RNF4       | 2943                | 2.148 | 0.007 | 6147                       | 1.985 | 0.005 |

BP, BioPROTAC; βTrCP, beta-transducin repeat-containing protein; CHIP, C-terminus of Hsc70 interacting protein; N, sample size; NEDD4L, neural precursor cell expressed developmentally downregulated 4-like; RNF4, RING finger protein 4; RFU, relative fluorescence units; SEM, standard error of the mean; SOD1-EGFP, superoxide dismutase 1-enhanced green fluorescent protein; Supp., supplementary; UBE4A, ubiquitination factor E4A; UBOX5, U-Box domain containing 5; UBR5, ubiquitin protein ligase E3 component N-recogin 5.

**Supplementary Video 1:** SOD1<sup>G93A</sup>/mUbl mouse at 182 days and end-stage due to 20% weight loss criteria.

**Supplementary Video 2:** SOD1<sup>G93A</sup>/WT mouse at 174 days and end-stage due to reaching a neurological score of 4.
