# Supplementary material for: Development of a targeted BioPROTAC degrader selective for misfolded SOD1
Source: Research Square preprint supplement (doi:10.21203/rs.3.rs-6070925/v1), 2025-03-09
Supplement: Supplementary file 2 [file d1d3735d931a728482e584c0.xlsx]

## Sheet: Figure 2
Figure 2A	BP 1	BP 2	BP 3	BP 4	BP 5	BP 6	BP 7
	32.7891	42.8669	18.7366	25.25	16.1467	26.5835	4.14565
	28.4298	35.892	22.6344	30.9685	17.3775	35.6355	-0.16241
	29.8658	36.892	16.0697	21.1728	18.3776	29.9171	0.042739
Figure 2B	BP1	BP2	BP3	BP4	BP5	BP6	BP7
	7.02564	-2.4359	-4.84615	8.82051	6.84615	2.46154	-2.64103
	3.02564	2.4359	-3.84615	6.82051	4.84615	2.06154	-1.64103
	4.02564	3.4359	-1.84615	5.82051	7.84615	2.96154	-3.64103
Figure 2D	BP 1	BP 2	BP 3	BP 4	BP 5	BP 6	BP 7
	35.2113	64.7887	87.3239	53.5211	57.7465	73.2394	61.9718
	29.4118	47.0588	79.4118	38.2353	-8.82353	47.0588	11.7647
	27.0588	76.4706	83.5294	74.1176	-1.17647	67.0588	62.3529
	6.87362	81.3347	70.9475	41.7278	-20.5869	79.9651	42.26
	76.8356	90.5067	86.9423	61.5874	3.58506	88.143	37.9158
	44.5689	78.4116	86.1742	42.135	-10.8115	56.3277	6.77169
	22.2986	72.0588	50.1732	50.6596	54.0345	82.6035	6.02001
	3.18225	74.4047	48.7373	48.8328	20.9151	59.0517	29.7732
	19.1922	71.3704	67.9434	62.1838	49.0212	79.3151	16.4524
Figure 2E		BioPROTAC expression	GFP intensity
	Control	1	64.55
	BP 1	1.3224	27.3032
	BP 2	0.905346	13.9721
	BP 3	8.45177	4.63344
	BP 4	3.7221	47.1018
	BP 5	2.12642	23.1323
	BP 6	1.00191	42.79
	BP 7	1.27932	52.2283
Figure 2F	Control BP	BP 1	BP 2	BP 3	BP 4	BP 5	BP 6	BP 7
	32.6772	20.5919	11.9206	3.25163	42.2479	15.0381	34.3629	54.8733
	41.2936	24.8339	18.2361	3.88099	30.336	15.3154	41.6602	99.1587
	57.0891	29.1988	14.4545	4.57271	36.3474	24.2484	32.8568	78.5272
	58.2458	21.382	20.5316	4.84142	31.1498	20.9345	49.5388	63.1393
	39.5624	27.1331	16.0681	6.84842	30.3165	13.0899	35.9418	91.1407
	59.9656	30.3375	13.0545	4.85008	45.7245	18.0814	40.2043	44.113
	43.4161	24.2154	12.0199	6.23892	33.6624	20.3523	42.8292	39.5255
	53.5963	17.7452	18.0413	5.22695	23.8703	14.0623	55.6061	52.2406
	101.271	34.2285	16.2463	2.97052	27.6363	33.8991	40.6907	87.4864
	32.3995	17.1334	13.1854	2.80963	50.0914	22.3845	30.0716	36.2776
	78.43	16.7113	12.0178	3.8529	41.4792	23.2364	33.6892	38.0929
	91.8135	20.2543	12.5193	4.25043	33.4979	31.619	41.9522	122.781
	42.2368	38.3756	14.5793	4.62227	44.8775	14.2805	27.3097	57.7826
	42.3113	19.8078	15.8935	4.13754	28.0606	18.4982	32.031	236.165
	88.1037	23.8909	19.8573	6.91328	35.4906	16.2694	33.1598	38.654
	31.303	28.5093	16.6158	3.65293	47.6929	17.237	53.425	54.6994
	28.2708	20.9085	19.5649	5.30163	30.7383	20.2354	30.8752	52.491
	60.2117	60.61	12.6137	3.61613	45.2573	20.3277	46.8843	50.3252
	40.2688	23.9912	13.1746	2.4061	36.3595	20.8851	29.8207	42.3983
	39.335	35.6858	10.694	4.69898	48.1903	23.4652	54.9687	34.0554
	26.7258	18.9011	14.3272	3.40961	42.5413	18.767	40.3553	63.6241
	40.7668	21.6654	17.671	5.38448	59.9027	28.9202	71.1893	55.092
	79.5322	25.0791	18.662	3.24348	39.5023	15.0911	37.8903	68.4085
	88.2622	41.0337	14.9487	4.75712	30.9256	11.3754	54.0391	50.9049
	28.647	24.9013	16.323	4.11431	31.2789	15.8164	48.0367	51.4991
	26.3721	43.1795	18.5371	5.4967	49.5434	21.7185	51.0039	122.975
	67.1494	27.3749	14.6726	3.66361	29.555	17.489	43.4754	46.2481
	35.7505	21.4178	23.4451	4.41401	31.8193	21.1834	38.5109	111.574
	61.9161	38.2429	15.4781	4.42898	41.1559	43.5756	37.9778	31.0094
	50.4186	21.1271	11.795	6.71155	43.0641	28.7402	47.9494	55.455
	53.2672	21.037	11.7724	3.10802	83.543	26.8193	35.8645	67.3322
	60.3474	39.3157	16.0706	3.27296	32.6911	14.2427	44.1689	62.4069
	57.5029	19.8092	15.7091	12.7424	50.0425	15.0705	37.8193	52.1527
	48.6864	20.75	20.9777	3.67256	31.5884	10.0878	44.0485	66.318
	50.0868	18.9377	17.9677	4.90527	35.04	13.3797	37.0839	45.7101
	38.9186	22.198	14.7392	9.20501	104.271	40.1144	61.0864	68.3175
	33.0914	18.8007	12.1891	2.76874	37.2532	30.9454	32.2493	51.8126
	40.1065	91.8359	17.2935	4.54817	35.2461	24.6929	43.523	66.8401
	32.0338	24.8105	8.44697	5.14459	31.4589	39.2958	31.0925	49.3756
	76.9134	20.6013	13.737	4.75035	39.4297	23.1518	45.8027	53.3888
	37.4334	90.3669	12.8638	5.91142	57.1983	12.8446	37.2619	63.5297
	26.0282	41.9937	13.669	3.64991	35.1025	17.4923	45.0356	57.6266
	36.6083	44.8255	10.6607	4.56142	30.6246	29.4699	34.3891	65.6886
	82.6209	19.6484	19.4071	8.22487	28.9262	17.2979	32.3568	54.1737
	42.8462	15.5899	14.6066	4.59431	66.6087	9.56233	41.1921	74.9728
	44.7407	25.5486	14.8839	4.64298	34.1247	44.0937	39.2603	70.3758
	49.7477	35.8203	13.4092	4.87602	35.6428	14.3605	41.4661	40.4752
	46.2433	24.6838	12.4082	2.91747	33.9416	36.0415	39.6431	41.5564
	41.5674	22.0053	13.2454	3.61104	56.1122	18.1315	71.9223	58.749
	94.5939	24.3278	13.5601	3.46542	49.1724	19.9951	29.36	32.6179
	42.1885	20.3157	18.2439	5.22445	38.161	14.9976	29.9679	68.7238
	70.411	19.5564	17.123	4.83679	42.6279	25.3403	37.3914	48.5243
	40.3936	20.3824	15.2572	5.48805	44.3484	20.8534	41.9425	38.6893
	39.3548	21.0624	14.3892	4.06569	28.3295	16.1314	39.8552	68.777
	98.8633	27.5728	14.9455	3.04158	35.4994	16.7212	38.0472	68.7666
	40.6961	17.3963	13.5479	4.60125	32.1371	27.2022	50.0791	56.3857
	71.4385	25.3801	22.3643	5.19701	39.8068	30.1647	24.8284	41.5225
	143.449	15.3076	16.8604	3.10079	37.1406	15.0895	45.7738	59.3236
	70.4479	17.6919	13.8977	3.71986	35.5196	22.0995	37.26	70.6298
	34.4274	22.3121	15.7399	3.64183	34.0136	21.9479	37.3362	69.0908
	39.591	14.9059	15.5804	3.84837	31.636	16.0759	71.8642	37.8332
	34.6901	16.0878	16.0895	3.23582	32.4694	11.5691	32.1665	39.9501
	60.6902	26.2	13.7732	2.10021	41.1199	20.6918	58.8143	60.2396
	57.1272	36.6731	12.8887	2.94656	34.2374	17.1448	44.6285	57.2163
	75.9565	32.1909	17.9289	4.83476	31.6163	17.6551	28.0233	47.4698
	56.8292	51.9659	11.0181	2.56574	36.5092	15.9022	28.1099	55.5306
	53.8348	21.8742	17.1564	4.46528	33.7939	17.0078	44.1532	56.2364
	40.6441	18.2071	13.3417	1.70651	35.1483	14.7218	48.8013	44.25
	51.4419	260.064	16.254	3.45769	101.041	16.3939	27.9002	48.2943
	51.0442	19.9863	11.4637	3.71342	29.0621	16.2234	40.2912	59.8942
	65.2359	16.9596	15.5425	4.76491	35.7339	85.6456	34.9567	57.4187
	66.8235	30.249	16.3571	3.20025	37.7247	27.4707	65.6926	63.5074
	68.1128	24.7084	14.5138	4.00417	51.1743	19.8115	37.3088	57.261
	92.6286	17.0518	14.0132	4.48625	33.3429	14.9974	50.6687	38.9433
	44.4322	19.5522	12.9405	7.82516	45.3471	14.6551	38.6162	54.6629
	68.3529	19.338	24.7162	5.45259	35.2503	16.2862	84.5773	51.6011
	40.1177	16.5199	17.2553	3.25101	39.9995	32.8156	56.0521	46.5557
	38.173	19.6279	11.6492	3.98696	33.413	33.3908	36.5953	38.4624
	41.7069	16.7938	12.0134	3.02677	34.9639	35.88	47.6282	63.2157
	30.9793	85.3745	35.5147	3.51912	32.8866	23.9486	156.485	41.9511
	66.9608	27.0378	15.4793	3.25431	56.9921	32.2451	33.8381	50.4072
	35.1193	19.0478	22.0906	3.75791	33.851	22.6768	52.302	35.4815
	56.2298	21.6459	10.9843	3.99291	36.5631	18.2481	60.0682	45.5273
	61.5502	14.6303	14.326	5.12344	29.8916	24.2624	28.0761	83.4715
	33.967	34.7141	14.7282	2.4338	31.1677	24.2315	28.4581	78.487
	42.2595	19.8164	11.8944	5.52453	40.8126	23.4675	32.4129	41.0833
	48.2399	20.8492	14.6616	2.50231	45.343	38.1538	22.4349	56.3954
	72.9351	48.3614	19.8692	4.78307	35.6835	21.1449	51.0854	38.627
	65.6418	56.4822	13.3553	1.7005	39.2427	14.3631	39.5132	39.9803
	42.8096	22.6324	17.3603	4.98164	33.9133	22.7434	38.8568	43.7708
	47.4075	24.4054	13.2656	5.31609	38.5182	74.6114	43.3221	60.2205
	27.5751	14.2505	23.8575	5.65089	31.8714	25.63	79.5929	53.3602
	50.2069	25.3509	14.913	3.95747	33.2097	36.8852	90.3071	45.2654
	35.9506	30.3435	15.1304	4.69879	37.5466	29.8213	26.1942	54.1416
	55.901	30.6726	26.1914	4.80927	33.6322	35.5263	30.7767	45.4782
	79.1811	23.5671	11.8421	4.89447	30.6675	23.2453	49.5898	37.9752
	87.9899	28.9279	16.5952	3.64297	31.0624	19.3252	126.271	45.3406
	44.7783	24.1462	14.1207	20.4668	31.9774	35.1983	31.9519	60.5421
	26.4356	30.0054	26.0786	5.00631	59.9051	16.5634	31.5985	30.86
	50.7776	19.7031	18.6812	4.46465	37.1283	16.645	45.1044	44.0799
	37.9513	22.8361	16.1404	4.38381	29.6016	20.8507	37.5004	49.4083
	55.6801	15.0611	61.7406	5.46391	39.1601	14.7756	31.887	60.6803
	67.214	74.9684	18.5069	7.93056	32.3813	20.8452	37.4072	59.2007
	43.2775	26.9852	15.7978	4.04037	38.2984	31.5517	44.2158	46.4927
	55.6695	28.117	10.9398	7.73892	34.8291	31.2227	48.9718	43.5685
	56.1564	16.4177	23.1037	4.33541	39.212	20.9084	36.0815	42.0181
	42.1989	28.9979	16.465	8.91525	29.4522	20.9738	60.987	59.3331
	52.8629	25.1706	22.4767	5.14261	38.9235	19.9723	81.5975	61.7213
	80.0378	21.3188	10.4618	5.19169	35.8923	23.5365	35.6647	71.1279
	41.5775	15.4963	14.5981	5.75433	31.5236	23.438	49.9094	44.6713
	76.5336	71.1329	15.3653	5.04887	32.5096	17.9398	29.5732	51.4695
	139.272	19.7211	17.946	2.89962	40.9913	24.4402	54.492	39.9955
	72.7029	24.842	14.7361	4.13974	34.5284	19.8126	410.768	48.4282
	49.9385	17.0053	13.6075	5.06822	36.0753	27.5423	39.4226	50.2283
	64.646	33.0641	13.7286	1.64829	42.8864	21.7586	27.1918	46.3274
	38.0666	19.2297	17.0361	4.69924	35.2035	9.61116	33.6438	46.1242
	74.5063	15.089	21.2632	3.1757	40.9564	15.5881	62.1963	43.3998
	72.5858	15.9815	16.5337	4.65144	43.1137	13.8502	51.4945	55.057
	41.0692	35.2314	23.9071	3.57737	39.508	19.5393	35.4161	45.469
	59.2288	15.4573	14.1483	5.3552	48.6746	18.2892	43.2108	55.1851
	74.4962	20.4117	16.1604	5.03086	39.1268	14.5815	39.4829	38.2152
	39.8865	70.9509	12.4822	3.22706	28.986	17.8076	28.5338	58.9666
	58.3733	15.2091	15.349	4.91101	32.8822	21.9234	40.5494	52.3978
	87.8273	15.6213	16.6176	3.30532	39.8473	24.5043	49.0244	48.5974
	60.0037	14.5188	13.8476	4.85464	41.5517	17.4361	53.6272	54.4329
	42.2283	20.6673	15.9852	5.86861	36.8584	18.1763	42.2415	98.6616
	67.0968	71.2542	14.5772	3.65784	34.6978	19.9169	37.3253	42.8035
	75.4586	23.4427	15.4035	4.42781	33.3513	15.804	47.2885	37.5249
	49.2547	22.9348	16.9198	3.54348	29.5586	21.7002	67.6565	53.07
	63.6696	25.9089	14.9832	3.02328	38.8142	20.3376	37.6533	44.486
	72.0929	21.4131	19.4241	4.60868	54.7714	22.8664	47.6479	49.2886
	86.6358	14.7384	12.8487	5.85778	39.5458	19.8924	39.75	48.0183
	127.624	20.0078	25.3692	6.46015	28.3282	53.7269	31.3671	47.4347
	65.2201	47.2733	15.3964	6.83806	35.692	19.3277	36.2808	132.778
	49.1597	25.6358	17.3156	3.08666	39.6594	28.4081	52.6299	47.2913
	40.9829	27.3345	14.1457	3.74173	33.6594	21.2035	31.8262	43.6631
	42.723	22.0933	19.1938	3.58427	31.6283	28.8893	69.4216	42.9786
	49.3433	35.205	14.9551	4.25625	49.1786	22.8554	52.2262	42.9043
	49.9557	22.6498	14.821	5.49654	34.1115	20.3637	31.2427	40.8243
	38.7383	14.4712	15.3676	3.40225	29.2123	18.3634	41.8651	41.7966
	111.453	26.221	18.7274	4.4982	36.515	29.4954	36.2513	56.6905
	50.0634	22.2297	11.5961	4.4162	34.5873	41.8581	48.0351	48.7659
	48.1652	30.352	17.6155	2.76463	30.7891	17.7074	37.1621	54.5668
	47.9235	26.956	12.5935	3.3822	31.6681	24.0699	46.8217	64.3852
	28.0823	19.1205	22.3028	5.18814	36.979	20.407	36.3485	71.553
	59.7285	21.2144	10.3768	4.52634	40.6494	28.9097	114.586	45.7299
	70.8619	20.3463	16.3755	3.80531	39.3874	17.4072	27.4159	61.0478
	41.3456	22.3203	11.4039	3.23927	28.7252	24.2025	43.0251	65.8356
	35.043	26.5209	16.4824	4.64247	36.2016	22.2591	57.639	53.3365
	31.7171	21.3345	15.343	4.18824	45.2588	36.5179	34.8204	62.6123
	38.8392	20.7805	14.5091	5.17139	45.2237	26.8052	30.9235	46.1259
	47.6736	18.1656	17.1764	14.8759	34.0673	17.3953	29.4398	59.9036
	43.1885	26.2687	14.4612	4.90469	47.1985	17.7768	60.8014	57.6046
	55.4642	36.3394	15.4871	5.22586	41.7736	18.3509	31.3918	71.2
	58.9116	41.3278	12.9333	7.86621	38.039	19.675	44.3996	72.9691
	44.6049	17.4408	24.5212	4.83429	41.7943	20.8378	39.7801	148.946
	217.919	14.0427	11.1079	5.9507	35.8036	18.85	31.7541	63.5508
	61.7098	19.4908	10.8029	1.65256	32.4829	27.628	36.1581	61.2115
	60.0644	20.0646	12.5861	3.58677	46.4483	16.1535	34.2586	42.228
	55.1631	15.5479	12.5546	3.83188	43.2474	31.8649	27.4558	62.2343
	324.287	21.2874	11.5203	4.33634	40.8736	20.7912	53.5548	110.476
	47.8823	15.2201	12.9735	4.98469	30.4096	30.6301	28.9167	55.9043
	36.8143	28.3382	15.8566	2.65835	44.927	14.754	28.5418	44.0694
	46.5399	26.4891	15.69	3.27733	42.1912	23.6615	29.2279	76.2555
	61.2443	14.3259	11.5572	3.86744	36.7176	20.3549	35.1769	57.1928
	54.229	21.2095	20.1849	4.32818	35.7082	51.3002	76.9431	99.521
	62.8148	136.704	14.7448	4.56629	38.942	15.4492	44.2233	64.1035
	31.5895	24.1475	19.7621	6.28568	36.1486	21.7639	26.6128	54.8515
	39.124	25.7402	16.2207	5.66277	30.6888	25.1495	179.206	46.5545
	50.6212	25.0463	16.5592	2.12251	43.5336	12.2554	37.3727	54.8417
	53.4573	18.0361	13.6512	4.4847	42.9327	15.8459	28.5511	45.7683
	39.6034	26.3621	13.4026	3.86754	39.1403	16.3228	29.7849	67.0971
	40.1659	17.1558	22.839	7.26737	52.998	18.5913	42.9082	47.3786
	38.6499	22.1172	15.9428	6.10651	37.7204	26.2218	42.4206	69.6332
	38.0093	19.7069	18.9009	5.63351	36.6773	15.1883	36.9779	81.3824
	53.4257	14.549	15.4249	4.18468	34.7516	25.3635	35.0423	71.697
	33.9968	19.5093	12.072	5.51668	36.2727	29.8984	33.4066	45.4652
	49.2002	19.8036	12.2779	5.32488	47.547	27.6854	38.5749	56.3425
	57.3378	14.4134	14.3415	6.73475	31.9633	16.1322	31.6627	43.0906
	41.4467	17.805	16.3024	2.82222	34.4551	27.7329	39.7425	48.2333
	38.8583	15.1886	12.9961	3.61993	48.3212	28.5847	35.1303	45.0171
	28.1296	35.9558	21.7311	2.91963	39.2882	17.4127	40.6053	52.1131
	83.9492	17.3446	41.0917	3.88099	70.2217	23.6527	30.6634	58.0322
	42.7518	12.9514	17.7116	4.03416	35.0239	16.9707	38.0423	56.7349
	775.586	20.6856	19.3106	3.53519	36.478	13.0599	37.3358	57.3308
	35.7101	26.581	12.6982	3.99402	35.7659	21.4093	32.8192	55.1845
	39.6378	16.1662	13.8312	4.54161	34.1142	44.731	36.2524	42.2303
	83.3794	16.844	18.3305	3.25478	39.3997	17.0104	36.5526	62.9109
	56.9844	17.266	16.5686	3.17262	51.3946	20.3441	48.0003	214.232
	114.587	19.1227	19.5544	7.62678	40.7551	18.3292	32.9577	61.7636
	37.3157	19.5408	12.7034	9.00825	42.5652	39.5214	99.948	60.3423
	40.9768	19.8846	9.09719	4.09054	37.9043	19.1557	30.2564	79.2906
	40.2952	63.3801	12.0375	3.56797	34.0971	14.6503	26.4418	55.984
	32.1044	14.7528	14.9005	5.27071	43.9955	22.0596	34.6854	81.8796
	32.5682	17.2689	24.4159	5.22726	44.0714	13.0813	46.981	56.6903
	58.6376	35.7402	11.7088	2.2415	43.3198	18.527	27.3164	55.2829
	64.1085	24.6219	12.6054	6.14016	36.5858	16.1713	28.9819	74.7858
	43.1064	16.1823	16.515	2.48242	27.8486	16.5588	38.6838	61.9143
	44.5201	104.986	15.8701	3.93527	35.1986	17.8517	44.6104	60.9083
	32.6391	20.8694	19.4347	4.61687	39.9638	17.2181	35.754	47.5624
	48.8892	18.4666	11.9611	4.34729	34.0269	19.2694	104.935	58.2818
	58.6909	16.6335	31.7592	3.82689	81.1113	19.1467	49.6158	79.2469
	28.6181	93.3361	11.7962	4.96828	36.7838	12.2476	32.1919	104.079
	39.8563	19.1849	11.3736	4.31225	36.3162	18.6524	48.0109	109.679
	47.3934	17.8235	15.7684	3.77669	46.1877	25.0075	34.9957	51.5624
	36.4762	20.8919	12.9292	5.91172	54.3025	13.9139	46.5413	60.9757
	44.8832	18.6365	12.9623	7.79713	32.3786	22.3698	30.3057	45.3079
	35.7332	18.9302	11.4987	4.19144	45.6696	25.6288	38.4385	125.952
	39.9288	15.8174	32.1508	2.47986	44.9335	21.2191	37.1539	54.5244
	51.3374	14.7902	12.7003	5.12457	46.2008	24.5602	21.8108	51.7259
	30.7667	17.1955	19.194	3.77011	32.6395	17.4571	43.3836	91.1165
	31.3834	18.6238	16.7131	4.63143	40.026	15.8157	29.081	73.5317
	64.994	28.6762	17.6361	3.8408	41.907	19.8926	46.1396	64.9969
	39.049	17.426	17.141	4.39678	34.1696	26.1372	32.2796	44.2415
	25.0997	21.1151	13.769	3.1513	33.8165	19.738	54.7151	38.5393
	42.9185	19.8119	17.4082	3.91207	68.3192	40.5898	42.7273	38.6937
	31.6131	16.6166	10.095	3.42181	36.6188	15.9738	37.5424	80.3269
	45.5725	15.4665	11.4095	3.87119	48.8715	22.5594	38.3106	61.7606
	30.3758	20.6425	11.0574	3.26413	34.7472	19.1985	31.5173	55.8992
	56.9974	22.1746	15.5534	5.19057	35.5341	20.5947	30.8238	47.6171
	55.2188	14.8601	13.6943	3.53705	80.5601	24.3123	30.0687	43.292
	40.9042	18.0944	9.09697	5.11423	33.7963	21.3419	42.1925	117.077
	59.2136	18.3629	9.01418	3.88758	43.3758	15.6038	37.7657	53.6523
	86.8282	19.2115	13.5611	2.80572	31.657	25.7539	29.7303	56.5137
	75.4233	24.0827	15.0594	2.62089	35.1885	16.8619	26.8475	110.304
	53.5186	24.4521	15.5249	3.72885	38.2941	35.0949	31.4998	54.0173
	43.9949	27.8724	10.1322	3.62588	45.1318	32.8753	34.3805	61.3233
	46.8664	24.9679	20.1272	3.3316	146.428	15.3698	35.0695	55.8897
	131.383	18.1972	9.9975	4.33455	41.1987	204.395	27.7377	50.1424
	60.765	26.1043	13.5943	4.39879	32.3145	24.1993	29.1369	51.2443
	43.921	20.8959	9.74787	5.09359	33.3038	17.2671	41.4401	45.0788
	34.8253	20.8195	19.0246	4.57366	35.4444	20.0126	50.2078	66.2162
	76.4866	19.9726	15.2496	3.49813	50.3948	14.2576	35.9541	54.6753
	36.6433	27.445	16.3454	2.41941	35.8608	16.823	42.9919	43.4407
	42.3468	20.4745	9.83562	3.69394	36.8649	22.8294	35.6579	63.0327
	30.949	26.0938	17.7759	3.20558	41.0587	19.4265	29.5217	57.8755
	53.2664	26.505	13.9251	4.91838	33.6404	22.4597	43.2964	70.5428
	84.4928	17.6752	11.5401	3.95282	42.1301	32.3004	29.8942	129.843
	36.0185	25.7698	13.6313	4.99275	43.583	19.0332	33.1936	40.846
	42.7649	33.2281	10.5411	4.76506	30.8457	17.964	37.8662	45.5988
	36.4772	22.6483	8.50518	4.48362	41.8274	16.6529	40.4512	59.182
	47.5997	24.7188	11.9672	4.59699	41.3	13.9128	32.6578	46.3706
	40.5225	23.0277	15.513	6.51648	120.076	20.4143	43.5346	75.9108
	36.3941	24.1108	56.3641	2.61616	32.5023	19.0716	27.934	37.4528
	63.6747	28.7816	19.0142	3.79654	39.6889	19.6579	35.8944	56.3121
	32.8196	31.4245	12.3661	4.80567	52.7818	17.6531	44.8949	45.7428
	56.7921	18.7138	14.6337	11.5517	54.9556	15.772	37.2027	63.0002
	76.8412	27.5179	15.0504	2.87624	32.3397	26.1647	27.29	59.8627
	34.1978	21.0061	15.0929	8.26208	39.1469	36.4417	222.343	42.6632
	38.9796	28.7636	12.862	2.66742	36.5029	11.6677	46.4428	48.2715
	37.5216	60.2037	13.8436	4.63973	35.7624	12.8072	30.0813	55.246
	37.5579	74.8231	13.1978	4.16652	34.2379	16.4169	36.9643	54.2718
	31.4987	31.7664	11.8527	4.42147	42.3538	42.3614	37.5181	50.0805
	37.1118	44.9578	11.3825	4.9059	30.71	20.1372	33.2865	58.987
	54.6249	22.5402	11.2385	9.61336	41.249	19.1855	42.3942	55.1761
	60.1175	26.368	14.3285	5.84344	41.6326	18.3055	28.6647	46.1424
	154.614	47.4042	14.6271	3.54603	50.9652	24.9848	37.9973	54.4152
	32.371	31.5288	10.3028	3.45829	44.0481	24.7075	52.1393	46.1202
	56.4044	20.1909	15.5101	3.62961	37.0274	20.5303	74.834	75.4416
	49.8317	29.6452	14.3441	6.83011	30.7533	14.4625	36.5479	34.9993
	60.8896	15.6064	15.222	3.80665	43.98	16.275	36.9223	36.9708
	58.714	59.5242	9.39773	4.30511	41.5538	22.5349	40.3538	61.8752
	60.636	44.6846	13.2106	3.73328	37.0599	29.6907	44.4677	45.6038
	31.9197	26.5004	20.6209	4.62083	35.8049	22.7787	42.9186	52.4303
	43.9552	20.583	17.1529	6.2693	36.768	22.7496	34.2738	46.1798
	43.2564	36.0517	9.61364	2.95643	44.7441	19.4771	49.3285	46.0873
	56.8796	28.1498	18.2207	6.66323	33.5291	14.9899	40.0207	52.7585
	30.677	21.4676	10.7365	5.15552	35.2523	22.0494	45.0776	55.9605
	36.24	41.688	12.3857	5.48775	41.195	22.0774	30.2511	56.441
	31.2662	23.1744	10.0847	2.80949	45.4457	16.9027	35.4695	62.049
	46.7355	18.4512	12.5566	5.88231	41.8337	27.6477	38.2363	64.0648
	41.1668	22.4818	12.6093	3.22658	36.3587	12.3351	40.4715	33.8244
	27.4116	46.6046	11.2837	4.97768	36.3172	21.0603	42.242	40.8668
	53.1102	25.0341	12.8301	4.04835	41.4554	20.488	54.6257	74.7657
	32.4562	24.863	14.7857	5.4624	35.1475	26.5699	27.9704	59.3762
	29.3651	21.3476	10.9354	4.28472	33.6751	15.8598	30.2903	78.7626
	47.3356	34.5377	14.445	5.25375	39.3109	52.6985	31.2838	48.673
	36.737	18.7324	14.3322	3.99118	41.3683	23.9583	30.3192	79.2205
	35.9389	21.2561	42.9856	4.1446	28.9252	22.2176	42.7427	57.571
	36.1415	18.9654	17.3638	3.64369	39.9222	15.9659	30.022	61.8401
	27.0596	30.7651	16.8423	2.86457	33.0489	12.9669	39.7911	34.4415
	49.9871	30.5663	8.23767	3.89669	39.2654	27.2923	35.7241	43.9918
	58.6792	30.907	29.2459	5.93375	53.0017	17.9967	38.7824	77.7349
	95.2681	45.4455	10.5627	4.735	46.9153	17.6886	24.4816	48.5909
	43.4475	20.6289	13.2171	6.35846	42.4429	11.7938	39.3656	52.4417
	66.078	22.4271	10.873	5.06402	55.574	12.4279	39.195	47.538
	39.2026	16.6688	10.587	5.64044	45.1777	14.5508	32.6117	55.0173
	41.2501	21.1736	14.5866	2.35983	40.4828	21.8155	36.7202	52.5184
	28.9311	30.0732	14.8256	3.66953	37.9247	15.1381	35.4085	50.0261
	24.6574	23.1837	16.2164	2.82357	43.865	24.5793	24.606	62.1132
	43.6202	30.97	35.5005	8.00949	61.671	22.724	49.2047	54.9777
	43.7848	24.0958	14.9115	4.00251	50.5384	14.8017	29.9121	45.7179
	31.1204	63.5994	14.026	3.93741	39.7302	21.4548	24.3764	50.691
	79.8568	202.122	19.4727	3.83115	40.6507	18.9338	50.1526	80.9706
	24.4709	41.0049	14.8888	3.93401	39.7925	57.9688	103.292	63.2585
	72.7411	21.2932	11.5411	4.45695	37.163	33.4601	40.8997	48.1465
	50.6929	22.9113	12.3567	5.34447	35.7279	29.6627	37.4619	77.6514
	65.097	25.2035	13.432	4.79878	44.7341	21.8294	92.8095	59.9289
	33.0317	33.3946	7.65874	4.32771	37.0101	10.8854	30.416	39.9028
	47.1487	22.7134	14.1968	5.56295	37.9879	15.929	33.8733	176.575
	39.3251	33.9341	20.2315	4.53289	38.0042	21.1676	25.5066	59.4052
	51.8749	36.3508	12.0311	4.51974	38.4523	16.9636	26.6138	33.6361
	46.5747	22.1441	13.5487	2.69456	40.502	23.9425	35.1721	72.0242
	57.2157	23.6553	18.1443	5.86483	40.1825	21.8105	31.1828	51.7219
	34.2673	17.3382	17.1102	3.95526	40.7062	21.4266	46.1253	53.3593
	28.6095	26.1472	12.1735	4.80197	39.1092	24.9442	24.8796	40.3206
	86.7046	24.1628	19.2132	3.18367	34.1851	15.5385	24.3309	78.5886
	34.0262	22.6561	19.7854	5.6438	59.1274	28.1767	35.9554	73.9978
	22.9588	24.2847	13.2939	3.38177	53.3581	17.9873	34.1108	39.1896
	38.7564	25.5641	8.19876	4.58792	40.0123	19.673	96.9305	59.3795
	46.4473	24.5344	16.7992	3.4351	36.1087	22.1227	41.9977	52.258
	26.9767	26.7035	16.2011	5.53268	39.9651	20.6327	51.694	36.8394
	38.4339	19.5857	9.04466	3.71366	69.0945	19.794	77.1615	143.909
	51.2197	217.711	12.8834	4.55692	44.7587	15.5055	33.4076	47.9424
	111.775	24.3258	13.3498	5.01632	31.2372	26.1879	40.3218	55.1653
	78.4068	22.6443	9.59201	4.54064	66.7282	19.6522	58.526	48.3465
	53.1316	19.9347	12.7926	4.7002	86.292	32.8114	57.3998	50.4048
	46.8388	25.4679	16.6373	2.61665	48.5035	14.5763	65.9305	50.4399
	51.0413	35.0509	9.51861	3.91793	43.3707	14.4347	40.391	46.1072
	111.018	21.5222	9.5898	3.91559	89.6163	16.2768	44.6439	47.7624
	28.8881	43.6866	60.0798	4.4259	40.2684	31.8815	41.0394	184.829
	46.8732	31.0301	12.9317	3.96754	33.6218	18.5853	31.5987	38.2935
	36.6525	43.4613	9.61662	4.55652	74.177	14.1645	36.2042	84.5397
	214.639	29.9298	11.1525	4.90595	36.6104	12.6126	46.0008	70.1738
	61.0295	21.8028	12.4278	4.17047	42.8033	17.74	55.8754	60.6637
	28.2963	18.2677	14.2789	4.07477	53.499	14.1488	37.4452	45.6306
	52.3598	22.8885	24.099	3.93951	37.9351	19.9077	52.9838	43.1241
	26.2057	21.3587	12.4786	5.63876	39.9625	17.8664	46.6304	42.8547
	30.4236	19.3074	13.7414	4.59281	37.8343	21.8349	72.2234	75.293
	41.6142	44.2817	17.3641	4.32304	33.8215	30.6605	55.9217	41.2131
	21.2932	333.237	15.3289	2.9042	33.5449	15.4386	51.3321	48.573
	32.2167	28.5722	14.9121	4.28484	39.5729	13.105	53.063	57.2415
	46.2265	29.0412	11.817	8.18773	28.3991	14.6803	37.8569	56.6932
	79.9851	24.0786	9.99946	4.8203	50.6032	30.8033	89.1998	81.0047
	58.7751	41.0159	14.4108	4.67796	40.7965	14.2526	28.342	44.1287
	42.9715	18.403	25.3566	4.53475	37.568	18.4952	41.4423	48.5251
	68.1946	38.8936	10.3125	3.54122	28.8327	13.9676	44.7253	57.0228
	129.092	25.6722	12.2941	4.81622	34.1582	14.4468	60.5481	58.5579
	37.6709	53.2277	18.5622	3.94323	34.5877	19.4988	36.9817	48.9218
	39.5471	57.4554	13.4422	9.15858	42.6885	20.6305	50.4146	43.0203
	31.8865	31.2647	17.4941	3.47206	40.252	14.8497	61.0759	41.9246
	41.8629	26.4017	10.2809	3.99859	46.3738	11.3694	34.4007	33.885
	37.032	32.4145	16.0655	3.51261	36.3985	20.6307	47.4249	40.6784
	44.5258	23.4577	11.6026	2.53897	29.3149	18.6171	36.9312	47.6404
	47.3737	17.8255	12.4302	10.1812	27.9052	26.9022	46.4098	53.5346
	28.9486	33.4543	16.0821	5.8758	78.4522	69.7218	45.4139	73.8752
	86.6234	28.464	12.5319	6.57917	37.2748	21.4579	40.311	33.4687
	51.4176	22.3012	9.67205	4.05343	41.563	18.7132	38.3644	51.9585
	48.2089	48.0332	10.967	6.63159	82.0054	13.5305	28.9665	54.0042
	60.4083	28.153	10.7668	3.98988	33.6531	23.1353	42.207	51.8437
	35.0894	30.5243	11.0292	3.58905	69.4321	15.3642	36.026	42.641
	24.8871	27.474	14.1682	4.15933	32.9701	17.9649	38.1441	47.7153
	58.0985	25.8587	13.1428	4.76774	58.8316	13.3866	47.4847	75.345
	31.545	18.1095	10.2397	4.10198	38.707	26.7924	33.7967	43.0049
	54.0367	27.668	13.36	4.0507	40.3133	28.8872	30.0064	47.8737
	367.313	25.1027	12.4903	10.5753	39.1402	33.3549	34.1212	48.4139
	73.4593	20.3832	10.5353	4.01105	36.875	21.1109	32.2353	32.9622
	73.669	19.5869	13.8948	3.3008	37.6003	18.6372	42.192	44.8346
	40.6922	19.0911	14.0482	3.97302	45.0227	18.7344	53.0784	45.1767
	70.4621	20.2437	11.4817	6.4639	41.1561	13.6418	74.5013	41.5285
	70.7754	22.6776	15.1882	2.68879	49.6845	21.8	62.5861	71.3063
	48.5611	64.8929	11.7672	4.92798	40.5462	15.4845	31.2105	27.0271
	47.3157	21.5478	19.7588	4.06997	34.3174	26.5904	40.9034	67.1844
	38.1531	25.631	11.8013	3.86523	45.0458	23.5036	45.1577	51.8696
	25.5419	23.8917	14.9812	3.53156	48.2215	19.5091	50.1788	41.2913
	35.3529	22.6852	10.2509	2.45392	38.8142	21.8093	36.092	45.8139
	38.6857	16.6902	14.0918	5.09438	42.9795	18.1541	34.7633	49.9848
	76.4303	26.0724	16.078	3.76738	40.6769	25.438	41.8818	52.9723
	50.6516	23.2726	14.913	3.34409	46.5888	28.3668	45.4604	46.4752
	63.729	20.3113	13.1843	4.0365	47.2141	19.0368	68.1871	42.0489
	58.2732	41.0102	18.1402	3.13385	31.168	24.5602	74.1306	32.9713
	49.4817	31.0209	11.4234	4.01741	87.9946	28.2267	44.2118	36.558
	54.9972	21.6446	13.3679	2.95395	31.1454	13.45	36.3492	44.1752
	49.5986	21.0807	13.9048	2.69389	34.9728	30.584	138.072	50.4104
	43.0952	23.8199	12.1473	8.42725	35.0809	18.5472	30.8693	57.8171
	53.4959	22.6681	10.2425	4.3327	56.5852	16.1512	46.8163	47.195
	34.2335	20.7479	12.4072	4.63027	29.5892	27.6886	44.2502	66.923
	76.0867	32.415	9.10318	16.0309	43.0357	19.6365	43.909	46.9084
	38.4245	15.9236	11.7975	3.86676	57.882	16.1394	34.3815	35.7378
	41.148	21.3014	12.9068	3.95827	40.7663	17.6084	53.7473	48.3862
	33.9124	25.1129	9.70074	4.75532	50.6006	22.4579	71.4655	48.5883
	51.3932	28.252	16.798	6.74911	46.6366	33.1526	35.7255	66.7463
	59.2718	23.6404	11.7803	6.41709	28.7506	16.7879	47.7125	45.1639
	57.7512	28.3521	18.6367	5.79416	41.9809	17.6882	64.418	46.8624
	60.7722	30.9181	15.2803	7.59702	37.5895	21.9265	33.3322	59.6049
	39.9202	31.2433	10.5939	4.72146	37.8279	11.5408	40.8273	106.06
	43.7097	26.1346	11.5019	6.35435	36.8454	16.4029	45.7546	68.9112
	58.2321	24.4184	11.177	11.8153	47.3099	19.0388	45.569	54.6728
	39.2917	27.2928	13.235	8.88095	33.2599	16.4421	39.9313	37.2176
	43.1423	26.2449	9.16548	4.19822	35.7004	20.972	47.8782	45.8154
	43.202	24.1895	35.2082	4.63462	42.4378	34.4757	108.58	59.2621
	35.2541	25.6675	18.6161	12.7697	39.9536	36.1978	46.5508	55.3784
	42.1162	20.0976	10.3974	4.50041	36.2447	19.8454	57.805	55.0106
	65.9942	20.0609	12.5086	8.52327	49.3468	22.9551	69.202	62.6126
	44.7012	28.039	12.8874	9.01028	32.9651	15.0076	36.189	48.9832
	70.7343	21.1973	10.8508	4.80927	39.8353	18.8304	39.523	41.2188
	39.8973	25.5348	11.4026	4.46539	43.9676	16.4466	42.34	76.8501
	38.1795	23.4944	22.8431	7.10762	42.2695	32.3501	33.4238	78.9167
	75.4844	19.4544	10.2215	7.53335	31.8219	27.6959	35.4781	56.4586
	39.542	34.7402	12.8182	3.01039	31.9533	18.2426	51.0334	44.7625
	34.9467	22.9745	21.4273	15.1331	33.4947	14.9466	53.1206	49.9245
	44.1278	23.0152	14.9396	5.09799	40.4016	23.4886	38.1922	52.0224
	55.9157	22.502	14.5984	7.07447	40.8255	22.6742	63.5002	53.3116
	46.1549	25.065	10.9873	5.01877	53.5852	20.6429	53.7227	74.1662
	47.6496	21.5435	30.5709	7.14164	40.166	33.7948	41.5419	60.3938
	70.5239	26.4358	14.2241	5.63237	51.0792	15.887	125.353	51.8787
	44.6355	19.353	11.766	4.44175	31.6221	14.7395	56.0771	43.6612
	102.866	24.7566	11.4794	10.4214	41.2329	17.9167	47.5864	71.7013
	29.9442	25.7352	16.6117	5.14283	47.4518	33.0907	62.0465	71.426
	29.9997	22.96	13.628	3.23204	40.755	19.4857	56.9697	53.7763
	40.9361	15.4737	29.4478	5.3185	49.0279	18.1961	34.2194	50.0354
	74.2555	28.0407	12.539	4.82461	50.8253	22.3148	35.4849	44.6358
	96.4849	27.8684	13.1353	5.49711	36.9282	28.3982	49.0815	307.389
	45.1432	22.8888	11.4037	4.77561	47.9728	18.1283	37.8743	65.0485
	40.2815	22.1153	20.6726	7.19735	42.0171	24.7673	53.4901	47.799
	35.9759	36.2137	15.0044	7.09544	30.5878	23.9589	42.8383	38.4528
	48.2761	22.3472	25.8382	3.75596	46.1985	19.0078	33.895	52.952
	35.6295	20.0136	12.9285	3.42131	46.8091	19.7542	30.4299	52.1086
	53.2787	15.8164	13.8991	2.75595	53.0758	22.1007	57.0545	45.5991
	38.3005	44.185	23.2994	4.16	33.7523	20.2656	49.6008	53.6442
	42.6916	25.8412	18.4346	3.41524	40.0483	18.3772	47.9302	51.8169
	53.9677	20.6012	11.442	4.90154	43.023	22.5216	79.0954	73.3296
	48.8034	41.3264	11.7056	3.93946	57.3152	28.6294	41.7794	61.0166
	27.3782	20.3594	22.2251	3.25025	39.2622	16.4983	55.1119	43.6469
	44.0937	24.3416	14.561	5.43589	38.0064	34.139	44.7254	44.0074
	34.0288	143.305	15.6939	3.2177	36.7487	22.4612	37.8887	47.7295
	35.491	40.1301	18.2108	5.23205	25.6396	64.7352	35.356	48.4363
	35.1728	29.0332	13.8334	8.40727	36.7485	15.6624	48.0999	58.8633
	33.3192	23.2275	14.6612	6.29095	41.2028	28.5048	35.3856	44.265
	27.8862	31.8588	24.2586	6.29924	47.1347	15.8108	73.8735	43.8621
	110.232	25.0959	12.1358	3.17096	38.8498	17.914	25.3614	60.9893
	30.4794	18.9151	17.5358	4.3195	44.3353	28.0866	34.6564	91.9953
	88.2882	37.8671	15.8519	5.49389	32.8261	17.7821	28.7569	50.0219
	68.7852	21.3189	23.8477	14.6577	35.2034	65.9603	49.122	52.6357
	66.2868	18.4266	10.0914	3.52538	35.1465	20.5845	39.4656	50.5634
	167.688	26.0016	14.9606	6.94617	41.7166	15.4121	39.9452	101.936
	58.6658	47.447	17.7459	3.85944	29.5862	26.432	35.2611	45.2459
	43.4372	40.4881	16.9281	3.36091	33.4743	20.7435	47.7421	159.3
	34.1375	20.1031	14.2352	3.63589	36.5697	22.5086	54.4854	53.9454
	42.0736	20.2578	16.8614	4.40801	52.1148	18.2324	41.1163	50.176
	25.118	27.5791	11.9327	5.28476	36.3535	28.2857	31.1758	85.833
	48.5997	38.2688	17.7417	4.61399	54.5215	27.5682	77.8378	61.685
	38.8102	26.42	11.5067	2.80767	29.2767	15.6692	43.8904	95.1733
	48.9134	100.512	11.3032	3.79941	35.8675	26.8959	51.4697	67.558
	63.945	26.7669	15.6585	3.20087	42.8776	19.2061	49.0748	60.3605
	44.6395	68.8957	10.7236	3.64527	40.6949	15.5437	51.7267	181.962
	35.3814	41.9113	36.5328	4.03484	32.4445	26.8649	47.1144	43.3904
	45.0661	27.5925	16.0735	3.66173	39.975	18.6537	40.7339	68.4116
	38.8695	30.5155	10.1039	4.0939	27.41	22.244	30.9757	71.5531
	38.949	18.9423	17.9817	5.54783	51.3973	14.7524	40.4748	41.7673
	31.1458	28.1089	17.8377	3.36321	38.6729	16.1903	46.6926	42.2695
	42.5688	24.0186	19.529	3.07678	46.5245	16.2135	34.0934	41.3959
	195.263	30.7215	9.87741	14.1397	31.9242	23.4744	63.6002	91.0246
	23.8974	24.2189	13.5848	2.98025	40.7892	37.5077	32.7956	44.9347
	40.4961	42.2429	13.3916	2.93607	39.331	26.4434	39.1067	48.6405
	65.7744	38.518	14.1999	4.67179	53.088	19.3891	43.292	57.1126
	37.3941	23.8684	18.2537	2.98299	42.4768	14.9136	35.8344	72.3661
	90.3435	25.792	15.0733	3.74953	46.546	22.2857	45.2117	59.9573
	231.034	25.9911	13.1174	5.39355	36.2883	19.8737	29.8212	44.272
	54.1879	26.3309	16.0162	3.9622	36.391	11.5802	29.4602	804.572
	61.4126	21.0837	13.5183	3.30098	40.6411	16.6821	35.5107	55.5612
	27.9074	28.2192	15.3333	20.6455	39.3179	15.5835	42.676	89.6901
	43.5138	17.7712	11.6996	3.46257	38.2322	15.5639	40.9634	96.1773
	38.7288	63.9761	14.1124	4.08958	32.9049	12.2058	36.493	40.1264
	55.0187	22.5086	13.4481	4.59436	40.5476	20.9457	36.4621	61.4932
	76.71	15.3492	14.0526	5.09419	40.2723	27.9372	41.6199	55.1206
	59.6722	28.3946	14.7006	3.48223	42.7625	13.4527	36.1161	50.1403
	130.137	24.6544	9.94538	3.91435	37.4846	27.6808	33.0527	60.3956
	35.5609	22.4312	16.9727	6.01291	53.6074	20.9523	71.3783	53.9461
	31.8858	33.1623	16.1684	4.20791	42.5419	11.8484	45.9292	87.3048
	62.5686	18.3659	10.144	5.41178	40.1838	22.4949	31.2226	68.05
	130.198	21.4418	10.3707	3.82537	32.3638	17.1008	61.1726	59.1419
	39.4809	24.1444	14.604	3.12975	95.1025	24.0545	47.8745	42.5925
	95.9113	20.5779	12.6457	3.74804	33.7063	21.4446	30.4511	51.6283
	35.0622	19.9258	11.5306	5.51525	115.271	16.8105	28.6005	104.479
	46.4341	13.4544	15.0569	3.72221	87.0908	18.9345	38.8691	58.1632
	69.351	20.3486	13.8332	2.90769	44.8126	17.9068	36.3498	58.4321
	33.1634	28.0114	11.0037	4.32363	35.0504	15.3951	46.1642	42.9524
	50.4609	25.6811	15.1035	5.66247	53.3934	18.7594	62.2633	87.3877
	33.9007	22.8948	12.9122	7.39253	62.1225	21.277	30.4229	44.3841
	81.0788	25.5457	10.3081	3.88777	36.2643	16.2337	53.0004	48.0287
	45.0521	22.838	12.9759	4.26339	43.6135	13.8308	36.5111	45.53
	64.2491	17.7083	13.7035	4.58501	38.9345	18.0701	48.5884	67.5744
	28.743	26.3725	14.626	6.01653	50.1699	22.7575	37.8329	82.5247
	41.2329	21.2604	10.1594	4.33149	38.7015	21.8351	40.3331	49.2739
	34.5043	27.2148	10.9527	3.50498	33.3583	13.8755	39.8384	57.123
	126.726	26.5719	7.7291	5.66343	42.278	24.6883	36.2349	63.7901
	56.9408	19.6724	10.5832	6.01007	30.0037	20.557	33.6382	54.3665
	65.3865	22.1709	11.6195	6.13065	37.3545	18.3874	36.451	46.3275
	33.2189	19.3775	15.2276	6.50243	37.7782	20.8358	56.3243	48.0971
	30.1141	21.4773	7.70506	5.09097	37.3612	13.9785	73.51	57.7545
	56.7154	19.8417	8.88247	37.0965	38.3175	19.2172	40.0809	54.6252
	47.3288	22.1646	9.27926	2.29822	40.7271	17.8452	42.9318	38.858
	42.1464	25.1623	10.7773	3.41128	39.6429	17.9553	31.5877	51.4663
	40.332	16.8639	34.4093	2.7599	35.681	22.7583	42.1514	60.4568
	34.9458	63.9787	10.0198	5.12026	39.1741	13.8517	49.0826	44.7767
	33.2023	16.7877	13.8163	6.51714	35.0049	19.3222	36.2144	68.012
	58.0397	20.5146	15.6522	5.67143	34.1003	19.408	43.4127	48.3378
	55.5786	14.8417	13.8106	4.87884	42.5862	33.0294	39.7821	47.9256
	65.3652	24.5755	20.3947	5.14141	37.5481	10.3411	31.3376	46.6602
	48.822	25.5945	10.0363	6.57246	41.1871	20.0553	50.6131	66.8017
	93.2567	19.1364	15.5563	5.14965	30.3575	19.7727	31.8483	69.5877
	25.4355	21.2092	8.33631	4.23245	35.8541	26.673	30.2161	31.1477
	137.38	25.6065	10.7227	4.98717	40.1242	17.395	39.6931	55.9601
	79.2228	19.9832	16.3276	4.82852	34.0623	24.0881	67.7011	63.8395
	41.5418	20.1582	13.7817	3.35335	43.8032	18.4975	34.3098	68.4496
	34.4466	17.0258	12.4034	3.83147	121.223	13.7688	55.0727	56.5304
	43.814	27.1785	8.59481	5.27379	35.8425	15.4325	32.5289	47.1931
	44.2347	24.266	15.6532	3.555	35.8162	36.4179	31.8577	52.4699
	35.7163	24.1979	11.4387	6.44488	47.1849	61.9316	128.613	56.6463
	48.3494	18.5541	7.92296	5.08386	47.544	96.7227	38.2647	46.2842
	45.5358	21.0656	12.0901	4.04387	31.3198	22.3314	54.1336	59.5876
	43.092	18.5239	9.3072	4.99673	41.9448	23.8921	33.8151	50.9289
	40.024	34.5447	11.3594	4.01429	40.8189	20.7253	75.2764	48.6404
	36.1166	19.8634	9.31134	6.97692	41.5266	32.9029	48.1828	87.8219
	61.9959	26.6686	11.952	3.52554	47.8358	19.0709	76.0656	43.8647
	195.163	19.7369	13.8294	3.57874	37.2063	15.6921	48.4782	75.5456
	52.6217	19.7543	10.0497	7.77124	36.9989	28.0356	41.0551	48.3026
	40.7333	16.8156	9.72305	6.07225	36.2338	15.0808	68.4835	53.7169
	80.6072	19.3469	10.6294	6.71678	33.6547	22.5176	51.2831	63.8646
	73.3316	22.664	12.327	4.2968	42.9265	20.8422	33.1202	54.6232
	38.8805	175.995	6.59044	4.69835	31.7425	24.5893	90.9268	91.0366
	29.9339	18.1895	11.1857	4.85262	49.5065	18.8055	59.5235	90.0327
	47.5306	21.3392	14.2929	5.16275	38.8133	48.7415	35.6276	65.846
	65.9409	24.2786	9.91652	3.98472	33.1812	14.3204	32.8025	90.2045
	62.0689	16.3259	9.60158	4.96936	39.1433	15.4983	51.1736	60.3193
	37.2099	22.7197	8.88718	5.26985	41.1781	31.3235	46.249	56.2178
	32.3735	33.1253	8.73978	2.47707	45.518	15.5222	46.1107	41.6684
	62.5413	21.4553	22.0222	3.63746	39.2983	54.8599	32.8058	82.6011
	85.7529	19.5726	11.3113	5.55654	186.214	18.9132	40.5382	68.7808
	40.4549	94.044	10.4006	3.78724	41.9169	34.806	51.408	54.3316
	45.7989	17.3254	14.4693	6.72099	35.9168	18.6996	72.0439	34.1116
	75.3174	21.2398	13.8389	4.39652	40.3867	13.7074	60.4491	68.6099
	40.6185	19.5154	12.9573	5.18624	44.7488	31.3087	32.2876	49.0774
	35.3956	23.7054	10.2119	4.96086	56.3293	37.0067	41.9359	57.2205
	47.0414	23.8517	18.2356	2.83367	51.0596	17.8721	32.6074	76.1444
	36.7026	20.86	12.2472	4.11824	35.2094	34.6341	43.2719	82.1743
	38.5135	22.6705	13.3372	13.8198	41.2865	19.4975	41.3811	68.7578
	44.3525	15.4509	11.5319	4.38155	38.1448	18.5179	36.7887	48.4545
	39.264	18.3732	13.2889	3.45401	77.1703	15.0861	33.923	46.4657
	30.0241	23.5895	16.3334	5.37306	37.4762	19.4401	27.8146	63.1332
	41.723	20.0787	15.9918	3.85649	34.2573	14.5503	49.5348	125.895
	64.6782	17.5211	17.4161	3.08897	37.5924	23.8572	41.4061	70.1489
	36.5414	21.9183	34.9762	5.64429	111.433	12.7941	38.855	53.9899
	60.08	28.2837	10.6664	6.42791	38.0452	18.0258	37.5224	51.4109
	28.6481	26.2581	15.2593	4.19608	42.6447	18.2817	33.0467	36.154
	28.8512	24.2494	16.1274	5.82179	45.2041	15.5486	34.7657	70.0052
	38.0011	21.5141	29.5685	3.39488	44.2483	22.2635	35.565	57.5206
	36.1972	22.6143	10.1699	4.59111	38.5007	20.876	29.0138	50.5547
	42.6271	83.1175	16.3151	4.1169	37.3736	23.0072	33.3328	54.8127
	40.2992	23.189	11.1881	3.24753	51.3077	20.5414	54.7792	62.617
	44.2755	44.0312	12.4052	4.32853	42.2718	20.9864	34.8674	76.5621
	45.4154	24.2165	17.0902	4.74652	32.405	27.3786	31.7003	90.3282
	40.8629	19.76	12.7707	5.40903	51.0467	19.0343	32.4461	69.9545
	69.584	84.4213	16.035	4.75254	47.8782	16.5716	31.3693	48.1329
	41.6291	69.6636	10.6317	4.34228	37.4702	30.4573	37.8277	67.8162
	27.8501	24.7028	10.2627	3.41672	39.27	20.4069	30.7098	68.9688
	42.4195	26.8969	19.6516	3.27628	41.3031	22.3945	26.6945	56.0766
	53.7316	40.9109	13.8615	6.61939	38.788	30.799	136.6	48.6585
	52.4536	23.3315	11.7289	4.98325	57.3733	14.3339	29.9884	67.2189
	47.6553	25.8097	9.37294	3.32043	38.706	30.2747	47.4644	84.2728
	69.4259	54.6269	25.2136	4.61328	44.886	29.2846	33.2794	39.5401
	49.6952	22.4635	18.9838	3.14688	78.0775	16.0095	104.942	50.9584
	59.1973	28.1256	18.347	5.50375	34.3513	22.2336	38.5009	64.9658
	42.8992	17.8277	15.6174	5.75001	36.9525	23.014	31.0063	43.0875
	47.4355	51.2432	15.1299	4.29814	51.4699	16.2698	48.8756	42.2283
	52.8335	29.5646	12.9619	6.17826	39.5121	23.0476	35.2813	64.6185
	45.0269	26.7567	14.6907	4.85377	40.5398	52.7003	28.5221	56.5499
	37.527	39.6528	32.8955	3.1926	41.4065	20.4883	48.4479	53.4265
	30.3986	24.6226	12.7368	3.70652	49.2259	26.2664	33.1896	69.3554
	48.2207	48.448	11.0613	5.04813	33.2889	17.7857	62.685	54.5517
	29.913	15.4692	16.2429	3.80625	36.3688	20.4936	34.0782	54.8921
	39.9677	15.5283	19.056	4.21905	38.8563	17.78	50.1711	41.6649
	44.3178	22.2217	31.5165	3.81993	48.8369	18.4963	31.0479	64.5671
	49.7342	24.8193	15.1154	4.63571	32.2957	18.7561	53.7926	49.8569
	59.2917	32.6481	15.7838	5.13256	46.704	23.4722	45.5197	58.0531
	57.9865	18.3602	13.2214	4.85748	41.3476	20.5897	45.3058	47.0257
	41.5411	17.7581	13.204	4.33959	49.4074	14.1263	41.5168	50.6064
	98.8824	18.6893	12.0762	4.29822	46.1123	14.4454	47.3155	55.3352
	43.6947	23.0315	13.0484	5.76197	55.6305	16.3597	44.5385	58.0981
	42.9285	15.2144	12.7107	4.64278	36.5466	25.7584	28.0956	48.1628
	53.1052	23.7373	16.9523	4.0946	31.2319	21.2079	34.7766	34.5022
	62.9587	27.5078	14.06	4.10015	57.3854	15.5174	38.2028	62.7405
	86.7217	22.1182	14.8203	4.00493	43.5186	19.2641	39.3028	61.4874
	44.6325	17.4218	16.7596	4.99409	47.9939	15.0204	136.215	54.7091
	59.364	21.6419	20.0947	7.11921	48.9976	25.6992	28.2978	28.2337
	45.2793	18.3441	11.563	2.60175	47.462	16.1892	52.6641	40.9818
	67.8698	19.2008	19.1397	3.75218	37.1963	16.8296	96.7419	79.6595
	78.0419	44.3612	13.2952	5.23341	40.0933	18.6055	47.9253	100.51
	87.8865	31.1354	12.7609	14.4254	45.8682	16.0938	45.2122	47.1277
	33.0577	32.3708	11.6227	6.55811	41.6034	18.0398	35.4446	61.0541
	104.23	28.5574	13.8553	4.2249	47.1482	15.7564	38.0202	63.7179
	65.2863	18.6545	15.4285	5.0038	36.1192	23.0645	50.629	52.0706
	56.9395	43.8208	20.6354	4.38968	33.7865	18.5025	30.4694	63.1226
	44.2372	23.9528	9.66317	4.92196	44.9717	16.6499	58.5773	59.2572
	44.1437	55.6306	19.4192	8.12725	40.1799	15.2419	60.9916	48.8284
	40.971	23.0428	12.8239	3.21033	60.8402	16.1082	58.1561	85.053
	58.3857	56.939	15.8896	4.92872	37.1695	14.0858	30.0557	66.0711
	47.5858	30.5922	18.5776	3.71686	35.9546	17.7666	66.8624	49.1513
	44.856	20.6943	18.6011	9.79287	41.5665	18.6873	41.1075	41.4727
	33.632	21.6098	11.9021	4.97559	68.7753	22.4266	49.5932	70.2048
	30.4115	20.7067	13.7173	4.30648	40.7874	24.3935	35.4712	40.527
	70.9135	21.1921	16.3025	6.20731	72.3699	13.1918	77.6	37.5857
	44.6648	19.1062	16.1415	2.59865	32.9229	18.0668	44.4127	58.1974
	39.8593	19.9219	17.5766	8.00392	42.8939	27.8213	30.118	79.7197
	78.9208	22.6456	13.7069	4.06401	60.3018	24.6069	30.2893	43.3246
	27.4567	21.9752	18.2557	4.57113	65.6006	21.5597	46.9581	74.2135
	27.8846	40.1581	15.5045	4.12495	38.532	30.5544	71.219	46.5354
	36.4408	18.2474	15.1818	5.07567	34.8102	20.7303	53.3214	40.9877
	31.9632	21.66	25.6346	3.07294	38.2318	16.8861	31.219	37.0987
	78.4078	17.6147	12.2498	4.72587	32.1939	18.4245	37.6803	41.5138
	42.6482	23.9852	11.7351	3.37151	56.0809	18.734	45.5525	47.7821
	57.2131	22.1034	9.80758	3.52104	30.5928	18.3435	229.588	61.4374
	48.1416	45.4443	12.6274	6.10483	41.7199	23.1104	35.3535	95.8364
	41.8199	26.9044	13.3491	3.93167	41.7318	17.4535	33.4264	48.7733
	53.7942	21.8981	13.3471	3.38707	39.7521	17.9556	32.6771	89.8021
	51.0949	25.2193	11.9961	4.08379	36.0404	18.2576	52.5895	46.8378
	53.6241	22.7208	14.3484	4.09509	39.0016	17.4406	41.3203	47.3395
	33.1647	14.3117	10.0069	2.83318	33.5495	15.0828	37.1098	56.4554
	53.3364	48.153	20.9556	3.07164	38.3447	15.7198	32.8814	40.5007
	40.7951	20.5509	12.2503	3.00147	35.5642	20.3442	61.9818	34.5417
	56.8164	29.2625	12.3655	2.83524	48.8267	15.5198	53.7467	97.2903
	48.1455	15.0117	17.6686	3.84347	42.6937	35.3962	37.6063	33.1249
	56.9404	15.7803	11.937	6.73019	43.9025	16.9442	51.7773	45.1175
	44.6771	25.2858	11.4856	4.50369	43.4959	19.8407	31.1674	52.3874
	49.0254	35.2679	11.8039	3.95231	77.4027	21.6407	43.0251	49.4454
	54.8786	26.358	12.2976	3.53674	40.7458	22.5657	52.1553	45.3136
	51.7064	16.2878	15.0102	3.70671	45.5975	38.0383	67.9231	77.0975
	57.3359	20.8537	9.81946	3.71111	43.317	32.2438	27.2202	63.9392
	60.8062	16.1961	27.7279	3.50512	35.7593	34.4404	36.8175	69.7936
	45.046	48.7741	16.1342	5.0779	44.8456	20.4847	55.6297	58.9575
	85.5644	23.5108	12.9265	3.36958	42.3917	23.2451	86.8578	58.6509
	122.194	16.9358	16.6985	4.52173	35.6466	13.7279	39.2991	64.7086
	46.398	23.2425	22.5849	4.10679	30.4276	13.2448	120.38	41.6217
	34.6019	26.2233	25.4977	2.72317	30.9	76.0784	30.6909	65.6021
	95.7542	25.6562	16.9574	39.781	37.519	20.6359	40.441	78.9746
	166.148	26.3252	11.7865	3.51961	51.5269	20.2623	32.2809	66.1438
	48.8288	27.6566	34.1079	3.73162	57.4416	17.0101	30.6051	48.5254
	41.114	19.2602	13.3618	3.57555	77.5738	22.7776	32.0949	60.0973
	46.0633	22.6451	19.562	4.05886	49.9938	14.6055	32.0785	118.676
	63.42	18.9504	14.0055	8.45179	40.7669	19.3885	40.5786	51.8439
	68.5392	21.0673	28.8351	3.12329	52.2783	23.9112	30.4615	48.2676
	137.619	19.0573	12.7869	4.12622	41.6789	54.5149	43.4388	83.2657
	53.8849	20.7107	36.6242	5.01443	33.8653	51.6832	41.7578	49.6218
	73.8589	18.8561	17.4481	2.36697	31.7702	19.8501	48.9168	30.1399
	38.9087	22.8176	42.3886	2.54133	42.2742	16.6546	41.857	38.7993
	58.9975	21.8874	15.0775	3.96818	34.2447	22.0644	40.9556	54.5688
	34.8817	18.5489	15.7229	2.03517	71.325	16.9533	96.6414	54.6195
	81.4078	21.5654	18.5528	4.18241	56.5033	18.7661	49.3442	205.102
	61.3255	22.2092	14.5092	7.49042	69.934	19.3676	29.7542	75.449
	57.5831	22.5499	16.4028	2.96401	51.1703	19.5451	41.3086	49.3904
	55.2433	12.7071	11.0371	7.16733	35.6571	21.8284	45.7378	73.3695
	94.5996	18.2902	13.6773	4.65878	98.2739	15.0085	41.0477	57.7161
	93.5214	20.921	17.0092	3.60205	31.5818	56.3597	33.5948	49.213
	68.682	21.927	16.9724	12.4726	41.3422	17.1076	36.4497	32.7498
	55.3297	20.4514	12.8821	2.70832	32.3331	26.0076	36.8038	45.455
	60.2683	21.1977	11.6615	3.52301	35.3727	15.4591	45.8564	46.0086
	52.8596	33.9697	7.53347	2.90064	45.0229	15.3642	44.2571	87.2519
	61.7305	16.1201	10.698	9.61565	45.9396	24.5254	33.8894	57.8605
	333.644	21.5868	18.1716	7.09295	68.6346	28.4551	31.4666	47.501
	177.22	17.1098	14.1532	4.22954	38.2803	34.1175	38.2673	47.0281
	52.746	24.4088	14.1363	3.03569	61.1068	14.691	36.5443	79.1389
	65.4873	23.8158	22.0237	2.14708	43.6458	27.7663	37.8024	44.7597
	61.1918	21.7041	12.3923	4.30191	67.7759	23.2626	32.9164	48.7866
	50.6366	21.5691	14.2792	2.76566	160.03	16.1244	41.2657	34.965
	75.97	15.0619	15.5305	3.08475	137.279	12.7656	42.1464	52.7901
	52.5799	23.2991	9.51397	2.77718	49.1762	30.3432	44.8763	121.555
	98.8734	29.9464	15.0451	3.05347	49.1267	20.9421	39.19	49.1296
	39.5917	21.4225	20.8017	3.53878	45.1418	19.7862	34.7379	40.0692
	64.6652	38.8852	14.7343	3.81258	52.8927	39.0106	46.4282	46.6923
	87.9344	183.535	12.3987	2.87205	36.8117	13.7548	46.1603	61.994
	81.962	17.8876	17.647	3.42521	52.3646	37.1218	52.4095	40.5348
	40.0595	17.0409	13.6378	3.73231	37.2182	25.7197	58.7946	46.0298
	38.4854	20.6964	12.1916	2.97864	27.622	23.1694	41.8258	51.7588
	51.2133	17.7968	17.0532	3.86113	40.7046	63.3822	116.352	554.474
	62.0639	46.4703	16.4303	5.27297	69.2432	20.6513	46.2885	59.7436
	45.0087	51.6261	17.5022	3.28525	59.7928	19.9073	70.7109	40.2571
	59.937	41.371	23.274	2.97618	36.2541	30.6272	38.1367	46.5862
	87.5078	21.7089	51.6524	2.60709	49.4578	26.0832	40.646	45.9595
	99.7256	18.6982	52.5834	3.19581	28.4507	20.3587	58.7778	50.1415
	60.1799	21.3614	16.1037	3.53668	32.3486	20.1603	46.7668	40.9787
	50.8563	20.985	20.2801	3.49568	29.7665	29.4451	52.909	62.8554
	64.4329	40.3802	14.3288	3.87704	39.604	23.0212	45.31	59.8499
	74.296	32.1022	22.475	3.5895	44.49	128.404	38.6201	45.8101
	35.5023	35.4248	16.9285	3.9954	39.5275	23.5783	39.8655	48.7179
	62.3321	59.9956	29.4	11.1964	47.8606	44.3412	35.9429	62.5139
	43.3096	33.2999	27.8748	3.28739	51.8264	48.9049	47.7819	58.6119
	83.6881	17.5508	17.1486	3.27	69.5634	26.1718	48.255	59.0761
	56.8999	35.6014	14.7186	3.86433	41.4093	22.1009	35.4846	68.7269
	73.213	15.2687	11.3479	4.84161	34.8921	27.6184	71.3362	35.4387
	84.229	26.5667	16.0794	3.42952	38.5055	23.9874	39.4003	94.9108
	59.3099	44.4066	15.5587	3.85484	46.2532	26.9984	44.0916	37.1366
	43.3663	17.9097	17.5425	3.35809	28.941	24.8024	40.6269	64.0801
	45.1508	96.0958	16.0036	3.90309	42.0653	18.1608	34.1928	95.3152
	38.5591	15.8183	13.9818	4.19217	44.9977	19.823	46.2011	45.6487
	92.5457	19.2724	22.439	5.98153	31.7635	20.0343	50.1859	38.6676
	65.784	28.5867	19.2977	4.35371	46.7198	26.6164	55.4128	50.2396
	319.901	16.5536	12.16	2.86597	67.3228	23.3496	61.5337	60.162
	94.0996	12.7226	13.5571	3.32758	44.5739	27.3822	54.4949	56.6081
	74.3922	26.5193	16.8795	3.17668	42.9395	110.51	44.9815	39.2693
	29.5682	20.0046	15.6825	5.22353	50.4436	15.6898	60.9745	72.1614
	108.437	26.1044	20.3061	4.61246	97.7686	20.4224	40.2809	57.9875
	40.6626	18.6228	13.5214	3.03775	37.2418	16.1052	57.5245	48.3414
	40.2516	23.8906	16.2081	3.49019	47.276	17.5247	40.5657	51.0028
	53.682	17.7721	21.6435	4.29754	37.9091	18.8128	37.2934	42.5832
	56.3497	21.8856	11.6068	3.71577	35.4628	39.0987	53.2549	36.063
	39.4706	18.9962	14.9081	3.96713	42.6673	14.4778	46.1787	40.9237
	66.2591	23.3783	15.8002	4.65304	44.2981	20.9448	36.3098	40.0106
	59.7745	21.2023	13.3686	4.01398	40.9584	21.9627	35.7281	69.8006
	40.1798	30.4622	11.8208	4.28445	42.6914	24.3485	45.3532	204.042
	50.5565	24.1959	9.75325	6.5109	37.8797	25.2459	90.3125	46.9521
	36.299	22.436	13.0966	5.82068	37.3068	21.4189	43.2375	54.4011
	39.4297	16.8255	10.0935	4.13752	46.5549	29.5982	78.5015	47.5784
	42.3573	20.4431	12.9344	20.5926	43.4638	12.2339	38.9783	43.1163
	63.4071	25.6346	9.48861	3.4612	62.2314	17.7111	37.2346	52.6462
	46.7565	28.253	16.238	3.62005	39.4901	14.6466	47.0558	58.2366
	60.3399	16.9325	11.4745	5.91978	41.0859	24.465	36.1712	83.9336
	69.8016	21.9287	13.9842	2.86809	37.4514	25.0913	42.8862	43.047
	35.1069	27.7116	13.3824	4.16373	31.6079	22.8369	89.409	49.8206
	41.1445	17.6524	17.1539	3.28494	36.8147	17.6795	45.3123	54.3711
	34.2272	23.2387	10.0578	4.3523	36.8731	24.3052	43.2307	41.2387
	53.381	33.6418	12.4835	4.03052	59.0631	16.1207	44.1196	59.9466
	47.2977	19.9502	9.74066	4.97743	41.1719	19.892	79.5971	50.705
	31.4513	25.1165	14.4764	3.37509	43.4834	19.1743	48.225	41.8611
	91.9592	8.31736	12.2586	4.22408	34.1278	23.3706	50.0398	50.3771
	46.7265	16.7076	13.7427	2.79297	47.4482	22.1833	39.0598	62.8143
	54.8549	18.0419	11.337	3.46835	40.8383	27.4721	42.5264	57.0557
	41.7166	22.9419	15.5759	2.97334	40.2808	29.5389	52.9381	41.4868
	34.0192	29.4694	12.9867	3.44865	54.6218	26.1061	29.2352	45.8554
	95.6923	14.4517	13.2247	5.41615	41.8955	28.3966	75.0708	65.6878
	30.5859	35.9943	12.7788	6.16196	37.1105	22.6428	35.4625	287.017
	56.8168	33.5825	8.23932	3.73851	40.463	32.0071	50.7207	57.9094
	58.5239	32.9614	15.784	10.015	37.1016	26.1093	68.9113	56.3845
	51.6617	19.4856	12.359	3.24626	38.6273	19.1371	48.9685	33.3621
	155.226	22.147	15.0412	3.52137	35.8128	26.5246	117.006	40.483
	73.8424	20.8833	12.1187	3.32798	36.3454	31.6295	69.7799	55.0737
	51.9669	27.7513	32.7091	5.31141	43.7154	18.5456	71.9521	39.5089
	51.8291	26.3303	13.7079	3.8579	37.8428	19.2177	76.9796	55.1254
	70.191	18.5792	13.5278	4.8115	41.5409	24.7452	93.3427	74.5346
	69.9636	18.7321	12.3807	2.88293	41.101	31.1817	50.2888	48.4094
	58.5643	19.4891	13.6691	4.92874	36.0905	19.2593	32.0633	45.4049
	58.9078	22.8842	13.409	2.79032	47.0814	36.1827	67.7406	47.7736
	43.3137	16.6209	11.8867	3.93199	35.837	16.8923	168.926	45.5601
	56.4782	18.9665	13.8668	3.76831	49.6777	23.3649	55.2732	36.5517
	105.064	18.3882	13.72	5.61102	52.2157	21.7488	45.5799	40.5087
	55.8089	19.3752	16.8701	7.76644	35.7619	11.7002	73.0065	40.5475
	109.563	38.2679	14.3068	5.13251	50.1591	19.1008	39.5004	46.2516
	39.9362	22.2491	15.0569	9.34614	45.9104	173.747	35.873	71.9494
	47.2212	23.2392	14.4838	3.87107	37.2665	23.3762	31.9715	48.6791
	40.8737	16.4342	10.124	4.81635	54.6978	26.2148	39.8353	75.1148
	61.3544	24.425	12.5995	3.70758	38.491	24.749	37.1884	39.3883
	48.8361	20.7716	13.2078	5.42116	45.3047	30.8142	44.7273	84.3424
	79.2156	34.8465	11.7552	4.57651	51.0568	29.6278	36.5827	43.8719
	41.3328	27.2918	12.3151	5.16358	40.2247	18.0564	42.8873	41.4972
	84.0416	75.3147	24.0505	7.19161	44.1155	17.4816	45.3457	42.6635
	43.5865	26.1305	12.181	2.91794	43.8258	16.7017	37.2756	58.2268
	37.1908	22.1252	21.6956	3.77676	60.9362	34.524	40.3868	50.4558
	58.2263	17.3936	11.8936	5.19271	53.3885	14.1459	48.5919	78.1734
	173.783	19.1349	40.4307	5.46342	34.9209	15.7708	35.7658	67.311
	34.197	33.7179	13.1417	5.02958	38.3692	20.7013	40.4475	48.2051
	67.1579	15.9444	16.7815	3.63735	45.2607	34.4975	41.6341	60.5311
	50.617	25.6424	14.2566	4.83312	110.801	17.212	37.2801	43.9959
	33.6571	39.7787	13.8845	3.48433	33.5769	13.9303	30.1216	43.5283
	39.4408	30.8016	9.93978	3.5878	78.2108	18.8836	46.6509	42.0654
	36.8284	18.1997	11.8184	3.97632	50.7963	29.5617	43.9352	43.444
	47.9363	35.1135	13.9146	3.95113	33.9075	19.8969	47.8834	51.5197
	69.0235	26.6809	13.5934	2.84324	185.132	18.1323	28.5857	46.3761
	31.5371	54.708	16.6017	2.47041	39.7752	17.3727	63.4832	46.1685
	49.1254	18.5536	17.3579	5.23128	43.8091	19.2289	34.2443	40.8332
	145.687	14.0973	49.1704	3.94868	37.327	18.3977	62.2771	31.8182
	59.5322	19.5249	12.8344	3.42734	38.8787	139.103	40.1447	80.3577
	55.1183	25.5628	19.005	4.44383	42.7396	19.1696	36.3588	48.1449
	29.5286	18.0658	14.8869	6.04492	44.7582	26.7285	32.8301	136.416
	60.1695	25.1081	17.58	4.08621	53.5778	19.1767	53.1405	38.6168
	50.3148	57.4484	17.3244	5.41694	46.8983	20.3198	57.5253	159.569
	43.36	19.5588	14.7233	2.02987	41.4596	18.6635	27.601	72.3916
	39.9951	79.5626	13.2063	7.09038	44.0714	24.6432	40.1429	51.6865
	68.3569	17.7186	14.6603	5.96722	75.1843	24.0516	40.9673	34.3716
	60.0265	24.5801	65.5698	12.9084	46.9199	14.3794	56.076	34.2466
	37.8926	13.9996	12.673	3.57706	40.6684	21.354	35.2738	45.3996
	31.3038	26.6608	18.2738	1.53634	43.1861	24.0219	40.0733	52.8106
	71.6327	18.0529	9.88219	3.27441	36.4557	34.3393	32.9039	48.6411
	33.2515	23.6273	18.7831	3.38624	49.749	17.3194	27.3723	132.172
	57.23	20.1525	12.2393	3.97467	82.9468	23.9185	43.9112	44.9749
	45.0206	20.902	14.312	4.56983	43.9611	24.2331	32.6714	55.1966
	30.4019	16.7385	10.7677	4.25144	43.3233	31.1626	30.753	39.2862
	36.0927	13.9158	11.3531	3.98177	64.5019	18.7151	36.5831	40.8087
	47.6761	19.9595	15.5058	3.92018	42.6484	18.2869	40.5777	34.7578
	58.1636	29.4658	14.5544	3.44566	40.4701	15.5473	38.2479	43.2157
	64.2233	24.1174	21.4162	1.87848	35.7351	19.3368	35.2891	37.7189
	81.9987	19.3712	14.4176	2.56814	27.9943	15.0957	41.3827	103.947
	38.102	17.5208	13.3337	4.45169	56.1838	20.272	31.5058	135.173
	21.5853	23.1829	15.1572	4.65708	72.199	17.9808	49.5065	32.3755
	39.6411	15.1194	14.7315	2.46582	81.1297	19.55	35.6442	72.0573
	99.477	21.2757	18.9323	4.83348	40.0343	21.9989	45.4409	31.2902
	40.0922	30.8402	9.37105	4.38001	42.9817	20.2348	37.1785	63.4468
	74.3405	17.2889	14.5267	3.70819	29.5142	16.6995	76.1419	57.8114
	61.1806	21.1493	9.58431	3.31543	39.1047	24.3027	46.8534	38.1204
	29.4831	28.5774	10.2397	3.40935	27.9159	18.8911	46.4946	36.949
	31.9331	15.6366	13.1494	3.66496	28.5231	19.9199	37.8986	51.7345
	38.974	28.6751	8.23755	3.50951	42.7642	19.5866	47.2096	44.6764
	56.1263	45.6998	14.6461	3.05161	32.7473	19.2316	60.4097	57.4358
	49.1312	20.6892	9.27143	5.83101	42.0924	15.0342	47.8712	104.084
	40.7776	90.7884	19.8799	3.55484	32.3392	12.4247	38.1279	56.568
	42.6883	25.2514	8.94786	4.52169	53.9629	21.5453	32.1027	48.3956
	78.6941	18.5437	15.0094	3.48949	31.0194	23.3917	50.2197	50.1877
	42.1427	20.3435	16.2145	3.82336	38.4626	18.2697	41.0917	37.862
	45.2158	29.4151	12.0539	6.67697	41.3412	17.1138	63.8472	38.6126
	55.3627	19.8687	12.0336	3.94341	35.6875	16.199	58.5486	36.9611
	67.0531	26.261	13.1048	4.47964	101.654	23.5983	57.035	41.5435
	22.5496	116.487	10.6118	4.49903	32.4643	27.6548	66.6639	53.3152
	42.6234	19.5017	10.0028	4.00023	39.4892	23.5855	45.4061	37.1572
	24.6661	34.0213	14.887	3.97642	33.318	16.6984	73.9473	30.1496
	65.7622	28.7726	18.7156	2.74988	188.37	17.6213	80.4726	48.5052
	54.9179	40.5846	13.1857	4.07929	29.2124	16.958	39.6598	33.3962
	37.6263	19.8278	12.7478	4.29551	27.0818	15.2372	41.6137	44.093
	101.266	20.0947	10.6474	4.82325	46.8605	16.846	28.6624	38.1824
	61.3921	27.4705	12.577	3.41203	33.3469	21.7101	36.8904	29.2218
	63.1512	24.4355	9.84823	5.121	31.6986	42.0907	55.9508	43.8877
	50.7529	34.0694	36.0046	9.61321	33.7314	19.2476	41.8117	37.4935
	45.6378	24.3866	14.4426	3.16935	30.9137	23.0269	37.703	54.758
	444.354	21.7901	16.716	5.19825	29.1328	17.1096	56.899	207.584
	48.6295	18.0597	13.017	3.52894	33.3422	28.8933	45.9197	61.3828
	49.1881	22.6009	11.4621	4.09325	42.2946	22.7173	77.8697	40.1134
	49.0329	19.4104	12.3728	3.52636	36.581	19.0204	41.1096	37.6049
	81.8578	12.9465	15.0945	5.38814	46.6108	20.5633	42.2429	43.7734
	57.0904	67.307	11.3193	3.27267	41.6941	16.2987	47.8724	67.3353
	35.7974	20.3115	10.8668	4.62225	46.6189	17.093	42.3177	54.6387
	50.2646	17.0907	8.79667	6.58147	71.3997	21.8685	38.4329	38.8386
	37.1587	18.9141	10.6083	11.4778	34.3484	18.8038	32.9301	50.1533
	38.0199	33.8044	11.3532	3.4722	51.3	20.9264	42.2939	39.5976
	30.2234	12.3777	9.80206	3.92436	66.7153	20.4293	33.8917	51.2616
	55.7301	16.5706	9.54936	4.17369	37.4607	20.2724	41.9616	41.2732
	53.8504	20.6349	13.3422	2.71658	32.4467	21.0656	55.3144	74.1697
	34.4368	19.3405	16.8758	3.73872	36.5953	26.6905	33.4241	70.2418
	51.4266	22.7471	18.7289	3.54879	36.955	22.8812	41.101	46.7779
	43.094	20.3761	12.7678	4.26282	36.873	39.4977	41.2504	50.7897
	33.9633	18.3156	9.52012	3.22018	36.309	19.0496	34.819	51.7144
	36.569	21.4969	16.1547	4.2393	40.5287	27.6853	37.7907	46.0263
	32.0182	15.5595	11.8945	4.6698	77.0664	18.3702	35.1249	47.6469
	40.8551	20.9783	9.69972	3.62087	33.5319	21.4103	34.1928	50.4656
	38.5959	22.9149	27.527	3.20636	99.5933	24.4372	46.9043	41.8447
	44.6793	98.5086	12.2891	3.91651	66.0665	23.5273	38.8206	57.6545
	34.0164	18.4464	16.6931	4.90942	37.922	22.1543	32.5639	65.4994
	54.8441	20.5455	15.3178	5.66411	35.6575	41.3345	126.667	152.99
	74.0612	19.6236	10.0209	3.08102	32.8217	28.7268	61.5783	45.4285
	47.7039	21.9371	13.0677	1.54669	38.634	22.1633	47.4283	80.0274
	26.1757	24.0116	11.496	2.05569	32.1033	17.3692	29.1761	43.0686
	52.1322	21.7282	14.1638	3.52966	77.4183	25.3488	41.9594	32.3876
	97.177	22.0858	13.5308	3.49717	34.9089	20.4724	45.1935	58.6053
	36.6225	20.2441	31.5741	3.8123	36.2828	33.0094	28.0321	36.2247
	56.9877	29.2447	14.8404	2.98169	41.292	15.6791	86.2041	185.853
	42.1874	13.4977	30.4564	3.08479	124.625	17.8195	39.4413	49.6032
	52.3397	19.9337	16.6024	3.38026	38.3139	17.2689	50.0982	46.6635
	159.685	17.7033	20.5263	2.7148	41.4962	20.1154	65.0883	45.0789
	34.4488	18.0523	14.8778	4.87187	32.0167	17.7828	71.4753	47.7019
	54.9803	18.9647	13.7891	5.49505	79.9742	16.6845	29.7501	168.528
	37.5614	19.65	12.1523	4.48122	36.3626	27.4469	68.3582	51.0539
	34.464	16.9622	11.1532	4.26007	51.0439	18.9387	33.3616	40.9098
	57.7389	17.8381	13.0087	6.29538	40.675	16.3743	110.467	61.737
	75.3794	20.4668	14.9106	4.55905	44.9557	17.8314	45.5755	43.1556
	39.542	33.142	12.8104	3.59717	48.2006	24.6288	74.3249	36.0111
	30.2328	18.3418	12.7731	3.19093	89.608	17.5788	34.0644	35.6
	62.3392	23.3156	12.5079	3.34466	39.2928	25.3352	48.277	43.0528
	38.3058	14.9758	13.3799	2.60376	37.5	20.0082	48.5322	44.5787
	72.93	23.505	14.1303	3.83467	50.5073	23.2258	45.5376	35.9055
	41.8943	37.3465	11.5515	18.0057	44.1893	20.4077	38.3357	39.5848
	59.0118	18.8511	12.7956	3.90423	61.1206	18.6299	37.0493	51.4043
	55.6031	33.9855	10.0144	6.69869	72.0183	20.7337	69.9658	35.3247
	40.336	46.333	11.5056	3.16252	34.557	24.4336	43.7684	52.2469
	55.9522	19.4628	17.7779	3.72061	51.5774	25.3398	48.3116	42.5114
	48.4562	21.5	11.2454	4.42187	47.0206	25.1686	62.5534	45.0141
	51.8295	28.7947	12.1168	32.633	36.4739	22.7433	55.4437	48.8116
	36.9063	32.4242	9.73532	4.96045	63.19	27.9548	28.9879	40.3255
	39.0067	14.5155	13.1829	4.57635	58.3253	22.1551	51.5638	36.0028
	34.3807	18.1822	11.2112	5.5916	55.6804	21.0909	33.4441	33.457
	28.7666	18.6026	12.5918	3.46766	65.866	31.6069	30.7654	45.196
	73.9997	25.1151	27.027	3.34584	43.7548	24.8818	37.6377	45.8622
	51.2101	21.745	13.4449	3.91976	35.5907	16.5063	54.0765	38.4739
	35.4817	24.4197	12.2225	4.21478	30.4384	49.5969	52.7517	46.8676
	27.7802	20.1218	13.6124	8.19309	52.9569	21.746	35.3059	40.1291
	33.3848	28.2166	23.0769	3.61916	162.855	16.4913	41.7473	42.3222
	80.5353	21.2102	9.64087	6.65921	39.1276	30.4618	51.0006	50.9525
	65.6712	15.024	15.5095	4.87758	43.3696	42.4087	47.0746	40.7283
	80.1158	23.1862	7.7351	4.80821	36.9306	29.6533	47.9903	46.4799
	37.1224	18.983	11.9675	3.87107	76.7119	24.9243	37.8869	213.368
	65.8892	20.0484	11.025	4.64523	73.7326	22.7013	43.2582	52.7473
	72.8414	17.0175	13.4479	4.03951	43.9348	19.8107	50.6187	112.551
	33.8826	26.4671	12.3727	5.1292	61.4994	26.4256	40.2431	61.2656
	34.4453	15.4776	11.9969	4.67014	40.9137	20.3537	56.7776	200.58
	40.0843	18.4887	9.37682	3.35743	38.9532	21.466	32.5287	38.1958
	39.5573	18.477	33.2879	3.05577	37.8732	17.3058	44.6912	41.5394
	49.5629	20.9624	11.9357	3.64285	39.7416	26.731	33.0134	52.9475
	44.7894	20.9288	12.7275	4.48275	31.9118	15.5916	47.2343	36.9232
	80.8537	25.2476	13.4229	3.61271	58.1083	20.6188	46.3746	38.782
	75.4144	16.8493	14.3331	2.72274	35.9646	18.9398	46.7768	54.4907
	25.3467	24.7624	13.334	4.31554	45.5675	73.926	33.8734	31.0929
	55.3849	26.9819	13.4198	4.92684	48.7751	23.8854	48.1928	42.3369
	28.1284	33.0318	16.0491	4.93193	39.4599	38.9572	44.3433	48.4197
	59.0035	19.0046	15.543	3.45074	66.2129	26.1876	57.5323	49.6817
	27.8964	24.8822	16.3861	3.18287	46.6181	30.061	36.5484	53.6967
	61.243	26.0269	24.524	2.46642	35.7996	14.8344	46.7014	40.5777
	76.9646	16.646	13.1744	6.02123	27.795	21.3149	30.1428	44.4048
	34.8954	26.7946	9.89972	12.2341	44.1169	30.2236	62.0019	40.7578
	48.0628	17.185	16.4773	4.78644	32.245	21.0643	75.0009	35.0087
	44.972	17.1422	11.2813	3.2625	40.9024	15.5777	80.6071	39.8247
	41.279	36.5025	17.8244	3.35781	28.1392	11.9377	63.1367	39.6365
	73.82	22.9648	13.8706	1.85445	67.4219	16.0637	43.2559	38.4575
	88.1184	18.2724	11.2036	4.50298	31.2062	24.7567	58.0414	26.1157
	40.3694	80.7513	18.9518	4.28445	64.6757	32.2782	37.7554	61.8882
	28.2172	19.5598	13.0337	2.45248	33.5802	16.987	56.2926	57.835
	56.8575	18.5436	11.7169	4.78067	42.9453	34.2433	57.7374	73.8703
	25.7358	19.9821	11.347	4.20791	38.0122	29.2802	64.3322	42.2419
	35.3741	21.9284	10.8583	6.13055	33.9537	13.7927	39.9054	90.6093
	80.0334	20.9167	12.4591	4.79951	37.3522	21.0539	128.688	48.4879
	67.6724	24.9505	12.4777	4.91678	42.376	32.754	53.9842	51.0116
	41.5873	23.3241	12.695	3.22546	44.2585	31.1837	42.5475	54.7298
	55.3997	62.3665	14.7582	3.33958	32.8797	22.0578	37.5088	28.0309
	52.0597	34.4651	11.2358	3.96064	44.6388	21.7081	40.3392	55.6119
	71.9302	28.4406	11.7688	3.90129	33.2811	28.7792	46.1437	82.0902
	28.0068	15.8289	10.842	6.78067	39.9955	15.8287	41.8322	44.7123
	33.0786	22.8646	14.6788	4.32031	89.602	25.3469	44.9567	35.9108
	36.0173	20.309	12.4822	3.29414	64.0178	16.1586	101.238	64.6969
	74.0998	21.4337	13.065	3.49255	44.4666	29.0351	36.1819	46.2769
	47.4425	31.1723	13.6689	5.73721	32.016	13.8723	46.7175	52.8912
	68.1512	31.1805	12.9906	3.52199	34.25	42.3645	37.5083	61.0404
	84.2979	40.694	11.5097	6.20283	115.585	18.4532	38.4258	49.1792
	29.4832	27.4631	11.1808	5.74982	41.8199	19.3502	49.0636	120.801
	27.2644	25.8785	11.219	2.93124	37.2256	23.2125	50.2263	64.4203
	38.4215	93.9704	12.5084	3.20071	69.6618	15.5697	42.4304	72.2236
	69.0426	31.132	10.4662	3.9438	38.0511	17.733	117.772	46.4459
	50.354	28.0602	13.1916	10.5945	42.0198	23.9337	38.8453	54.9656
	40.2477	15.9855	11.8678	3.52347	38.0863	15.6738	49.3986	40.6843
	36.6303	17.6162	19.5837	4.82442	41.8343	22.5857	40.2455	39.4295
	53.1671	20.5385	9.42867	5.04127	37.0315	24.4847	36.2736	62.5698
	87.7874	21.3638	13.684	5.48138	36.8789	20.5023	46.6908	80.7657
	41.9506	21.747	11.708	4.80252	40.0946	19.2365	53.9559	42.5646
	34.1195	22.5974	13.649	2.04328	49.1071	25.5016	88.2762	55.3444
	31.518	20.2663	31.7117	4.30023	39.3457	27.6563	52.9681	41.9097
	53.2934	26.756	21.2931	4.12363	33.7266	16.1503	38.696	39.1862
	44.2332	23.4158	9.45298	5.65835	39.4221	21.9515	48.3916	94.4916
	94.7126	41.4988	11.5739	3.58617	35.7176	23.8657	69.2679	42.9902
	101.77	23.2275	10.107	7.73106	37.3614	14.5941	49.6856	54.6922
	24.9841	47.4051	12.3038	4.52084	38.763	21.7677	41.1651	76.4593
	61.5685	41.5511	12.3405	4.73633	31.0851	16.9738	30.9006	41.4322
	153.014	18.3802	10.3935	3.21529	35.3976	43.7145	42.4093	52.0273
	62.5852	18.4814	11.6955	3.38744	30.5312	17.2291	46.2221	55.6835
	37.9574	49.4629	12.2818	4.36476	37.8231	23.8657	44.4344	51.7594
	40.86	26.2523	10.3518	3.51202	33.232	13.4415	30.6884	71.9067
	38.1632	27.9324	13.6535	2.40551	45.8473	17.2353	46.7944	51.3703
	44.4045	18.5789	16.8417	3.16538	37.817	20.8635	43.8097	68.5607
	51.9226	19.2308	11.5134	3.7544	37.8845	19.0279	45.9363	40.3863
	48.7568	22.4864	10.3193	4.52084	48.6694	14.3405	47.911	53.0864
	41.3769	17.6332	16.2738	4.36986	44.5831	21.3327	37.2857	117.647
	48.8508	28.6482	22.7617	2.79746	34.6811	16.4017	42.8775	120.365
	41.7205	38.3214	20.6324	3.5737	44.82	28.6913	45.2555	50.3823
	30.8585	54.2955	8.11561	3.51181	34.351	17.796	61.064	49.0494
	33.7346	16.8479	21.8824	6.36372	32.4171	16.282	49.6006	55.6602
	42.4573	49.8032	23.4984	2.96625	33.1053	16.1876	39.4466	45.5754
	37.5562	74.8538	12.2378	4.43291	44.1828	18.1978	46.1007	55.0244
	55.6086	56.6677	18.4105	5.84353	32.1282	20.1266	40.0075	59.8886
	49.1443	23.2186	11.4904	2.7479	38.5002	21.3872	43.2658	64.0082
	57.8271	19.7934	13.588	3.61015	39.7202	27.9843	33.9287	65.3382
	38.8849	19.8331	15.7406	4.97099	35.6283	20.6878	46.7929	32.0708
	156.824	30.2655	16.1719	3.98191	51.1567	17.8289	30.1252	37.4303
	29.2525	64.0092	10.3777	4.32683	37.5521	20.2001	51.8955	43.1837
	50.6799	50.748	11.8473	3.99071	53.1438	25.4011	51.9308	49.1146
	34.2772	35.5206	8.65153	2.95154	42.0328	17.2604	29.5878	46.7939
	87.0518	56.3266	14.074	3.82917	49.9251	14.1408	31.9358	42.3517
	53.3981	72.7114	12.3814	5.50353	30.872	15.4894	31.9659	61.2246
	106.013	26.4729	10.507	3.8845	32.8849	23.6286	50.5418	40.8275
	64.0931	18.1055	10.998	2.67964	56.2583	15.6541	43.8745	39.2138
	57.2224	126.786	9.78338	5.6657	34.1258	22.8004	36.3327	82.4967
	54.1312	25.2802	9.84199	3.00505	42.5386	11.5385	35.6453	44.9044
	119.333	35.8701	16.3896	2.53269	34.1808	18.8519	52.1358	29.3781
	39.481	54.8193	12.4367	2.87544	64.9253	19.2941	35.5908	110.453
	39.4408	35.0318	10.9862	3.95216	45.3518	16.0618	38.9641	46.0168
	33.893	17.5976	12.1321	3.61185	35.7966	32.2559	44.6245	54.0418
	45.8652	30.8734	13.9975	4.35032	39.0333	22.1068	48.1497	62.6994
	35.7529	62.2422	22.8983	3.32146	41.2324	21.1987	73.8277	40.1517
	35.1605	22.1356	12.4614	3.50235	36.7596	29.0278	43.4436	76.1518
	79.9824	26.4604	11.5233	3.96276	46.8483	14.209	61.7981	43.7573
	59.21	35.1926	10.1035	4.35143	35.9592	14.4956	41.4489	52.8006
	60.3969	27.6952	11.8652	3.20629	40.3293	16.1792	75.556	47.5284
	81.4837	26.3761	12.4903	3.9384	40.2644	26.2777	52.5837	77.7993
	60.2087	24.0805	14.2304	4.63132	37.4646	16.592	40.9323	81.9237
	56.4226	17.4817	11.6174	3.83633	42.777	93.4964	47.4237	43.3852
	46.2408	20.7896	11.223	2.9388	66.4946	30.2099	38.4934	45.4521
	48.0581	25.0383	12.8113	3.30895	38.1493	30.0205	45.4042	33.8637
	48.0953	28.6967	16.1296	4.22619	38.5176	18.56	42.9605	37.9543
	32.2322	25.2747	11.4833	4.13985	36.816	17.3654	43.885	23.9259
	62.6429	19.8357	12.5991	5.39049	36.2714	20.4443	47.8391	34.3643
	40.6229	25.4189	11.7149	4.33321	46.1561	26.7804	47.6566	30.5531
	35.3278	23.038	11.0995	3.71197	44.8777	19.7445	30.8272	45.3666
	58.3451	50.3395	8.82391	3.2237	40.2176	23.0844	43.4651	472.866
	42.4363	13.9847	10.2111	2.85445	63.5802	23.8226	37.8927	46.3337
	33.7979	24.2958	11.6248	3.87882	52.3923	43.9652	55.1443	40.5941
	60.1339	21.2409	9.63978	5.91617	50.4573	22.6132	38.9385	44.3817
	54.7451	16.3633	16.0165	4.01618	41.4895	18.6524	39.6551	55.6997
	21.3131	24.4691	10.7499	4.83596	48.791	18.6922	47.2244	49.6593
	101.542	15.8435	12.8374	4.14467	52.467	31.9989	46.0132	44.3365
	31.1391	34.7747	10.1401	4.09517	42.711	18.1116	42.9792	35.2608
	39.4024	22.541	10.0147	4.67414	40.2311	20.9912	37.37	53.0215
	23.8687	18.0432	10.9577	3.01177	39.8614	33.3454	45.6598	43.4474
	29.1156	22.8251	10.6309	5.50858	45.8495	20.6057	43.6977	39.5389
	29.2744	26.1941	15.5738	3.99674	47.974	18.8404	48.5989	40.358
	24.932	29.6785	17.1908	4.94475	34.8422	45.9177	38.231	47.7706
	45.8168	20.5719	13.1217	6.54712	39.7417	17.2305	44.4927	73.5103
	69.9496	27.1919	11.6259	5.78656	42.8668	27.198	36.7009	71.8911
	28.8235	21.8244	12.5253	4.60158	49.5891	22.5173	38.522	40.8908
	54.9839	46.8002	25.248	2.53459	48.4325	15.4738	39.3177	68.0819
	43.0715	26.8584	14.8509	5.68172	40.7991	26.3896	43.1378	61.6429
	39.9218	20.4555	19.3186	4.00405	47.9656	22.7924	63.3926	63.4769
	47.9684	20.2829	15.206	5.23178	35.7024	24.2517	40.5235	46.5006
	49.9547	17.8323	16.6467	6.17122	41.2805	21.73	29.8978	53.5094
	26.6932	41.4035	14.0784	2.73105	45.9053	32.2743	38.5247	55.747
	50.9098	19.5214	12.7459	3.15408	34.2337	27.7721	51.9102	47.8666
	50.7702	22.1884	12.1253	6.72629	33.2812	25.113	37.1238	58.002
	51.5432	36.5318	12.7505	4.30527	105.71	33.9428	31.9296	42.4547
	53.5479	21.5642	40.2062	7.36607	36.4241	17.7165	38.8584	59.5491
	59.9307	23.8231	15.1788	2.97195	65.2738	38.5665	53.1817	36.7341
	24.7783	17.5155	12.2928	3.41423	42.6585	19.2153	62.1832	69.8485
	48.4493	27.2541	29.8213	4.52001	38.4665	27.4124	60.1933	78.9388
	42.4364	37.0219	14.8286	3.63733	43.4411	18.7092	70.4146	41.3507
	49.5131	15.7185	14.302	3.3212	42.7104	13.6221	49.9548	45.7267
	94.6217	16.9019	14.7892	3.18742	44.6767	20.6463	35.7509	267.918
	59.6926	18.2198	17.3447	2.7849	45.5293	20.3506	29.8117	56.4145
	27.3579	23.5384	12.2307	2.25899	35.8577	19.2247	36.229	43.0775
	33.4143	27.1888	11.6173	2.04413	37.5818	19.162	39.5886	45.663
	66.5861	22.5389	13.9715	3.47469	43.2524	15.5878	48.7637	42.7882
	52.6127	28.3339	10.1077	3.60092	46.5284	28.8436	38.1765	39.5028
	40.2379	43.5877	14.7078	4.51705	36.1084	20.0192	39.7614	23.8292
	51.2537	20.0141	15.3124	5.06575	41.5502	18.6361	45.4227	33.5707
	30.9796	50.069	13.3788	3.59032	36.85	18.3803	44.5316	59.2923
	106.87	25.9507	15.6237	4.14138	36.2766	25.5567	83.0886	44.2985
	53.4423	20.8727	11.4124	6.41503	43.2273	23.3022	38.1129	55.7493
	29.2749	19.5901	28.8774	3.55721	36.5905	31.6155	43.6704	45.6286
	47.4275	20.9606	9.19743	2.93661	44.2272	26.9586	42.5517	43.0421
	53.0703	19.8808	10.1483	3.48845	46.16	20.8833	39.7592	40.4456
	76.4163	18.5676	12.4458	5.13434	30.9675	37.433	43.0782	59.4841
	40.1908	31.5218	10.0395	2.99317	38.1782	12.9233	41.1022	52.3876
	50.9204	21.0119	13.9677	2.50485	47.2766	29.6545	30.2576	36.8223
	49.5552	17.0575	12.5826	5.54771	34.2436	33.804	36.8328	50.579
	63.8509	16.5892	27.0678	4.09292	41.3371	19.2846	34.0805	41.1119
	44.3722	53.3154	13.3446	3.65854	40.0858	16.2577	52.3774	34.201
	72.9557	15.4988	9.53627	3.01115	40.7732	14.8432	28.5214	58.5503
	47.781	18.0958	13.9043	3.56588	34.7785	20.163	77.7652	45.113
	38.4483	16.1829	12.3433	8.34179	30.1857	22.2435	45.059	45.6745
	52.5799	24.9036	14.13	3.98745	30.7601	19.2184	38.8848	37.5292
	47.5612	16.613	18.291	4.02169	36.1605	34.0825	36.7099	60.7284
	58.7977	19.8887	13.0373	4.79631	37.5036	28.1161	51.2992	46.7022
	42.8571	19.7184	14.7828	3.66364	48.4011	20.6505	33.1639	37.5963
	39.4394	18.6119	12.9481	3.40564	56.2695	16.932	39.8335	51.3993
	41.1306	22.0616	15.6602	3.98164	42.876	15.6801	74.039	63.3175
	59.5227	15.5839	25.7979	3.79002	44.8624	16.0722	186.485	89.1403
	59.9766	22.3072	13.2223	2.97665	38.0594	44.184	34.0761	35.4985
	30.1615	23.2426	17.4886	3.49355	41.0759	16.0358	29.1846	50.8023
	57.2862	61.8569	11.8156	4.70264	35.5757	20.5191	129.809	45.8683
	63.5991	15.5517	6.44825	7.60126	45.9334	18.94	42.5689	70.7546
	56.028	30.3979	13.7958	4.52454	40.0782	18.5915	40.2722	57.5725
	46.9553	24.4028	18.2945	4.73083	45.2735	19.0162	27.4434	57.873
	38.9465	22.183	12.4372	3.83421	54.294	26.1012	36.0971	72.248
	74.0893	32.5448	10.6501	5.33321	54.988	23.4069	60.919	61.9408
	46.8268	30.4206	28.2895	3.90516	55.8442	19.1241	60.6274	55.4462
	29.2976	53.4314	12.7039	5.42073	58.8646	22.9797	33.2544	60.9809
	42.86	205.452	17.6705	3.19147	46.849	17.7724	83.9118	63.4457
	67.8954	31.2074	17.9344	3.52413	97.6663	23.2878	47.3625	43.2157
	69.0681	13.8515	10.0246	4.88159	56.9335	13.8629	39.7775	44.542
	61.3237	25.2779	20.0201	3.13478	43.0228	17.0976	70.0916	84.657
	49.2973	19.1133	12.2698	4.3935	40.1813	15.2071	47.9775	88.9687
	63.8574	20.6231	20.0301	6.25525	44.7986	31.0946	36.9819	36.5566
	50.1336	24.5943	11.2349	3.50165	61.786	31.3976	41.8178	48.1291
	72.1913	26.5482	15.6627	4.46319	47.5526	24.0145	56.1109	67.3004
	47.4704	22.2721	44.8933	7.95646	40.552	20.13	86.2713	48.3534
	46.9447	22.3606	11.5665	4.30454	44.4575	31.4867	26.907	32.6095
	103.325	15.1901	12.4089	6.82062	64.7458	40.3745	45.3623	36.6817
	37.7736	13.6531	13.9763	3.18272	51.0392	35.564	44.7502	47.9675
	52.8788	18.8053	17.3905	3.4103	49.3417	27.363	46.0551	286.729
	55.5006	21.8509	21.6091	3.86248	38.9401	21.146	64.1508	251.315
	88.4929	19.3971	21.6252	4.09372	48.194	14.2687	33.6879	44.3064
	47.2577	26.26	12.6581	4.38335	39.317	24.6389	55.9105	40.431
	84.9785	16.7166	13.6649	4.20622	43.9704	18.1696	59.7028	70.173
	90.9508	13.3368	12.8146	5.2771	45.4682	20.2886	46.8796	43.2606
	25.7353	15.3689	10.9786	4.03278	41.3058	20.9937	33.6597	58.3086
	45.8293	22.7883	23.472	7.20939	38.6662	14.0064	53.7073	52.3772
	33.1066	26.0759	19.5641	4.32149	40.1294	22.5194	46.4802	39.8973
	45.7023	19.0538	25.8198	5.81601	52.8758	23.3877	53.2601	69.4247
	46.9286	21.6623	18.7406	7.27092	41.2508	19.4776	71.7622	40.9701
	29.8756	19.3242	17.5686	3.49185	48.6258	31.6451	48.2938	49.3203
	46.9637	26.021	14.6899	6.35264	44.8062	29.4707	68.3047	71.6497
	43.561	18.3967	13.9096	5.79255	51.1124	25.6589	63.5477	49.431
	83.7962	26.2974	21.9874	3.17997	44.6784	20.4797	60.0273	49.8856
	221.373	18.77	17.3522	7.62299	41.255	33.1597	35.9317	80.1022
	186.832	24.4965	26.6773	4.70754	45.5072	16.9386	38.9538	41.6202
	38.5747	21.3435	11.2597	3.78867	43.0821	25.2663	46.8961	48.0034
	33.1958	20.7873	16.9291	6.43138	46.9824	19.6332	50.189	48.149
	51.5337	25.9405	10.0245	5.52501	38.9281	19.2672	40.1488	58.3443
	32.5784	26.4776	14.1615	3.07508	133.342	27.408	32.6989	52.7484
	62.6602	36.5662	20.8788	6.28659	49.1158	17.9247	33.3883	34.4456
	64.4423	20.0345	7.53878	5.68351	39.5417	25.3926	37.1825	57.4227
	93.6287	18.9001	10.6129	6.0558	54.7009	21.1967	33.9058	33.4975
	52.9341	20.4623	14.384	4.02987	41.5367	31.8056	33.7041	68.9903
	128.888	22.1942	14.6235	4.63874	38.0183	18.9805	48.2388	71.4297
	46.401	23.7911	8.06967	6.50816	56.3726	19.745	38.3181	69.6904
	61.7493	17.9069	12.3566	4.17122	53.2919	16.9749	60.2251	47.6197
	34.264	19.1735	12.1571	4.30005	103.533	24.1036	41.2221	45.9584
	47.5311	22.4346	12.8877	3.72588	43.0402	23.4904	36.6866	42.0757
	47.8368	21.6905	13.9184	3.20956	44.4042	44.9194	59.3057	35.4814
	56.0322	15.7405	15.1138	3.8443	42.1151	21.5758	45.3136	45.2676
	53.915	23.2894	16.661	4.2556	54.9502	24.6866	56.8075	52.8944
	30.1887	20.5736	11.2013	4.61062	43.9184	12.8503	31.6168	42.1422
	41.2766	18.4238	13.3481	6.85177	77.1865	17.5476	44.6583	46.2234
	45.8044	28.4406	17.6228	4.07404	45.0173	22.2021	35.2774	42.3089
	68.0396	23.5802	14.813	4.23791	37.8676	29.3844	83.7542	35.2419
	58.5135	22.0632	9.03663	5.29174	50.8439	23.1763	46.0989	36.7144
	43.6727	16.5258	35.0775	3.72252	40.1285	24.3024	31.4807	45.2243
	46.9391	18.9275	15.7243	3.56749	45.7072	18.7849	37.1076	54.5158
	45.1608	20.2979	11.3328	4.59768	46.5731	44.2025	39.7624	34.4573
	38.6025	22.5662	11.4299	3.26007	71.8961	15.512	74.2398	51.9102
	52.6638	17.4137	11.6524	4.56055	37.193	22.4231	50.936	43.2288
	55.3025	21.6183	10.9466	3.39669	143.233	19.7327	50.9973	53.2783
	44.2108	55.3781	9.38129	3.52143	49.3553	16.8936	48.3517	90.6071
	51.2936	23.9927	11.5607	3.34141	44.3523	25.2462	42.4944	62.5812
	39.877	17.3997	11.8345	3.54357	39.3046	14.9678	33.8693	35.865
	65.3789	16.2018	9.54416	6.27856	43.1924	27.9151	42.4948	50.3138
	67.4671	18.6301	11.2866	4.98944	36.2518	43.1527	51.7277	52.708
	71.7819	19.0403	18.0525	4.73232	41.4275	22.8691	30.4694	124.825
	54.7209	13.4353	11.8813	4.08503	42.6338	17.3602	44.8516	81.7617
	40.863	56.0169	16.4106	4.84815	39.9263	19.0934	40.9365	64.7161
	38.6321	23.4179	12.3904	3.41758	39.1931	19.6616	51.5064	47.1621
	37.6503	14.8771	12.9404	5.91308	43.9894	12.8635	100.014	39.8513
	53.218	22.418	11.174	3.84975	42.1299	21.6802	42.8556	42.5979
	52.502	18.092	29.7162	6.59182	40.8641	22.2816	43.4569	57.8894
	210.2	21.4298	9.7409	5.14386	44.2965	14.5809	48.0579	47.0888
	46.111	23.5113	10.3686	3.00458	51.3524	16.8854	38.9565	57.382
	141.164	62.3325	11.3386	3.91947	45.5508	21.0485	54.5569	40.6584
	61.9787	13.691	12.4451	5.61339	67.1029	26.0346	37.1873	53.3178
	57.0902	26.2226	10.2085	3.98422	82.2545	18.5671	46.4167	49.4421
	110.435	13.6619	12.7597	5.72287	71.8567	26.302	54.0232	64.0369
	54.4656	21.9451	12.5327	4.01814	38.2103	20.06	54.8761	39.5006
	39.2254	15.9472	18.7105	5.8115	62.7987	15.7358	43.0282	37.808
	58.3186	18.2373	10.4647	2.64445	54.9423	16.8659	47.0383	53.9167
	58.5099	19.6358	37.8366	4.76341	121.831	24.2839	47.7661	51.6158
	62.816	28.0773	14.7157	4.12084	79.4115	18.7545	33.8273	45.7315
	45.3105	20.286	8.686	5.9862	61.0954	19.2305	43.9269	36.6314
	46.6512	15.8407	12.3071	4.29007	43.4216	21.2849	31.3394	129.107
	63.2824	12.8831	15.9713	4.23653	46.5585	27.4997	34.1571	36.5609
	42.4478	13.4863	16.6742	6.52308	48.668	25.4375	55.1704	32.6408
	47.9228	19.5762	11.9968	5.67464	38.2617	20.2082	50.5249	40.2166
	25.8508	19.5981	12.0613	4.53243	46.3102	20.7503	31.0163	51.1612
	127.444	27.9845	10.7025	4.53002	44.4173	18.8983	47.782	32.6549
	36.1952	11.9446	10.251	2.75991	42.6699	19.037	32.3761	53.2082
	46.7791	18.0671	12.828	3.94598	62.4775	18.635	53.5594	46.7474
	103.682	29.3236	12.8887	3.39822	49.3847	42.6462	44.8983	47.9243
	41.8256	13.5837	13.9395	7.13545	39.6861	18.5578	38.544	116.492
	29.1212	21.2684	9.95335	6.94964	41.006	31.1827	24.8824	83.0622
	39.6149	16.7343	11.9677	5.72856	152.953	10.1504	32.6714	59.389
	34.1129	25.6566	11.0143	4.77806	39.7731	11.0509	44.482	29.6102
	37.2852	20.2085	9.72964	4.95794	40.67	19.4423	43.1532	52.4339
	43.6375	22.1256	12.0685	7.95484	76.3273	19.5965	56.3396	31.8956
	35.3042	22.7889	12.4834	6.9315	68.6155	26.7536	40.2166	51.3112
	57.9709	20.166	11.3773	8.19309	104.218	13.9307	44.9413	37.4741
	54.3204	18.2272	13.6722	3.28681	88.4532	26.0258	38.4263	34.8546
	46.9444	30.5108	11.9675	3.74225	48.7812	22.271	29.8027	34.6122
	38.0492	18.899	11.4624	5.32681	42.733	21.2349	30.7779	106.338
	62.4292	21.5047	9.98587	3.68962	44.2604	18.2938	63.4181	48.3735
	58.0695	12.7173	16.1527	5.98658	57.1531	15.1457	39.109	47.8196
	29.1565	35.1488	38.8522	5.0614	47.7519	24.227	43.4713	26.5378
	36.8049	29.6137	10.0744	5.11823	65.6822	15.2116	42.0198	47.8378
	62.8591	21.5603	6.86477	3.41328	45.1102	19.4425	36.6151	46.5021
	58.4983	23.4075	18.6411	4.5259	81.7768	20.8559	39.0526	30.1381
	65.0721	17.6578	13.3455	5.20632	44.6101	24.9178	67.5462	31.5354
	33.0908	19.4828	12.3904	3.3048	36.4548	28.4165	32.4924	38.211
	33.5647	22.8148	9.26701	5.7132	40.246	16.1303	57.519	38.3912
	53.29	16.2145	13.3179	6.32497	52.6404	29.9467	34.8921	64.0028
	102.141	20.8125	11.8116	6.13033	46.6117	22.4671	40.8373	51.7218
	68.9706	20.4775	13.7713	4.20669	37.0847	18.8917	45.1419	97.3703
	40.0775	22.488	18.0467	4.39028	52.3193	16.6557	49.452	58.6533
	68.7033	19.494	12.3405	4.93477	36.4867	16.1095	43.4812	25.8899
	50.9067	28.5722	14.9971	3.59016	40.928	20.5143	47.3458	48.4163
	61.4438	18.1056	11.6681	3.23298	39.901	23.6911	47.1086	128.243
	71.3182	19.687	10.2049	4.36201	43.945	16.5857	48.668	37.4718
	82.9858	32.286	11.1957	8.15408	33.857	18.5406	52.0531	46.6721
	39.5957	22.2198	11.2429	4.70165	47.8221	15.681	71.972	30.6353
	62.433	26.2127	13.0068	5.52769	45.9188	15.4588	33.0961	42.9891
	39.2555	31.6834	7.42314	3.97538	55.674	12.0825	44.4466	45.1785
	55.9692	16.0906	11.4755	3.47822	47.0657	23.7026	37.532	51.4392
	87.1026	13.9063	12.2728	5.58021	41.9658	23.9313	39.5424	29.8675
	58.1677	15.5387	23.8351	3.98135	42.4838	20.9688	66.3873	60.299
	44.4039	24.5383	9.08736	5.63647	48.4762	21.2461	85.0294	30.594
	44.7166	45.1077	11.226	6.10755	47.4643	21.6113	50.4877	42.6635
	28.8281	27.9992	9.42642	3.32852	37.4508	30.5466	20.1005	52.9097
	80.4331	16.8797	11.1789	3.94914	39.3398	19.9103	56.6331	44.5179
	58.7209	20.7919	17.5535	3.95322	38.0854	33.7653	62.3437	51.6499
	47.3373	25.8362	17.0629	3.29755	43.3473	34.6182	74.2214	26.8286
	44.3778	18.6416	12.2474	3.28577	37.3273	29.1154	37.1372	118.044
	48.2064	15.5311	16.816	2.63199	37.1193	22.2658	45.5608	60.179
	49.1794	37.104	13.8229	6.10503	48.0577	40.0232	57.9782	67.7592
	38.7582	18.664	9.92697	5.60447	42.3218	24.61	39.7231	69.0962
	55.6852	20.8173	12.5141	5.06061	39.9174	21.0429	38.9721	29.8999
	36.6394	19.3301	13.4455	4.51655	55.7479	96.9994	41.4938	31.8247
	73.4075	23.9783	12.1352	3.40245	53.3998	42.5891	39.9912	34.4707
	52.152	18.2595	12.4508	4.48083	53.4621	27.0045	58.8829	98.0134
	59.8542	42.2143	10.9712	8.78784	42.525	20.8979	43.9336	57.162
	38.3502	25.3394	12.6421	2.99406	44.0796	30.5108	42.836	34.2686
	89.8199	16.7748	10.131	3.9989	43.743	15.7809	61.578	39.5764
	84.5395	22.2827	14.5359	6.23349	51.0364	26.4414	69.9521	125.454
	43.309	18.8692	18.0301	3.9672	55.7027	17.9207	50.6216	36.6061
	38.3802	21.4371	10.6231	3.45267	41.1825	26.9777	42.1278	43.7276
	43.1627	30.4899	12.6968	4.05599	38.265	20.2757	41.8562	93.0877
	82.8799	21.3722	10.462	3.70944	26.1135	22.4245	57.8899	29.5462
	1435.56	18.0423	13.4177	6.2382	44.5755	25.5855	56.2343	32.7691
	47.047	22.7302	12.4009	4.03446	55.9476	18.5142	40.1927	93.9112
	69.4338	20.9654	10.2266	4.08805	61.844	24.4059	32.4841	44.0175
	205.807	28.956	11.377	3.88286	45.4557	21.9813	37.4352	53.0956
	95.5603	20.4042	22.5644	4.18814	68.6956	17.0885	55.4369	49.9679
	62.9485	58.5832	11.022	5.17062	48.6972	15.6059	59.4489	45.83
	90.0496	20.9462	29.1717	6.1524	42.7889	20.3484	71.5866	104.181
	116.714	14.0655	12.9326	7.59965	42.4196	21.762	51.3763	307.847
	45.6594	21.4225	10.3759	5.249	44.4073	36.8581	38.5543	29.5759
	50.9502	16.7541	11.5169	3.04833	55.9938	41.4274	40.3218	55.9964
	89.1886	23.7615	12.2357	5.16872	44.6091	39.9571	63.316	39.3155
	35.7696	18.4866	13.6995	10.4642	34.5578	9.35204	35.9644	29.9442
	68.0275	23.8142	16.8877	3.89465	38.9179	31.3122	43.7494	30.8457
	87.485	17.2897	11.4977	3.14963	38.2691	17.2825	36.6949	33.4256
	50.6721	14.9896	11.6377	4.05039	37.7605	37.3347	36.1574	22.8996
	83.3465	115.213	11.3257	3.76716	40.9386	20.3477	59.5256	40.4818
	41.7389	20.9432	13.4277	2.59307	75.4604	36.0155	44.272	33.2757
	44.9442	18.8796	12.4458	3.59494	34.9475	19.7121	55.6391	54.5498
	75.4938	17.1689	11.2713	4.09294	38.0839	21.4159	42.4838	36.8544
	41.3341	25.687	13.557	3.87798	41.376	26.4737	51.014	91.2078
	59.4065	25.0527	14.421	2.5454	42.1243	21.4194	35.0657	35.6466
	47.1972	21.6216	10.5306	4.19001	37.9166	10.3054	41.8645	24.0749
	44.9491	21.4392	15.2184	3.72703	40.2395	17.8661	68.3383	31.035
	40.9551	27.4018	16.3671	4.40385	73.6501	32.4123	37.451	481.198
	48.1092	20.7347	13.7729	6.87489	46.8506	20.7151	63.1723	39.0017
	66.0838	19.4104	16.0204	2.7611	33.3721	21.3272	51.1285	29.6149
	84.7955	18.9211	8.31011	3.51621	45.9049	38.8028	30.9088	42.6426
	46.2611	28.5425	14.6281	5.69933	51.1292	18.4557	37.49	28.4513
	33.6074	26.3175	12.1279	3.96612	46.0114	29.5783	48.3368	38.5055
	42.1344	15.9569	13.0885	3.92984	127.442	15.7088	43.7153	51.6759
	29.916	22.3362	10.0253	3.21321	49.8611	23.8926	51.7933	28.4263
	77.2983	27.7641	11.5555	3.39418	62.9164	17.5089	39.4364	28.1661
	47.1162	38.4259	14.4163	5.1761	40.3391	105.812	39.2105	51.9889
	162.814	20.5454	12.77	3.81709	43.9754	22.5706	48.2799	51.3511
	62.7252	17.8875	11.9704	5.98047	43.5486	32.5403	46.0888	30.2571
	37.9896	48.6452	10.1148	2.59524	57.4372	15.5195	60.5893	59.578
	48.3979	41.2082	10.7221	3.32455	73.3105	20.8824	48.1975	35.4477
	102.217	17.0265	11.5018	3.28314	58.3325	17.7742	46.3958	45.2496
	43.4649	29.1654	8.653	5.43343	35.794	19.1277	56.9929	41.2646
	47.5066	24.6857	10.3997	3.70948	75.0077	22.5946	39.4499	39.7758
	50.6135	17.3656	29.9271	3.53961	50.3106	15.4357	37.713	48.4611
	33.6289	21.8154	18.2673	4.47965	52.1858	23.9591	217.456	100.83
	62.7676	20.1972	11.8996	3.3808	51.2624	43.8764	78.9752	51.287
	49.7986	24.1187	12.3814	4.50715	36.569	66.741	80.4645	40.0032
	57.7564	17.3926	10.6957	7.31513	39.9564	18.4497	52.1009	43.3493
	104.65	15.5751	11.4779	3.07001	41.3272	23.8845	80.8116	77.1177
	40.7802	23.3266	12.2699	4.83921	45.0891	19.1217	37.5494	37.9388
	32.422	18.3097	9.81993	4.48983	35.6306	23.4687	43.2784	32.9992
	92.8046	18.8176	10.7809	3.67328	43.6531	23.5995	32.9243	73.1968
	40.9197	14.8041	8.26065	18.6555	41.0456	22.4736	67.7156	49.4742
	83.2211	32.1633	11.898	4.71807	47.0082	27.4518	37.796	54.7607
	36.1437	30.1279	14.6322	3.09386	47.4319	25.9579	61.7113	46.8532
	100.979	25.5779	11.7017	3.68994	99.1947	27.3642	39.7893	145.114
	53.7584	24.4313	15.7424	2.99193	52.9886	36.9093	39.7645	37.961
	132.985	14.2712	10.5351	5.01648	39.7687	20.9056	36.8481	47.6263
	84.5988	29.111	14.351	6.37674	44.721	20.0316	41.6716	52.0207
	62.3504	14.7925	13.788	3.71031	54.5653	18.8101	52.7985	48.1319
	97.167	18.1702	11.0186	3.92756	53.9338	26.7578	42.0109	59.2194
	54.8645	22.0485	14.2984	5.46307	44.6278	19.8113	39.7932	58.9549
	57.8617	15.6592	15.1529	3.35499	44.5781	29.6871	34.7316	113.257
	57.357	15.8745	11.8661	4.8945	43.7507	18.7347	38.7946	62.4401
	43.5419	15.8116	11.9551	4.27941	45.5398	39.6774	79.5136	43.9528
	91.4191	34.1821	14.8421	7.32539	48.5169	26.1923	47.4799	49.0376
	50.0645	16.3003	18.6002	3.43787	49.0164	28.6835	92.5249	23.3297
	151.548	79.8801	20.0277	3.76371	45.9359	21.188	37.1635	77.9289
	55.3188	14.3602	11.8284	5.45484	42.7343	17.7652	41.5668	61.9579
	51.699	25.6019	17.2908	4.53507	47.5679	22.1694	42.8585	39.5502
	64.8169	39.2612	13.7879	5.07239	40.8484	36.5623	47.7283	44.3385
	50.6426	18.3241	16.7778	5.64385	47.6075	24.1303	38.5095	24.2787
	25.7688	25.486	11.6245	4.06157	49.4376	24.0141	35.3366	31.1368
	60.5607	16.6329	12.0592	4.30171	36.9091	28.2872	33.346	37.7035
	50.0181	33.9308	10.6233	3.46925	42.5631	23.9117	80.3003	68.5579
	40.7362	16.5073	14.016	4.16561	45.8445	22.4668	26.2445	39.7584
	80.2258	16.2687	13.1053	5.51954	51.5989	23.7666	38.8477	46.0928
	51.3027	15.9437	14.0042	6.06325	38.5322	19.3235	25.9139	46.2965
	51.4223	14.3021	9.73575	5.62887	39.0893	20.8902	46.7277	49.3991
	90.9276	19.4603	12.2892	4.91358	35.8397	19.0946	34.1696	51.3124
	49.4246	16.757	9.81236	2.21913	36.544	23.8088	33.9919	43.2541
	38.1055	17.514	17.8131	3.09033	43.2104	18.623	68.6338	69.6781
	32.8177	18.3803	11.3387	4.53017	43.341	63.549	50.9522	48.817
	61.6218	17.5336	17.1439	6.21775	48.7079	16.6204	28.9951	44.2577
	55.27	16.5365	10.7546	3.96056	72.6835	16.3625	26.5957	58.91
	60.8508	16.5053	14.7933	4.40156	43.9882	21.1068	26.3016	87.967
	49.164	16.2859	15.08	3.5631	37.4264	18.5609	35.2677	53.7557
	77.3688	20.801	10.2327	3.71683	80.0484	21.4087	34.7156	27.122
	48.2516	19.9151	13.0072	4.01305	38.59	22.3111	35.2544	32.6898
	124.158	15.8693	13.1623	3.74689	44.3909	17.4521	33.4336	99.5866
	50.0923	17.8709	13.5221	4.22012	38.2272	17.8688	31.4692	33.8666
	61.9568	15.7673	13.7552	4.52722	36.3716	21.5519	29.9898	63.0311
	27.4896	25.4966	9.42842	8.39371	43.0497	56.8998	36.4455	55.4121
	48.085	30.6145	13.9511	5.49952	47.4277	36.2616	29.9951	41.2868
	30.3257	15.9715	12.976	5.42631	51.7434	19.2348	623.617	24.4983
	45.0304	21.0149	11.2942	5.52508	34.8902	26.8877	29.6699	41.8786
	43.7443	19.6861	13.9162	4.28652	75.1907	22.1136	33.7918	41.7477
	120.522	14.3851	9.11837	4.35539	48.1095	36.2519	34.9472	56.838
	49.4698	23.4807	15.3088	4.71289	39.2758	19.3218	55.0771	68.8798
	134.948	17.8306	13.5912	3.85068	40.0521	20.4592	39.5394	32.5071
	60.4882	24.6457	14.3008	4.03535	50.7747	21.96	26.2221	57.703
	137.085	19.2143	33.1787	4.57672	46.8932	23.9568	30.9764	108.96
	45.862	31.1714	24.0792	7.85927	57.7382	11.8388	55.7078	46.3486
	74.8356	20.2054	9.55692	5.42492	37.1834	21.045	37.1203	37.5094
	42.3829	23.3907	9.14233	5.91479	39.0721	10.7616	30.3055	37.519
	115.483	27.2828	13.1657	11.9395	42.4637	61.9574	47.4161	43.2413
	44.959	17.9968	24.9328	3.80666	56.079	26.7135	38.3895	44.7146
	51.4807	25.9366	12.6419	4.15575	41.8281	21.7672	64.4679	39.6711
	20.1589	20.154	17.51	2.90926	39.5618	20.8607	36.3663	41.4203
	43.5022	16.2165	9.40561	3.86429	41.0405	15.3837	56.847	39.2095
	51.144	21.5123	10.2995	5.31208	38.5418	32.162	32.4176	46.8161
	70.8542	17.9315	58.8836	5.22375	45.1854	18.53	61.3374	32.4741
	43.6939	21.3308	14.4303	4.58747	39.7086	24.8368	37.5566	287.061
	56.026	14.5868	13.7718	4.79733	59.6937	14.9418	35.0534	26.8986
	41.5763	26.9874	11.7643	4.02893	97.1786	31.9318	35.2417	21.0614
	49.1999	37.5385	33.6147	4.33395	44.1895	21.0739	37.8007	34.5926
	101.844	19.6155	14.8487	3.28976	44.1234	22.7313	31.0297	72.4526
	61.4063	12.5479	20.1049	7.33218	52.3978	25.5839	34.648	59.3481
	66.1627	27.8313	13.1083	3.85841	51.2519	23.2605	37.404	57.185
	65.5833	29.2065	14.5812	5.92995	36.5966	17.7202	44.6682	44.0746
	34.5931	22.4464	15.6279	7.17511	29.1082	27.9787	106.766	41.3338
	44.5087	22.3913	15.237	3.97932	50.1856	17.0761	54.0255	29.2162
	62.5498	18.3716	8.90902	4.05359	342.266	13.903	44.3375	41.5148
	55.8976	13.1987	12.7985	4.07675	49.4446	20.6447	45.9151	33.5629
	61.1503	20.4286	10.6066	10.4164	41.8092	31.1971	72.0486	43.1661
	80.5747	13.0063	13.3652	4.46593	41.9379	31.8891	125.707	28.0786
	33.8732	20.5156	12.3932	6.71005	39.2074	22.5186	62.1115	30.9679
	54.51	21.4679	11.9854	4.88165	48.0538	26.1113	29.0157	55.4826
	65.9051	16.8313	16.0065	4.26196	63.1425	19.014	40.7595	46.071
	40.3839	17.926	16.4328	5.85134	48.6558	12.5588	57.3991	32.3096
	29.5112	24.8886	9.24349	4.58431	47.3929	14.8721	185.715	68.9747
	99.273	16.3813	15.4398	5.17069	158.386	19.1676	40.7641	96.4774
	64.5239	15.1223	10.2622	5.7907	37.2544	13.4583	47.0069	53.8839
	31.1498	32.8542	17.507	4.07599	49.4137	20.5291	32.0073	47.7298
	35.2025	20.4025	18.7084	8.97609	55.4554	17.7768	30.3579	77.4512
	189.946	18.4056	11.1594	4.58696	49.1096	21.964	31.089	34.8318
	59.4018	22.1831	18.653	4.99085	47.4672	31.8821	43.4038	61.1133
	53.507	21.2501	11.551	4.47532	344.07	24.3988	27.3719	36.6106
	56.5186	33.2988	13.6609	3.31467	47.4648	33.9799	44.18	111.988
	118.208	23.6189	8.71608	4.4772	51.5117	26.4772	31.179	29.299
	90.5985	31.0186	15.4282	3.57445	57.6376	16.9198	31.7142	30.0129
	29.7402	17.0502	29.5133	5.37172	42.6322	22.9089	47.3205	30.3316
	27.0594	15.94	12.0531	2.43566	42.7861	10.787	31.5731	45.7477
	76.9119	18.8364	25.002	3.89178	86.0842	25.0745	37.4602	73.5337
	285.401	21.326	11.9277	4.51354	47.2878	23.3559	63.1207	60.0112
	146.267	20.5692	13.749	3.23352	63.3968	17.0525	67.5611	47.8455
	151.08	20.2977	11.5937	4.21796	47.038	16.1658	138.526	58.4537
	31.7472	19.6011	13.9511	4.02699	44.0542	16.2773	52.7561	23.3119
	90.7553	20.1525	12.8587	6.17371	85.7015	17.4051	33.2966	33.0926
	42.6932	24.8103	8.12786	6.89905	45.5938	31.4433	57.9763	35.4959
	50.7826	18.3124	12.8896	3.53814	46.3364	26.6287	55.8277	92.3862
	49.9437	19.5382	10.5867	4.2927	42.2714	24.9227	43.4278	50.0771
	34.4986	24.1819	17.0718	5.26243	45.4064	21.4651	26.0989	26.1295
	35.1423	18.7188	10.9232	5.78918	67.3891	21.3958	46.6694	32.1012
	57.4603	24.0919	14.346	4.1424	45.5804	25.8678	35.9049	45.6286
	60.2012	18.4753	13.7569	3.8703	80.4324	14.9846	45.4485	48.8511
	40.8817	31.2562	12.5884	4.40254	39.7591	26.6033	71.8521	38.6566
	89.4512	21.6333	11.7172	4.19599	52.7954	13.4104	46.5224	54.5145
	37.0257	17.6866	16.536	6.66585	43.9075	12.2255	30.2103	30.3972
	68.1656	31.9652	11.8609	4.55927	47.969	17.7914	39.0495	42.4226
	37.9257	20.4445	32.9183	5.22187	54.3975	24.9749	47.3047	40.5541
	92.907	24.5285	14.2474	3.45451	45.6551	14.7717	36.603	89.8159
	68.2902	20.2275	11.552	4.25104	45.8605	12.7261	52.1208	57.7101
	161.248	44.1222	10.5452	3.63535	49.4998	17.7552	26.575	31.2364
	84.3655	20.6161	13.9922	3.88623	52.2661	18.9162	54.1965	27.2288
	156.186	18.3514	13.7621	5.39576	57.3893	21.4937	35.5797	26.8601
	45.679	19.0138	15.2002	5.13449	53.9508	22.2683	49.5619	36.1055
	52.2077	18.2154	11.0801	3.9789	38.7017	25.4243	31.1341	36.2368
	44.185	31.419	9.78001	3.05156	49.9049	13.7275	34.371	35.9628
	43.4126	20.9416	17.836	8.49853	44.4059	33.5799	31.184	34.4312
	45.9158	27.401	12.6173	4.44722	42.6486	20.1438	33.4327	37.3466
	60.534	17.5633	16.8198	4.29391	36.9978	14.1652	48.1473	36.4651
	74.0735	23.5146	7.51588	3.00791	61.9637	13.0541	45.7577	39.815
	255.762	17.3281	54.0894	3.89911	36.3413	23.4541	30.066	37.9734
	48.466	18.5205	20.2275	4.33058	42.991	30.0283	35.2478	26.0829
	52.6083	56.1768	12.9065	4.56567	42.2681	19.1686	30.552	34.1351
	70.4358	16.7756	17.1304	4.74449	42.2449	16.7588	43.211	49.3766
	48.333	20.5528	12.286	4.95481	39.3837	12.5419	33.0737	62.3057
	108.09	20.3191	14.5555	3.76396	104.782	90.0222	29.623	44.7843
	54.9653	28.6781	10.5878	4.07068	49.1887	17.1452	37.932	46.7878
	56.9056	13.4624	18.7056	4.28881	42.9805	19.846	90.4922	56.2995
	56.094	30.8324	12.2488	7.25971	44.2629	19.274	24.2414	38.0688
	43.0271	27.7954	9.9355	8.41477	41.3139	22.6713	47.447	40.3977
	55.9104	14.7242	13.7597	3.13114	57.7641	27.3055	34.9146	42.8132
	49.0848	189.09	11.3476	6.44573	47.265	191.88	43.9397	27.2257
	61.6248	20.5937	9.72544	3.58029	101.352	18.9648	35.9321	34.3105
	49.6297	22.3205	17.7987	4.57965	49.2065	23.2696	33.7709	45.6796
	178.373	66.1343	16.1443	1.74325	37.7811	17.5967	28.8832	37.7304
	81.6709	23.2171	13.9413	4.51612	45.5356	15.1749	55.5441	29.6856
	103.733	32.9446	8.99027	3.12859	57.384	17.9402	29.1107	41.1982
	44.2553	20.5036	14.9028	5.91808	44.8062	20.7487	35.1466	32.7008
	44.553	18.0825	13.2151	4.8991	39.3828	18.7466	34.0116	25.3987
	48.8005	21.1677	13.4101	4.22074	43.6597	21.0426	33.2029	58.1501
	105.791	16.1928	15.2053	5.08809	120.294	19.4508	33.6959	57.4309
	37.383	17.0095	19.6208	7.15309	42.7815	19.3641	38.3421	25.4443
	81.0608	21.4691	11.1644	4.19333	73.2045	22.1258	48.7471	40.6713
	86.8316	17.3356	18.0466	4.13429	51.5616	18.5816	32.4854	24.7965
	40.6414	48.2324	11.3268	8.63554	55.7846	17.0982	49.6851	55.4283
	40.2073	22.4773	10.2868	3.40224	59.9765	68.4095	31.2694	43.1951
	34.659	18.5015	19.1071	3.48996	38.0371	16.2589	31.9396	35.3054
	51.2982	23.1849	13.9088	6.8811	42.6611	16.0557	37.4044	78.5804
	65.1073	51.3311	12.6657	3.86366	41.9727	18.6476	45.707	33.8493
	56.0701	11.7868	13.9879	3.7558	50.0788	15.8418	43.1812	37.0482
	37.3654	29.2815	11.8942	4.59011	43.9259	15.2762	34.7336	25.5807
	39.3485	30.8338	12.073	3.27935	75.4211	16.9806	53.3306	36.9261
	62.0476	21.0589	20.3087	2.93038	50.3482	23.6645	39.8679	66.0517
	51.0311	15.156	14.2698	16.1725	80.1567	19.3911	41.7321	75.848
	40.0311	24.2765	14.882	4.47492	54.1754	17.1229	28.2763	77.4662
	77.8002	14.3681	12.8497	6.43872	47.5629	22.0664	35.3746	99.7452
	63.9902	117.548	8.88492	5.09839	48.776	17.0821	46.2152	24.1391
	55.4542	17.1231	10.1849	4.20808	68.9742	28.303	32.48	100.375
	42.447	16.8107	21.3355	3.90743	116.884	15.871	47.3343	43.792
	39.5813	11.7417	12.7293	2.91691	44.9169	14.5034	26.9734	43.725
	33.4824	17.656	14.4296	2.71532	45.2817	12.4935	28.7443	32.9454
	43.1651	16.9893	12	3.90121	47.2169	31.7881	33.6042	85.9776
	75.288	17.5455	10.0455	2.87775	49.3566	24.138	56.303	29.0615
	69.2049	24.2273	42.8266	8.24984	43.69	20.7256	40.4589	34.9642
	66.5989	18.4114	9.82569	3.40222	40.4494	24.3619	63.9964	39.2448
	104.449	20.6259	11.9318	2.5816	60.115	23.0597	37.3973	46.6026
	55.4069	23.943	19.712	4.97528	46.5318	16.9572	39.0193	27.1764
	66.8432	21.6488	13.4895	3.71487	52.1955	17.1178	28.5806	37.1597
	195.682	14.0821	16.3888	4.76302	39.6297	19.9434	34.6279	31.3316
	140.444	20.8338	16.5691	2.72953	94.2218	12.9409	37.0199	37.4626
	194.915	20.5531	10.0785	2.89912	66.4718	18.4891	34.0652	50.4631
	43.8267	37.8781	13.6584	4.25894	56.884	19.0985	31.9542	62.8321
	471.747	20.6936	14.4181	3.67787	42.8854	13.0138	46.4789	40.2089
	61.874	25.0472	10.223	2.88602	59.0796	23.4141	116.043	33.706
	36.4887	38.6828	11.6459	3.68439	50.2532	25.9424	47.6137	33.4408
	44.2369	145.98	10.5262	3.33629	47.4152	23.0465	28.5782	46.8913
	69.5709	18.353	12.3073	2.10859	100.68	13.7012	30.7142	49.955
	97.8487	18.9237	17.7274	4.57481	82.0262	17.4945	26.1603	57.3376
	35.2363	38.2544	11.7423	6.07116	44.7817	31.5011	36.5556	26.2626
	42.2914	29.3857	13.5577	4.11048	63.3655	21.6018	36.3746	35.7069
	64.2418	41.7237	19.1503	2.95744	45.4706	24.7924	29.4703	35.677
	149.782	15.4155	12.7009	3.72639	58.7504	16.1664	30.8104	60.0207
	183.189	20.5607	12.1832	4.07288	51.3089	22.0379	45.4663	44.2175
	44.8634	25.0332	16.1661	4.35619	47.5435	17.9839	27.3826	87.2954
	64.8887	27.064	12.4829	6.05534	42.0138	28.0826	38.3498	61.4753
	71.1952	22.6108	15.8931	2.83815	39.7417	18.0823	35.5769	26.2615
	91.9044	25.8209	11.7535	4.27443	45.2006	35.0375	36.07	71.8276
	54.6396	23.4907	7.28771	5.20324	82.9329	23.1218	32.3241	89.7246
	65.4557	16.2365	10.6027	4.63748	42.9317	16.1767	23.7755	31.5643
	62.9547	26.4866	11.1595	4.38198	45.1728	16.3035	27.8294	34.8796
	42.9639	21.3053	14.0007	3.5281	76.2114	24.5246	42.4424	39.8388
	47.2841	39.195	12.1156	5.71487	41.8912	16.423	27.6524	22.3149
	49.8463	19.2049	10.7722	2.80857	79.4221	17.436	30.809	61.4146
	47.6269	15.765	13.3869	4.95353	50.3089	17.9175	25.5378	40.0191
	44.0898	17.1939	8.29443	5.08648	45.4616	13.9118	41.1409	26.6896
	48.3106	21.8747	8.75077	4.56511	38.0535	23.3471	32.09	28.2629
	53.5118	23.5269	8.06663	5.05163	46.4535	17.3897	43.5383	20.0471
	78.9474	19.4779	10.2787	11.3322	42.0921	22.8447	31.7687	22.5986
	114.583	21.7596	10.6087	5.57174	43.5538	20.7269	39.5505	31.2684
	46.8072	23.0462	10.9393	3.98446	68.8273	21.0974	21.2524	68.0312
	52.6277	22.0973	10.3294	4.21281	46.2995	55.0112	36.0439	26.9428
	53.9893	24.5818	12.1043	4.93397	61.3666	22.4641	32.7701	40.6148
	89.2394	27.7519	9.6501	7.4898	53.2787	20.3366	27.8805	35.9751
	40.9286	27.646	10.6477	4.31532	46.6986	19.5348	24.9412	52.8654
	45.9342	22.8335	18.2637	5.97773	45.992	26.6602	40.6058	26.7282
	39.2011	22.2505	8.96981	6.15427	51.4416	18.5905	24.9815	43.0668
	30.0808	36.4785	7.0356	2.47478	39.0974	25.5023	40.2452	107.92
	29.229	22.9501	15.8684	7.67153	50.5772	18.3367	53.2693	34.7865
	35.6292	22.5546	9.52504	5.28525	64.2098	25.7519	49.4294	39.4063
	37.8581	24.7186	11.787	8.80818	34.9615	37.5454	37.1772	40.5402
	38.0717	15.3572	10.5105	5.96169	55.7959	17.8663	25.9776	26.887
	58.7892	14.4195	18.7822	3.91931	46.9101	20.8493	34.3778	44.7986
	39.4024	25.9071	9.26413	5.10382	43.5867	23.9979	36.5353	35.9694
	55.8411	29.2186	29.6846	2.67062	52.1049	11.9074	42.2893	58.6534
	43.4459	16.5296	8.75845	4.41681	49.4806	21.8595	49.3853	56.8798
	53.9127	19.966	12.7687	3.91718	39.6495	23.9276	21.2443	33.9826
	76.9976	15.3836	11.2185	4.87801	47.0204	22.1574	33.4137	51.3522
	265.07	67.3035	13.5181	4.44172	42.3074	27.5312	40.5455	42.6656
	37.1263	21.2715	11.5978	5.32538	48.8534	25.4221	29.1279	52.1722
	40.9227	18.3048	15.4852	4.7539	45.2706	17.0508	56.376	29.7452
	30.5117	17.0677	11.9238	3.2572	48.0997	20.1609	29.1909	38.6139
	59.4175	17.1741	27.7683	3.0167	43.3279	18.2153	34.565	74.229
	37.4732	29.9048	10.7519	3.13997	38.0602	34.1828	46.4259	39.8593
	75.9221	18.9822	13.2036	3.25895	37.3584	18.9946	45.565	23.4724
	124.197	78.0933	10.534	4.07026	64.4676	16.3972	43.5936	34.1936
	33.9584	18.8226	11.147	4.90519	71.502	29.8129	101.286	35.4341
	75.0904	113.149	13.2399	3.77063	52.6218	24.818	34.1887	32.1084
	42.0175	17.4392	13.1095	7.19829	36.24	21.4641	107.985	59.2329
	131.225	17.868	14.5205	4.84011	54.9452	17.2568	49.3291	140.683
	87.4654	16.7373	26.4178	4.20733	54.8807	19.6807	35.6621	37.3252
	57.8566	20.2691	11.3731	3.95891	34.3646	19.0784	28.1702	37.0383
	26.5115	22.0895	92.3431	5.20419	33.7263	23.5501	69.4103	30.5786
	70.9487	21.9445	15.0621	3.35657	53.5217	21.6992	60.2768	43.956
	124.211	19.6147	10.6334	3.56441	32.0289	86.9247	34.8304	64.3482
	70.2843	29.2925	14.62	4.79708	64.9604	16.6245	32.7814	45.9488
	70.7771	16.6834	12.5056	7.69685	56.1156	11.1734	26.0379	46.1668
	47.8962	19.2387	12.7003	3.17647	49.4765	26.4479	26.9948	78.8631
	52.7858	22.8616	11.5755	4.6263	59.7914	16.6238	32.3425	45.0761
	46.4484	20.742	11.9531	3.53371	50.3164	19.9104	28.8802	25.8976
	53.6728	21.3963	12.8503	5.89652	39.8417	16.5441	40.2945	34.4021
	67.6927	17.5494	10.6257	4.49518	42.531	23.0984	36.4581	48.0833
	75.3223	15.5446	12.3495	3.24443	46.3208	20.1292	36.3728	25.3177
	48.9897	20.5805	25.1289	2.84872	41.4907	22.5498	54.0054	22.273
	55.7364	20.2461	12.0717	3.97444	37.1378	19.2617	56.3289	25.3547
	61.6539	26.0671	14.1329	4.08232	52.4805	21.3584	25.7917	28.2701
	111.196	27.1264	11.4512	6.58693	47.7186	24.7702	33.3525	22.5318
	124.81	20.5021	9.71353	5.22032	55.6459	25.0197	38.2171	60.392
	30.97	28.3175	11.6304	4.2516	57.0238	52.759	32.6572	92.5699
	67.4911	20.6623	15.7061	1.75474	48.3047	19.5965	28.5985	38.2437
	64.3202	29.633	8.42162	3.16282	49.3433	17.2694	41.1046	41.5189
	52.7389	29.4988	13.8452	3.1485	93.5353	31.043	31.7173	71.7995
	55.9486	22.4051	17.0162	4.10713	47.7198	13.9022	69.7646	35.4238
	55.7502	22.1145	8.18359	6.24482	47.2577	21.7196	39.8882	23.7633
	78.4005	35.5569	7.02892	4.8836	44.1305	21.0541	25.8028	25.9674
	85.3881	24.1097	14.5266	3.24958	53.3095	20.293	21.4957	41.1779
	56.545	24.632	10.9739	4.35968	46.7781	31.0845	38.2779	48.1981
	43.6015	16.1741	9.04296	2.88662	78.8286	11.5849	27.5104	27.7242
	43.8649	40.8668	12.3366	5.5703	50.0761	51.763	33.5356	148.132
	71.7731	17.133	10.1729	7.64624	42.8791	31.2806	45.3893	28.1232
	56.869	18.1117	7.40712	2.61539	43.3921	22.4236	51.2943	44.112
	70.0469	20.138	9.79241	2.62762	53.6186	20.4001	43.7536	41.4373
	71.1109	20.0198	11.0111	3.63754	50.2355	20.6791	22.0515	58.478
	79.598	17.8089	10.2503	5.03186	47.4265	22.9516	23.2468	28.9168
	40.5575	24.9167	16.3058	5.9881	60.671	20.0632	37.3066	43.5708
	33.2866	22.2769	14.4628	3.74066	50.7171	18.1192	59.5542	43.0091
	38.4657	33.2251	14.1372	3.76161	50.9688	21.0266	35.0048	44.1225
	56.1043	18.0711	8.7002	3.30958	38.6628	44.0122	29.9803	24.8745
	216.057	13.1092	13.4765	2.86336	43.9857	44.149	35.7602	69.7394
	50.0634	27.8543	15.1331	5.87587	37.2213	20.954	58.4382	43.9249
	47.599	22.0865	11.9435	3.62621	47.321	15.9395	56.4117	34.2881
	40.4129	25.9301	8.08429	4.56008	78.7621	12.2917	25.7952	22.659
	53.8896	25.5325	16.0582	7.58197	39.9461	18.9336	38.1005	37.8959
	45.1317	19.3054	10.8928	5.81184	40.9868	24.7429	32.5984	44.7208
	37.9933	16.3465	14.571	2.87363	57.1629	22.4983	37.6265	45.6456
	26.866	71.9034	11.4151	4.79858	48.6357	64.7517	31.3196	39.705
	35.803	19.8075	9.67774	4.55244	75.6491	45.5419	30.7558	39.5465
	37.1931	17.272	13.0534	5.2717	61.9271	33.8775	25.8705	32.7817
	41.7028	31.4934	11.6577	3.06539	39.7489	16.22	32.9065	32.2072
	33.6083	18.6309	9.40872	5.2482	46.081	26.4277	43.1911	47.1516
	59.2072	31.8287	8.02766	4.39293	47.3881	17.0154	34.3415	41.5516
	56.1541	37.4986	13.8508	4.62109	45.3724	39.1586	77.3727	37.59
	49.4627	42.6221	13.4373	3.74674	48.7755	19.5292	45.5177	29.561
	28.5614	26.8821	11.0977	5.32139	43.1606	16.0183	31.641	135.013
	38.7667	26.8243	14.8224	3.55691	38.0584	25.0722	34.9533	28.1768
	145.159	23.6328	10.7874	3.99688	56.7384	21.6711	33.5562	30.8267
	40.8206	19.678	12.1337	3.90764	52.0682	24.8872	36.1665	36.6085
	47.4648	26.1301	10.446	4.18588	41.2733	24.0791	31.7528	43.3088
	49.8823	20.0009	10.7933	7.24335	41.7754	19.6724	27.7539	54.2932
	57.9642	43.8258	11.3599	3.5122	49.7171	19.2508	118.406	85.8611
	65.2	28.0139	13.7026	4.89432	45.4693	19.2215	40.1805	33.4433
	53.4828	25.9492	15.922	2.46473	47.2392	47.1489	37.7524	51.1715
	97.8401	226.141	12.2227	4.09979	36.1251	28.8622	36.3397	69.2679
	52.9926	32.2875	11.2839	4.68847	52.9945	25.1122	61.8654	39.8241
	110.968	21.4069	12.2303	3.37391	38.5218	20.7803	33.9687	43.5147
	46.3961	132.232	10.1714	4.49786	68.7203	25.2386	28.2497	35.0558
	418.03	24.4675	13.5558	3.39826	72.1085	19.4862	26.1381	49.9238
	55.0186	18.3567	11.5976	4.87084	68.3383	20.4979	31.6772	49.9407
	63.0221	21.5885	8.5723	4.40748	56.6566	17.8316	86.8967	46.821
	63.4601	21.8336	14.7299	4.92346	53.007	16.5027	29.5886	43.0683
	57.3673	18.3464	14.7057	3.57151	104.043	20.8435	19.2212	39.4883
	42.5189	37.4601	32.7748	3.93584	40.0548	21.6127	52.3135	35.3959
	34.3547	37.6425	21.8129	4.2563	85.9164	14.9285	32.8774	88.7678
	35.789	20.4228	16.0747	4.27605	45.0347	26.4875	31.0343	35.2475
	43.3209	35.0016	15.7286	3.20973	52.5866	16.2688	49.0574	35.5693
	52.627	16.9835	10.2682	2.67018	60.6942	13.4284	29.0513	28.0379
	36.4123	28.9194	14.6867	3.79693	34.2302	18.3098	23.6538	37.0128
	91.8413	24.0125	9.72161	5.92633	51.9949	18.6351	32.625	34.7113
	91.2067	26.1169	12.086	3.84406	53.4897	15.1719	40.6	31.8939
	123.917	110.339	9.3994	2.80398	67.2006	29.0767	24.3895	56.2855
	80.2491	66.2134	11.4036	5.27663	48.8362	14.8801	51.4295	40.41
	62.7256	216.771	15.2068	3.67816	78.0565	17.8597	42.1358	31.8679
	51.8958	115.764	11.9802	9.16188	38.0683	21.7915	28.4829	27.5186
	45.8605	42.8538	12.4225	3.63417	41.4343	19.3236	51.2294	32.4834
	137.31	23.6836	9.3447	4.82369	51.0269	16.5992	33.7165	114.134
	57.9818	26.0424	13.297	3.8103	44.9826	22.4964	22.684	50.4639
	84.124	39.8359	11.1724	3.36428	52.6232	25.6424	28.1195	40.6598
	50.1401	28.3643	11.8309	3.74908	51.4236	16.9403	25.0467	37.5043
	84.3747	30.9948	13.6707	3.24547	76.3227	36.2078	33.7318	39.7676
	45.4563	25.0254	10.137	5.85637	54.9884	25.979	45.3759	31.5248
	67.7978	23.2167	18.8142	4.87615	47.3671	30.4862	38.3161	29.1806
	73.2165	15.3696	15.2089	5.33031	62.6647	22.9072	38.0479	50.5013
	33.5325	19.3684	9.30263	3.84297	43.7674	17.3181	31.7532	37.0215
	28.9502	19.2366	16.556	4.35003	41.8853	17.1311	23.2166	28.0145
	73.6997	17.3933	11.7616	4.71667	50.0998	20.6668	34.3173	30.4434
	57.595	18.8272	10.1629	4.128	43.2346	23.0422	41.8878	38.1875
	46.6881	18.2642	14.4459	4.56295	37.1077	28.0524	21.7093	35.9282
	73.7938	26.7744	10.0433	5.88577	81.2255	23.2587	41.819	43.9184
	44.6854	31.8715	8.02118	3.77159	72.065	17.9817	39.4576	35.3628
	29.8356	26.1837	12.3763	3.84127	54.238	20.9369	57.9691	28.3774
	95.6538	16.3111	11.8932	5.07591	54.1033	29.5843	57.1102	36.0833
	53.2126	37.3845	18.4996	4.26516	56.0577	20.6411	40.947	41.3665
	60.1953	17.3102	11.7244	4.83716	50.2835	25.0703	40.7144	39.3649
	78.9335	21.9663	16.8801	4.11615	64.5463	19.781	33.4279	50.9276
	52.3131	23.9441	10.7383	3.99706	52.0897	23.5981	41.967	38.3296
	48.5671	18.6655	6.88741	6.77349	45.2575	20.0316	23.3953	66.6325
	76.486	105.082	13.0269	3.34322	52.2928	12.7616	31.4643	72.5236
	29.3634	21.0296	12.7239	5.00482	41.7595	15.83	36.7909	54.3777
	71.2148	41.6739	17.2732	2.97242	58.8542	27.6084	69.774	94.1011
	36.9287	20.1999	16.0195	4.07952	55.2696	16.2397	31.3865	38.3523
	109.431	23.4249	12.231	3.21626	41.671	18.0218	37.3792	28.1756
	36.1029	31.6237	12.9054	4.6989	36.7738	23.2582	27.0811	29.6941
	43.8419	25.9309	8.64719	5.90927	33.5747	21.5929	39.9302	42.5907
	37.9521	37.1679	10.5197	4.14779	42.355	16.8832	45.6671	42.1065
	48.0029	24.6894	11.1347	3.38348	68.1603	23.277	29.7841	29.5892
	43.0292	24.8323	12.0108	3.72823	41.3422	19.3199	36.3602	52.1673
	42.0806	19.4542	72.4454	3.13339	37.768	16.8292	32.8232	38.8475
	31.0682	16.818	13.3089	4.93253	39.4496	17.2576	32.5915	39.549
	51.7679	25.0232	11.2647	6.33372	50.7453	13.8907	28.4335	55.2225
	78.5165	23.2	12.4394	4.87892	44.6317	19.3344	29.3709	44.9215
	67.5226	15.3383	13.4323	3.96008	41.5807	21.8209	29.7604	61.767
	38.9008	18.3326	10.4204	2.96555	55.9045	18.1602	31.9452	55.1118
	125.458	18.1476	9.85156	5.337	44.662	19.4833	19.3439	47.4364
	49.6079	12.2899	10.9575	3.33989	39.0337	24.5485	29.4792	31.8715
	41.6299	21.4931	8.86202	2.56686	39.1829	144.08	32.2347	37.6828
	103.361	19.4005	10.5699	3.41185	47.7163	20.991	24.6612	40.577
	56.5983	13.9299	12.6241	3.39666	39.313	15.0531	26.9161	43.9225
	68.6946	17.7475	24.1942	3.70778	59.9614	23.9982	24.1296	42.925
	92.3954	28.3745	10.6604	3.62044	51.7555	22.9622	22.931	41.08
	82.1682	22.3677	11.811	4.29287	48.5402	22.2916	31.9806	36.3645
	41.3974	40.4534	10.7472	7.65866	51.1073	32.2897	31.1324	30.393
	43.7469	23.9185	14.2065	3.36303	44.6269	21.4414	43.355	52.4132
	42.0766	36.1268	8.79672	3.20183	95.1677	21.6278	45.4921	53.616
	47.9572	20.2109	14.8141	6.6062	32.8445	24.0949	34.5043	50.0524
	65.9731	23.8888	7.8055	6.88992	41.9453	22.5191	24.1788	42.3434
	89.952	25.256	10.0487	4.33826	31.798	17.839	22.1453	66.0259
	320.976	28.8315	16.5604	6.27441	47.3794	22.9975	26.5837	46.2201
	168.091	54.547	15.6612	5.5377	50.9833	21.635	29.7996	102.498
	51.1651	24.9044	12.2413	4.45162	34.8902	14.9982	35.3546	60.8599
	68.5917	16.1362	22.0847	2.88068	35.0986	52.6959	32.411	29.2936
	29.6472	78.98	9.98396	4.41156	39.2718	21.2788	29.3768	39.1919
	86.6607	20.4027	10.5148	4.66457	36.4439	24.7145	34.3053	44.0009
	157.961	30.5169	12.7686	5.18686	92.6064	18.1313	27.7157	52.653
	47.3785	28.8732	13.4785	2.55616	59.7306	20.8684	76.8276	61.1624
	29.81	31.31	12.7668	3.0856	51.4708	25.5393	28.8165	41.067
	53.1687	28.8477	13.2246	3.93371	39.0348	24.5285	61.457	32.4351
	110.636	21.7212	15.6805	5.07066	35.9808	20.6576	41.9926	34.8288
	67.918	12.7534	11.3373	4.37119	31.8721	18.6761	55.5125	47.9716
	50.9711	40.3108	9.86389	5.26258	46.2273	20.3944	36.069	31.5919
	71.3991	14.8979	17.7053	4.56944	38.9052	21.0442	20.2701	45.0364
	96.8489	38.0015	9.5487	3.92255	32.4438	18.7562	89.8346	60.0419
	43.5106	16.1477	10.5514	4.31157	33.562	18.5797	40.3284	32.3004
	47.8297	23.5166	10.1002	3.29038	52.9817	26.3482	55.8699	42.7489
	35.9435	24.2848	12.2419	5.51124	32.5576	16.0169	55.5914	52.5378
	61.5441	40.4338	11.2855	4.54887	37.9191	23.5449	35.5101	65.3512
	67.1928	28.0959	10.1686	5.35078	43.3503	20.6708	35.844	40.8894
	63.9578	19.4184	8.70551	4.80525	41.1023	31.5674	28.5357	71.0044
	230.543	33.7193	12.3284	4.07799	77.8869	18.9413	77.1577	45.2892
	62.1701	69.4481	9.97317	3.38774	48.1923	38.5458	35.9916	38.2133
	26.7953	17.7049	9.96995	3.78894	44.9501	16.8651	55.6544	35.204
	48.5108	44.2879	12.1108	3.67766	59.9664	13.8155	44.8043	55.1421
	60.2883	22.9409	9.49687	3.25347	40.3176	17.0863	34.1297	86.4867
	47.108	26.9163	9.20689	6.47041	40.3236	22.8518	48.8417	51.2037
	30.8522	39.7497	8.43584	4.61231	34.8635	20.4502	31.9683	50.0969
	43.0267	27.8939	11.1567	3.78807	40.608	13.6483	34.532	35.0999
	27.5678	19.7261	15.1612	4.66262	42.9947	28.7557	30.0694	46.3236
	109.729	22.0442	13.2742	5.40335	41.9399	23.4603	85.5291	41.0011
	52.7562	31.5434	9.77495	5.50157	55.8692	15.047	32.3157	34.1949
	61.425	18.7891	11.7973	6.27939	40.6169	23.4016	24.6415	34.3082
	85.0337	28.5805	12.7385	3.48061	45.2352	17.8771	34.0642	38.6785
	26.826	21.9428	13.1617	4.78206	73.6683	23.4504	34.1359	33.6476
	77.4364	26.4418	9.16511	3.07059	59.0422	35.6256	24.6318	48.9494
	58.5188	39.4389	12.3522	3.50936	55.514	21.9047	32.3193	47.7276
	62.1116	64.53	11.6078	4.43394	38.4865	14.3797	31.3229	37.8006
	80.9815	22.8399	8.95078	3.80374	60.2866	18.3869	25.7974	47.2388
	54.0929	21.6274	15.4301	2.77721	66.2851	20.9228	33.4966	80.8923
	68.5976	27.9425	9.18678	2.86612	91.9376	20.5566	25.3291	73.1941
	36.9484	18.6573	13.7312	2.92091	31.3353	18.0212	45.6411	123.329
	32.5792	39.8943	14.6512	3.22704	55.5408	21.0472	31.8796	39.7561
	55.3786	35.9772	10.365	5.40198	43.5927	21.8573	23.8949	82.2566
	41.707	27.443	15.4322	4.79148	31.5588	16.8233	48.9611	24.4402
	41.1374	21.7697	11.0062	4.33452	48.4233	21.221	31.7848	189.914
	31.0911	22.718	11.4207	3.50727	44.7995	18.1508	25.762	44.0937
	54.324	20.0731	10.4375	3.92855	39.7522	25.4275	46.2916	35.6996
	136.527	24.8971	11.6083	3.27979	40.7759	19.6518	29.1727	74.5468
	43.2522	20.5466	16.769	3.8285	62.1604	20.2375	32.1426	24.7441
	152.014	147.101	10.7522	5.00676	36.5364	26.6382	70.7848	50.7123
	107.201	29.8357	11.3632	2.61981	36.3587	17.7463	29.0091	37.7098
	43.9311	25.6544	9.49222	4.18429	46.9408	13.7097	29.9804	67.8775
	34.8154	28.8511	12.2753	4.09077	42.3754	21.743	36.5881	67.4222
	37.3112	28.5407	10.8278	3.24627	37.2613	13.8185	47.8869	44.0514
	51.9533	33.8531	12.645	6.03087	103.59	24.0755	26.6534	49.1286
	29.8635	29.7944	8.68024	3.9481	38.0345	31.408	29.0207	41.9637
	77.2808	26.5874	14.2882	3.49444	45.0926	14.7556	26.7079	36.3655
	62.0483	29.008	9.8117	3.35357	51.3519	21.8384	31.0473	34.8153
	32.3377	50.977	9.86274	3.69768	52.4134	22.304	24.4011	45.182
	104.748	28.286	17.3661	4.77329	39.7207	22.1446	32.49	23.9359
	80.1202	26.2433	10.2342	5.65796	36.0628	16.2159	25.3718	48.6564
	67.3641	25.4781	8.47338	4.11603	45.8077	21.6138	49.3231	95.2483
	33.961	22.522	14.6962	4.47556	42.4399	20.6671	28.1995	62.924
	92.8289	24.8336	12.1963	3.76792	39.9563	28.7031	22.2093	36.7132
	62.6235	27.3107	10.23	3.87214	35.7979	21.7439	28.794	43.7496
	75.6125	21.9094	27.9428	4.69321	33.2563	18.4209	26.0542	43.2689
	57.7187	24.036	13.0632	8.73566	46.108	18.5409	25.0518	41.597
	29.6076	18.1358	13.0717	3.6523	36.4963	23.1452	38.9821	56.6064
	44.2604	26.7051	15.9078	3.68453	64.2566	27.5638	33.0558	133.038
	90.8838	22.5565	11.9736	4.85579	42.1211	20.9263	37.1702	57.3791
	51.7193	18.3469	8.47686	4.6905	55.4682	22.4301	70.8944	54.1285
	71.4725	23.602	10.2593	4.20599	56.6019	21.5698	35.3291	51.3294
	42.0989	24.4168	12.9741	4.72582	36.2545	19.0931	66.3062	59.1822
	77.3439	24.5399	7.34597	4.17169	38.8829	12.5863	30.1593	287.934
	78.4051	14.3368	11.2692	3.58012	38.0294	17.4022	32.9716	239.043
	60.7823	22.2887	13.4469	3.04998	39.8459	20.1847	30.7337	36.702
	37.8558	22.8456	10.6637	4.72077	45.3426	23.7739	23.9714	152.807
	82.9834	23.7753	9.94392	4.09573	56.3683	25.0053	26.4239	34.378
	39.0268	17.6551	12.0269	3.12219	48.8272	22.3046	39.4344	72.3698
	28.8451	30.8768	10.9853	5.4936	40.1207	27.6676	36.0809	67.4025
	56.764	20.8106	16.1191	4.36937	51.4363	12.3662	34.0803	36.4076
	49.0041	18.5237	10.9322	2.53576	33.8637	20.2709	35.1084	71.0863
	52.3037	16.5377	10.9146	3.9228	33.5444	33.8862	29.0431	42.3044
	24.4786	19.4795	12.2107	6.51339	60.0322	24.6166	24.7646	42.6227
	39.0289	29.6588	10.0057	3.6321	54.0564	31.8998	28.331	30.9945
	36.5177	19.185	11.6492	4.21166	34.8695	13.7933	30.3741	139.365
	57.1604	21.1712	14.6272	4.84879	50.0154	24.7957	31.9509	77.7671
	40.3389	32.8425	8.63986	2.92058	39.5931	29.6211	28.2856	44.5274
	46.4607	17.4918	8.8768	5.78959	42.6359	28.0654	30.3709	30.3738
	55.7331	28.9565	11.397	11.5721	38.8268	21.5915	27.5399	58.5257
	30.7841	12.9175	10.8385	4.38103	42.6482	30.8536	26.2889	39.6469
	30.5702	25.6183	10.4182	5.29658	42.7871	19.6912	23.7838	39.8112
	28.0762	101.096	9.87959	1.76741	40.9863	25.2614	84.8272	42.4729
	127.742	14.7959	12.1967	5.32231	43.6776	33.1024	33.1508	35.2296
	41.1894	23.0172	12.4973	3.6166	42.2344	22.0052	27.2232	51.3493
	34.4682	24.2743	9.5512	3.8442	44.1264	24.2871	28.6341	53.5436
	48.5872	56.7709	9.86176	2.4952	40.4245	25.8265	67.9776	39.559
	35.1901	21.3521	12.8216	3.29599	43.7715	18.2245	29.6227	27.8274
	84.6992	15.8016	8.75718	4.30405	38.3437	20.0056	36.1182	45.8733
	88.7946	26.1215	8.50685	3.39289	79.3454	24.7154	25.0678	35.9408
	33.5845	21.578	10.299	1.69153	36.138	24.2133	32.0656	32.4662
	38.506	23.3486	13.6644	3.04134	33.9228	34.8413	32.3318	28.1348
	38.716	22.3516	19.712	4.29488	50.0013	11.5141	32.1821	76.7625
	68.1858	17.1379	12.7265	4.4473	43.2007	21.3634	31.1482	37.9322
	43.5368	25.4632	14.2314	2.63175	48.2235	25.8235	89.3864	60.0895
	66.2087	23.693	13.739	2.69397	43.3715	14.702	24.0665	64.2125
	38.2201	15.3846	9.85991	4.64715	37.98	21.5684	40.3597	47.3766
	48.0407	19.2656	10.0716	4.63987	166.299	16.5532	28.4836	46.4732
	118.981	21.2781	9.57673	2.71313	44.625	22.2103	28.823	57.7567
	127.272	33.3284	19.4959	3.57047	67.5172	14.1492	30.6684	116.233
	46.9922	29.6348	8.86571	4.47982	43.2953	20.266	41.5594	53.3054
	35.9398	21.3296	13.0416	5.12189	46.1911	20.9637	30.4981	44.7537
	101.551	34.6349	10.1931	4.11546	51.6622	17.6898	27.6663	53.7157
	64.2331	22.3779	8.37354	6.89679	37.812	32.6206	51.8542	40.7308
	35.7114	19.4186	8.66529	3.29066	37.8875	22.6208	28.7514	44.6308
	53.9127	42.2507	11.1647	3.70862	41.7755	19.4854	28.7187	36.7925
	102.852	20.8047	25.3916	4.8861	42.1304	21.7168	28.032	28.1021
	74.3146	17.003	12.9013	4.1091	40.674	30.0211	38.25	35.1658
	47.8511	27.2442	7.9422	3.28966	48.0947	15.5477	28.7448	40.2637
	43.887	32.2778	10.6257	2.9571	45.2137	18.0139	31.6302	51.7612
	53.2906	26.5679	9.29413	4.57478	41.6647	26.1695	24.3621	41.6137
	108.095	21.557	11.8403	3.0358	95.6923	16.5315	32.741	36.0058
	111.5	19.8286	13.8908	6.25315	43.714	18.8223	21.1382	59.8185
	35.1497	25.9414	12.7163	3.26699	46.5693	21.6672	28.109	40.6284
	65.7137	38.6506	11.1712	2.93462	39.5419	29.2544	34.5144	35.1538
	68.4324	36.8459	9.26619	1.81855	42.0593	27.7267	83.4725	26.5806
	30.4617	18.1709	20.9224	3.7878	44.0118	29.8111	32.8714	52.4356
	28.0326	27.2131	13.4107	4.36615	40.5208	13.2248	35.3821	25.508
	43.1658	20.3154	10.7537	3.01669	46.7199	32.8764	30.0954	39.108
	44.9985	35.0595	12.7305	4.5621	39.5974	28.1917	27.3858	52.9025
	46.6454	33.2304	12.3158	7.07952	34.8161	19.197	40.5503	92.6196
	31.1513	15.4643	14.2949	2.84158	41.3012	13.6587	33.3357	38.0783
	57.4262	22.973	7.62894	5.41901	39.539	19.3775	50.4963	92.1654
	122.086	69.7174	12.1276	4.06711	48.9918	21.9094	19.3554	42.7283
	42.82	22.0786	10.8651	2.8137	74.4583	19.8355	26.4697	42.9601
	82.639	24.3033	10.2322	3.55697	63.658	14.2155	25.3793	39.2658
	46.0128	21.9888	10.0995	7.69563	37.9159	24.8861	50.4852	42.8908
	35.875	32.997	22.5196	4.09186	30.2839	21.3891	25.0257	34.7112
	24.4335	23.2169	17.8346	4.01711	36.0303	70.8652	25.5232	24.8113
	30.6759	28.817	17.3846	4.10634	40.2076	12.708	34.7697	96.7809
	83.689	26.6774	10.4927	3.97864	37.3837	16.5706	31.1899	45.7129
	40.6411	71.1034	8.32307	4.92044	46.4387	14.5883	32.7146	80.2973
	34.9042	24.0204	12.2213	2.70533	43.746	17.9498	31.9935	36.4667
	35.3476	24.7537	8.62556	3.93339	38.0706	24.0604	25.5	33.561
	69.7219	36.9966	12.6302	3.42858	39.9838	18.7746	28.1108	93.6359
	51.186	27.9539	11.5303	3.37611	47.483	20.5923	30.2969	34.9021
	49.2544	27.3112	14.1313	2.75374	28.7974	14.2072	30.4729	47.4008
	70.7036	17.3277	10.0576	8.75675	41.1236	13.4923	22.9146	80.7342
	27.8811	19.3209	7.976	5.34624	42.2126	30.1263	35.4969	54.7388
	55.4097	20.3681	14.5582	3.88338	39.3096	23.2868	27.8313	36.2345
	46.3981	22.6231	10.126	6.33867	42.5013	32.4354	31.1584	40.8411
	79.3802	18.8413	12.8566	4.97155	38.2192	28.1247	36.1819	37.6642
	60.367	16.3793	8.3525	2.99455	38.1499	19.5782	22.3407	44.6707
	30.3304	14.5421	18.9805	3.94638	27.7061	20.1551	27.0911	60.6646
	32.0914	64.6157	16.4603	1.84194	64.539	22.1205	35.0675	32.8645
	49.4848	23.3098	12.9393	3.49093	36.8663	15.288	29.1868	39.5143
	32.0478	22.3035	9.03018	4.26712	36.0552	30.2027	26.3579	67.2894
	72.6582	20.0812	10.3759	2.73321	40.3448	21.4749	31.3103	58.6964
	45.1236	23.1673	10.6382	3.84293	34.1135	20.5722	37.3839	29.3556
	64.2357	21.1688	11.7318	2.84439	34.3811	19.3017	105.832	54.0163
	32.023	18.8756	12.3894	3.91355	56.5705	11.9937	37.5816	47.1146
	45.1415	22.518	15.7972	4.89249	44.5058	25.166	30.6976	51.1545
	93.5369	19.7631	7.19746	4.65702	75.6245	12.7099	37.5474	37.5898
	32.4256	37.8559	10.3198	4.84177	44.1212	15.3781	33.07	41.6288
	30.8493	22.6575	12.3308	3.26059	44.6838	17.1834	24.2618	54.154
	46.569	20.1409	13.1915	3.83127	46.8033	41.7124	24.3292	80.9558
	33.5678	20.4401	13.4956	5.31703	49.0359	27.968	42.801	33.8612
	67.7653	21.34	10.9027	5.15053	66.28	25.8416	39.095	40.9059
	52.9921	21.2374	10.017	3.86249	29.851	19.0113	28.5619	39.5906
	81.2652	16.5027	8.51729	4.35744	30.025	27.1478	48.7102	30.5375
	132.699	21.541	9.94183	4.59665	35.8663	19.6201	36.8241	36.2718
	50.4211	22.4388	19.8908	8.93362	39.0624	20.154	27.4509	32.7307
	43.5739	20.4425	16.9241	3.71836	45.6462	17.4512	36.0384	54.6733
	67.282	27.0217	9.21008	3.8075	64.2381	24.2052	45.0993	33.0495
	39.1192	15.4911	8.87027	3.78449	50.3385	22.1784	32.2642	33.8009
	49.7521	28.4455	15.7855	4.28613	45.8642	20.7934	29.8978	45.1293
	45.0242	20.2701	14.2678	3.91544	41.9731	20.9016	28.4968	41.1286
	51.1951	25.6251	14.4686	4.31609	36.3582	18.6053	24.5076	54.2481
	38.0937	27.8658	65.9542	4.488	35.7577	22.1575	38.6678	38.3041
	57.4876	28.5381	11.5929	4.99318	39.9442	34.14	29.9419	57.276
	36.2363	16.8082	9.31678	5.2123	40.3946	23.9012	35.4036	47.2419
	57.7597	24.7224	15.2957	28.4261	34.6126	23.4757	33.8845	48.4388
	56.6302	26.4985	18.5159	2.76937	41.9649	20.8538	28.449	31.6066
	85.1426	23.8993	11.8289	8.04002	34.4379	17.9599	34.9082	36.1857
	53.1158	19.5721	12.5526	3.91058	39.5664	20.964	59.4496	55.065
	38.2786	25.1572	15.3019	5.01412	36.8691	16.1915	30.3469	37.3588
	45.3651	18.9925	8.24612	4.52465	51.4361	43.1785	25.8042	41.9589
	40.3324	36.7033	13.82	4.7857	34.8798	30.1079	31.9675	33.886
	57.7369	18.1472	13.4187	5.21169	60.4102	50.1231	41.2802	47.5436
	53.6231	20.8312	8.65528	3.64631	36.9806	21.2251	25.9519	41.2351
	65.7693	23.4241	11.8276	5.67241	51.7271	17.6081	38.1528	29.8022
	40.503	20.2664	10.6071	3.84789	38.1959	21.9892	13.4511	47.9915
	47.1096	20.7307	8.92921	2.5654	44.2557	22.9275	25.9654	40.2959
	78.8411	42.1868	10.1166	1.93601	36.1926	18.5515	32.4225	60.5242
	30.5068	21.8078	13.1658	4.34129	45.7818	29.4409	34.2465	34.7091
	40.8874	19.3706	11.1945	3.84822	59.7134	20.4123	33.0112	41.4434
	55.6102	28.2402	11.2195	4.32114	33.8808	21.8555	33.283	75.3742
	49.9558	15.9684	10.8881	3.25375	38.0628	17.3717	30.2742	26.0834
	35.148	17.2571	11.7638	4.12736	40.6242	21.5209	36.0336	63.4153
	41.4685	23.7218	10.9011	5.80911	43.7012	19.4176	33.7668	34.2342
	79.9552	16.8343	11.8844	11.7509	41.5922	12.036	38.1421	19.7942
	93.2414	69.4137	8.81262	4.77656	31.3737	23.6566	40.4084	152.41
	71.4979	21.815	6.90741	4.23394	46.4374	31.6817	30.2323	55.7696
	61.3106	16.6547	8.79425	3.40257	42.3264	24.4375	32.7492	36.6446
	93.1082	20.8565	16.5328	3.48305	40.6524	23.2046	36.1368	149.225
	72.321	23.9392	20.4433	4.07933	36.2048	21.2589	37.6058	54.8568
	43.4781	26.9029	19.4848	3.03502	32.6849	19.2658	38.8779	28.6659
	60.2452	22.7012	11.7674	13.4963	97.3776	12.7193	40.0583	25.7536
	50.1228	30.5831	9.99694	5.40785	31.5388	18.3215	30.2826	35.0776
	48.256	16.6687	14.9069	4.38183	38.7053	23.8467	42.0413	91.8201
	50.6707	18.7286	12.2687	3.41547	53.6004	16.962	32.8039	40.7406
	113.191	37.3354	10.9804	3.23346	35.6329	26.9088	65.2118	39.4812
	43.862	23.0053	10.2911	2.74571	35.6289	15.5018	29.4782	58.7351
	32.1017	16.7995	8.89899	5.3922	42.6031	14.6497	28.1176	39.906
	35.6102	21.1628	13.0372	4.88456	52.063	11.3492	41.2035	45.3595
	41.7489	18.1415	7.21779	4.23008	36.3739	24.7492	32.2103	29.5186
	90.8592	23.3411	10.2193	4.00635	37.0956	15.8347	24.0398	42.5084
	111.671	17.514	10.4655	4.79172	31.1304	32.9944	20.7954	28.0234
	48.8249	15.8576	11.1892	3.4335	38.7064	65.0728	29.8287	33.1873
	56.9602	40.5929	11.3757	4.5563	53.1822	17.3724	30.7197	43.6036
	34.8111	18.9746	12.9671	3.43036	44.5731	15.3861	29.7762	37.0242
	36.4071	19.9855	11.5853	2.74325	237.791	22.7048	33.3885	52.2709
	30.6931	18.0898	16.3459	5.65522	49.5948	39.866	26.1065	36.9045
	40.1575	17.123	11.47	6.14364	41.4228	37.3042	28.8051	118.603
	49.5386	24.2117	8.72291	4.27352	48.6049	15.9095	28.1682	45.3912
	121.964	20.978	10.9002	3.6051	39.3562	24.9928	40.5114	36.7687
	45.5353	16.02	8.91682	3.68546	47.3496	20.6617	20.3404	31.4484
	54.6713	23.8003	12.0181	4.22494	46.9721	13.0451	35.9856	34.7342
	60.4761	23.0336	12.9381	5.42534	50.8126	33.4616	44.4096	33.041
	74.1193	13.1998	8.53945	3.04322	59.1207	21.1633	31.4555	27.6764
	39.5188	15.7605	12.8576	4.69451	38.7122	16.873	30.4048	46.6844
	40.3916	23.2679	11.7787	4.47874	40.6686	25.1255	31.3601	36.8556
	62.0293	22.4656	12.6212	6.09192	68.3928	27.1981	28.0067	32.1739
	59.2385	17.5998	9.61933	2.17475	36.8895	21.3927	27.7548	54.5656
	39.5813	18.4926	9.02227	8.88672	34.6798	29.2493	35.21	33.8561
	32.8887	49.3138	8.55025	5.61745	34.9847	15.3618	45.4897	41.3191
	57.7037	25.1549	10.0235	2.18193	37.9864	22.8203	45.9729	136.122
	80.6069	20.7428	7.84887	6.08449	38.4945	22.029	33.0528	26.7865
	65.4572	21.668	17.8409	2.33631	43.1312	15.7441	28.1012	35.3719
	89.0595	28.0354	7.63568	4.40784	47.1397	18.1274	27.6633	41.6804
	37.4377	24.806	11.3355		46.194	23.1781	38.6793	61.6311
	59.6332	18.5451	8.3209		38.5028	18.6847	26.1328	39.228
	37.1187	24.8027	16.0468		34.8729	16.4962	25.4097	35.1931
	45.1961	18.4461	6.99993		44.4201	18.5254	32.6889	51.8109
	56.7908	28.647	12.9485		33.7512	23.0949	40.3754	42.2665
	56.3504	19.1746	15.4624		39.9536	26.0332	31.195	50.6391
	53.647	20.3386	8.86252		43.6978	18.4287	29.202	27.641
	68.1973	17.2749	11.0423		34.365	23.6638	35.3344	40.9999
	51.8882	62.9331	12.4957		30.8394	16.3617	36.1062	45.4434
	112.645	38.0239	15.6088		42.5324	21.6931	32.3022	40.37
	34.9594	30.0887	12.4738		49.6329	20.07	28.7902	30.2137
	114.38	63.6586	10.3632		42.5208	20.85	33.174	31.5343
	41.4437	22.3128	11.9766		44.9203	19.1392	17.8219	31.5969
	83.1361	36.6917	9.81227		47.5755	26.0326	29.7532	31.5304
	37.5339	43.746	7.0349		70.3871	15.5059	31.7755	64.9559
	51.1395	50.3648	6.18785		47.6349	25.0491	34.7074	34.1248
	64.8397	28.0115	9.27884		45.2537	17.9091	33.5475	53.5256
	62.5971	20.9713	9.31727		39.4299	20.027	29.837	30.9191
	67.2903	21.3604	13.4907		35.0616	28.956	52.9178	48.1408
	50.8275	21.0344	13.0683		77.6324	16.9709	58.6721	36.1707
	49.0705	28.7363	5.22405		65.4071	14.0786	34.8531	83.4092
	56.939	31.9224	11.6413		40.6174	14.457	28.985	30.0601
	59.6878	27.2848	10.0451		43.5657	21.2312	25.6372	49.8775
	37.7647	37.527	7.00058		33.8504	14.6595	27.6349	29.552
	44.4515	21.8293	9.78791		43.673	17.2841	32.0026	58.7635
	65.4252	23.5104	6.11452		46.3919	35.9995	30.0602	48.6898
	41.0255	21.4471	8.80078		48.0287	21.7087	36.987	62.8269
	38.5211	29.5128	14.1125		58.3633	24.5154	42.4494	49.708
	153.796	38.9619	10.7671		45.7595	18.0923	23.9063	40.2632
	80.6813	33.6625	7.66415		37.8201	31.5149	22.5315	48.8244
	53.8463	17.479	8.96123		35.3569	25.6834	41.6092	45.4835
	53.3128	30.5015	14.1772		233.891	18.328	22.1962	42.7616
	43.3234	14.7594	8.7085		40.7816	68.2517	24.2982	54.3153
	60.9057	69.2574	7.82652		46.1824	19.0454	22.0103	36.5047
	48.1632	51.8604	10.7531		42.8959	22.8985	22.9811	26.027
	67.045	47.376	13.185		37.7143	27.64	22.8229	58.1602
	73.1291	28.989	11.9083		42.1743	21.7913	33.7399	52.3617
	64.1779	17.3509	11.9118		51.5493	14.4475	32.1228	30.2521
	49.2088	25.2009	11.7498		55.44	17.2435	24.438	42.1159
	137.209	21.1751	6.34463		63.0429	18.269	43.3042	36.4859
	75.4094	24.6554	10.2319		38.4382	19.0906	64.9719	51.0909
	57.4044	25.1285	29.9633		35.8351	17.9738	30.5537	40.7945
	138.715	26.3315	11.7206		38.3834	25.9518	25.915	49.4148
	61.8135	19.9317	18.3288		107.203	19.9887	26.7296	41.0155
	92.3851	18.9647	10.1985		42.8381	36.4975	36.8747	28.6177
	85.9798	33.2989	8.54367		41.6804	18.4814	35.1243	76.5098
	44.7604	17.5271	10.9174		52.3692	13.6388	25.6227	45.8321
	68.2927	63.0269	14.1527		37.2874	15.4786	30.2978	34.3769
	56.4892	20.919	13.6604		63.3972	26.6198	21.4869	35.6463
	67.7907	17.4312	13.4836		34.8882	13.5402	34.3958	69.3588
	51.1936	29.0817	8.93524		43.5376	20.508	27.4941	33.0065
	111.975	24.436	13.5985		36.1649	17.512	40.246	40.5382
	95.7196	25.1945	10.6024		37.1163	13.5673	23.0866	44.4024
	68.2112	33.5693	15.1584		34.4765	28.8507	23.8145	43.1174
	37.7922	22.8123	12.0057		41.1947	19.5652	47.1216	50.37
	169.477	13.0695	7.36966		63.1961	15.8745	23.4347	56.2347
	183.138	17.0304	14.3825		61.0218	18.1641	27.6475	108.847
	60.6501	65.3897	13.4076		39.6353	10.2314	36.0378	41.3703
	44.5999	16.9007	10.8265		86.3107	14.5909	22.8208	105.245
	39.1806	39.3679	13.2456		37.6927	16.5351	22.2538	85.0696
	52.6941	71.2086	10.0665		32.3354	68.2403	32.2674	38.798
	79.1264	71.4035	11.6181		42.7348	22.0692	34.8564	40.5763
	70.6102	23.1855	11.7273		40.4352	34.5407	20.1292	64.3253
	45.0847	21.0392	12.9021		45.0682	13.4998	28.4238	58.9455
	59.6629	27.2173	12.1498		36.5981	20.6079	47.5935	33.5512
	50.5108	21.8146	9.71903		40.8219	20.7083	22.8875	40.3999
	44.7399	32.4453	9.5756		41.918	13.9593	29.1304	50.1413
	58.5385	28.4873	13.0936		48.5898	18.8662	24.3384	38.5663
	64.2435	59.5907	12.6747		47.8465	28.9862	25.4359	51.9661
	111.703	18.9284	9.9058		34.1393	26.8919	28.6643	81.7539
	31.8398	58.2108	12.079		43.9332	19.5258	27.3116	47.0946
	280.045	50.8643	15.7863		36.2937	32.1807	32.9462	91.7516
	40.0286	23.9856	21.2939		34.471	20.8148	30.6925	44.8342
	50.5122	29.4035	10.6548		45.9316	11.2245	44.871	215.309
	45.6558	107.472	13.2376		46.3446	16.5547	29.0166	54.5424
	50.3052	23.8835	12.5223		46.481	15.8585	51.1975	77.4394
	82.4934	25.5132	10.8295		39.2673	38.5011	22.3811	31.717
	58.1794	17.8462	9.11499		40.406	35.5345	25.1714	82.2776
	95.7178	31.0059	7.69535		48.055	15.7825	27.9087	65.5995
	59.744	19.2823	15.0695		67.0059	14.4489	65.7227	81.7298
	70.12	26.1419	9.81112		28.5282	41.6126	21.8324	40.1778
	69.2066	34.4608	10.7982		41.4631	37.5818	37.7453	48.7193
	45.3174	18.0087	11.3277		39.2141	28.5905	125.9	52.2076
	347.118	38.9801	10.5136		36.5351	13.3474	23.344	48.2844
	47.8749	27.3545	23.7852		39.0387	21.562	29.7942	89.0324
	55.0588	25.3924	10.9638		38.8754	20.0331	23.7357	43.9411
	48.3338	47.7293	10.5649		43.7534	15.4875	25.5702	61.4922
	65.4647	20.8947	12.1988		44.5358	29.0095	31.9507	83.6144
	72.3105	37.6849	13.4526		58.9638	27.6869	22.4405	48.2528
	93.297	25.1703	12.9069		62.1421	15.4407	17.5097	44.4519
	411.234	22.0017	12.9907		32.3314	16.8935	21.4911	85.8239
	47.5126	19.0375	18.3456		43.9656	13.1072	21.2768	69.5096
	77.526	19.2815	14.3985		44.5152	17.357	28.6005	52.3274
	54.7155	21.4032	10.6367		42.5685	16.2172	36.7338	129.349
	67.7088	22.8286	10.3543		42.2113	32.7078	26.2019	38.4092
	83.2562	28.8744	11.5878		55.7215	36.227	29.8799	46.4301
	40.6218	83.8545	17.5766		68.3812	15.7816	25.7466	49.0528
	69.6823	34.9286	11.1086		32.7744	45.9955	36.896	72.2162
	68.3752	91.9852	13.8605		62.2961	14.2196	23.0938	74.5927
	50.5916	23.449	7.84346		40.1582	16.3959	23.6573	172.21
	46.4486	21.7773	44.1684		54.9398	16.2238	24.8631	74.1442
	29.1512	20.8426	10.7528		43.9713	18.087	34.0665	54.6002
	68.518	40.0843	13.329		38.1972	17.4143	30.7974	58.547
	59.9789	20.4143	12.9163		57.9666	23.1831	32.236	56.7426
	52.6342	19.7174	15.0124		85.2457	19.2869	21.7011	53.2115
[truncated: 1,481 more rows]
[truncated: 1 more columns]

## Sheet: Figure 3
Figure 3B	CHIP	UBE4A	NEDD4L	UBR5	Parkin	UBOX5	BTrCP	RNF4
	1004.57	1274.16	0	0	993.185	0	0	676.038
	1105.03	1401.57	0	0	523.8	0	0	594.1
	924.207	1172.22	0	0	438.5	0	0	621.955
Figure 3C	CHIP	UBE4A	NEDD4L	UBR5	Parkin	UBOX5	BTrCP	RNF4
	0	1325.25	1013.35	1008.96	72.4266	0	2569.18	68.9486
	12.398	1457.77	1114.69	1109.86	79.6693	42.5455	2826.1	75.8434
	127.623	824.5	932.286	1801.22	246.81	37.112	2142.55	63.4327
Figure 3D		BioPROTAC expression	GFP intensity
	Control	2.31091	2.05571
	RNF4	2.33253	1.8279
	BTrCP	1.84986	2.17494
	UBOX5	1.82223	2.38074
	Parkin	2.37194	1.87594
	UBR5	1.76595	2.36665
	NEDD4L	1.75742	2.34595
	UBE4A	2.38501	1.85322
	CHIP	2.37359	1.8214
Figure 3E	G93A no mUbL	Control	RNF4	BTrCP	UBOX5	Parkin	UBR5	NEDD4L	UBE4A	CHIP
	3.47525	1.89456	1.86711	2.71164	2.01576	1.59662	2.16094	2.86794	1.83313	1.56862
	2.20239	2.05911	1.82303	2.36129	2.04669	1.85856	2.52575	2.79427	1.7615	1.67046
	2.50252	1.93673	1.58481	2.33794	2.01183	2.02426	2.35749	2.74913	1.96179	1.96553
	2.19768	1.7919	1.82616	2.34118	2.06531	1.66405	2.11224	2.91173	1.88298	1.58476
	2.64407	2.11405	1.59092	2.4466	2.46611	1.79598	2.39145	2.54929	1.8196	1.56817
	2.31705	1.83483	1.86679	1.85147	2.72022	1.54651	1.91775	2.71791	1.64689	1.73758
	2.68425	1.75379	1.75448	2.13856	2.16009	1.74533	2.21661	2.75005	2.2187	1.64364
	2.91118	2.01124	1.83417	2.65955	2.46155	1.61233	2.15025	2.51475	1.9006	1.7204
	3.41191	1.79781	2.08914	2.06805	2.07156	2.45337	2.63248	2.46089	1.85057	1.80154
	2.1937	1.87588	1.76898	2.34191	2.35412	1.82827	2.44267	2.28251	1.84213	2.21006
	2.56866	1.87817	1.72253	2.08624	2.86733	1.9039	2.54883	2.67967	1.7556	1.61681
	2.29889	2.0101	2.00359	2.34613	2.37891	1.82443	2.70538	2.53375	1.92968	1.51579
	2.64615	2.14068	1.96938	2.35954	2.88191	2.17834	2.46949	2.61751	1.74611	1.77063
	2.83151	1.86406	1.84892	2.92849	2.57635	1.62271	2.33297	2.27515	1.76202	2.4259
	3.46759	1.88475	1.73971	2.50459	2.89828	1.67599	2.95988	2.05477	1.58881	2.08093
	2.49276	2.17537	1.95433	2.49071	2.1532	2.55671	2.08854	2.20486	1.76812	1.53182
	2.07055	1.93383	1.95199	2.08978	2.89856	1.94213	2.55911	2.10859	1.85282	1.33675
	2.57584	2.01769	2.00869	3.04135	2.02632	2.3491	1.99362	2.43887	1.62129	1.78684
	3.35227	2.09782	1.82985	1.9087	1.9887	1.74124	2.46732	2.27644	1.64716	1.73254
	2.62804	1.95948	1.59518	2.23098	2.7206	2.11432	2.35935	2.05179	2.00336	1.66032
	2.91196	2.15838	1.81083	2.92806	2.01596	1.68265	2.16965	2.0252	1.95251	1.7817
	3.44702	1.79219	1.70706	2.08418	2.3125	2.136	2.55452	2.7111	2.18697	2.12318
	2.70238	2.08406	1.71267	2.52613	2.09804	1.7397	3.32475	2.60758	1.95383	1.6376
	3.27455	1.7682	1.86731	2.78474	2.40465	2.11945	2.15057	2.20015	2.00208	1.8257
	2.48157	1.76505	1.95098	2.30685	2.1427	2.27978	2.48173	2.63632	1.78386	1.87993
	2.79538	2.11501	1.75766	2.54421	2.4326	2.17031	2.80384	2.05054	2.14837	1.65043
	2.51145	2.14298	2.04341	2.3199	2.39433	1.92046	2.37436	2.13854	2.59936	1.65474
	2.77642	1.94211	1.84069	2.27081	3.03006	2.20156	2.33568	2.51839	1.97113	1.78892
	2.51962	2.065	2.50286	3.10761	2.3563	2.20583	2.28998	2.47983	1.81797	1.75234
	2.95921	1.84259	1.76008	2.93384	2.18395	2.02098	2.76956	2.19988	1.91319	1.94214
	2.74962	1.93307	1.92477	2.8077	2.41146	1.65268	2.93472	1.9775	1.83805	1.73788
	2.73005	2.2298	1.57232	2.5715	2.58768	2.4739	2.8843	2.33265	1.75842	1.76999
	2.36054	1.96559	1.94472	2.39757	2.2125	2.14312	2.42066	2.10931	1.84595	2.02637
	2.64245	1.76846	1.95892	3.08882	2.0689	1.69325	2.08669	2.02021	2.18529	2.03574
	2.34477	2.03105	1.72117	2.1069	2.58549	1.86634	2.61324	2.6047	1.88187	1.64735
	2.63458	2.42622	1.60945	1.99057	2.7284	2.16386	3.13231	2.4807	2.22186	2.19674
	2.16162	2.15605	1.6624	2.56049	2.17602	2.26839	2.10246	2.56181	2.08912	1.95749
	2.37732	1.98702	1.87714	2.2771	2.46934	2.05142	2.51345	2.02384	2.2551	1.71437
	2.90423	2.12157	2.10156	2.98508	2.48912	1.71286	2.65095	2.35077	1.7998	1.76996
	2.15789	2.07305	1.95202	2.38904	2.81373	1.96665	2.46564	2.12443	2.22656	1.69362
	3.05166	2.18242	1.77161	2.16512	2.52501	2.49959	2.15291	2.04353	1.80998	1.58777
	2.17045	1.9104	1.92878	2.23625	2.16444	1.64161	2.86502	2.50954	1.83775	2.16801
	2.75891	2.25617	1.61746	1.88714	2.3458	1.91501	2.34632	2.167	1.88533	1.57838
	2.4261	1.80554	1.62219	2.29448	2.42463	1.75836	2.68943	2.03529	1.72565	1.64027
	2.81161	1.40525	1.9145	2.43062	2.16447	2.05229	3.17076	2.72226	1.82853	1.78814
	2.29988	1.62436	1.75045	2.40825	2.11968	1.70403	2.15475	2.16969	2.41179	1.69988
	2.4687	1.50152	1.67071	2.02521	2.24592	1.8958	2.90403	2.12962	1.82051	1.53942
	3.08015	1.9852	1.61711	2.65168	2.13955	1.8335	2.08393	2.78676	2.10778	1.89013
	2.22177	1.44725	1.69938	2.00186	2.24138	1.98906	2.41008	2.39176	1.85362	1.41729
	2.39954	2.14689	1.71256	2.78038	2.28586	2.22596	2.45208	2.61	2.13231	1.5862
	2.19532	1.67145	1.6487	2.19637	2.10187	1.6783	2.99574	2.29835	1.80182	1.62012
	2.12241	1.79476	1.83253	1.98068	2.08761	2.10148	2.15558	2.42977	2.13557	1.90069
	2.83612	1.78917	1.99045	2.25666	3.04222	1.78112	2.07625	2.36722	1.8704	2.1239
	2.21127	2.11711	1.86543	2.97322	2.27691	1.80804	2.08182	2.37888	1.80686	1.57722
	2.32521	1.81281	1.57899	2.66146	2.23186	1.93748	2.82013	2.00699	2.02706	1.61991
	3.08361	1.81845	1.78451	2.82573	2.18572	2.1795	2.7199	2.12859	1.55678	1.80753
	2.05983	1.71604	1.80067	1.883	2.18571	2.60849	2.24718	2.06804	1.62817	1.81951
	3.24154	1.72226	1.59946	2.7455	2.45456	1.89144	2.22233	2.09407	1.94706	1.62917
	2.17047	1.67066	1.73129	2.77474	2.60426	2.06315	2.07229	2.09184	2.18043	1.8318
	3.18028	1.79727	1.80882	2.29097	2.56657	1.74963	2.32411	2.0567	2.16213	1.69663
	2.56584	2.76971	2.39233	2.54736	3.11978	1.83079	2.42796	2.30673	2.07877	1.47972
	2.16625	1.73777	1.79569	2.12334	2.55128	1.72089	2.7427	2.42828	2.52925	1.8246
	2.71877	1.73916	1.79557	2.08489	2.83387	1.97	2.95646	2.19057	1.79673	1.85224
	2.56998	2.06642	1.94131	2.08715	2.40064	2.08114	2.87467	2.02467	1.87927	1.78097
	2.89605	2.08065	1.98296	2.43118	2.53053	2.04542	2.26808	2.14513	1.87171	1.53631
	2.47873	1.53367	1.80083	2.12218	2.86099	1.95521	2.40159	2.11999	1.96996	1.96077
	2.4293	1.77829	1.6682	2.08924	2.28587	1.83691	3.2468	2.16781	1.65257	1.47854
	2.68302	1.9176	1.7783	3.16379	2.43328	1.81982	2.87272	2.6489	1.85974	1.66782
	2.54723	2.38294	1.64819	2.00174	2.21398	1.70133	2.29855	2.25857	1.77073	1.92937
	2.7326	2.1777	1.70627	2.00458	2.22946	1.95845	2.43794	2.28104	1.71815	1.91423
	2.02727	2.07215	1.90239	1.92467	2.15866	2.00825	2.63362	2.45962	1.81714	1.73099
	2.55493	1.90055	1.95685	2.13081	2.80244	1.73382	2.04382	2.04259	1.65251	1.71072
	2.10274	2.34326	1.91351	1.95219	2.44551	1.85639	3.07679	2.22018	2.01704	1.98267
	2.76423	2.11529	1.85933	1.95316	2.12308	1.73818	2.68324	2.05697	2.03552	1.7107
	3.33928	2.01995	1.87648	2.52454	2.45156	1.84812	2.25886	2.19944	1.75933	1.54738
	2.21325	2.12155	2.27501	2.12262	2.2209	1.7328	2.51443	2.65114	1.77095	1.88685
	2.82665	1.96438	1.69463	2.23938	3.33148	2.17082	2.79548	2.09142	1.92029	1.39647
	2.29588	1.76018	1.80145	2.5934	2.81461	1.73575	2.22449	2.95757	1.91804	1.29809
	2.53562	1.72557	1.88554	2.10939	2.52581	2.21898	2.61499	2.83665	1.67427	1.60003
	2.32242	1.53512	1.90068	2.54982	2.45053	1.70652	2.84689	2.12024	1.6264	1.8277
	2.40103	1.97476	1.78412	2.09655	2.69226	1.90603	2.31434	2.30396	1.93659	1.76217
	2.47265	1.89974	1.80095	2.09672	2.80452	1.63042	2.1106	2.4901	1.64944	1.7147
	2.91658	2.00529	1.689	2.26261	2.85319	1.9825	2.54926	2.51902	1.57641	1.57794
	2.73211	2.46355	1.52888	2.87035	2.26265	1.90524	2.61152	2.68852	1.92936	1.89451
	2.54418	1.86997	1.82924	2.10569	2.49978	1.84996	2.48099	2.45924	1.79033	1.50352
	2.65859	1.74331	1.71108	2.31972	2.21162	1.80334	2.08574	2.77486	1.95301	1.77293
	2.49734	2.26669	1.83117	2.00698	3.00796	1.96623	2.31485	2.57818	1.76853	1.77442
	2.45809	1.64389	1.69308	2.16311	3.04988	1.56822	2.48815	2.48327	1.94849	1.69989
	2.76645	2.16401	1.78119	2.23914	3.27867	1.8737	2.23036	2.12967	1.91226	1.69602
	2.40547	2.21293	1.76416	2.02016	2.56164	1.71802	2.5313	1.93492	1.71422	1.77378
	2.23601	1.95158	1.89398	2.76497	2.03149	1.54113	2.65041	3.31012	1.73897	1.52216
	2.65654	1.62481	1.59204	2.06392	2.1178	1.91967	2.372	2.04641	1.73886	1.48215
	2.04269	2.17398	2.0156	2.00792	2.15234	1.95439	2.22851	2.20322	1.60187	1.86807
	2.10243	2.06266	1.67632	1.95788	2.87845	1.67316	2.28436	2.60638	1.67851	1.53262
	2.9479	2.39155	1.50641	2.89905	2.19414	1.98162	2.18179	2.66719	1.70762	2.14596
	2.62667	1.73238	1.89718	2.23354	2.23355	1.74605	2.21156	2.02774	2.04688	1.4651
	2.68753	1.95497	1.88155	2.08351	2.39839	2.1052	2.13447	2.47526	1.70147	1.81558
	3.02888	1.99582	1.65075	2.39633	2.40573	1.62792	2.62186	1.97562	1.67271	1.73284
	3.46783	2.62655	2.01016	2.38041	2.3514	1.68106	2.29536	2.49126	1.84795	1.79105
	2.24277	2.04265	2.11278	1.95393	2.11124	1.77934	2.97877	2.03372	1.71953	1.39922
	2.41872	2.22978	2.07472	2.12182	2.29682	2.18694	2.88847	2.0736	1.99833	1.47602
	2.30961	1.72631	1.91808	2.70301	2.73177	1.90851	2.19902	2.66307	2.43899	1.74703
	2.74897	1.77419	1.72392	1.96711	3.08801	2.44356	2.15617	2.38466	2.8503	1.39296
	2.25267	2.2775	2.09196	2.83835	2.22833	1.56088	2.31583	2.50339	1.70817	1.97008
	2.12458	2.38662	1.76724	2.25834	2.54562	2.06722	2.30209	2.17491	1.93109	2.07583
	2.38713	1.94008	1.76965	2.69867	2.33385	1.61355	2.09604	2.10847	1.85074	1.68153
	2.61077	2.24289	2.03929	2.72988	2.23477	1.72137	2.25179	2.37542	2.10644	1.74545
	2.91685	1.80051	1.68333	1.909	2.22252	1.62355	2.09513	2.17804	1.93025	1.86611
	3.04737	2.12989	1.76771	2.4031	2.06879	1.99333	2.12992	2.44385	2.19455	1.96124
	2.84122	2.2736	1.58123	2.01851	2.07953	2.0143	2.33879	2.13302	1.60156	2.21431
	2.88586	2.11152	1.80428	2.05203	2.08806	1.8289	2.41547	2.79468	1.81953	1.92481
	2.18442	1.85012	1.61494	2.5265	2.48495	1.72041	2.13673	2.17248	2.13355	1.91456
	2.40884	1.93443	1.87775	2.80052	2.2106	2.12016	2.03938	2.54	1.943	1.87754
	2.435	2.02274	2.1048	2.57697	2.01817	1.92208	2.45719	1.92004	1.66565	1.99663
	2.28558	2.08248	1.83983	2.1924	2.23999	1.99659	2.54215	2.26927	1.85751	1.99919
	2.4474	2.14757	1.63224	1.95547	2.07123	1.79316	2.87981	2.40333	1.71214	1.52807
	2.14904	1.97532	1.73675	2.64742	2.1507	1.72879	3.09601	2.68827	2.18147	1.56415
	3.17144	2.12343	1.65045	1.92484	2.9157	1.7289	2.66775	2.11897	1.5877	1.94492
	2.91845	1.88983	2.16365	2.61788	2.17773	1.74307	2.4138	2.02474	1.96446	2.04753
	2.60239	1.61053	1.61702	2.07828	2.04983	2.0924	3.54108	2.55486	2.15289	1.93306
	2.11905	2.03803	1.58965	1.97964	2.1078	1.66182	3.38643	2.14328	1.90156	1.84415
	3.02581	1.91419	1.60885	2.24159	2.35522	1.80781	2.95215	2.2266	2.11599	2.08089
	2.31173	2.00104	1.71945	1.98302	2.01521	1.73554	2.84196	2.69737	2.06538	1.49539
	2.93127	2.12833	1.8155	2.08797	2.15426	1.87855	2.17295	2.15936	1.96114	1.67497
	2.46629	1.82951	1.58431	2.02036	2.38392	1.65969	2.95867	2.02704	1.96419	1.86299
	2.51818	1.99252	1.98163	2.61014	2.11655	1.65461	2.16241	2.04563	1.7838	1.62914
	2.8541	2.0026	1.95572	2.23574	2.55701	1.81549	2.24909	2.0292	1.89937	2.38578
	2.75501	2.0887	1.77241	2.15145	2.40772	1.76317	2.57163	2.36067	1.99626	1.9739
	2.92943	1.94991	1.59597	2.23402	2.09626	2.09484	2.18133	2.18939	1.93484	1.66762
	3.24362	2.14844	1.70327	1.85073	2.02258	1.79897	2.4611	2.32818	1.71559	1.52114
	2.36869	1.82491	1.70608	2.02958	2.54413	1.75288	3.26274	1.97553	1.75691	1.93525
	2.12367	1.95663	1.90619	1.8917	2.65052	1.80269	3.4111	2.08397	1.74725	2.23809
	2.06419	1.85993	1.54063	2.18571	2.22714	1.83384	2.61053	2.08826	2.82752	1.86951
	2.8887	1.84673	1.76686	2.12309	3.26925	2.02945	2.41297	2.19379	1.99455	1.42372
	2.89484	2.30366	1.68552	2.50787	2.1137	1.97764	2.76603	1.94959	1.74041	1.77911
	2.20116	2.20713	1.73132	1.9346	2.30606	1.92753	2.49565	2.07666	1.91926	2.23498
	2.14121	2.21807	1.87203	2.3402	2.13867	1.89873	2.80276	2.17541	1.9385	1.57157
	2.74973	2.1085	1.64174	1.85077	2.12355	1.91616	2.69816	2.39934	2.13218	1.51885
	3.08895	2.17491	1.70723	2.58842	2.39339	1.77262	2.33712	1.99553	1.81473	1.70658
	3.04356	1.89139	1.9505	2.00408	2.59477	1.80284	2.33357	2.04683	1.89406	1.5582
	2.60745	1.8716	1.85713	1.93373	1.99594	2.01393	2.81146	2.22625	1.90449	2.14921
	2.24284	2.10482	1.59115	2.03676	2.33167	2.16312	2.37244	1.94045	1.71385	1.95943
	2.75173	2.60318	1.87273	2.58734	2.60395	1.64039	2.13975	2.77251	2.12419	1.82109
	2.55567	1.9124	1.98079	2.40462	2.1884	2.08662	2.38875	2.05457	1.74254	2.36966
	2.36091	1.86412	1.90812	1.83521	2.31563	1.73273	2.53371	2.06208	1.82387	1.77997
	3.00144	2.12251	2.09012	1.94944	2.41752	1.72848	2.40952	2.01382	1.8282	1.7487
	2.37979	2.06599	1.64253	2.08641	2.99321	1.64457	2.42042	2.00988	1.95253	1.72917
	2.77587	2.1285	2.04743	1.93646	2.04102	2.32669	2.22469	1.99201	2.11224	1.77554
	2.84149	1.85105	1.79523	2.14631	2.30001	1.72079	2.38341	2.07321	1.75843	1.71984
	2.91863	2.21312	1.75404	2.79832	2.28308	2.02122	2.15937	2.40302	2.09316	1.6958
	2.48274	2.09286	1.73258	2.11412	2.35205	1.72137	2.08527	2.07385	2.33456	1.87899
	2.01958	1.88261	1.8318	2.02678	2.19599	2.01143	2.50038	2.05172	2.55623	1.94548
	2.10274	2.3288	1.84107	2.50231	2.02501	1.6149	2.14346	2.68708	2.01476	1.72232
	2.30797	1.77955	2.34203	2.43696	2.75838	1.72343	2.08458	2.45564	2.16454	1.77623
	2.20998	1.90504	1.90244	1.83092	2.3274	1.58655	2.20349	2.07961	1.78467	1.7589
	2.6323	1.77032	1.95787	2.09179	2.28426	1.85833	2.18804	2.21309	1.81828	1.85312
	2.39613	2.11611	1.76833	2.32081	2.13298	1.95138	2.15436	2.58754	2.2661	2.18132
	2.55379	1.9232	1.89747	1.92613	2.09683	2.15275	2.2731	2.02603	2.05567	1.85173
	2.25016	1.94748	1.95212	3.16898	2.18697	1.54215	2.64098	2.46692	1.97124	2.01344
	2.57696	2.18693	1.60223	2.08335	2.20762	2.3742	1.99558	2.05199	1.86132	1.9547
	2.06382	1.98462	1.64472	1.88332	2.23204	2.35059	2.52724	2.313	1.89428	1.99456
	2.51833	1.60941	1.73882	2.10528	2.74091	1.77456	2.66922	2.02033	1.82326	1.79592
	2.22175	1.88475	1.76819	1.94089	2.42908	1.64943	2.30229	2.40519	2.24238	1.8409
	2.44386	1.79832	1.79449	1.96838	2.52753	1.69985	2.51098	2.0382	1.73301	1.93329
	2.33494	1.8386	1.61198	1.79795	2.60062	1.9759	2.34965	3.31948	1.90798	1.73725
	2.17104	1.74729	1.83209	1.98881	2.56413	1.50041	2.9176	2.01438	2.0766	1.67961
	2.31248	2.46593	1.8688	2.36606	2.12843	1.80551	2.26732	2.67129	1.87461	2.32891
	2.07961	1.54151	1.92169	2.01147	2.70671	1.79393	2.33738	2.26966	2.06673	1.70788
	2.48943	2.4542	1.56422	2.08351	2.67413	1.74369	2.08872	2.28835	2.17629	2.06921
	3.48534	1.75938	1.43104	2.14726	2.90679	2.15599	2.58107	2.22964	2.20358	1.61844
	2.35138	2.0585	1.68915	1.85078	2.25537	2.18412	2.59826	2.03505	1.67992	1.56215
	2.42927	2.39664	1.72775	2.29679	2.97997	1.63617	2.12169	2.19161	1.75721	1.79131
	2.52608	1.45562	1.85881	2.35816	2.36983	1.68392	2.39322	2.09133	1.84022	2.07548
	2.3609	1.79998	1.57274	2.74801	2.40669	2.05991	2.69193	1.93426	1.82176	1.99115
	2.22289	2.06759	1.79766	2.23955	2.11957	1.65735	2.07125	2.3019	1.67925	1.5754
	2.09095	2.26594	1.7031	2.1092	2.26012	1.79394	2.06537	2.42114	1.59078	1.59681
	3.03599	1.58111	1.70702	2.16727	2.37357	1.82207	3.35418	2.82477	2.04586	1.7063
	2.03132	2.21411	1.71117	2.83906	2.10752	1.94047	2.82793	2.17988	2.19918	1.86185
	2.21159	1.87669	1.74909	1.8963	2.42482	2.27735	2.40731	2.01712	2.11025	1.90053
	2.51749	1.73277	1.97595	2.01107	2.12534	1.68863	2.17085	2.31531	1.74693	1.86528
	2.69831	1.66162	1.90777	1.90041	2.57043	1.85722	2.80114	2.86071	2.01245	1.53829
	2.10319	2.32941	2.19522	2.15625	2.32717	2.06206	2.15517	2.0835	2.10062	1.85995
	2.16559	2.21446	1.92445	2.29966	2.56512	1.90313	2.09891	2.02009	1.54276	1.76817
	2.35033	1.95328	1.86379	2.67523	2.68198	1.76965	2.6806	2.17573	1.77265	1.98356
	3.03802	2.16052	1.59393	2.11429	2.28589	2.16531	2.86843	2.28102	2.02844	1.55414
	2.16711	2.24048	1.81852	3.04919	2.1172	1.85952	2.44889	2.45847	1.90265	1.8507
	2.82527	1.82061	1.80657	1.79892	2.36185	2.94552	2.38175	2.05168	1.76314	1.54277
	2.07036	2.29571	1.63075	1.9915	2.21607	1.53722	2.2781	2.0397	1.95623	1.96641
	2.13348	2.06029	1.89103	1.86563	2.46584	1.96307	2.81739	3.22889	1.78107	2.03645
	2.82767	2.24764	1.93849	1.82744	2.09329	1.70211	2.64112	2.38956	1.93799	1.83119
	2.63347	1.92696	1.97656	2.46386	2.22625	2.11885	2.16783	2.03147	2.19002	1.82478
	2.33633	1.84583	1.65738	1.83902	1.98029	1.62221	2.44643	1.94706	1.51675	1.81477
	2.59494	1.98748	2.0527	2.67809	2.90349	2.10867	2.53242	2.02777	1.84857	2.40704
	2.11738	1.79072	2.06838	2.41669	2.08032	2.00807	2.2011	2.18953	1.58474	1.82759
	2.4848	2.14273	1.63373	3.00533	2.00358	1.79684	2.07983	2.17876	1.81753	2.13961
	2.51297	1.63968	1.54024	1.83519	2.35085	1.61001	2.69536	2.27591	1.68806	1.92002
	2.5362	1.9115	1.82319	1.71429	2.30461	1.71205	2.35585	2.17355	2.3304	1.56838
	3.28619	1.84456	2.24811	2.01798	2.12463	2.01731	2.06233	2.01247	1.57801	1.79801
	2.03429	1.9449	2.21958	2.2086	2.39951	1.96549	2.83144	2.69533	1.41068	1.98039
	2.20883	1.87972	1.685	2.07023	2.49289	1.89584	2.55635	1.90051	1.88396	2.11263
	1.98497	1.82555	1.63466	2.75913	2.45586	1.99659	2.20147	1.95062	1.65167	1.77418
	2.52688	2.28851	1.90583	1.77483	2.11675	1.75738	2.40237	2.44593	2.05054	1.63493
	2.41947	2.65984	2.22007	2.43763	2.20967	1.92276	2.48919	1.89654	1.74118	1.78865
	2.60868	2.33994	1.79273	2.11347	2.18873	2.03747	2.62758	1.99686	1.84095	2.06597
	2.2623	1.8842	1.87667	2.23325	2.52415	1.9669	2.87493	1.98849	1.80686	1.96289
	2.56142	2.53316	1.7707	2.31529	2.39207	1.84189	3.41214	1.97024	1.9379	1.74057
	2.08345	1.97607	1.78072	1.72046	2.31213	1.82898	2.19144	2.6312	1.89971	2.24323
	2.06623	2.24241	1.80475	2.02911	2.25805	2.02659	2.05447	2.33112	1.64818	1.9433
	2.11269	2.22934	1.80377	1.83872	2.91821	2.03657	2.13001	1.96649	1.95312	1.83096
	2.30461	2.20433	1.84523	2.85086	2.78644	1.92092	2.15696	2.17307	1.74029	2.00296
	2.60372	2.34027	1.68326	2.03566	2.32045	1.88949	2.53419	2.08438	2.03348	1.69953
	2.4578	1.87831	1.68878	1.67734	2.56484	1.93432	3.636	2.0886	1.78945	1.74593
	2.10336	2.49829	1.94136	2.12756	3.02303	1.65578	2.00903	2.3119	1.91783	1.98342
	2.70473	1.76959	1.97105	2.43502	2.84689	1.89495	2.14472	2.84018	1.75394	1.82437
	3.39138	1.78453	2.18938	2.24809	2.06865	1.92016	2.27157	2.71781	1.9517	1.91852
	2.01767	2.28202	1.81368	2.36561	2.59781	1.97375	2.0468	1.98295	1.73281	1.59115
	2.08602	1.98358	1.71565	2.35484	2.65564	1.75613	2.3955	2.38913	1.77611	1.91575
	2.16674	2.08076	1.75707	3.0716	2.58301	1.97007	2.86602	2.33045	1.95764	2.06713
	2.57088	1.86472	1.5148	2.32725	2.01129	1.90408	3.49946	2.05169	1.84528	1.71234
	3.00694	2.52579	1.86931	2.27225	2.17798	1.83955	2.14215	1.97734	2.11224	1.78758
	2.34123	2.42435	1.82547	2.49307	2.16004	1.90898	2.15272	2.28754	2.27483	1.68135
	3.00652	1.64845	2.09835	1.7745	2.42478	1.77316	2.3399	1.97871	1.91486	1.64404
	2.34995	1.62792	1.96304	2.10523	2.07578	1.76341	2.69336	2.06439	2.01486	1.82922
	2.686	2.38214	1.9308	3.17115	2.14458	1.60285	2.51261	2.4186	1.87114	1.91914
	2.96103	2.435	1.6614	2.29667	2.42971	1.72768	2.08067	2.35132	1.37386	2.3243
	2.86745	1.99828	1.7139	2.15032	1.97407	1.67451	2.80015	2.18173	1.93721	1.64716
	3.65863	1.75546	1.53865	2.39692	2.20017	1.8848	2.55248	2.10794	1.61132	1.78462
	2.76078	2.41568	2.2634	2.57559	2.70708	2.21578	2.88335	2.17241	2.01294	1.72335
	2.88082	2.1991	1.80458	2.30916	2.15429	1.76169	2.56339	2.00716	1.84021	1.769
	3.69464	2.05729	1.65131	2.41454	2.03896	1.71532	2.56998	2.20823	1.71347	1.85544
	2.08799	1.97802	2.03623	2.45358	2.05452	1.65275	2.80591	2.0397	1.76376	1.66561
	2.14294	2.14248	1.96695	2.61532	1.94191	1.68662	2.4742	2.55615	2.00021	1.86837
	2.10463	1.63692	1.76683	2.60459	2.84835	1.76096	2.47429	2.03034	1.85492	2.0929
	2.94986	2.51075	1.91004	2.83234	2.64682	1.88631	2.36975	1.99784	1.89441	1.70568
	2.90729	2.06063	1.76675	1.96096	3.15009	1.75248	2.63799	2.25571	1.76798	1.89284
	2.16304	1.58924	1.8101	2.66332	2.16166	1.76	2.53043	2.07983	2.20163	1.57514
	2.22208	1.92713	2.09704	3.10215	1.98225	1.90211	2.95314	2.248	2.21443	1.51087
	2.31598	2.11511	2.2831	2.62734	2.71309	1.60888	3.3301	1.98757	2.22428	1.6065
	3.10612	1.81179	2.03877	1.61615	2.95666	1.95429	2.66178	2.24946	1.6992	1.40035
	2.04193	1.69426	2.04789	3.11857	2.21676	2.06007	2.33909	2.80493	1.9549	1.63996
	2.07857	2.16897	1.72672	2.55192	2.00874	1.3365	2.45445	1.96321	1.97039	1.98396
	2.47061	2.18544	1.7592	2.45295	2.63908	1.85671	2.79491	1.97543	2.41317	1.7052
	2.66444	2.1735	1.66794	2.53211	2.49062	1.76327	2.76476	2.18323	1.97612	1.51998
	3.56574	1.85448	1.59521	2.27905	2.71381	1.68454	2.57746	2.11795	1.84993	1.92371
	2.05686	2.00638	1.86249	2.04661	2.14004	1.88933	2.38266	2.75536	1.95396	1.53076
	2.26146	1.73759	1.83793	2.48158	2.86842	2.30543	2.89905	2.02972	2.15245	1.58454
	2.03826	2.98785	1.65685	1.59439	2.67699	1.877	2.50067	2.02164	1.41782	1.78217
	2.02187	1.67948	2.11853	1.8775	2.67736	2.63616	2.06353	2.41143	1.97647	2.00052
	3.0965	2.4542	1.56031	2.16412	2.58419	2.10524	3.23209	2.23761	2.12367	2.02262
	2.97722	2.16363	2.06871	2.42989	2.37974	1.94755	2.69097	2.84454	1.84722	1.48119
	2.73063	2.02745	1.75812	2.02813	2.70927	1.92434	1.97987	2.41662	1.79691	1.78906
	1.98906	2.16337	1.99252	2.57135	2.42132	2.01104	2.0603	2.04281	1.9846	1.46431
	2.11372	2.13731	1.69909	2.12731	2.39218	2.0923	2.32001	3.30066	2.05339	1.72398
	2.01343	1.65045	2.03677	1.99599	2.36743	2.12606	2.83591	2.47054	1.59245	1.65657
	2.04568	1.80362	1.5234	2.22232	2.16288	1.83949	2.58412	2.99877	1.77943	1.57999
	2.02715	2.23442	1.45306	2.12126	2.37931	1.98475	2.59789	2.51099	1.99382	1.83923
	3.42116	2.2401	1.82924	2.52315	2.24494	1.93993	2.97806	3.01078	1.87992	1.71917
	2.49714	1.77505	1.69323	2.11346	2.86425	2.0079	2.46651	2.07382	1.48273	1.81973
	2.21511	2.20321	1.69585	2.82366	2.94734	1.68229	2.41435	2.10219	2.07596	1.67904
	2.0856	2.22379	1.91864	2.28119	2.16295	1.90591	2.65649	2.24348	1.85785	1.98349
	2.61616	1.8042	1.62635	2.39967	3.39852	1.83659	2.74886	2.51868	1.73015	2.2507
	2.62225	1.55454	1.8333	2.3541	2.13094	1.76804	2.27814	3.10061	1.92003	1.6863
	2.09503	1.73939	1.94633	3.12486	2.71007	1.7924	2.42063	1.98697	1.73909	1.64267
	3.11358	1.6562	1.68469	2.49878	2.25173	1.60911	2.17339	2.46934	1.7626	1.72775
	2.25232	1.73507	1.9521	2.37964	2.23669	1.62395	2.9651	2.48554	1.97801	1.78824
	2.33397	1.91575	1.9671	2.72849	2.26817	1.96411	2.4991	2.09889	1.65408	1.98371
	2.34048	1.94762	1.74574	2.31025	2.75694	2.12433	2.2113	2.33905	1.77638	1.69226
	3.06646	1.53021	2.02531	1.93444	2.71586	1.85444	2.3871	2.80345	1.64721	1.78597
	2.11963	2.16957	2.01971	2.11301	2.37444	1.85633	2.94939	2.63501	1.7823	1.67379
	3.45253	2.25793	1.88672	2.25335	2.33965	2.10256	2.36617	2.23591	1.75038	1.69862
	2.0234	1.91523	1.81968	2.25096	2.09704	1.94731	2.42905	2.0065	1.90881	1.65323
	3.08495	2.24766	1.72074	2.13433	2.10251	1.83803	2.16041	2.75054	1.6275	1.60553
	2.00865	2.06886	1.50615	1.96865	2.42468	1.50171	1.99427	2.54428	1.58898	1.98314
	2.60066	1.50808	1.91876	2.06441	2.13759	1.93425	2.54672	2.20115	1.81651	1.60767
	2.14931	2.23083	1.93258	2.4165	2.43667	1.94646	2.78106	2.64733	1.6461	2.23795
	2.69195	1.37357	1.72613	2.28564	2.20765	1.83394	2.69227	2.2351	1.84443	1.68253
	2.30558	1.59281	1.87779	2.05619	2.04815	1.97846	2.26323	2.86003	1.66087	1.92752
	2.1063	1.91835	1.65912	1.98158	2.56153	1.92526	2.09153	2.55976	1.96179	1.813
	2.21722	1.44295	1.81406	2.38556	2.31717	2.00804	2.88758	2.05669	1.97138	1.82241
	2.24151	2.21723	1.6043	2.26045	2.35072	1.81256	2.56059	2.08359	2.14072	1.96142
	2.31669	2.17456	1.70799	2.55676	2.58658	2.28873	2.18354	2.44128	1.46255	1.81256
	2.93463	1.96898	1.71577	2.50079	2.32236	1.69929	2.47254	2.38889	2.13182	1.66483
	2.08077	1.41319	1.65084	1.93304	2.12353	1.76237	2.56256	2.12	1.92063	1.87823
	2.52086	2.04163	1.92885	1.91235	2.95232	1.80741	2.18139	2.41184	1.84412	1.73016
	2.49054	2.28749	1.57022	1.82801	2.11088	1.83986	2.68475	2.37919	2.066	1.63358
	2.46407	2.18017	1.80003	2.20956	2.14503	1.86341	2.06069	2.07639	1.53683	1.65574
	2.10273	2.07427	1.96074	2.0781	2.45513	2.24805	2.42668	2.65424	1.6588	1.55308
	2.23004	2.1871	2.24818	2.16191	2.37784	1.8075	2.33019	2.44205	1.64014	2.03089
	2.77361	1.96765	2.02641	1.60052	2.25935	1.80238	2.55113	2.14983	1.8516	1.71845
	2.19825	2.3286	1.88311	2.18633	2.19537	1.74005	2.97862	2.21143	1.64142	1.78906
	2.14532	2.17523	1.62402	2.04465	2.60037	1.75869	2.51262	2.31339	1.75118	2.15112
	3.05482	1.99838	1.72143	1.88034	2.19386	1.77154	2.73741	2.64064	1.62839	1.8781
	2.12763	2.21687	1.69118	2.29346	2.6348	1.62605	2.46459	2.65958	1.66593	1.56046
	2.09711	1.72341	1.76245	2.26413	2.65328	1.89513	2.27208	2.0942	1.87223	1.89854
	2.23521	2.27296	1.9893	2.34337	2.16792	1.58591	2.18286	2.57656	2.22187	1.96112
	3.19331	2.40511	2.53037	1.72512	2.83637	2.16326	2.90851	2.22357	1.78413	1.6771
	3.18646	1.71185	1.48294	1.95388	2.58855	1.69073	2.24227	2.55566	1.58448	2.07685
	2.38928	1.9538	1.71438	2.37588	2.1219	1.67625	2.52879	2.11305	1.98019	1.81672
	2.18236	2.02859	1.9361	1.5975	2.08892	1.95337	2.38637	2.17476	2.17342	1.89576
	2.58936	2.09465	2.01679	2.17955	2.91202	2.11937	2.19827	2.08894	1.66467	1.58692
	2.47311	2.7107	2.81002	2.54186	2.10731	1.61547	2.32899	2.06934	1.47618	1.60046
	2.21693	2.24133	1.53349	1.93012	2.16908	1.71286	3.16901	2.27547	1.64213	1.95861
	2.42035	1.78805	1.81656	2.19631	2.50741	1.52142	2.53781	2.48526	1.70241	1.81602
	2.15291	1.64402	1.95879	2.17821	2.21399	1.80489	2.10097	2.23033	1.61538	2.30597
	3.06393	2.14724	1.77567	2.02285	2.61541	1.84349	2.37424	2.57891	1.92444	1.79458
	2.24633	1.75791	2.06172	2.68243	2.15321	2.03196	2.16864	1.99269	2.02917	1.67524
	2.73639	2.35413	2.12415	2.55242	2.46699	2.07276	2.36793	2.00794	1.6361	1.67742
	3.22652	1.95471	1.75018	2.07662	2.18472	1.85061	2.19047	2.00011	2.00733	1.43727
	2.22439	2.01712	1.88829	1.70111	2.34985	1.7238	2.15907	2.17323	1.86787	1.98943
	2.29413	2.31581	1.80706	1.934	2.38462	1.89996	2.63028	2.05481	1.84907	1.94924
	3.24693	2.05004	1.75576	1.73185	2.60228	1.79012	2.69724	1.90073	1.56984	1.92661
	2.1943	2.07335	1.77801	2.52431	2.13518	1.76301	2.23625	2.07323	1.74998	1.58674
	2.07946	2.12702	1.58313	3.00624	2.41006	1.85461	2.51554	2.11877	2.3425	1.84256
	2.12203	2.27296	2.1295	2.10654	3.02711	1.70698	2.23832	2.12061	2.11505	1.89003
	3.10904	2.4766	2.11227	1.78295	2.24422	1.64872	2.53091	2.62813	1.98263	1.76073
	3.41962	2.20552	1.98539	2.52345	2.56795	2.122	2.22966	2.1176	1.70713	1.80808
	2.12643	1.90006	1.72981	2.18957	3.03661	2.0865	2.32851	2.05092	1.9629	1.6272
	2.03966	1.95741	1.43034	1.92733	2.58559	1.69236	2.00727	2.02811	2.0415	2.02134
	2.31228	2.16761	1.68604	1.73461	2.51881	2.03595	2.43607	1.97398	1.66613	1.76826
	2.91317	2.64471	2.17663	2.10376	2.07195	2.06203	2.67642	2.27639	1.52411	1.9003
	2.22912	1.96141	1.63342	2.2072	2.08101	1.88352	2.13258	2.66965	1.76815	1.85493
	2.15074	2.0009	1.8753	2.73375	2.38315	1.89255	2.50629	2.07128	2.18934	1.62713
	2.16857	1.51108	1.92826	2.22463	2.55604	1.63774	1.99063	2.10867	1.73804	1.90494
	2.08994	1.96224	1.81069	2.60617	2.6639	1.692	2.05825	2.22598	1.74614	1.96849
	2.16444	2.25869	1.85624	2.2153	2.66356	1.68795	2.83648	2.45239	2.13295	1.83786
	3.42243	1.94904	1.68653	1.64893	2.45248	1.66182	2.80465	2.02381	1.62929	2.40944
	2.21862	2.23409	2.33642	2.24214	2.66934	1.61592	2.25886	2.04474	1.56184	1.90092
	3.21447	1.75804	2.01448	2.49254	2.57289	1.95051	2.58144	1.99333	1.73541	1.51319
	2.4465	2.29016	1.7259	2.71819	2.28667	1.70964	2.47041	2.06562	1.76073	1.68264
	2.40148	1.59713	1.92212	1.94302	2.6359	1.76969	2.20479	2.2377	1.44258	1.82235
	2.09928	2.12515	1.77052	2.5143	2.20679	1.68682	1.98855	2.25765	1.70081	1.88702
	2.22204	1.8271	1.79187	2.78042	2.24037	2.06083	2.56969	2.08175	1.70664	1.66779
	2.17906	1.96569	1.72988	2.52117	2.47255	1.97683	2.35756	2.06986	2.1949	1.82861
	2.50704	2.50168	1.71385	2.26179	2.26001	1.78929	2.14945	2.46917	1.75582	1.64456
	2.18303	2.22759	1.78159	2.33835	2.07048	1.5346	2.61718	2.19731	1.8457	2.07911
	2.3463	2.00386	2.03729	2.40431	2.11243	1.69669	3.05703	2.27398	1.58662	1.94017
	2.16398	1.54311	1.85019	2.39789	2.22945	1.74491	2.44328	2.36413	1.4732	1.90054
	3.08039	1.97092	1.42687	1.63938	2.57322	1.7989	2.13985	2.15014	2.06555	1.95753
	2.10392	1.90446	1.82125	2.08268	2.70635	1.87867	2.21795	2.49121	1.8844	1.91485
	2.22701	2.12811	2.17629	1.99771	2.6232	1.7447	2.03257	2.18445	1.80395	1.90097
	2.89459	1.62886	1.72411	2.21042	2.23247	1.94288	2.01869	2.02308	1.85924	1.85804
	2.16631	2.086	1.71768	1.68589	2.27518	2.10611	2.16758	1.96545	1.77854	1.72918
	3.21981	1.58243	1.98982	1.55794	2.15222	1.71344	2.81349	2.0707	1.87231	1.69879
	2.17639	2.04357	1.79849	2.51323	2.72501	1.81444	1.93468	2.26902	1.88324	1.78777
	2.14464	1.91417	2.21177	2.1881	2.43363	1.66426	2.0829	2.31488	1.5854	1.88363
	2.22367	1.71927	1.75015	2.28592	2.19299	1.80821	2.54207	2.29568	1.72917	2.12075
	2.37961	2.13301	2.16075	2.38861	2.48438	1.69517	2.74225	2.1907	1.48329	1.83131
	2.78518	1.88641	1.87791	2.4003	2.83286	2.38168	3.77912	2.27084	2.19785	2.06741
	2.29308	2.96073	1.92563	1.95763	2.23366	1.9	2.39449	2.07335	1.72716	1.63173
	2.34333	2.04386	2.06778	2.29246	2.81039	1.67825	2.58521	2.12293	1.80278	1.68707
	2.37235	2.04554	2.09856	1.63464	2.46722	2.06812	2.3995	2.2314	1.78946	1.72096
	2.41487	1.8574	1.76204	1.7063	2.14777	2.05051	2.25025	2.26649	1.94057	1.73361
	2.21715	1.82126	2.13233	2.40835	2.25183	1.79082	2.49444	2.11521	1.93847	1.70726
	2.41546	1.79007	2.11937	2.33957	2.05839	1.83565	2.08402	2.24337	1.54625	1.56098
	2.33242	2.28838	1.71879	2.47011	2.13707	1.81455	2.00537	2.0282	1.63806	1.4288
	2.32462	2.3524	1.79146	2.10429	2.44373	1.83227	2.01356	2.00216	1.87094	1.91258
	2.03412	2.21256	1.56448	2.13691	2.37847	1.98159	3.72243	2.208	1.7795	1.38761
	2.26872	2.068	1.73195	2.54052	2.4456	1.82028	2.53907	3.04302	2.0742	1.66144
	2.31178	1.66998	2.11939	2.38247	2.21786	1.71776	2.22819	2.06118	2.03911	1.72056
	2.13699	1.8698	1.65488	2.10242	3.24078	1.62492	2.48557	1.95995	1.72462	1.71088
	2.6321	1.88839	1.65475	2.15877	2.12505	1.80676	2.47256	2.09616	1.73983	1.65691
	3.18996	2.19512	1.71892	2.21165	2.53412	1.60261	2.60161	2.40794	1.75266	2.05977
	2.24368	2.10994	1.44175	2.09579	2.28226	1.79995	2.2113	2.04128	2.25979	1.65476
	2.25047	2.25345	1.97317	2.65384	2.28638	1.91844	2.27237	2.3175	2.11626	2.17142
	3.24095	1.92852	1.81559	2.0945	2.78441	1.69674	2.43754	1.98954	2.04025	1.42916
	2.31764	2.01489	1.73491	2.77723	2.53586	1.55455	3.07734	2.0028	1.70766	2.15725
	3.31977	2.16455	2.20383	1.95751	2.14211	1.51912	2.4843	2.06967	1.75256	1.61346
	2.80729	2.02791	1.74222	2.4212	2.49553	1.76308	2.49813	2.28263	2.00628	1.44133
	2.08429	1.96663	1.57498	2.06016	2.70126	1.93456	1.93655	1.97787	1.7866	1.68459
	3.13607	2.40331	1.77083	1.4593	2.9568	2.00088	1.99786	2.19324	1.84685	1.79085
	3.01285	1.45162	1.7384	2.44653	2.18537	1.75779	2.32445	2.21972	1.80851	1.66487
	3.57114	1.85444	1.6217	1.88227	2.1002	1.60871	2.8384	2.0729	1.93988	1.66413
	2.20951	2.14841	1.7935	2.60814	2.24566	1.72181	2.05267	2.14611	1.95088	1.6851
	2.47509	1.60337	1.78746	1.85913	2.11974	1.63086	3.17632	1.94084	1.78169	1.81401
	2.70923	2.52693	1.86138	1.7668	2.522	1.71321	2.05152	1.90551	2.05903	1.72407
	3.06798	2.34343	1.90248	1.76354	2.1161	1.89655	2.6663	2.02432	1.95571	1.63729
	2.05718	1.75296	2.62316	2.329	2.54692	1.77096	2.89437	2.12709	2.24066	1.96694
	2.48402	2.01959	1.7635	2.18055	2.59281	1.84132	2.57391	2.44501	2.22881	1.77519
	2.35362	1.47626	2.17968	1.92335	2.18054	1.75224	2.32317	2.08684	1.88231	1.77687
	2.41671	2.12891	1.826	2.43303	2.40531	2.02232	2.22362	2.01625	1.87933	1.74779
	2.11895	1.51856	2.60654	2.41362	2.3263	2.14623	2.13932	2.40095	1.91737	1.74214
	2.74242	2.12712	1.90018	1.85368	2.79327	1.39002	2.36133	2.19741	1.62256	1.71379
	2.61632	1.91202	2.32923	2.18339	2.24423	2.11741	2.20134	2.75526	2.38152	1.70529
	2.66881	1.60969	1.54709	2.851	2.04712	1.67346	2.74619	2.07308	1.76754	2.02279
	2.10288	1.72914	1.64749	2.041	2.26857	1.90246	2.51189	1.96333	2.53219	1.84138
	2.32956	1.78375	2.02409	2.05241	2.30523	1.9129	2.48252	2.04213	1.75997	1.96623
	2.19101	1.92938	2.06631	2.48427	2.67506	1.7313	3.08858	2.17549	1.75309	1.51198
	2.84668	1.84412	1.8284	2.45064	3.16491	1.90529	2.02354	2.04336	1.85246	1.98937
	2.09109	1.97628	1.50171	2.44213	2.24121	1.76473	2.57207	2.20177	1.71595	1.71736
	2.18891	2.05101	1.83258	2.37214	2.06257	1.5854	2.16758	2.75662	1.94784	1.92247
	2.2434	1.63929	1.94093	2.42584	2.05332	1.62122	3.20912	2.25675	1.88799	1.86492
	2.25033	2.00763	1.94101	1.9901	2.30182	2.22081	2.39912	2.23222	1.9273	1.69208
	2.10743	2.36461	1.50783	2.16184	2.10654	1.55218	2.57035	2.2713	1.84946	2.35561
	3.12165	1.79903	2.07392	2.17229	2.891	1.63583	3.26068	1.95585	1.89092	1.83078
	2.78612	1.96451	1.9057	1.67242	2.70635	1.50643	2.38957	2.01146	1.96582	1.83557
	2.23411	1.97062	1.52631	2.27999	2.22671	1.67258	2.48216	2.86424	1.9578	1.71326
	2.14445	2.06196	1.82481	2.16262	2.89913	2.30069	2.19587	2.58797	1.96024	1.88382
	2.32195	2.1151	2.08701	2.29212	2.0271	1.86166	2.25807	2.28559	1.78166	2.24299
	3.71703	1.9699	2.1743	2.19962	2.29268	1.57502	2.03607	2.19411	2.01354	1.65687
	2.26878	2.06856	1.51639	2.87215	2.17183	1.92456	2.66136	2.52207	1.74784	1.7386
	1.96368	1.87478	1.63217	2.16118	2.10678	1.85884	1.99338	2.09185	1.91901	1.87071
	2.16148	2.05164	1.94335	2.04856	2.13362	1.74512	2.77547	2.98595	1.93931	2.27478
	3.50004	1.74274	1.76783	2.64457	2.45339	1.76638	2.13722	2.32146	1.85238	1.59823
	3.02921	1.6664	1.67902	2.64079	2.56593	1.80157	2.43067	2.13396	1.85319	1.68735
	2.25076	1.69605	1.91017	2.08451	2.16451	1.66469	2.41047	2.47127	1.91824	1.56529
	1.96511	2.08944	1.86358	2.39432	2.15234	1.73505	3.40518	2.16337	2.00257	2.28426
	2.18668	2.32677	1.60659	1.77404	2.39049	1.7855	2.72981	1.99078	1.99128	1.68426
	2.79804	1.85573	1.73693	2.2727	2.09039	1.52343	2.56827	2.16337	1.69969	1.60177
	2.18012	1.52358	1.90881	2.24644	2.95666	1.92816	2.74527	2.73867	1.87069	1.78737
	2.63419	2.19515	1.95684	2.56195	2.57926	1.84533	2.10692	2.32761	1.71049	1.51191
	2.22192	2.02657	2.20361	2.04464	2.30415	1.72495	2.53764	2.42673	1.6604	1.78394
	2.3711	2.15076	1.7159	2.1858	2.88996	1.60636	2.72387	2.24721	2.2686	1.88644
	2.06493	2.07594	1.76679	2.02909	2.47685	1.77334	2.09355	2.68377	1.87243	1.44569
	2.96375	1.66247	1.90361	2.10067	3.0188	1.83354	2.07255	2.37879	2.26706	1.63481
	2.81194	1.93356	2.15458	2.6011	2.56545	1.74893	2.71844	2.28458	1.85128	1.8722
	3.19722	1.4281	2.16203	2.20922	2.24164	1.61847	2.15797	1.9686	2.0282	1.74289
	2.44567	1.71047	1.81925	2.72139	2.48033	1.75652	2.66072	2.64336	1.85393	1.7653
	2.60921	1.93303	1.8249	2.22769	2.56117	1.81488	2.39622	2.02802	1.76621	1.67421
	2.1113	2.03382	2.12466	2.24679	2.34351	1.5198	2.32566	2.85766	1.96049	1.69086
	2.23124	1.78674	1.82782	1.83973	2.13183	1.78267	2.18357	2.79161	1.85762	2.04115
	2.08623	1.64135	1.94158	2.39017	2.34308	1.57652	2.27843	2.14185	1.64199	2.14138
	2.2839	2.28232	1.87327	2.27815	2.20061	1.62536	2.6286	3.09326	1.72501	1.9421
	2.94843	2.29493	2.46544	1.90345	2.19954	1.54059	2.43338	2.42456	1.52829	1.59841
	2.26165	1.87753	1.70981	2.43929	2.09831	1.68544	3.32927	2.39514	1.75259	1.67841
	2.06358	1.69616	2.14696	2.19466	2.1544	1.75649	2.75285	2.55907	1.57907	1.62091
	2.70452	2.36365	1.573	2.02685	2.05797	2.05955	2.88696	2.08111	1.89938	1.50801
	2.1223	1.69239	1.94731	2.07731	2.56543	1.95582	2.704	1.99236	1.93835	1.48495
	2.23647	1.96694	1.6431	1.43206	2.42022	1.88281	2.56777	2.68562	1.73065	1.7888
	3.2605	2.2869	1.93568	2.13423	2.09803	1.78006	2.87393	2.06439	1.64949	1.72256
	2.21295	2.10242	1.66669	2.18203	2.44068	2.18582	2.55	2.13848	2.03161	1.5483
	2.24	1.81476	1.61926	2.50064	2.66662	1.58153	2.59901	2.25226	1.61086	1.60919
	3.18613	1.88831	1.61305	2.39722	2.46473	2.20671	2.6797	2.66188	1.97088	1.71189
	2.3276	1.82442	1.69789	1.68929	2.24738	1.62977	2.06833	2.29188	1.94086	1.72337
	2.35085	1.62751	1.50473	2.33769	2.36149	1.7505	2.77932	2.81563	1.76443	1.56799
	2.13963	1.63348	1.57488	1.68991	2.80159	1.65831	2.46909	2.28793	1.52599	1.84965
	2.45463	1.96854	1.81488	2.64874	2.50674	1.88793	2.67753	2.1371	2.06527	1.54023
	2.69785	1.64251	1.87297	1.46575	2.10048	1.69856	2.31172	2.22918	2.0583	1.77775
	2.1401	2.39811	2.00652	2.07142	2.11885	1.48746	2.22455	2.31474	2.21043	1.80126
	2.95575	1.53623	2.35144	2.65187	2.90068	1.76458	2.33656	1.99108	1.64411	1.66536
	2.95747	1.89132	1.8318	2.47079	2.57306	1.97934	2.22872	2.26846	1.63399	1.79109
	3.1594	1.83638	1.68578	2.15218	2.85991	1.75905	2.37439	2.03383	1.76777	1.68753
	2.5853	1.49404	2.17702	2.22814	2.16995	1.55351	3.00222	1.99458	1.64429	1.8351
	2.27815	2.01914	2.34054	1.60831	2.16177	1.97351	2.41418	2.64503	1.65611	1.78974
	2.08174	1.92756	2.03049	1.95671	2.72364	1.44132	3.05136	2.36947	1.91794	1.75047
	2.04894	1.6298	1.72268	2.00063	2.75121	1.72587	2.09599	3.16437	1.61492	1.55374
	2.11096	2.23157	2.01619	1.49297	1.99753	1.8835	2.82142	2.54742	1.65868	1.86943
	3.14829	1.59511	2.14241	2.54262	2.84899	1.52332	2.19101	2.77085	1.67593	1.99026
	2.15805	2.48292	2.20783	2.15145	2.14514	1.69576	2.68974	2.11486	2.06388	2.28158
	2.08496	2.41482	1.97335	2.06928	2.37361	2.2781	2.53368	2.16674	2.07037	1.80899
	2.22614	2.04965	1.74769	2.98911	2.37329	1.60997	2.56084	2.01948	1.7234	1.64758
	2.09929	1.648	1.91404	2.37764	2.08413	1.3571	2.23135	2.07172	1.75145	1.43305
	2.20747	1.42121	1.64124	1.87096	2.09173	1.64636	2.32586	2.06727	1.95419	1.95631
	3.01754	1.87326	1.93638	2.09444	2.33234	1.82481	2.5244	2.28009	2.03809	1.57133
	3.61323	2.22876	2.01876	2.70688	3.02422	1.76231	2.63392	2.9669	1.85558	1.86512
	2.0768	2.28262	1.98073	2.19619	2.26443	1.70406	2.42334	2.56641	1.85199	1.86587
	2.16368	1.89798	2.193	2.09332	2.50929	1.68015	3.2747	2.9843	1.84491	1.75792
	2.05719	1.87767	1.42799	2.38415	2.81229	1.9424	1.93496	2.98558	2.18629	1.77269
	2.67059	1.90835	1.80654	1.91566	3.37838	1.52686	2.29366	2.614	1.82673	2.10716
	2.08683	2.33138	1.66373	1.82313	2.08663	1.61598	3.02488	2.25159	1.82036	1.81899
	3.40529	2.31031	1.84913	2.02649	2.60673	1.95617	1.91707	2.2825	2.13075	2.06137
	2.26908	1.4543	1.79634	1.50882	2.09761	1.71097	2.22863	2.4708	1.83819	2.10853
	2.02781	1.94148	1.89404	1.551	2.68972	2.27286	2.04986	2.55235	1.78201	1.83501
	2.51555	2.16177	1.78338	2.25973	2.51801	1.83904	2.32468	2.06598	2.11387	2.41514
	2.21482	1.95086	1.78053	2.08896	2.58762	1.64661	2.50185	2.00537	2.05627	2.00912
	2.05498	1.61968	1.73903	1.64754	2.14472	1.80403	1.96642	2.12413	1.87455	1.73898
	2.24573	2.34466	1.85085	2.22432	2.07301	1.9562	2.05862	2.13752	1.73451	1.92503
	2.54306	2.23017	1.99819	2.35078	2.23623	2.04723	2.24155	3.03465	1.62359	1.98621
	2.12845	1.898	2.03718	2.53195	1.95786	2.04751	2.63637	2.30139	1.96195	1.70926
	2.49719	2.43154	1.86114	1.83947	2.23819	1.72904	2.54976	2.22818	1.74071	2.03455
	2.2571	2.33948	1.85879	2.17319	2.16209	2.01349	1.99862	2.69104	2.5098	1.70301
	2.36549	2.47573	1.81296	2.35072	2.21953	2.03986	3.11607	2.9242	2.22339	1.77249
	1.98921	1.68555	1.43892	2.22053	2.03204	2.03171	2.59008	2.20337	1.79622	1.82485
	1.99525	1.5813	1.78247	1.93554	2.06651	1.96099	2.33131	2.25909	1.81025	1.76881
	2.05372	2.53378	2.02355	2.375	2.06023	2.05051	1.92148	3.19264	1.9852	1.56921
	2.68916	2.19458	1.67754	2.0398	2.10201	2.10218	2.28208	2.2547	1.89838	2.02959
	2.06497	1.93947	1.59469	2.26022	2.12698	1.81219	2.8728	2.12087	1.83709	2.14774
	2.48964	2.17847	1.7582	2.10979	2.697	1.78675	3.09034	2.34151	1.83431	1.79188
	2.10132	1.62506	1.86542	2.11697	2.09005	1.94948	2.44661	2.08704	1.99769	1.83961
	2.15344	2.09041	2.0571	2.20075	2.12272	1.75632	2.14313	2.14245	2.08637	1.99989
	2.31774	2.34293	2.24776	1.90259	2.36127	1.56397	2.64404	2.06357	1.8775	1.68671
	2.56058	1.7033	1.40969	2.51946	2.0508	2.05986	2.64658	2.62937	1.91891	1.68302
	2.10693	1.85399	1.70573	2.41537	2.21307	1.89881	3.16873	2.0389	2.05346	1.85591
	2.04685	2.13382	1.41513	1.45587	2.80832	1.77829	2.35581	2.34589	2.11437	1.49774
	2.73687	1.61372	1.54377	1.99571	2.14989	1.77525	2.04561	2.84349	1.79332	2.29895
	2.0347	1.87133	1.7544	2.2561	2.03168	1.80486	2.07769	2.91715	1.82511	1.72371
	1.95215	2.09827	1.81984	2.22655	2.29787	2.16554	3.29022	2.24141	2.0359	1.84552
	2.06786	2.27099	1.99708	2.16768	2.52363	1.80661	2.31879	2.20941	2.20614	1.97595
	2.22678	2.13022	1.90754	2.04588	2.42436	2.08058	2.32078	2.95821	2.02002	1.8642
	2.03734	2.11556	2.02122	1.82723	2.84533	1.70849	2.34563	2.09242	2.19605	1.77648
	2.78685	2.0595	1.87741	2.28663	2.02176	1.57017	2.12912	2.10748	1.81809	1.66746
	2.37969	2.06297	2.33333	2.59515	2.48214	1.66511	2.36824	2.67665	2.17858	2.00802
	2.17976	2.0048	1.62392	2.36854	2.57335	1.5931	2.07501	2.63617	1.83129	1.81458
	2.138	1.92584	1.66166	2.6226	3.15383	1.92958	2.08934	2.67778	1.92576	1.68784
	3.575	1.98273	1.957	3.11952	2.69732	2.10764	2.03804	2.82603	2.03702	1.73123
	2.05907	2.2638	2.48231	2.03351	2.36819	1.85176	2.87403	2.13645	2.10225	1.54347
	2.72717	2.03629	1.70518	2.65884	2.90181	2.00493	2.00564	2.1113	1.45591	1.96805
	2.22242	2.10743	1.5278	2.68849	2.26425	2.09346	2.11818	2.60806	1.92519	1.92914
	2.26415	2.03394	1.88486	2.40544	2.83479	2.08469	2.43744	2.43361	1.90572	1.84793
	2.7423	2.29995	1.91037	2.37696	2.48802	2.11238	2.69459	3.01742	1.59883	1.9797
	2.06471	1.96152	1.8448	1.98748	2.09	1.91642	2.31148	2.42481	1.65057	1.959
	2.45345	2.15945	1.95779	1.99781	2.08056	2.04829	2.58727	3.04872	2.39759	1.9462
	1.97166	2.42119	1.90851	1.97335	2.47659	1.70599	2.03094	2.5901	2.04107	1.61726
	2.02663	1.97144	1.81611	2.02579	2.16248	2.07305	2.83834	2.45192	1.41645	1.9755
	2.04244	1.78335	2.22942	2.36591	2.73258	2.17778	2.25687	2.13159	2.2379	1.79286
	2.0259	1.67369	1.61398	1.86556	3.00857	2.86309	2.46834	2.08851	2.42587	1.68756
	1.97363	2.03553	1.65745	1.6704	2.28375	1.69646	2.26997	2.24096	2.27657	2.31856
	2.92588	1.66232	1.80325	3.00958	2.09233	1.90435	2.0966	2.09009	1.76883	1.64874
	2.25468	1.82771	1.73762	2.06738	2.37505	2.40762	2.40593	2.01204	2.30982	1.70041
	2.02225	2.5822	1.88348	2.41167	3.09435	1.96676	2.95818	2.2196	1.99648	1.90174
	2.52433	1.76158	1.87209	2.06993	2.08144	2.02771	2.35007	2.25208	1.89656	2.10823
	2.27781	2.15803	2.0376	2.36566	2.38947	1.97888	2.12382	2.97738	1.94496	1.67456
	1.98199	2.16711	2.01033	1.65591	2.60065	1.94864	2.48889	2.29453	2.40911	1.97928
	2.11583	1.61865	1.75415	3.20904	2.77143	2.12747	2.16768	2.5348	2.03325	2.05696
	3.55257	1.80279	1.72986	2.18999	2.92195	1.83613	2.91064	1.94336	2.14558	1.96804
	2.1113	1.87014	1.7057	2.25142	3.11023	2.17608	2.10979	2.9235	1.93037	1.83461
	2.24404	2.11796	1.95623	1.59858	2.36318	1.90637	2.70288	2.40347	1.83597	2.16575
	2.61211	1.9394	1.82895	2.78383	2.4977	1.82584	2.09025	2.67754	1.92046	1.72266
	3.10592	1.74679	1.86635	2.40599	2.52229	1.42798	2.02565	2.12367	1.97125	2.22379
	2.09612	2.13714	1.61323	2.29444	2.84044	1.80011	2.16506	2.50857	1.86259	1.76336
	2.5769	1.77395	1.77916	2.22485	2.2935	1.61285	2.12274	2.52345	1.83166	1.76359
	2.67855	1.35159	2.50222	2.16961	2.27463	1.31292	2.18911	2.31699	2.05994	1.92245
	2.34648	2.56182	1.79757	1.7801	2.22442	1.74885	2.76379	2.06188	1.91064	1.79109
	2.14794	2.23271	1.89889	3.28709	2.18506	1.93432	2.12154	2.21873	2.02182	1.79848
	2.10546	1.92839	1.73118	1.8013	2.52084	1.99209	2.49945	2.28193	1.72661	2.17563
	2.29436	1.9282	1.84342	2.477	2.11196	2.40869	2.16989	2.02937	2.16686	1.64259
	3.36042	1.78011	1.84357	1.79177	2.05635	1.96078	2.68434	2.89718	2.14058	1.84904
	2.15808	2.10897	1.82458	1.70488	2.06123	1.9437	2.14026	2.58925	1.696	1.53166
	2.71766	1.97624	1.93405	2.62531	2.88302	2.41024	2.47528	2.39472	2.12658	1.69121
	2.57738	1.90523	1.88054	2.21181	2.66221	1.65524	2.71008	2.09944	2.02982	1.78829
	2.53213	1.68746	1.9837	2.71167	2.62013	1.94541	2.29294	1.98688	1.98737	1.75262
	2.88499	2.19467	1.85667	2.49648	2.55028	1.83775	2.07898	2.96758	2.24783	1.86359
	2.27014	2.20983	1.63606	1.59534	2.39107	1.84359	2.10675	2.71682	1.92121	1.93957
	2.20696	1.48378	2.24507	1.89209	2.29519	1.71217	2.67657	2.55436	1.87247	1.61516
	2.14642	1.85878	2.02564	1.97144	2.04217	1.75758	2.19224	2.87586	2.45625	2.0347
	2.36023	2.33974	2.20639	1.75484	2.99656	1.77075	2.05787	2.56889	1.98271	1.45199
	3.2366	2.13011	1.64501	1.83627	2.45658	2.37279	2.2604	2.06839	2.01836	2.20773
	2.87165	1.91686	2.13969	2.28262	2.16117	1.93423	2.3734	3.03947	2.19003	1.88039
	3.06289	2.17724	2.13603	2.4276	3.02931	1.73093	2.20292	2.23196	1.92713	1.58571
	2.05877	2.54883	2.01047	1.88577	2.65728	1.95554	2.72973	2.58525	2.13134	1.88472
	2.24917	2.65786	1.77588	2.35472	2.65847	1.57704	2.7396	2.28958	1.64157	1.70059
	2.18898	2.14842	1.98173	1.65756	2.24098	1.85679	2.02578	2.11214	1.68826	2.42412
	3.22962	2.74398	1.7186	2.18549	2.82546	1.93324	2.25327	2.2803	1.75476	1.72565
	2.6523	1.80764	1.85301	2.84521	2.1031	1.86275	2.19523	2.13556	1.80456	1.98601
	2.62704	2.14106	1.70676	2.5785	2.67077	2.07635	2.70524	2.68177	2.05938	1.75353
	2.38549	2.15112	2.20823	1.86593	2.15044	1.56499	2.15299	2.03138	1.76041	1.95019
	2.1081	2.02434	1.8454	2.24873	3.07842	1.73723	2.65693	2.27394	1.82934	1.83232
	2.08418	2.52558	1.81522	2.4182	2.10623	1.84602	2.11277	2.2001	1.73881	1.91346
	2.05788	2.02153	1.6243	2.26372	2.08712	1.65435	2.18105	2.11605	1.78259	1.71893
	2.19749	1.71704	1.67718	2.6457	2.58613	1.84965	3.08915	2.13722	1.82764	2.16396
	2.08735	2.93565	1.50684	2.72601	2.82055	1.92062	2.10261	2.65173	1.90226	1.52502
	3.62728	1.46874	1.6733	1.83618	2.5242	1.56489	2.40797	2.11187	1.64264	1.66595
	2.2464	2.13393	1.66489	2.10559	2.15036	1.89612	2.09869	2.32371	1.89773	1.89535
	2.03357	1.97544	1.60689	1.96709	2.08242	1.85356	2.34946	2.23	1.56078	1.8365
	2.13118	2.17623	1.56304	2.53374	2.15198	1.97801	2.1844	2.13001	1.67549	1.8636
	2.10656	1.89199	1.94087	1.918	2.28712	1.6579	2.12692	2.66615	1.7363	1.71277
	2.54887	2.22671	1.6871	2.51861	2.0628	1.55714	2.17854	2.22512	2.15938	2.45599
	2.06151	1.96972	2.0293	1.87595	2.1556	1.726	2.12408	2.15016	2.01829	1.65868
	2.17417	2.10864	1.88044	2.0216	2.18757	2.0993	2.18281	2.90775	1.91609	2.07852
	2.32017	2.03015	1.80715	1.93637	2.28401	1.61643	2.42824	1.94592	2.04362	2.0405
	2.07857	2.31197	1.6953	1.85528	1.97498	1.77885	3.06209	2.53377	1.73916	1.85315
	2.1538	2.20517	1.97395	3.79451	2.65865	1.90958	2.0486	2.10328	1.67998	1.79626
	2.0896	2.20887	2.09031	1.83222	2.71093	1.54057	2.20175	2.56278	2.0539	1.82058
	2.13919	2.14725	1.89303	2.23395	2.8853	1.79869	2.62543	2.26859	1.80574	1.9606
	2.69057	2.11005	2.25083	1.81228	2.01928	2.30214	2.5554	2.27147	1.82215	1.74991
	2.10423	2.20953	1.85018	1.7811	1.97374	1.78528	2.52639	2.55265	1.7974	1.97006
	2.12461	2.0736	2.22407	1.96799	2.6826	1.6769	2.35484	2.39053	1.98492	1.53989
	2.05697	1.79279	1.90792	1.94944	2.18912	1.96148	3.05001	2.96553	1.98322	1.85203
	2.06523	2.17836	1.67104	2.31867	2.09017	1.74964	2.91382	2.19842	1.97509	1.53776
	2.78201	1.90047	1.71099	2.33088	2.16536	2.15207	2.13088	2.16633	1.69856	2.1954
	2.30114	1.92947	1.63069	1.54386	2.46981	1.8735	2.63772	2.8728	1.75595	1.82976
	2.0126	1.70603	1.72126	1.97129	2.02965	1.5895	2.5011	2.46457	2.01778	2.03756
	2.25881	1.8842	1.81987	1.69523	2.3906	2.11494	2.44921	2.85686	1.87706	1.85493
	2.24004	1.82519	1.94591	2.24655	2.20545	1.83546	2.42027	2.20505	2.06809	1.62634
	2.19342	1.87356	1.81743	2.09611	2.40513	1.66977	2.12335	2.40129	2.27612	1.78413
	2.15603	1.86577	1.89732	2.04445	1.89166	2.17264	2.56818	2.13876	1.71873	1.95469
	2.25477	2.05628	1.89377	2.14095	2.75269	1.78868	2.33906	2.60822	1.8703	1.76619
	2.0749	2.82852	1.59547	2.14993	2.13069	1.89133	2.08402	2.6863	2.00994	1.91507
	2.06257	2.33408	1.92035	2.08759	2.12416	1.69833	2.34507	2.14423	1.84076	1.96811
	2.97573	1.68171	1.65595	1.73495	2.04884	1.68133	2.15367	2.42023	1.88145	1.59222
	2.00887	1.81259	1.97163	2.07131	2.10558	1.82783	2.46928	2.10263	1.76183	2.04086
	2.177	2.44489	1.78588	2.37498	2.19086	2.07998	2.05571	2.50914	1.7349	1.90015
	2.15435	2.18499	1.71551	2.25295	2.00334	1.9143	2.13762	2.3668	1.87268	1.72155
	2.38962	2.66751	1.83945	1.71819	2.0614	1.92546	2.09595	2.15033	1.69789	2.0837
	2.18231	2.04477	1.90849	1.72155	2.42411	1.88226	2.52292	3.24018	1.85099	1.81014
	2.17821	1.67345	1.72699	2.2401	2.066	1.84367	2.13742	2.10709	1.65314	1.86894
	2.08248	2.70457	1.89535	1.79669	2.47246	1.94273	2.47769	2.56116	1.88098	1.88848
	2.19223	1.94566	1.70494	2.03963	2.22143	2.36742	2.42337	2.2051	1.94082	1.81207
	2.13862	1.83108	1.67363	2.38611	2.58213	1.81653	2.11038	2.97332	1.92387	1.63452
	2.02906	1.87176	1.74527	2.13395	1.94946	1.68987	2.84	2.00739	1.87528	1.72634
	2.10075	1.87241	2.14342	1.85684	2.20743	2.28682	2.34163	2.11119	1.70527	1.87185
	2.3174	2.56524	1.82529	2.93991	2.68438	2.27206	2.99422	2.1675	1.48683	1.62166
	2.11844	2.46692	1.83778	1.88947	2.15461	1.80263	2.21106	2.05221	1.74427	1.8105
	2.31979	2.51478	1.88456	1.97958	2.35242	1.8881	2.07999	2.36142	1.71557	1.83977
	2.66695	2.13775	1.77076	1.51444	2.425	2.0882	2.21217	2.43687	1.46337	1.55148
	2.10418	1.77173	1.82144	2.41013	2.11475	1.81029	2.14324	2.72101	1.96495	1.89576
	2.30893	1.96585	1.6724	2.44167	2.22545	1.79785	2.05519	2.02055	1.69888	1.804
	2.15044	1.99986	1.74605	1.53307	2.19332	2.26212	2.6492	1.97127	1.92906	1.73856
	2.12193	1.94378	1.68028	2.52795	2.62864	1.57762	2.06418	2.23166	1.88661	1.9969
	2.22771	1.78057	1.62445	2.14872	2.2652	2.34574	2.21173	2.06914	2.07335	1.60671
	3.17323	2.54319	1.64726	2.09068	2.32971	1.77582	2.48152	2.45166	1.95407	1.97844
	2.27348	2.27611	1.82235	1.87173	2.14276	1.64554	2.70983	2.11166	1.84155	1.8913
	2.17812	2.19638	1.74777	2.63604	2.42062	1.67815	2.43347	2.0233	1.65102	1.86852
	2.19148	1.93236	1.66034	1.76046	2.63168	2.2166	2.21105	2.32337	1.72487	1.87924
	2.149	1.9191	1.67453	2.15494	2.55503	1.76843	2.46272	2.15634	2.22252	1.75298
	2.1169	1.93974	1.69466	1.43317	1.96428	2.03595	2.68669	2.32744	1.96311	1.6591
	2.4083	2.11368	1.7655	1.41071	2.25562	1.63406	2.35123	2.95529	1.82899	2.09479
	2.32316	2.22772	1.7634	2.36101	2.14369	1.57835	2.55058	2.0646	1.9069	1.64243
	2.25521	2.43117	1.86433	2.19367	2.29089	1.96982	2.8715	2.17205	1.94271	2.03297
	2.1069	2.01796	1.89803	2.37279	1.98766	1.52983	2.61747	2.74303	2.11166	1.70458
	2.09068	2.19477	2.04606	1.728	2.22405	2.31087	2.37675	2.46626	1.62115	1.99239
	2.12059	2.28743	1.80712	2.42733	2.62804	1.86475	2.60674	2.08812	1.94235	1.56209
	2.34834	2.05928	1.94111	1.56948	2.11522	1.83202	2.32759	2.07799	1.92002	1.63911
	2.32371	1.45539	1.59993	2.00438	2.12701	1.83067	2.43761	2.1443	1.95129	1.44936
	2.14174	1.95745	1.96523	2.40627	2.11047	1.93095	2.25563	1.98395	2.08011	1.82376
	3.10047	1.55085	2.23037	2.37402	2.7437	1.74919	2.83003	3.09647	1.63299	1.94204
	2.2609	1.61426	1.58069	2.23565	2.10683	1.81202	2.09684	2.03961	1.79749	1.84839
	2.58714	2.32502	1.83972	2.25611	2.11122	2.01405	2.12756	2.02337	1.74974	1.5955
	2.24074	1.64872	1.55	1.68127	2.49413	1.57258	2.01338	2.09837	1.7154	1.79261
	2.56082	1.93182	2.18161	2.60834	2.44477	2.13862	2.131	2.04447	2.29344	2.00404
	2.16431	2.07333	1.72648	2.10721	1.99275	1.58157	2.13959	2.25953	1.72123	1.69169
	2.35485	2.13601	2.04553	2.04721	2.03378	1.53052	2.63688	2.1582	2.24271	1.53633
	2.15845	1.79536	1.71654	2.65911	2.18478	1.87654	2.54732	1.9748	1.80891	1.80736
	2.13211	2.03769	1.63377	2.01742	2.96291	2.03025	2.1412	2.00133	1.95788	1.6998
	2.13808	1.91269	1.98984	1.80427	3.24828	1.59625	2.89396	2.5216	1.78134	1.41622
	2.17662	2.27804	1.91759	1.51991	2.2254	1.76587	2.37291	2.70755	1.74893	1.9251
	2.20713	1.85524	1.83824	2.35356	2.10182	1.77621	2.08109	2.08021	1.79788	1.95487
	3.52985	2.46469	1.5782	1.75249	2.47003	1.57485	2.67928	2.44205	1.89109	1.73446
	2.97973	2.45896	2.26523	1.76426	2.14775	1.65359	2.14447	2.62474	1.80194	1.58945
	2.74969	2.04071	2.01301	2.2463	2.09581	1.8016	2.0935	1.97958	1.76349	1.70244
	2.20877	2.04491	1.82831	1.87464	2.75109	2.06441	2.46251	1.98264	2.43199	1.56348
	2.18465	2.42529	1.57167	2.17965	3.254	1.67882	3.00776	2.1127	2.13982	1.99999
	2.45673	1.64064	2.50703	2.45902	2.84169	2.10043	2.06112	2.10132	1.57944	1.56181
	2.75267	2.13368	1.92966	1.94645	2.03923	1.85937	2.69371	2.5787	1.90819	1.58942
	2.8032	1.68844	1.85041	3.35246	3.20855	1.86578	2.9143	2.27365	2.27149	1.68258
	2.16234	1.46155	1.53483	2.32416	2.41761	1.6811	2.04982	2.09177	2.08672	2.33655
	2.12483	2.462	2.13127	2.58462	2.18152	1.9271	2.05365	2.47252	1.93969	1.64166
	2.20683	2.08419	1.74262	2.9238	2.46658	2.14775	2.81961	2.03566	1.93793	1.90986
	2.41708	2.37594	1.96016	2.15392	2.32101	2.01386	2.44186	2.16798	2.24948	1.81107
	2.19867	1.94777	1.46829	2.56683	2.88415	1.66807	2.8276	2.76086	1.95357	1.651
	2.14723	2.11539	1.78056	2.49862	2.45412	2.83042	2.39788	2.11214	2.16846	2.21095
	2.19591	2.00248	1.81451	1.90887	2.4038	1.60886	2.41201	2.06187	2.4875	1.58967
	2.65688	1.68581	1.82222	1.67805	3.10719	1.75092	2.42802	2.09438	2.10432	1.89553
	2.24182	1.82828	1.58224	2.77262	2.16412	2.65808	2.59963	2.58382	1.90762	2.19323
	2.21393	2.58167	1.61309	1.6879	2.95095	1.91142	2.63502	2.09044	1.99096	2.12004
	3.16759	2.13777	1.80662	2.6388	3.06496	1.75641	2.80392	2.10415	1.59971	1.95389
	3.37046	2.27209	1.7363	1.97968	2.40495	1.78654	3.17825	2.01968	1.6891	2.11555
	2.84344	2.21623	1.78879	2.00687	2.0285	2.29984	2.01978	2.07922	2.11884	1.94799
	2.35916	2.21158	1.82953	1.9574	2.13778	1.66968	2.1637	2.81436	1.9296	1.8314
	2.21319	2.4294	1.68909	2.45007	2.1391	2.42204	2.67	2.52677	1.96711	1.98412
	3.45185	1.96143	1.74495	2.23946	2.33302	1.95478	2.53825	2.05727	1.80643	1.98278
	2.29453	1.89473	1.84643	1.70384	2.11086	1.59411	2.62292	1.96517	1.7978	1.89956
	2.35858	2.18746	1.66568	2.19911	2.47198	1.44801	2.01473	2.22249	1.72275	1.83511
	2.41025	1.94357	1.72379	2.91118	1.86689	1.80647	2.23694	1.97497	1.63416	1.67995
	2.47507	1.85903	1.66847	1.93765	2.03449	1.73182	2.26264	2.76123	1.82912	1.75521
	3.01282	2.08681	1.5506	2.72201	2.08969	1.85629	2.25034	2.85399	1.96542	1.68515
	2.16	2.18357	1.76501	2.0279	2.07302	1.49862	2.24105	2.26903	2.19589	1.80755
	2.23764	2.13104	1.81079	2.1325	2.13693	2.10832	2.78618	2.42539	1.94279	1.96495
	2.2232	1.91491	1.79806	2.1194	2.04544	1.5865	2.35672	2.64406	2.03463	1.85817
	2.19912	2.3176	1.76826	1.94162	2.19763	1.62873	2.0771	2.46051	2.05542	1.89459
	3.4255	2.50626	1.58758	1.5997	2.04862	1.87997	2.54738	2.63871	1.97523	1.85444
	2.90984	1.91623	2.53921	2.24972	2.0143	1.72145	2.5515	2.32006	1.67816	2.31235
	2.15035	2.00635	1.57847	2.48112	1.91042	2.07567	2.41439	2.35737	1.88417	1.72222
	2.89682	2.49431	1.7199	2.48707	2.06056	1.82034	2.15042	3.04745	2.14956	2.05825
	2.08806	2.11358	2.38683	2.18284	3.08708	1.76045	2.39132	1.99991	1.70613	2.13584
	2.93643	1.77094	1.79967	2.28006	2.34235	1.99622	2.22414	2.75163	2.01478	1.59838
	3.12135	1.97055	1.97271	2.2681	2.33376	1.6776	2.13783	2.86548	2.04813	2.32893
	2.77126	1.48624	2.02752	2.44993	2.87875	1.61738	2.13049	2.79146	2.46423	1.88249
	2.77053	2.12135	1.84743	1.96595	2.11116	2.08941	2.86828	2.80671	2.09914	2.10287
	2.26729	1.74084	1.86387	1.5999	2.66568	1.78831	2.39604	2.13938	2.15497	2.00755
	2.34432	1.9547	1.6725	2.2022	2.54013	1.84097	2.76224	1.99248	2.35107	1.7147
	2.05239	2.19536	1.7765	2.32481	2.73009	1.76984	2.36886	2.41612	1.56084	1.81761
	2.68423	2.30311	1.80211	2.15097	2.6351	1.39137	2.61107	2.80781	2.06136	2.21957
	2.23149	1.7419	1.6701	2.17535	2.84524	1.74714	2.13001	2.31039	2.18276	2.10583
	2.23784	1.77775	1.75257	1.75698	2.66361	1.81508	2.1219	2.05923	1.78789	2.06893
	2.46825	2.16879	1.64377	1.85778	2.64376	2.01592	2.12781	2.38078	2.26375	2.04187
	2.97483	2.41262	2.03423	1.87416	2.86162	1.72086	2.58356	2.12565	2.17148	2.38901
	2.20344	1.71379	2.02138	1.91424	2.70602	1.71538	2.42787	2.14159	1.93918	1.91794
	2.13147	2.11162	1.79126	2.09735	2.43014	1.62285	2.21354	2.2014	1.63309	2.0638
	2.21253	1.82943	2.03686	1.73896	2.51883	1.73534	3.00163	2.09208	1.66823	2.50611
	2.52038	2.26662	1.77079	1.92817	2.91195	1.83977	2.70038	2.27368	1.83542	2.14399
	3.06095	2.34289	1.99006	2.3645	2.67391	1.75969	2.22429	2.11703	2.22252	2.40288
	2.19675	1.91826	1.82527	2.13884	2.76327	1.52374	2.43138	2.02008	2.1624	1.9727
	2.14125	2.08187	1.49127	1.83395	2.25066	1.51896	2.95357	2.7042	1.60462	1.63359
	2.05776	1.85264	1.65443	2.38419	2.68313	1.81496	2.14889	2.58724	2.15224	2.36463
	2.12621	2.13448	1.53891	1.6908	2.64603	1.6636	2.50982	2.1348	2.15091	2.53821
	2.19642	1.90432	1.57164	1.59163	2.14408	1.57934	2.14182	2.30214	1.88474	2.34429
	2.12878	2.64307	1.90607	2.02561	2.80193	1.92618	3.5552	2.12571	2.18096	1.79925
	2.95974	2.1768	1.72963	2.11073	2.23499	1.87179	2.44306	2.15659	1.97791	2.28682
	2.17202	2.08742	1.78697	2.08452	2.48421	2.11956	2.72715	2.6396	1.87	2.35383
	2.1416	1.86275	1.60581	1.92231	2.57239	1.35503	1.94194	2.48755	2.40345	1.82157
	2.08294	1.90956	1.77327	2.00299	2.39472	1.88849	2.90404	2.83761	1.73332	1.97163
	2.11677	1.90959	1.62987	2.53198	2.3754	1.82957	2.81936	2.49413	1.963	1.86847
	2.09874	1.77642	2.63138	1.62997	2.67635	1.99403	2.46652	2.18511	2.16674	1.86721
	2.79319	1.76952	1.76286	2.08684	2.53641	2.11895	1.94395	2.08682	1.79379	2.37571
	2.0674	1.69082	1.70858	2.2701	2.12255	1.42022	1.99577	2.11295	1.89917	2.03869
	2.09878	1.72961	1.60235	2.02443	2.12414	1.89791	2.10413	2.05589	1.96885	1.58801
	2.16235	1.42549	1.6304	2.87166	2.10082	1.42066	2.88245	3.08951	2.00197	2.31012
	2.51621	2.14193	1.87604	2.81874	2.13843	1.37537	2.765	2.60629	1.71254	1.63242
	2.3752	1.67905	1.83312	2.17378	2.65099	2.14981	2.11188	2.79025	2.0169	1.8747
	2.4456	1.63592	1.74981	2.01304	2.1995	1.62816	2.50422	2.51191	1.72358	1.9267
	2.06966	1.80681	1.63822	1.92119	3.12257	2.45345	2.18957	2.89061	2.16615	1.92834
	2.14098	1.72497	1.55096	2.00678	2.12519	1.6588	2.60315	2.47346	1.95788	1.6886
	2.09107	1.94432	1.40389	1.95037	3.05231	2.01692	2.20991	3.05992	1.88767	1.62698
	2.27294	2.06874	1.54366	1.637	2.5968	1.535	2.28755	2.65569	2.21823	1.91979
	2.08305	1.45864	1.44958	2.24768	2.1515	1.41694	2.06513	2.21936	1.6424	1.80281
	2.23333	1.66649	1.79324	1.61766	2.52914	1.89776	2.4367	2.41862	2.04431	2.33325
	2.56396	1.89553	2.19419	2.26424	2.18775	2.10472	2.16447	2.50309	1.95447	1.7711
	2.08185	1.60954	1.56261	1.70849	2.55548	1.92702	2.87914	2.32244	2.07565	1.7739
	2.13944	1.88081	1.79498	2.13328	3.47558	1.77227	2.70611	2.39522	1.97258	1.76026
	3.29769	1.97453	1.78601	2.09361	2.1279	1.70121	2.68223	2.27761	1.95233	1.92341
	2.41577	2.02891	1.4522	1.96282	2.83797	2.23749	2.18553	2.7604	1.62744	1.63035
	2.20044	1.7231	1.75967	1.72711	2.83643	2.21957	2.37153	2.71908	1.72699	1.60851
	2.10742	2.034	1.71149	1.98009	2.57886	1.76516	2.35555	2.26543	1.88733	1.60939
	4.05956	2.07612	1.63611	2.1253	2.6826	2.21786	2.08463	2.21368	2.0057	1.72884
	2.12176	1.77496	1.69011	2.03474	3.17382	1.72612	2.20575	2.58042	2.15195	1.73462
	2.16516	1.63023	1.63129	1.90057	2.22139	1.95126	2.19198	2.41171	1.54781	1.8604
	2.24885	1.57138	1.91392	2.21318	2.40314	1.86776	2.3564	2.14162	1.48274	1.71224
	2.85517	1.44352	1.72925	2.5143	2.1072	1.93765	2.77126	2.06657	1.73974	1.99274
	2.81442	2.0544	1.88605	2.09048	2.77786	1.90962	2.1111	3.10219	2.08026	1.66647
	2.93512	1.74184	1.7257	1.63162	2.20671	1.52266	2.40404	2.7506	1.94321	1.70956
	2.77442	1.80243	1.70401	2.51914	2.22308	1.66242	2.54437	2.20212	1.82739	1.75384
	2.60965	2.44491	1.8079	2.04278	3.22167	1.94361	2.52343	2.56167	1.89572	1.91411
	2.80273	2.12279	1.606	1.84521	2.55468	1.83888	2.5782	2.48244	1.55496	2.04227
	2.45033	1.46311	1.67311	1.80987	3.285	1.68877	2.14509	2.33352	1.93331	1.85913
	2.68632	1.81994	1.98066	2.50034	2.18673	2.01856	2.67302	2.28923	1.743	1.67437
	2.6283	1.36085	1.7409	2.19564	2.56591	2.11313	2.60458	2.21727	2.09675	1.85452
	2.25723	1.9705	1.51637	2.09489	2.29878	1.73507	2.41124	2.06086	1.88466	1.93335
	2.99801	2.34072	1.43682	2.25983	2.46272	2.05917	2.27481	2.25412	1.82286	1.88484
	2.65209	1.9223	1.8352	2.00581	3.12318	1.8087	2.69121	2.51841	2.11054	1.79508
	3.06127	1.70912	1.67408	2.43751	2.626	1.90275	2.573	2.22003	1.85469	1.91869
	2.51187	1.8351	1.49595	1.83093	2.37344	2.06657	2.37034	1.99069	2.45928	1.92117
	3.0987	1.41835	1.76334	2.3644	2.46622	1.7348	2.52594	2.33714	2.04243	1.54491
	3.05928	1.98036	1.88261	2.09879	2.68682	1.70417	2.10468	2.00646	1.72543	1.82308
	2.37359	2.03259	1.44255	2.40342	2.40593	1.52449	2.74335	2.08752	1.71314	1.93839
	2.02358	1.94129	1.71044	2.20344	2.1829	1.71389	2.23782	2.94157	1.79894	1.76959
	2.04941	2.12253	1.42578	2.0763	2.28015	1.91679	3.31564	2.42164	1.85806	1.89545
	2.87131	1.91616	1.80575	2.60912	2.51431	1.91762	2.7015	2.79915	1.79604	1.95529
	2.70635	2.03672	1.53748	2.3227	2.17479	2.75772	2.87357	2.29541	2.02145	1.86484
	2.16158	2.36223	1.33787	2.70876	2.74887	1.74309	2.86966	2.3925	2.00658	1.77207
	3.17818	1.48467	1.88206	1.9527	2.79734	1.70319	2.32618	2.3991	2.29599	1.82624
	2.1016	2.1425	1.7724	1.8449	3.03406	1.79295	2.54938	2.11125	1.73853	1.84458
	2.93783	1.66043	1.73861	2.73573	2.78033	1.79762	2.46673	2.066	1.97479	1.90079
	2.13544	1.65906	1.54862	1.70505	2.21792	1.83373	2.26925	2.8625	1.88145	1.81738
	2.09311	1.88777	1.77852	2.43248	2.9353	1.77458	3.17972	2.58699	2.18835	1.87973
	2.46764	1.97574	1.50211	2.15658	2.13131	1.97277	2.10679	2.9453	1.94525	1.63828
	2.28765	1.89942	1.63932	2.81625	2.86944	1.85518	2.14408	2.07722	2.07564	2.62097
	2.39709	1.73967	1.65942	1.89411	2.22592	1.79348	2.13997	2.29284	1.42831	1.74566
	3.46672	1.37407	2.48988	1.53197	2.5135	1.95385	2.54341	2.34022	1.8745	2.21407
	2.02831	2.29538	1.40599	1.56789	2.40264	1.71474	2.16987	2.77944	1.90455	1.73586
	2.07305	2.54022	1.83085	1.62593	2.7019	1.76328	2.58994	2.86534	1.60574	1.84824
	2.08305	1.97543	1.69782	1.5163	2.22472	1.68111	2.79956	2.44108	2.07387	1.61655
	2.48897	2.36083	1.59716	1.94112	2.32658	1.77568	2.36197	1.9769	1.96303	1.97373
	2.62477	2.21028	1.71913	1.9322	2.68894	2.07632	2.32512	3.42306	1.71688	1.83305
	2.11757	2.0927	1.76328	1.81727	3.25408	1.78605	2.2446	2.64169	1.85752	1.86974
	2.41108	1.74341	1.95359	2.14147	2.4262	1.70213	2.3123	2.27286	2.03484	1.92089
	2.17853	1.79959	1.82697	2.04952	2.60546	2.0528	2.54878	2.56456	2.01214	2.13228
	2.58488	1.76608	1.71526	2.24438	2.27145	1.91104	2.92236	2.42876	1.85907	1.69861
	2.99216	2.19622	1.43314	1.55169	2.12278	1.85872	2.33124	2.07806	1.75262	2.00475
	2.11487	1.65155	1.59655	2.30909	2.86237	1.76084	2.66683	3.1628	2.25591	1.83335
	2.15159	1.63184	1.60233	2.00952	2.94577	1.99337	2.17587	3.04449	2.02561	2.0498
	2.59349	1.48383	1.70823	1.48745	2.97929	1.7616	2.18641	2.85048	1.65372	1.8256
	3.08239	1.77311	1.58227	1.84722	2.14237	1.66462	2.67914	2.46313	1.59806	1.87197
	2.9252	1.70683	1.67622	1.96307	2.55319	1.84454	3.18717	2.20282	1.95299	1.93038
	2.13884	2.22791	1.64853	1.92101	2.31805	1.80335	2.21298	2.508	1.71436	1.79407
	3.2536	1.6308	1.70948	2.30953	2.64447	2.29816	2.61474	2.81845	1.60917	1.59167
	2.04202	1.6906	1.83533	1.57162	2.29027	2.03838	2.10589	2.04585	1.90935	1.74064
	2.30154	2.21063	1.728	1.82085	2.9235	2.04803	2.84763	2.07872	1.7124	2.1042
	2.26746	2.41284	1.83105	2.53388	2.29113	2.27752	3.23793	2.48136	1.87478	2.31046
	2.14486	1.59418	1.64427	2.15485	2.12943	1.80498	2.5013	2.82372	1.89751	2.24222
	2.01701	2.06689	2.05003	2.06816	2.183	1.65381	2.60833	2.9651	2.18912	1.85655
	2.71484	1.52718	2.00766	2.34554	2.21861	1.73293	2.69346	2.07791	1.94551	1.7037
	1.99205	1.95381	1.73168	1.88472	2.30058	1.63071	2.07496	2.28855	2.30563	1.75002
	2.26481	2.22004	1.83382	2.35795	2.77386	1.87379	2.59897	2.09541	1.9681	1.74337
	2.09197	1.55179	1.55914	1.80434	2.12512	1.82482	2.23492	2.24061	1.80921	1.40949
	2.16841	1.82037	1.75303	2.09135	2.20398	1.61571	2.69166	1.91491	1.88762	1.63942
	2.05468	2.22112	1.67276	2.34587	2.06453	1.71627	2.36637	3.27722	2.11692	2.20356
	2.22712	1.40242	1.52488	2.77981	2.69824	1.86569	2.38116	2.04076	1.80715	1.6833
	2.9001	2.01404	1.68215	2.05396	2.17004	1.72892	2.44011	2.19885	1.71829	1.79151
	2.44034	2.03605	1.47777	2.35654	2.40249	2.40164	2.15692	2.44537	2.14475	1.88719
	2.7404	2.03005	1.96073	2.65665	2.48503	1.76921	2.5272	2.28312	1.94943	1.76253
	2.13818	1.83895	1.63626	1.7661	2.3803	2.10248	2.34066	2.44088	1.74143	1.69901
	2.24487	1.53476	1.53796	1.93202	3.12702	1.86316	2.6303	2.78077	2.00376	1.97651
	2.09035	2.02267	1.40246	2.20781	3.06936	1.94007	2.56861	2.97366	2.03314	1.82446
	2.69414	2.03179	1.71317	1.89868	2.94365	1.91873	2.38284	2.51926	1.82999	1.71707
	3.11088	1.94154	2.00853	1.59306	2.62979	1.79417	2.2282	2.63306	1.78486	1.82348
	2.47588	2.08009	1.63543	1.53125	2.88053	2.01686	2.69972	2.01669	1.7987	2.0627
	2.85755	2.15735	2.01946	2.28716	2.56614	1.72393	2.34785	2.51756	1.8119	1.80493
	3.04597	1.99354	2.12405	2.33553	2.46788	1.81335	2.9406	3.04512	1.73848	2.10032
	2.11443	2.14443	1.95181	2.26444	2.24745	1.81468	2.31327	2.03523	1.62027	1.70531
	2.29743	1.91572	1.59214	2.14646	2.43378	2.05696	2.64035	2.45538	1.78025	1.71874
	2.30806	1.96728	1.62593	2.36586	2.5096	1.29021	2.75025	2.12228	2.00438	2.2151
	2.67349	2.37039	1.78748	2.4876	2.6921	2.2481	2.41063	2.78721	1.80898	1.91333
	2.02413	2.31193	1.88754	2.16578	2.61506	1.35783	2.37965	2.77693	1.77482	1.56788
	2.12181	1.84555	1.31411	2.97793	2.75927	1.40627	2.44585	2.04039	1.85883	1.58804
	2.31192	1.91751	1.62434	2.12121	2.48587	1.83938	2.30238	2.42167	2.09079	2.05531
	2.76914	2.39473	1.80018	1.58479	2.65102	1.79127	2.23596	2.55965	1.66898	1.82719
	2.76874	2.29569	1.55289	2.99569	2.16032	1.82025	2.81643	2.40972	2.16966	1.66131
	3.77759	2.24933	1.60549	2.55464	2.77184	1.78892	2.65629	2.49858	1.75905	1.76128
	2.10171	1.89006	1.94039	1.9143	2.1384	1.78294	2.51	2.48326	1.82266	1.68463
	3.20958	1.87143	1.4988	2.20546	2.68438	1.5869	2.42423	2.17064	1.91228	2.14868
	2.35185	2.09879	1.21305	1.60092	2.85763	1.88419	2.79618	2.61992	1.93345	1.52867
	2.42757	1.84821	1.8523	1.99938	2.802	1.59058	2.64678	2.05138	1.71912	1.83059
	2.45388	2.04086	1.41179	2.16035	2.08544	2.05133	3.20939	2.11667	1.73116	1.90173
	2.16299	1.9825	1.40933	2.19558	3.01523	1.82988	2.196	2.39748	1.87755	1.72076
	2.50942	2.00717	1.54679	2.17641	2.60075	1.82664	2.16471	2.41379	1.54272	1.59644
	3.3888	2.26201	1.63331	2.37793	2.58664	1.51936	2.53578	2.40881	1.63151	1.61156
	2.26977	2.10985	1.63354	2.2629	2.45146	1.93973	2.51804	2.27596	1.78351	1.94006
	2.13984	2.25218	1.69481	2.77413	2.33694	1.89821	2.08431	2.07723	1.8267	2.13022
	2.46819	2.28842	2.09416	2.43677	3.1351	1.90737	2.59976	2.84261	1.861	1.63001
	2.46163	1.82353	1.78546	2.13177	3.30769	1.66354	2.6802	2.57828	1.78367	1.59206
	3.65011	2.10973	1.19937	2.60026	3.26371	1.82123	2.84253	2.17103	1.91574	1.86924
	2.15579	1.83542	1.45509	2.01883	2.23678	1.68692	2.62561	2.50869	1.71766	1.69192
	2.06636	1.90581	1.82259	1.81529	2.41815	1.96129	2.46941	2.0431	2.05002	2.09296
	2.13817	1.89511	1.93989	2.48968	2.26614	1.7737	2.55943	2.29263	1.60698	1.83022
	3.26139	1.75901	1.72343	1.92537	2.88983	1.9814	2.45967	2.07608	1.81022	1.55279
	2.27281	1.99962	1.9878	2.63652	3.14929	1.81336	2.33263	2.26581	1.50819	2.05897
	2.16331	1.95342	1.88504	1.54203	2.06501	1.81124	2.39011	2.0051	1.9877	1.59506
	2.23034	2.53544	1.34703	1.9881	2.76021	2.00474	2.38662	1.95305	1.71768	1.83815
	2.8402	1.84247	1.52994	2.03889	3.25584	1.71652	2.70253	2.18532	2.70633	1.54739
	2.08224	1.9007	1.88454	1.70905	2.701	1.66751	2.61906	2.04985	1.56461	1.70855
	2.13794	1.92807	1.46399	2.02598	2.14261	1.82949	3.01039	2.93409	2.00646	1.9019
	3.59023	1.96268	1.61804	2.0441	2.69591	1.9819	2.14857	1.83864	1.57826	1.84278
	3.3935	1.91524	1.96308	2.30462	2.50807	1.97056	2.49132	2.4985	1.70476	1.79659
	3.03691	1.95032	1.55431	2.63392	2.7185	1.78901	2.80553	2.02696	1.54971	1.87258
	3.37856	1.93935	1.56028	1.80691	2.36106	1.67103	2.50306	2.01238	1.51418	1.79025
	2.36772	2.18235	1.54455	1.60575	2.26065	2.06393	2.61729	2.11949	1.54792	1.74893
	3.21696	1.90066	1.84774	1.72842	2.12216	1.93628	2.34219	2.19191	1.9082	1.54235
	2.52874	2.03189	1.56556	2.16948	2.41291	1.94643	2.8708	2.12391	1.59848	1.91618
	2.46311	2.13414	1.70924	2.61763	2.37868	1.94286	2.6367	3.32444	1.56486	1.90619
	1.98922	3.23624	1.69098	2.50782	2.03509	1.71279	2.26611	2.43659	1.58167	1.59669
	3.3202	1.92425	1.72307	2.83519	2.21093	1.91517	2.58211	2.18565	1.80981	1.90601
	2.04002	2.04087	1.59175	2.16956	2.15477	1.71813	2.43968	2.0887	1.52381	2.06553
	2.80712	2.26646	1.69717	2.36781	2.83411	1.84307	2.09308	2.02944	1.59443	1.73804
	4.12083	1.86693	1.93577	2.22124	2.16042	1.94756	2.95151	2.15785	1.66159	1.51379
	2.55488	2.31692	1.62021	1.92858	2.01791	2.26845	2.44369	2.07186	1.69608	1.84001
	3.94654	2.37828	1.50893	2.80607	2.83869	1.83277	2.7434	1.96143	1.34534	1.95127
	2.20741	2.41742	1.57318	2.0283	3.15436	1.99981	2.03679	2.18404	1.77597	1.84691
	2.99773	1.84438	1.84574	2.38196	2.3477	1.54507	2.07754	2.50988	1.6725	1.77963
	3.10821	2.177	1.82101	2.05112	2.16958	2.02282	2.3267	2.33702	1.61711	2.47409
	2.86628	2.37149	1.59491	1.96566	2.62055	1.98139	2.47007	2.48424	2.15918	1.80254
	2.05366	2.34087	1.61943	1.85972	2.41367	1.68403	2.5724	1.9471	1.67884	1.8449
	2.27772	1.72273	2.02225	1.61018	3.16016	1.86603	2.29254	3.54554	1.7493	1.59085
	3.31561	1.64512	1.87693	1.86861	2.1424	1.71012	2.16391	2.31454	1.76033	1.80801
	3.10162	2.09133	1.96032	3.11445	2.47021	1.79205	2.75626	2.02976	1.73932	1.8584
	2.36784	1.86461	2.1189	2.2882	2.96678	2.02857	2.09131	2.25533	1.8777	1.75932
	2.35728	2.04933	1.89895	1.98913	2.12267	1.6884	2.3212	2.39378	1.67089	1.49944
	2.62844	2.32328	1.89261	2.30886	2.69982	1.6982	2.06937	2.8651	1.96351	1.70237
	2.20346	2.30399	1.84225	2.17172	2.60188	1.5223	2.18477	2.46062	2.03437	1.81546
	3.05802	2.15878	1.66036	1.8043	2.36853	2.22758	2.10479	2.54065	1.78905	1.61323
	3.22795	1.65959	1.73977	2.03844	2.65243	1.48531	3.25424	1.97516	1.88825	1.70521
	2.11968	2.76593	1.63109	2.73038	2.32761	1.90998	2.64349	1.95401	1.78815	1.73384
	2.84011	1.7018	1.82271	2.10107	2.93195	1.54346	2.46391	2.14185	1.72464	2.12604
	2.32399	2.50451	1.61563	2.13004	2.59262	2.20108	2.30791	2.29935	1.58615	1.83028
	3.34159	1.70502	1.92946	1.76662	2.83894	1.75169	2.40254	2.26518	1.68617	1.74943
	2.18726	2.12914	1.54884	2.05729	2.64722	1.73741	2.21987	2.46907	1.75992	1.93154
	2.78847	1.95482	1.54227	2.16406	2.7137	1.76984	2.07015	2.55505	1.41536	1.65116
	2.28051	1.85264	1.66336	1.99151	2.67307	1.65407	2.13668	2.31096	1.40108	1.74869
	2.76712	1.58169	1.85335	1.93144	2.91326	1.9286	2.0629	1.93607	1.97781	1.77215
	2.52422	2.37801	1.50428	2.17635	2.10424	1.42933	2.32539	2.08967	1.90561	1.8338
	2.26708	2.45183	1.77769	1.99529	2.97318	1.71826	2.09317	1.9301	1.69716	1.94682
	3.07136	2.13869	1.98689	1.81133	2.60251	1.76174	2.32498	2.39738	1.96029	1.71427
	3.00013	2.23619	2.08359	2.16154	2.93961	1.69068	2.08292	2.22563	1.81373	1.88755
	2.68615	2.22217	1.52653	1.56503	2.29284	1.71192	2.10648	2.44701	1.77427	1.97116
	2.06921	1.86466	1.5881	2.50323	2.0644	1.64296	2.06233	2.46428	1.9397	2.02797
	2.10317	2.36402	1.66912	2.13467	2.46296	1.82664	2.41954	2.0768	1.98132	1.61018
	2.65357	2.52472	1.54187	2.10297	2.78205	1.71167	2.06468	2.48906	1.89193	2.10888
	3.10999	1.97091	2.0249	2.30611	2.57334	1.91843	2.46107	2.53856	1.75831	1.84594
	2.81987	2.16845	1.86563	2.56619	1.97378	1.97849	2.32856	2.71461	1.73381	1.79426
	2.94576	2.22052	1.84854	2.22975	3.03771	1.8057	2.5586	2.02621	1.70064	1.72143
	4.11082	2.36197	2.09621	2.20747	2.80189	2.29196	2.38444	2.0169	1.89987	1.71445
	2.06912	1.97715	2.19842	2.30682	2.39257	1.59975	2.73357	3.00593	1.69137	1.77325
	2.5037	2.28871	1.94703	2.26121	2.97122	1.74835	2.98007	2.17003	1.57495	1.94193
	2.46357	2.16499	1.59862	1.83674	2.5963	2.08745	2.25837	2.59975	1.74146	1.91187
	2.63993	1.88318	1.73019	2.51043	2.69037	1.72764	2.08847	2.22102	1.96127	1.88214
	2.13922	2.48725	1.67587	2.66358	3.01112	1.77462	2.45389	1.9919	1.94952	1.75424
	3.2415	2.1759	1.89893	1.97851	2.34045	1.64738	2.07873	2.12451	2.05977	1.88632
	2.90815	2.58936	1.70741	2.14342	3.10721	1.84322	2.00243	2.25301	1.48078	1.79528
	2.21595	2.14136	1.8647	2.21499	3.21496	2.45968	2.05542	2.52019	2.35913	1.65226
	2.74041	2.05355	1.80984	1.98532	2.74067	1.61799	2.1052	2.15662	1.567	1.86142
	2.08619	2.51682	2.04132	2.1799	2.42577	2.08066	2.14743	2.07445	1.89007	1.64941
	2.12422	2.15094	2.14905	1.80428	2.13412	1.6691	2.02467	2.085	1.71686	1.59761
	2.30069	2.73771	1.58756	1.83872	2.8559	1.77415	2.37381	2.33981	1.69066	1.79602
	2.97314	2.21147	1.57719	1.86763	2.80654	1.85997	2.24502	2.27996	1.6787	2.15499
	2.04982	2.16368	1.76515	2.77078	3.08168	1.88016	2.15144	2.45937	1.62685	1.821
	2.18547	2.25246	2.14774	2.88929	2.17791	1.77567	2.07919	1.94103	1.84585	1.81333
	2.11452	1.60923	1.76884	1.78241	3.39446	1.6431	2.32329	2.38488	2.20324	1.66411
	2.69863	2.51214	1.78862	2.22769	2.08091	1.86646	2.33242	2.59174	1.80272	1.77485
	2.05084	2.05545	1.78364	2.3743	2.76061	2.26352	2.08983	1.94273	1.51195	1.58621
	2.10912	2.14374	1.93248	2.40888	2.24408	1.78063	2.87859	2.54005	1.74512	1.96986
	2.16481	1.85869	1.81259	1.90255	3.30219	1.58911	2.69812	1.98271	1.74959	2.14382
	2.05909	1.61317	1.89817	2.18919	2.6401	2.07521	2.4023	1.93664	1.5845	2.20786
	2.09719	1.80134	1.55023	1.97026	2.6849	1.94859	2.09333	2.03067	1.91302	1.74062
	2.06279	1.99818	1.63471	2.40441	3.03724	1.99338	2.09739	2.59267	1.68569	2.08741
	2.11081	1.80367	1.73621	1.89923	2.64155	2.21978	2.6371	1.97124	1.58442	1.68134
	2.02094	2.254	1.65573	2.38654	3.05265	1.67326	2.39262	2.34615	2.24623	1.70396
	2.10567	1.68214	1.63441	2.14699	3.19966	1.74879	2.56753	1.8791	2.05053	1.62726
	1.93316	1.91844	1.89137	2.01673	2.09011	1.92779	2.86338	2.11043	2.00105	1.77491
	2.52872	1.8889	1.92321	2.05966	2.46294	2.11696	2.44207	2.01498	1.70744	1.90222
	2.34991	1.80858	1.6261	2.4798	2.07637	1.76876	2.85017	1.95897	1.72039	1.64382
	2.17241	1.93521	1.93337	2.05674	2.32342	1.78679	2.09376	2.48523	1.87125	1.68392
	2.06417	1.94034	2.06854	1.78571	2.4316	1.6435	2.74315	1.97541	1.73627	1.52462
	2.08534	2.00238	1.74151	2.38306	2.76556	1.6888	2.3509	1.94108	1.84668	1.71363
	2.07543	2.22541	1.8355	2.62868	2.11964	1.79136	2.99281	1.91527	1.95557	1.7524
	2.06693	1.95084	1.7787	1.93268	2.14491	1.74404	2.48088	2.0748	1.99414	1.78738
	2.23697	2.15404	1.90742	3.0494	2.20027	1.75694	2.35207	1.99823	2.29395	1.69585
	2.0395	2.02451	1.99779	2.07737	2.34586	1.64825	2.09421	2.54468	1.6407	1.6166
	2.6167	1.89057	1.48115	2.06833	2.30156	2.42705	2.61726	2.7621	2.04587	1.52262
	2.55437	1.83598	1.7686	1.88601	2.24643	1.40137	2.05692	2.49721	2.01126	1.95218
	2.10328	2.24009	1.60958	1.98848	2.20098	1.94132	1.96975	2.24695	2.38228	1.63971
	2.55034	1.87324	2.11568	1.91926	2.47883	1.6689	1.99104	2.39762	1.93102	1.44355
	3.4897	1.93209	1.66719	2.00066	2.0002	1.70301	2.81503	2.01273	1.82861	1.74703
	3.37732	2.13724	1.90706	1.92304	2.1841	1.63948	2.74648	2.01513	2.15061	1.4373
	1.9927	1.61339	2.52543	1.83384	2.00322	1.78394	2.18402	2.02775	1.85614	1.54606
	2.10128	1.98825	1.62499	1.92635	2.64329	1.92289	2.17137	1.91429	1.85748	1.9954
	2.02316	1.75106	2.23803	2.5077	2.42549	1.64539	2.7892	1.99763	1.90511	1.88854
	2.05477	2.51299	1.44591	2.35182	2.50539	1.59797	2.62155	2.03861	2.39135	1.70509
	2.02916	2.14007	2.08245	2.26499	2.54659	1.61162	2.08877	2.02321	1.94956	2.65131
	2.02188	2.34329	1.74143	2.40581	2.36684	1.91783	2.26486	2.04963	2.02291	1.79644
	2.09555	2.34548	1.40554	1.83564	2.74491	1.70579	2.13787	2.74457	1.68724	1.82843
	2.27859	2.08576	1.81749	1.99996	2.59865	2.00836	2.17119	2.03275	2.00745	1.36039
	2.0489	2.14886	1.55236	2.47717	2.69437	1.96405	2.07386	2.1355	1.73841	1.51093
	1.96893	2.06328	1.44007	2.0848	2.14545	1.74677	1.99166	2.13384	1.85318	1.4687
	2.29802	2.39168	1.56676	2.05252	2.70022	1.74744	2.66716	1.99074	1.66871	2.09054
	2.02922	1.7712	1.59493	2.63648	2.03678	1.79293	2.08746	1.99896	1.615	1.4713
	2.81872	2.07836	1.57942	1.85524	2.12149	1.91003	3.3523	2.15066	1.71562	1.53399
	1.9609	2.08144	2.22103	2.40433	2.45718	1.78967	2.16779	2.04912	1.74012	2.00811
	2.07083	1.74844	1.52576	2.72975	2.499	1.96582	2.31485	2.52552	1.69258	2.38606
	2.05754	2.30371	1.70239	3.18776	2.41522	1.63198	2.49166	2.19635	1.65514	1.97019
	2.1618	2.1899	1.77217	1.83405	2.20351	1.87585	2.75567	1.94148	1.61803	1.60195
	2.00448	2.19807	1.47565	2.51606	2.8162	1.52846	2.08657	2.00098	1.77154	1.89479
	2.64191	2.23563	1.70607	1.9558	2.6846	1.63626	2.6182	2.40413	2.23709	1.48908
	2.46717	2.39047	1.91335	2.15851	2.21857	1.61226	2.41543	2.13588	1.71615	1.8141
	2.11183	2.43494	1.39299	2.01644	2.81479	1.70847	2.07709	2.23625	1.80732	1.59196
	2.84148	2.2117	1.49647	1.91352	2.22418	1.66733	2.36954	2.03707	1.40961	1.6704
	2.00358	2.39146	1.41968	1.83314	2.21775	1.93454	2.66726	2.29272	2.15657	1.47954
	1.98156	1.99106	1.77928	1.88963	2.40849	1.76119	2.103	2.00284	1.95259	1.4422
	2.02386	2.3616	1.6539	1.93105	2.82834	1.85796	2.26588	2.02833	1.42169	1.54461
	2.16012	2.34248	1.56426	2.04732	2.13091	1.69659	2.79901	2.44509	1.63161	1.57029
	2.4664	1.90919	1.7427	2.57384	2.12654	1.69061	2.18809	2.28945	1.63652	2.09773
	2.90078	2.42108	1.51472	1.89935	2.07797	1.95583	2.77036	2.61984	1.92027	1.74173
	2.26111	2.82509	1.62314	1.87584	2.33105	1.91478	3.31955	2.3008	1.81549	1.78014
	2.82949	2.42165	1.82115	1.99737	2.44339	2.02558	2.47136	2.54194	1.38914	1.56142
	2.10015	2.03622	1.66955	1.83279	2.2081	1.4146	2.13209	1.96991	1.83077	1.66451
	2.47687	2.41388	1.68286	2.10072	2.6011	1.85379	2.45466	2.06084	1.73976	2.13913
	2.10578	2.62312	1.96012	2.15599	2.49887	1.63091	2.41933	1.98554	1.75867	1.50495
	2.09426	2.61565	1.65577	2.59844	2.35827	1.54035	2.06031	2.05137	1.93908	1.71788
	2.33541	2.41529	1.56342	2.37345	2.06733	1.39156	2.41395	2.05302	2.06343	1.61294
	3.21736	1.78479	1.90008	2.01162	2.76173	1.99915	2.04621	2.16105	1.75428	1.8366
	3.03551	1.90545	1.57858	2.07114	2.07154	1.88666	2.18611	2.78342	1.71736	1.74851
	2.69345	2.32403	1.53254	2.11283	2.63144	2.10801	2.17451	2.06024	1.92966	1.76172
	2.15465	2.01162	1.6299	2.36852	2.78091	1.73133	2.52964	2.07313	1.71433	1.6061
	2.05404	2.0481	1.79546	2.08081	2.25902	2.12832	2.40155	2.03949	1.56113	1.68716
	2.0467	2.21318	1.64176	2.30731	2.36072	1.68518	2.51313	2.0685	1.90457	1.80908
	2.46692	1.76544	1.61324	2.19807	2.71257	1.67865	2.18016	2.48768	1.62379	1.89151
	2.21237	2.32281	1.61952	2.61751	2.74253	2.00192	2.20962	2.2494	1.99515	2.17453
	2.42803	2.17415	1.96125	1.94595	2.36906	1.94501	2.08336	2.92661	1.61901	2.39454
	2.58555	2.32013	1.65573	2.07876	2.61542	1.77957	2.3854	1.9016	1.92924	1.66191
	2.21729	2.2537	1.56053	2.10996	2.73428	1.87124	2.03569	2.26842	1.49923	1.69544
	2.2986	2.08591	1.8468	2.90124	3.16092	1.87744	2.72427	2.32371	1.78902	1.7305
	2.05563	2.08848	1.73394	1.86982	2.69906	1.58638	2.0352	2.38474	1.81155	1.61423
	2.27609	3.28884	1.71637	1.86823	2.05745	1.83371	2.13967	1.95248	1.70741	1.77674
	2.15513	1.96455	1.69886	1.84473	2.03703	1.35288	2.24783	2.12915	2.19847	1.88258
	2.8799	1.69925	1.93608	2.06359	2.13695	2.19489	2.03971	2.45006	1.61765	1.62474
	2.7561	1.88976	1.88802	2.27429	2.46824	1.80492	2.04547	2.10384	1.78239	1.8506
	2.74019	2.72936	2.04286	2.18512	2.30181	1.96846	2.78248	1.88783	2.25135	1.53289
	3.38566	3.07866	1.64829	2.80732	2.69616	1.95812	2.2723	2.12256	2.02898	1.75412
	2.53027	1.80308	1.51059	2.83822	2.17318	1.65987	2.27965	2.36658	1.71906	1.86864
	3.24078	2.00342	1.7015	2.20643	2.09767	1.63051	2.04892	2.02576	1.85256	2.18857
	3.44183	1.94694	1.74332	1.89976	2.16532	1.83382	2.22888	2.59913	1.88311	2.0019
	2.21873	2.20565	1.58236	2.14225	2.11885	1.93135	2.07146	2.3915	1.556	1.86473
	2.18716	2.37387	1.59971	2.22157	2.83975	2.50301	2.73833	2.22148	2.03751	2.18096
	2.19587	1.97388	1.85677	1.91627	2.14885	1.73742	2.50503	3.01333	1.80277	1.8497
	3.02353	2.01696	2.03894	2.40387	2.15225	1.7827	2.53721	1.98208	1.88683	1.80539
	2.19072	2.20048	2.33542	1.87428	2.05578	1.92023	2.119	2.58055	1.68797	1.72164
	2.46912	1.98201	1.59927	2.25731	2.52334	1.75077	2.26114	1.99479	1.45432	1.92579
	2.11411	2.18865	1.67501	1.86752	2.11802	1.84723	2.07298	2.38366	1.83055	1.64424
	2.13275	1.99196	1.86917	2.02146	2.25361	1.60972	2.67393	2.02781	1.46029	1.90204
	2.23525	2.29134	1.72189	2.6581	2.18008	1.71055	2.21896	2.42903	1.48589	1.84108
	3.17403	2.19429	1.62225	2.4258	2.22173	1.92863	1.94553	2.03744	2.05095	1.64384
	2.32554	2.37534	1.54241	1.8166	2.2334	1.98472	2.45132	2.1902	1.818	1.99571
	2.45841	1.77244	1.60832	1.98602	2.22251	1.8187	2.60213	3.47082	1.69178	1.62321
	2.28182	1.94216	1.86132	2.76694	2.27554	1.46472	2.27797	2.18107	1.8922	1.92036
	2.2142	1.91327	1.84988	2.0743	2.85163	1.95345	2.54627	2.59311	2.01337	1.86719
	2.95686	2.01799	1.52343	1.83732	2.54921	1.54235	2.42501	2.07908	1.90545	1.85119
	2.8744	1.55122	1.72868	1.82449	2.14931	1.65463	2.07498	2.03426	1.68763	1.56907
	2.259	2.17282	1.96872	2.35174	2.17419	1.90337	2.69919	2.08331	1.53417	1.72657
	2.53614	1.96224	1.98731	2.03729	2.75364	1.99993	2.21236	2.09836	1.5629	2.2027
	2.37758	2.09036	1.9656	2.30667	2.24246	1.83728	2.11792	2.00273	1.86911	1.48537
	2.86625	2.62545	1.89033	1.94985	2.69733	1.87383	2.03373	2.02663	1.84309	1.80889
	2.71713	2.59106	1.48338	1.84456	2.09514	2.03564	2.04791	2.17644	1.62756	1.71769
	2.50008	1.98076	1.9046	2.45367	2.74976	1.73893	2.42089	2.00702	1.72759	1.50766
	3.19404	2.22073	1.77443	1.94439	2.17151	1.83507	2.36797	2.12353	1.72503	1.7322
	3.11835	1.50347	1.61352	2.96437	3.01992	2.22653	2.08817	1.98361	1.6874	1.83731
	2.25616	1.95535	1.69091	2.16611	2.74037	2.11605	2.2272	2.07437	1.51508	1.97422
	2.45985	2.22616	1.65293	2.27404	2.3759	1.61469	2.20323	2.17275	1.981	1.91127
	3.27207	1.68623	1.86321	2.19023	2.09252	1.91528	2.92174	2.14622	1.46522	1.7103
	2.32084	2.20782	1.75599	3.15549	2.58425	1.77331	2.22308	2.03866	1.98137	1.92861
	3.43102	1.60123	1.60771	1.99013	2.55521	1.67856	2.51331	2.24384	1.65843	1.51529
	2.29356	1.81779	1.5735	1.84981	2.2682	1.72696	2.67957	2.10629	1.8558	1.63502
	2.28736	3.24484	1.54927	1.79233	2.40622	1.7233	2.26268	2.02432	1.75512	1.80713
	2.19995	2.10313	2.02298	2.6551	2.23578	1.84389	2.03332	2.1564	1.85878	1.7927
	2.27068	2.18702	1.50583	1.87035	2.45376	1.79223	2.51307	2.05443	1.69817	2.04506
	2.10851	1.96571	1.60407	2.05847	2.6595	1.76576	2.41529	2.09734	1.74969	1.73145
	2.27065	1.98226	1.86613	2.35047	2.07306	1.93619	2.16717	1.94097	1.60103	1.8815
	2.25083	2.05067	1.55385	1.93813	2.44078	1.69298	2.11018	2.1279	1.52989	2.01932
	2.30171	2.18031	1.80128	2.4097	2.12939	1.61646	2.00533	1.92064	2.06144	1.95648
	2.29432	1.95908	1.58596	1.93943	2.28218	2.02332	2.45437	2.03076	1.54705	1.80401
	2.28429	2.14442	1.82268	2.2996	2.33056	1.74764	2.74779	1.87276	1.83138	1.7105
	3.13005	2.6166	1.84678	1.87829	2.33776	1.43395	2.47821	2.03134	1.77794	2.1144
	2.05972	2.40051	1.70213	1.83049	2.62515	1.97917	2.04774	2.07034	1.63412	1.71045
	2.21113	1.67968	1.90776	1.91778	3.13017	1.74594	2.17053	2.06941	2.01348	1.4675
	3.05001	1.89166	1.86937	1.95588	2.53114	1.51987	2.24767	2.68382	1.55211	2.00033
	2.40054	2.33986	1.68319	1.87089	2.53095	1.81152	2.50476	2.07848	1.6786	2.12698
	2.20977	1.81002	1.90142	1.84032	3.04559	1.72696	2.5059	2.31526	1.56874	2.03026
	2.72177	2.37382	1.52073	1.94796	2.38748	1.87415	1.92843	1.96548	1.97671	1.41567
	2.2343	2.27605	1.58044	1.8886	2.79948	1.77109	2.53946	2.20464	2.03818	1.72666
	2.12983	2.03298	1.59009	1.81762	1.92001	1.60491	2.88229	2.01754	1.66735	2.26468
	2.18646	1.86208	1.563	2.19847	2.39491	1.94887	2.2154	2.15503	1.88806	1.69196
	2.11193	1.85119	1.93499	2.2261	2.5825	1.70084	2.45083	1.89367	1.54027	1.8156
	2.31021	2.15327	1.65565	1.96849	2.05646	1.87096	2.43097	2.19115	1.59517	1.80714
	2.22977	1.9024	2.27066	2.1347	2.34941	1.78216	2.25721	2.00158	1.95211	1.84322
	2.17198	1.83264	1.63224	2.20713	2.6987	1.76108	2.30077	1.94822	2.18344	1.81364
	3.12356	2.03164	2.50929	1.67013	2.40397	1.93386	2.69142	2.20622	2.11821	1.73337
	2.08024	2.04913	1.60932	2.25006	2.88263	1.81504	2.22491	2.77428	1.87824	1.71714
	3.2269	1.97202	2.16698	2.3144	3.23248	1.76661	2.71129	2.35587	1.79436	1.48338
	2.20756	2.10887	1.55831	1.77175	2.389	1.71777	2.03802	2.16767	1.69514	1.8478
	2.12622	1.98105	1.66329	2.31376	2.3207	1.55196	2.54171	2.44479	1.86347	1.7127
	2.28601	1.88196	1.66358	1.81141	3.1408	1.85115	2.3626	2.08035	1.87966	1.56216
	2.93014	2.04634	1.68814	2.72976	3.21882	2.19047	2.2823	2.02573	2.14826	1.56857
	2.38431	1.96963	1.53843	2.26599	2.23798	2.23517	2.68711	2.01364	1.8042	1.56271
	2.15076	2.35898	1.7231	1.79697	2.93092	1.74729	2.79777	2.20685	2.23219	1.71765
	2.2508	2.0503	1.83732	2.21869	2.01693	2.18397	2.51684	1.94675	1.98315	1.69771
	2.25722	2.18225	2.0763	2.22806	2.22051	1.82721	2.74229	2.02383	2.30978	1.991
	2.24282	2.17799	1.6774	2.55546	2.14512	1.82662	2.16267	2.06058	1.61228	1.78074
	2.18154	1.81497	2.25798	1.81668	2.87465	2.28477	2.82076	2.11519	2.35177	2.18363
	2.11433	2.39626	1.72491	2.22717	3.45831	1.58125	2.69967	2.21003	2.2175	1.84739
	2.1264	2.37554	2.10497	1.80994	2.27393	1.86205	3.03015	2.04283	1.67255	2.40315
	2.28351	2.2895	1.72978	2.3305	2.78037	1.37574	2.33601	2.18579	1.79543	1.98685
	2.36068	1.90143	1.74941	2.08293	3.05825	1.97901	2.32798	2.15693	1.96011	1.74437
	2.14937	1.95403	1.78963	1.76726	2.15578	2.14811	2.80796	2.14447	2.43672	2.08657
	2.20805	1.80065	1.81303	2.194	2.63378	2.07031	3.2311	1.92921	2.51311	1.69675
	3.19842	1.65394	1.60361	2.1516	2.25184	1.80061	2.70377	2.48689	1.81079	1.89732
	2.29634	1.94507	1.99748	2.39664	2.33178	2.24986	3.86113	1.93191	1.80273	1.52825
	3.07112	2.25193	1.56501	2.53602	2.88307	1.70147	2.24986	2.89117	1.52615	2.0991
	2.70432	2.40206	1.65069	2.03678	2.02105	2.26492	3.25356	2.00582	1.5607	1.66385
	2.38746	1.90401	1.71924	2.26696	2.46141	2.03187	2.25232	2.04191	1.42285	2.08573
	2.51423	1.6837	1.59292	2.27086	2.78784	2.31268	2.40381	2.05275	1.74405	2.00419
	2.19623	1.97872	1.64954	2.47148	2.27919	1.99293	2.66016	1.99093	2.06663	1.99455
	2.14653	1.88443	1.91158	1.73723	2.19023	1.82552	2.37773	1.99826	1.42455	1.9872
	2.37819	1.74095	1.53876	2.27851	1.98675	1.94061	2.72929	2.35862	1.48441	1.91751
	2.14609	2.2317	1.74545	2.11761	2.2708	2.22667	2.39032	2.52574	1.63116	2.1185
	2.4778	1.64734	1.63304	2.18007	2.98018	1.94919	2.3262	2.69596	2.22627	1.85892
	2.16044	2.74731	1.73665	1.82864	2.08774	1.69858	2.30534	2.01644	1.80974	1.91432
	2.91104	2.14166	1.90644	1.84146	2.17179	2.12729	2.33902	1.98388	1.67144	2.02406
	2.14561	2.29444	1.89495	2.00843	2.28666	1.76005	2.37898	1.96624	1.6781	1.79477
	2.28796	2.55005	2.03971	2.16266	2.06512	2.56559	2.41532	2.96467	1.80015	1.97497
	2.11197	1.55796	1.87496	2.31041	2.22155	1.73729	1.96679	2.06217	1.83971	1.79884
	2.99486	2.18479	1.54975	2.54398	2.15522	1.92598	2.18571	1.96881	1.89146	1.93621
	2.29739	2.67459	1.83288	2.27762	2.16951	1.70384	2.94664	2.07323	2.09091	1.67208
	2.22632	1.58897	1.87166	2.68555	2.19097	1.83534	2.5806	2.59528	1.88287	2.34413
	3.16838	2.33385	1.98782	2.32147	2.16213	1.67738	2.71723	2.04353	2.20609	1.97877
	2.15627	2.32581	1.71234	2.51055	2.20163	1.73129	2.83956	2.00795	1.54339	1.83212
	2.1112	2.02413	1.80133	2.30706	2.04256	1.43278	2.65617	2.0553	1.76767	2.00418
	2.17986	1.97836	1.89972	2.2074	1.99774	1.95959	2.14242	1.98018	1.63694	1.76137
	2.1628	2.08619	1.60021	2.22244	2.66499	1.57612	2.47037	2.07769	2.20635	1.87741
	2.20416	2.82393	2.06664	1.70539	2.56481	1.79385	2.47424	2.79357	1.96049	2.12954
	1.90567	1.73707	1.78734	1.98443	2.30884	1.43245	2.05576	2.02908	1.72033	1.64155
	2.25311	2.05994	1.78618	1.81923	2.87353	1.67181	2.18952	2.34455	1.7384	2.53221
	2.26669	2.3937	1.71819	2.95328	2.17166	1.6955	2.15047	2.06408	1.60312	1.91745
	2.24621	1.93011	1.81766	2.43826	2.03875	1.74638	2.15249	2.45144	1.90498	1.84353
	2.21194	2.09538	2.00999	2.05906	2.60067	1.87279	2.01653	2.01682	1.77378	1.65977
	2.03586	2.05882	1.76716	2.22683	1.98109	1.83652	2.44774	1.96316	1.73254	1.81675
	2.20851	2.32058	1.55723	2.02393	2.34517	1.69047	2.688	2.07493	1.97006	1.73437
	2.18659	2.18594	2.27806	2.07797	2.13155	1.69181	2.12709	2.0246	1.62792	1.61833
	2.87211	2.15317	1.98143	3.37882	3.71558	1.7666	2.508	2.10952	1.87707	2.19869
	2.12762	2.03186	2.00255	2.5237	2.48546	1.53062	2.07001	1.90675	1.97003	1.8888
	2.05383	2.12469	1.73339	2.57298	2.59377	1.80256	2.25888	1.97669	1.72404	1.89558
	2.11843	2.12061	1.6697	2.19032	2.49349	1.72571	2.08343	2.68528	1.67062	1.92261
	2.22025	1.71654	2.05518	2.84317	2.12717	1.70817	2.21325	2.05376	2.07104	1.78004
	2.83864	2.63204	1.85147	1.85742	2.85161	1.94923	2.33559	1.96885	1.77565	2.02555
	2.65884	2.50028	1.68854	2.34559	2.63292	1.79557	2.64944	2.07194	1.65993	1.85766
	2.29691	2.36058	1.48173	2.57849	2.33745	1.69185	2.21448	1.97396	1.76613	1.75347
	2.19911	1.99173	1.86371	2.29737	2.66353	1.9776	2.39966	1.99954	1.75683	2.05923
	2.23502	2.15617	1.78844	1.7405	2.77111	2.03929	2.16794	1.94918	1.61736	1.71264
	2.14328	2.11654	1.70525	2.51685	2.54941	1.71259	2.17871	2.70696	1.96906	2.04743
	2.19733	2.44155	1.71465	1.78832	2.64776	1.71575	2.5467	1.96947	1.70742	2.13309
	2.12547	2.03527	1.98805	2.04042	2.94389	1.55058	1.99021	2.06431	1.66636	2.15373
	2.17084	1.9766	1.63902	2.77103	2.10525	1.68924	2.32458	2.10215	1.74872	1.7695
	2.17735	2.09807	1.58925	2.38768	2.41314	1.55771	2.15461	2.02504	1.63233	2.10866
	2.19556	2.71033	1.74952	2.06423	2.03888	1.77166	2.13589	2.14979	1.88071	1.94919
	3.17845	1.81993	1.50309	1.79561	2.05733	1.51181	2.18218	2.4577	1.97538	1.90643
	2.78712	2.16829	1.8527	2.77155	2.18139	1.93259	2.0683	2.07765	1.64339	1.90853
	2.72732	2.05286	1.68216	1.88126	2.235	2.15388	1.95381	2.0209	2.00753	2.3397
	2.37519	2.3053	1.86362	2.10278	2.43309	1.91982	2.17047	2.54837	1.85887	1.9775
	2.14775	2.15366	2.07095	2.48589	2.13746	2.00088	2.11714	2.11122	1.94954	1.90369
	2.17757	1.98369	1.68706	2.95106	2.42798	1.90454	2.28839	2.11769	1.71857	1.87125
	2.05684	1.78144	1.91704	2.31494	2.23341	1.87934	2.14404	1.96846	1.68861	1.7445
	3.52768	2.85606	1.45785	1.77947	2.24581	1.91948	2.11221	2.79741	2.02807	1.77396
	2.5191	2.19893	1.52189	1.89576	2.07493	1.76627	2.62532	2.00319	2.41782	2.07982
	2.4664	2.23671	1.98071	1.78439	2.64131	1.98877	2.03498	2.06406	1.94665	1.84811
	2.28989	1.75363	1.62599	3.08202	2.10032	1.8117	2.08172	2.3024	2.15928	2.13091
	2.19884	2.34575	1.80608	2.46394	2.61438	1.73564	2.11331	2.01619	1.56044	1.82591
	2.45244	2.30419	1.80628	1.68511	1.88596	1.97732	2.54863	1.93474	1.72458	1.83576
	3.77868	1.54164	1.86718	2.1736	1.99569	1.63492	2.12771	1.84487	2.08471	1.72838
	2.15341	2.57484	1.81128	1.76326	2.28107	1.89684	1.92388	1.9009	1.70385	1.70547
	2.10188	2.23242	1.95914	2.69372	2.94046	2.03404	2.7556	1.94436	1.69223	2.12375
	2.06547	2.05161	1.96971	2.20692	2.00678	1.83856	2.12282	2.04685	1.88197	1.93549
	2.1173	2.04658	1.97489	2.60521	2.0073	1.82499	2.38856	2.41079	1.79001	1.60633
	2.10127	2.57592	1.85048	1.80181	1.99191	1.51232	2.95725	1.89476	1.74042	2.12299
	2.96747	2.62185	1.99586	1.92855	2.53476	1.56205	2.40235	2.02823	2.18505	1.84114
	2.15171	2.70701	2.38223	2.18202	2.39039	1.82728	2.37114	2.21976	1.57734	1.59994
	1.9469	2.10473	2.14328	2.0798	2.10188	1.98024	2.08268	2.03685	1.73659	1.72569
	3.40508	2.02809	2.10282	1.91007	1.99675	2.05509	2.05984	1.96255	2.24541	2.20868
	3.79021	2.38776	1.98088	3.57935	2.41885	2.27526	2.27051	1.9591	1.56	1.9267
	2.18175	2.0808	2.03647	2.99666	2.09858	2.08038	2.48075	2.00373	1.61074	2.24913
	2.1947	2.27082	2.33567	2.026	2.13508	2.36289	2.14956	1.95282	1.91827	2.14276
	2.26779	2.1353	1.74013	2.32355	2.21513	2.24603	2.75488	1.94886	1.65318	1.83252
	2.115	2.06444	1.63448	1.88932	2.53884	2.30546	2.3028	1.94425	1.68773	2.05295
	2.11462	2.12516	1.80518	2.55007	2.0727	1.7355	2.13232	1.98996	1.73935	1.73697
	2.64392	2.38825	1.98371	1.84541	2.42481	1.46266	1.92418	1.98475	1.85471	1.75021
	2.72926	1.53778	1.8164	1.81105	2.37841	1.81975	2.35778	1.89819	1.83312	1.97832
	2.32078	2.45264	1.98734	1.79343	1.93338	1.66797	2.18739	1.9176	1.86273	1.96884
	2.38851	2.25473	1.62618	2.59345	2.18903	1.84813	2.06262	1.93575	1.74544	1.76072
	2.04067	1.82464	2.16289	2.25811	2.01567	1.56137	2.45587	2.02564	1.69625	1.77892
	3.05258	2.43743	2.21704	2.80786	2.42155	1.48762	2.11937	1.90624	1.84515	1.59808
	2.1171	2.43223	1.80865	1.7506	2.19623	1.60231	2.99107	1.97426	1.87799	1.63855
	2.67119	2.4352	2.07177	1.90246	2.3291	1.58113	2.08019	2.14739	1.98726	1.88801
	2.24322	2.19707	1.96991	2.43526	2.0171	1.8073	2.36747	1.95286	1.77948	1.62373
	3.17494	2.37133	1.6536	1.79505	2.01259	1.85564	1.94925	1.94595	1.62183	1.70089
	2.87816	2.01747	1.96991	1.94195	2.16424	1.97882	2.28545	2.29732	1.61405	1.79101
	3.25206	2.32521	1.75966	3.03699	2.0287	1.9155	2.49332	2.59243	1.90424	1.96951
	2.94453	1.78955	1.60635	2.44654	2.51856	2.10369	2.24213	2.06864	1.74246	2.01405
	2.10563	2.33919	1.48619	2.85233	1.84904	1.9274	3.03081	2.70923	1.62378	1.71225
	2.2957	2.23102	1.8261	1.87736	2.04449	1.67267	2.17953	2.49153	1.66709	1.79818
	3.49295	2.78837	1.95023	1.84983	2.90561	1.78226	2.32332	2.51242	1.64567	1.74951
	2.13708	1.60834	1.74374	2.02588	2.02386	1.97093	3.15669	2.30246	1.90614	1.80577
	2.05854	1.81101	1.97687	2.91278	2.05617	2.00388	2.06916	2.40652	1.76121	1.80427
	2.97639	2.0999	1.58169	1.81894	2.02665	1.80167	3.13942	2.87848	2.2647	1.56592
	2.16195	1.86117	1.93411	2.72927	2.10784	1.7257	2.86982	2.3559	1.67035	2.26357
	2.13471	2.33021	1.89104	1.7722	2.42168	1.67676	2.39623	2.05818	1.69663	2.22885
	2.46198	2.03127	1.98156	2.67009	2.56461	1.83568	2.68247	2.07574	1.63636	1.77348
	2.5676	2.53199	1.7248	2.17667	2.74272	2.00134	2.17241	2.90153	1.82655	1.72719
	2.1153	1.75905	2.04301	2.03266	2.05444	1.64226	2.6353	2.19978	1.63286	1.68275
	2.39787	1.96068	2.03523	1.78589	2.57104	1.85711	2.05522	2.43487	1.68553	1.75803
	2.68754	1.90771	1.99929	1.87816	2.07685	1.49116	2.43333	2.72032	1.80176	1.52446
	3.36928	1.77797	1.85884	1.72462	1.98135	2.063	1.98323	2.45051	1.64135	1.76538
	2.38663	2.9215	1.80966	2.18566	2.39	1.73481	2.42538	1.99419	1.81313	1.61093
	1.98652	1.9182	1.99489	1.7789	2.01031	2.41096	2.42395	2.5465	1.70653	1.64003
	2.87357	2.17724	1.93433	2.26686	2.05759	1.83881	2.61881	2.52063	1.70401	2.19725
	2.10553	2.00638	1.83215	2.69191	2.12692	1.88028	2.05494	2.73529	1.64727	2.05105
	2.54478	2.03402	1.82384	2.31799	2.28735	1.92811	2.44663	2.10817	1.7996	1.79314
	3.8483	2.08156	1.61983	3.02673	2.02202	1.7132	2.73091	2.10304	2.04214	1.72681
	2.04373	2.33039	1.68046	3.28158	2.9761	2.75108	2.2255	2.10767	1.90399	1.83825
	2.22418	2.03405	1.61065	1.76397	2.85131	1.94823	2.00227	2.1473	1.77458	1.81478
	2.13833	2.16128	1.38524	2.12106	2.10048	1.7854	1.88135	1.94753	1.70301	1.92304
	1.97042	2.32419	1.68425	1.85151	2.72434	1.7833	2.65347	2.39098	1.67342	1.85163
	2.65748	1.85453	1.79849	2.11494	2.37292	1.81625	2.66075	2.76879	1.44825	1.69416
	2.03989	2.012	2.03323	1.83206	2.41754	1.89773	3.29021	2.89495	2.41957	1.61216
	2.32414	1.91177	2.06083	1.77399	2.59093	1.91344	2.00025	2.59608	2.44739	1.82679
	2.05353	2.12235	1.86338	2.42695	2.54765	2.05526	2.17468	2.08475	1.82823	1.77179
	2.22202	1.94668	1.79027	2.6737	2.35359	1.69384	2.03936	2.48957	1.91738	1.5496
	2.4592	1.75534	1.82182	2.14338	2.70103	1.97593	2.49692	3.12449	1.87225	1.57309
	2.04131	2.01813	2.16719	1.70342	2.74561	2.02233	2.67423	2.01943	1.76185	1.43252
	2.03033	2.176	2.39042	2.13438	2.1649	1.83343	2.12759	2.25841	1.58095	2.13974
	2.36999	2.15382	1.90801	2.47998	2.27693	2.05346	2.07696	2.99863	1.67426	1.47684
	2.70444	2.28973	2.19061	2.30202	2.90437	2.01401	2.33445	2.94035	1.8819	1.9588
	2.05523	2.04629	1.68524	1.8299	2.37803	1.96825	2.69937	1.95252	1.68436	1.66227
	2.1463	1.87241	1.74947	2.13865	2.02758	1.64749	1.98953	2.11012	1.72272	1.68813
	2.03469	2.1966	1.78076	2.47452	2.45772	1.75635	1.89834	2.09341	1.66509	1.85802
	2.76934	2.41633	1.79287	2.25517	2.11451	1.85974	1.73375	2.13117	1.87625	1.51546
	3.03568	1.83203	1.70007	2.34923	2.00578	2.05176	2.1168	2.81669	1.71363	1.55486
	3.2397	2.35484	1.6579	1.94084	2.07397	1.58965	2.12091	2.03032	1.53353	1.47018
	2.35226	2.1332	2.22059	2.32077	2.37043	1.84145	2.22512	2.2657	1.61208	1.51568
	2.19947	2.2013	1.77933	1.97078	2.7317	1.77588	2.1044	2.16613	1.69574	1.77533
	2.41665	1.59425	1.92052	2.49662	2.29546	1.98172	1.68088	2.08194	1.73861	1.47384
	2.02679	1.88063	1.60448	2.67889	2.30978	1.81793	1.9258	2.06277	1.52278	1.64899
	3.07305	2.54591	1.86032	2.50533	2.30633	1.60132	1.99592	2.01879	1.78889	1.75743
	2.25206	2.11453	2.19368	1.78505	2.30009	1.83354	1.89706	2.07898	1.69758	1.9002
	2.02359	2.36562	1.98826	2.74009	2.22035	2.18863	1.92905	3.03251	1.88631	1.76261
	2.1174	1.56628	1.64144	1.85381	2.24024	1.79702	1.80455	2.79138	1.63003	1.54706
	2.20449	1.91972	1.69343	2.80449	2.24204	1.68789	2.18771	2.11693	1.8169	1.77462
	2.80685	2.22581	1.73511	2.06029	2.08251	1.95471	2.73991	2.018	1.53686	2.23521
	2.00674	2.2611	1.64663	2.07341	2.02927	1.89454	2.3634	2.68243	2.24026	1.48193
	2.11417	2.00773	2.1574	2.34612	2.72084	1.89155	2.23142	2.14589	1.58182	1.63411
	2.92139	1.98384	2.18754	1.98175	2.05449	1.86401	1.89363	2.71231	1.64243	1.84377
	2.12947	1.57347	1.82997	1.7185	2.32232	2.20484	1.80281	2.06695	1.60576	1.85403
	3.10532	2.28896	2.19051	2.66008	2.89233	1.93526	2.24636	2.06129	1.69256	1.99604
	2.30857	2.07638	1.84693	1.93683	3.19831	1.98786	2.22946	2.28398	1.85964	1.71214
	3.34902	2.31831	2.0646	2.05393	2.29817	1.54239	2.76815	2.76159	1.759	1.87373
	2.5547	2.09357	1.8172	2.39263	2.32103	1.84292	1.80188	2.59261	1.69478	1.68626
	2.68692	2.46463	1.67288	2.33106	1.97491	1.8625	2.54642	2.26786	1.49775	1.50467
	3.19767	2.61023	1.91438	2.02828	2.60141	2.0027	1.88585	2.09537	1.77303	1.86312
	2.56798	2.2806	1.92511	1.92563	2.0485	1.86421	2.52535	2.74498	1.5957	2.05385
	2.20063	2.39137	2.00078	1.91384	2.51774	2.26208	1.95054	2.0638	1.53944	1.62066
	2.19582	2.21864	1.82444	1.99485	2.669	2.11299	1.9258	2.26242	1.65477	1.94736
	2.97439	1.71891	1.85551	2.19046	2.4636	2.02455	2.15034	2.01016	1.78187	2.03833
	2.08389	2.09939	2.18582	2.42049	2.87416	1.78679	1.87854	2.55581	1.7963	1.99845
	2.29512	1.63147	1.86008	1.78376	2.40862	1.883	2.84427	2.07699	1.56552	2.02213
	1.96879	1.85691	1.64649	2.14472	2.96678	1.98947	2.73071	2.86928	1.93679	1.87518
	2.07035	1.84274	1.67362	2.67543	2.35187	2.18306	2.08377	2.08459	1.74819	2.01742
	3.03143	1.78443	1.93239	2.49457	2.07636	1.83826	2.66418	2.23637	1.61895	1.77375
	2.20452	2.00013	1.74309	2.80712	2.15575	2.20575	1.79236	2.24913	1.91083	1.90893
	2.05945	2.03392	1.932	2.01239	2.55429	1.75978	2.8558	2.1297	1.92834	1.63037
	3.41211	1.71914	1.57326	1.94233	2.11078	2.01744	2.00276	2.08471	1.90084	2.36272
	2.1185	1.96622	1.90979	1.91899	2.09502	1.56683	1.96256	2.16416	1.77064	1.76153
	2.46412	2.11948	1.71335	2.07359	2.2068	1.65478	2.31013	2.31762	1.8735	1.83586
	2.60423	2.39645	1.86339	2.61677	2.56482	1.8002	1.9844	2.13723	1.54966	1.90124
	2.3471	2.10433	1.52263	1.94912	2.50206	1.71122	1.96941	2.62176	1.86523	1.75259
	2.28123	2.07493	1.43877	1.95649	2.40267	1.67782	1.82831	2.57808	1.98335	1.8867
	1.97676	2.39359	1.65556	2.42644	2.3846	1.83362	1.89784	2.7893	2.00278	1.49628
	2.0857	2.56186	1.77037	2.01859	2.50135	1.79296	1.96198	2.23056	1.92926	1.67589
	2.11006	2.71144	1.87326	2.49327	2.14386	1.88033	2.04874	2.22241	1.80117	1.84953
	2.11852	2.10765	1.74696	2.00134	2.33289	1.67523	2.3494	2.07227	2.18218	1.91013
	2.56683	2.39294	1.69751	2.11886	2.21688	1.71636	1.8363	2.57547	1.73133	1.74938
	2.12524	2.09491	1.71239	1.93134	2.29269	1.58465	2.71692	2.23479	1.65098	1.45468
	2.19564	2.26836	1.60733	2.34882	2.23913	1.87894	2.39518	2.81098	1.86623	1.89202
	2.202	2.04142	1.44663	2.05354	2.55114	1.87031	2.31964	2.10872	1.85051	1.90679
	3.36625	2.28961	1.74186	1.88394	2.38444	1.64413	2.69174	2.58018	1.81548	1.94363
	3.10825	1.9857	1.74876	2.73847	2.45423	1.85763	2.05709	2.57702	1.7852	1.9077
	2.13219	2.11539	1.6711	1.97004	2.00321	1.62938	2.53673	2.54106	1.82974	1.77117
	2.12689	2.102	1.6905	2.51279	2.15188	1.80079	2.06033	2.03724	1.72462	2.45697
	2.56484	2.04907	1.79556	2.90951	2.62979	1.70041	1.82903	2.08918	1.86683	2.23852
	2.21605	2.07484	1.73836	2.61124	2.07114	1.57137	2.33855	2.54067	2.18056	1.96272
	3.08842	2.32751	1.65699	1.96705	2.19699	1.87887	1.88758	2.33395	1.83699	1.92671
	3.2494	1.98879	2.10922	2.33003	2.10412	1.54693	1.90204	2.14019	1.91844	1.9135
	3.2442	1.91662	1.757	2.21761	2.01247	1.92951	1.98565	2.07711	1.69661	1.76623
	2.08197	2.20976	1.5358	1.99091	2.56325	1.95672	2.0354	3.07135	2.02766	1.71645
	2.16731	2.29901	1.76738	2.69219	2.15464	1.9554	1.96935	2.13588	1.75433	1.98455
	2.42983	2.05013	2.28798	2.19635	2.57701	1.92199	2.18656	2.36456	1.94642	1.94942
	2.84172	2.10612	1.84585	2.04711	2.29176	1.68271	2.20069	2.19777	1.98765	1.84509
	2.17374	1.87455	1.73659	2.862	2.03985	1.8262	1.80711	2.09789	1.65077	2.02455
	2.16034	1.87316	1.74555	1.96908	2.39753	1.645	2.56745	2.05087	1.80459	1.65325
	2.54681	1.96195	2.18677	1.95767	2.06296	1.80541	2.46268	2.09691	1.68989	1.50644
	2.02369	1.99812	1.78297	2.4721	2.34855	1.68324	2.2832	2.56404	2.46729	1.53089
	2.19936	2.11881	1.90692	2.85604	2.33291	1.74678	2.18356	2.89416	1.89519	1.85539
	2.59561	1.96582	1.52984	2.11058	2.13223	1.51566	2.52985	2.25643	2.1439	1.63967
	2.22238	2.58715	1.79789	3.64919	2.49114	1.84041	2.88922	2.53603	1.80136	1.68195
	2.43033	1.81668	1.60988	2.14842	2.57389	1.94701	2.67363	2.78536	1.77588	1.67081
	3.16864	1.78056	1.47678	2.15892	2.21859	1.87076	1.95118	2.52247	1.81803	1.70714
	2.69217	1.73587	1.81369	1.98067	2.16845	1.71249	2.38666	2.51948	1.70974	1.6859
	2.09666	2.92055	1.8632	1.89781	2.10076	1.45239	1.94424	2.01932	1.5887	2.03777
	2.09101	1.55492	1.98235	1.92319	2.7377	2.16396	2.59023	2.06285	1.88297	1.68836
	2.89862	2.01023	2.02753	1.81396	2.36173	1.55093	1.8223	2.12392	2.04853	1.64289
	2.23374	2.11236	2.05784	2.26854	2.05551	2.00666	2.29925	2.15964	1.7908	1.47124
	1.98049	1.71366	1.74493	2.30314	1.97028	1.89529	2.44306	2.45649	2.0255	2.27767
	2.92561	2.40782	1.53778	2.25613	2.02059	2.11035	2.07449	2.07616	1.64153	1.69625
	2.09616	1.72939	1.97754	2.67564	2.0615	1.80246	1.86677	2.47169	1.84472	1.93448
	1.97839	1.69971	2.21486	2.12851	1.97305	1.81724	2.32025	2.48265	1.70064	1.57007
	2.06109	2.01838	1.81688	2.62229	2.36182	2.10251	2.05443	2.09382	1.88688	1.65974
	2.81114	2.42583	1.70446	1.9988	2.07518	1.75408	2.22824	2.41781	1.83462	1.79842
	2.77643	1.84597	2.00658	2.65886	2.32518	2.00989	3.04355	2.04252	1.84017	1.68553
	2.0803	1.94166	1.85766	2.38436	2.11119	1.96613	2.46444	2.05204	1.90448	1.60058
	3.05244	2.06114	2.18907	2.6225	2.37196	1.69365	1.94862	2.44071	1.74041	2.00621
	1.97329	2.04271	1.80722	2.87948	1.94987	1.96259	2.41576	2.04017	1.65328	1.52295
	2.20336	2.02722	1.82078	1.91423	2.18942	1.85099	1.90723	2.29092	1.74265	1.36573
	2.09449	1.86389	1.72944	1.93479	2.54951	1.96649	2.64431	2.58489	1.70955	1.92935
	2.38225	1.95867	1.63461	2.21215	3.19333	1.91069	1.82837	2.04995	1.75036	2.12501
	2.09707	2.60657	1.77859	2.56276	2.0342	1.60631	2.20475	2.58571	1.77725	1.3903
	2.0928	2.01575	2.13842	2.11268	2.21932	1.6531	2.71767	2.05107	1.77579	2.10475
	2.13949	1.82505	2.15338	3.11439	2.30257	2.22959	2.5429	2.05513	1.7387	1.71572
	2.26407	2.34432	1.96843	2.1959	2.47046	1.77201	2.18933	2.46597	1.59629	1.78797
	2.07082	1.96375	1.89532	1.94508	2.23482	2.33977	2.20261	2.12605	1.6675	1.57281
	2.02794	1.90548	1.67585	1.96211	2.11027	1.74744	3.36891	2.4476	1.55582	1.85594
	2.36604	2.01393	2.00807	1.95156	2.49076	1.76956	1.95678	2.25817	1.8168	1.67511
	2.09858	2.1157	1.82558	2.12366	2.44358	1.84997	2.1669	2.3788	1.6263	1.95566
	2.16604	2.15723	1.78927	2.40026	2.13323	1.67271	2.37188	2.1	1.80584	1.56036
	2.74119	2.36352	1.59912	2.59413	2.30695	1.77158	2.13406	2.75535	1.66078	2.01056
	2.0862	1.85149	2.03315	1.89011	2.19811	2.19012	2.25569	2.85519	1.78205	1.83368
	2.21556	1.99442	1.79887	2.38491	1.9882	1.87059	2.24946	2.6287	1.89812	2.02957
	2.18603	2.03768	1.60105	2.04162	3.04099	1.87418	2.00639	2.03762	2.06025	1.74505
	1.92465	2.49796	1.72629	2.0779	2.97287	2.01603	2.02837	2.11569	1.89557	1.83163
	3.3783	1.94402	1.51574	2.20879	3.00508	1.60056	1.89861	2.40205	1.83602	1.87149
	2.72063	1.89618	1.61525	1.99967	2.43017	1.76836	2.46943	2.5232	1.87025	1.77441
	2.02253	1.96515	2.18756	2.07083	2.61699	1.9536	2.14918	2.03674	2.00014	1.73928
	2.4762	1.88437	1.99732	2.00373	2.11919	2.27347	2.57118	2.03532	1.97454	1.71023
	2.96103	2.1871	2.31491	1.98076	2.15062	1.83094	2.64305	2.30838	1.7007	2.10012
	2.08208	2.60325	1.43545	1.91212	2.07699	1.92387	2.02857	2.06819	1.95171	1.95988
	2.22655	1.96286	2.02564	2.81438	3.16161	1.81312	2.01749	2.13175	2.00116	2.13611
	3.35434	2.10216	1.37809	3.00813	2.52992	2.01691	2.49991	2.52427	1.70931	2.08093
	2.01638	1.98402	2.01603	2.92096	2.99459	2.07062	2.36143	2.10973	1.48322	2.14416
	2.00628	2.00406	1.85268	2.02189	2.24784	2.01992	1.95483	2.07323	1.59782	2.25977
	1.94598	2.05903	2.08068	1.94394	2.81142	2.10415	2.65835	2.09438	1.83594	1.96491
	2.46562	1.83779	1.87933	1.99069	2.40791	2.05622	1.95815	2.16335	1.68781	1.65575
	2.18533	1.95123	1.84444	2.02583	2.3886	1.98667	1.98586	1.94808	1.57397	2.23451
	2.05259	2.69655	1.70575	2.91958	2.87308	1.72194	1.89711	2.4028	1.75889	1.55054
	2.34683	1.99561	1.5938	2.57559	3.15612	1.84678	2.04642	2.59842	1.97054	1.75719
	1.95196	2.50739	1.90428	2.78796	2.39803	2.28621	2.23993	2.45305	1.6614	2.25456
	1.90645	2.38364	1.84295	2.0169	2.4736	1.93314	1.93768	2.14916	1.83981	1.71908
	1.87112	2.20316	1.70024	1.88027	1.97624	2.0416	2.54055	2.48744	1.86953	2.09266
	2.22117	2.16004	1.89067	2.16575	2.04263	1.98492	1.94781	1.97198	1.66973	1.67297
	2.50321	1.91118	1.71998	3.32898	2.12536	2.00473	2.45806	2.0778	1.76599	1.80949
	2.58981	1.99244	1.76846	1.88862	2.36115	1.75206	1.892	2.14703	1.84585	1.6578
	2.13247	2.4055	1.80265	2.17006	2.10095	1.89235	1.9665	2.28137	1.55679	1.80816
	1.96693	2.62612	1.65164	2.20459	2.54851	1.94931	2.06464	2.60567	1.97829	1.87683
	2.27156	1.94344	2.05419	2.03448	2.34193	1.97335	2.05104	2.00325	1.38371	1.91658
	2.70041	2.51566	1.85757	1.9447	2.02102	2.33048	2.37616	2.65186	1.68513	1.7587
	1.86888	2.14184	1.59022	2.21446	1.88784	1.8853	2.08819	2.26747	2.09786	1.87002
	2.56196	2.33959	1.94432	2.68437	2.34095	1.77902	2.26237	2.67157	1.66323	1.95528
	3.11056	2.1948	1.89878	2.10501	1.88234	2.12726	3.00404	2.06722	1.95017	1.81981
	2.14063	2.45459	2.49107	2.12403	2.38527	1.75309	2.68079	2.22249	1.63171	1.83474
	1.94951	2.25578	1.72898	2.8632	2.59035	1.76149	1.95439	2.552	2.08684	1.71914
	2.34564	2.49969	1.81401	1.92935	2.01723	1.98897	2.40497	2.06719	1.78398	1.85896
	2.24007	1.57921	2.0128	2.21757	2.2894	2.03682	1.91815	2.07267	1.66841	1.83923
	3.7997	2.36254	1.89263	1.91786	2.58307	2.17627	3.32873	2.07598	1.59316	1.89611
	2.73886	2.31428	1.88315	2.48106	1.99206	1.75729	2.51089	1.97843	1.68358	1.63046
	2.54892	2.01444	2.25599	2.53484	2.19965	1.7679	1.95359	2.03447	1.54018	2.0319
	2.6168	2.4828	1.64272	2.03076	2.84609	2.03816	2.07482	2.26651	1.95063	1.8356
	2.39997	1.70851	1.89728	2.10768	1.9499	1.78356	2.11478	2.70639	2.00477	1.99324
	1.93978	2.09514	1.91496	3.02395	2.10155	1.81724	2.12468	2.21475	1.71121	1.68018
	1.96091	2.79097	2.20151	2.54053	2.47478	2.08283	1.99696	2.08572	1.63367	1.64969
	1.91159	2.19216	1.71667	2.62108	1.99938	2.00969	1.90202	2.04493	2.05424	2.16278
	2.28574	2.6961	2.12605	2.14724	2.60036	2.0734	2.1046	2.36694	1.69364	1.8628
	2.70657	1.63315	1.9749	2.04808	2.72707	1.68952	2.0798	1.87313	1.92054	2.04372
	2.61617	2.1769	1.76321	1.93422	2.89527	1.63747	1.8802	2.14813	2.09639	1.8357
	1.9997	2.19431	1.76038	2.4113	2.50707	2.11792	1.94468	2.62449	1.83353	1.61408
	2.11709	2.29349	1.96731	2.09701	2.18593	2.1016	2.49638	2.74662	1.92202	1.97508
	2.47424	2.43004	1.62028	1.98413	1.9936	2.03049	2.10753	2.08156	2.00401	1.75631
	1.95537	1.82828	1.84551	2.18251	1.98628	1.83184	2.53563	2.22076	1.50295	1.96489
	1.89748	1.88256	1.86121	2.047	2.22447	2.0414	2.90232	1.89936	1.69228	1.6415
	2.24063	2.03575	1.91555	1.98041	2.11007	1.68654	2.2627	2.32617	2.19473	1.84495
	2.59659	2.08854	2.68848	2.37186	2.08927	1.47965	1.96328	2.12108	2.64	1.60063
	1.99641	1.90085	1.86365	2.24201	2.11457	1.98972	2.19433	2.55501	1.81583	1.67527
	2.08208	2.18422	1.82594	2.17562	2.40972	1.9944	2.09877	2.57643	1.58251	1.63803
	2.1724	1.94718	1.73026	2.10371	2.16486	1.93372	1.9918	1.97373	2.02442	2.05964
	2.07288	2.09577	1.80775	2.85365	2.13519	1.89572	2.7676	2.32194	2.04149	1.84652
	1.97777	2.2341	1.86192	2.03335	2.11056	1.70578	1.9226	2.60656	1.86298	1.75838
	3.31605	1.63209	1.71688	1.95882	1.92986	1.7553	3.03185	2.22898	1.70796	2.16209
	2.80967	2.38451	1.56378	2.05936	2.05064	1.73232	1.91613	2.27397	1.75368	1.94031
	2.09343	2.29621	1.66226	2.93237	2.13836	1.76626	2.10652	2.70752	1.83839	2.1796
	1.94505	2.41523	1.79981	1.9953	2.00692	1.80198	2.22709	2.07591	1.82544	1.70079
	2.6266	2.13584	1.80076	1.86329	2.79379	1.9298	2.54685	2.60907	1.85402	2.00185
	1.97561	2.14447	1.95266	2.23766	2.05827	1.62861	2.29377	2.77039	1.55504	1.83694
	3.61463	1.92814	2.18555	2.4362	1.98931	1.81509	2.11783	1.99983	2.01408	1.75026
	2.18898	2.2195	2.12131	2.13272	2.06365	2.08924	2.46857	2.15254	1.6922	1.82226
	2.13514	2.16023	1.87179	2.11509	2.39323	1.78642	2.70314	2.82636	1.89093	1.95527
	1.99498	1.98513	1.93588	2.34534	2.33554	1.8591	1.91458	2.58907	1.71185	1.67371
	2.19967	1.85495	2.56534	2.14745	2.03032	1.70581	1.93987	1.98691	1.8535	1.6031
	1.9059	2.02166	1.87862	2.25975	2.29705	2.06507	2.59299	2.03565	1.73961	1.9059
	2.66399	1.90235	1.51279	2.67185	2.05951	1.88327	2.45354	2.23951	1.74225	1.76163
	3.40335	2.05749	1.94615	2.50333	1.98088	1.68434	2.3147	2.0113	1.77299	1.80753
	2.04871	2.06153	2.12214	2.64643	2.14292	1.66173	1.99382	2.21296	1.81489	1.86836
	2.20956	2.28514	1.62301	2.53759	2.09779	1.88922	2.61887	2.15023	1.5871	2.09041
	2.16325	1.84765	2.04556	2.22569	2.59383	1.79824	2.81419	1.97645	2.17553	1.78066
	1.9347	2.09254	1.97166	1.76357	2.66345	1.70653	1.8383	2.96847	1.89092	1.74384
	1.99395	2.0282	1.88764	2.96217	2.38474	1.71362	2.53058	2.12682	1.75454	1.94261
	3.03404	2.04783	2.33055	1.90571	2.16477	1.91338	2.15155	2.03402	2.09373	2.15277
	1.96975	2.40988	1.63413	1.87358	2.30741	1.90716	2.26043	2.29141	1.99792	2.52628
	2.03453	2.0124	1.99163	2.10172	2.82368	1.79889	2.58121	2.13749	2.14967	1.87615
	1.97985	2.40201	1.90157	1.95998	2.05792	2.44119	2.33274	2.62909	1.80633	2.60933
	2.48675	1.78455	1.81806	1.99571	2.03936	1.67945	2.37897	2.24955	1.76135	1.87175
	1.99207	1.96986	1.8808	1.77061	2.08506	1.88933	2.05624	2.02981	1.87634	1.50113
	2.21805	2.17391	2.02212	1.73277	2.57414	2.30842	1.8465	2.4722	1.71964	1.91972
	3.5088	2.08218	1.82534	2.54146	2.04933	1.86775	1.82325	2.90268	1.80769	1.48567
	1.90597	1.84337	1.78333	1.97371	2.1239	1.6516	2.73866	2.16792	1.75952	2.1103
	3.28952	1.57241	2.04701	1.96264	2.06553	1.84553	2.01034	2.15579	2.09	1.61692
	2.29893	2.14028	1.85562	2.08834	2.11444	1.91772	1.92453	2.04562	1.9486	1.80692
	2.00005	2.0665	1.98485	3.15076	2.22337	1.82611	2.07238	1.94989	1.99711	1.86698
	1.95006	2.28556	2.01035	1.97972	2.25674	1.78963	1.89689	2.60037	1.9633	1.66667
	1.91137	2.05485	1.75854	1.88366	2.31285	2.37278	2.19901	2.13637	1.86701	2.20696
	2.1042	2.04459	1.88852	1.91311	2.71917	1.65697	2.49748	2.13352	1.90296	2.02763
	2.06812	2.13148	1.8747	2.84541	2.12322	1.87376	2.73552	2.0959	2.27893	2.05278
	3.33226	2.10279	2.06803	2.91994	2.19635	1.61868	2.55702	2.11183	1.9744	2.20054
	2.28793	2.24731	1.77851	2.20149	2.84907	1.97016	1.79764	2.18896	2.04009	1.8209
	1.87595	2.2844	2.02557	2.78908	2.25218	1.82602	2.18537	2.35126	1.8104	1.79387
	1.91502	1.98445	1.83805	2.02099	2.13941	1.78617	2.00851	2.52698	1.98276	1.61441
	1.94625	2.28826	1.66726	2.31717	2.07453	1.77244	2.23987	2.15639	2.02434	1.94886
	1.91317	2.29483	2.69796	1.91049	2.10525	1.55673	1.8751	2.02019	1.78387	1.93944
	2.19293	2.25651	1.66981	2.28365	2.06379	1.76645	2.09208	2.87992	1.78056	2.05536
	1.9621	2.51411	2.39645	1.88963	2.3848	2.09781	2.08209	2.49536	1.69528	1.99951
	1.89909	2.24447	1.67476	2.29359	2.57522	2.21958	2.30565	2.3194	1.87475	1.94458
	1.97418	2.25387	1.59324	1.97993	2.32815	1.5975	2.19345	2.02916	1.94853	2.02012
	1.97128	2.07365	1.77867	2.10159	2.10808	1.75124	1.80052	2.15075	2.29311	2.14076
	2.02095	2.68898	2.04521	2.12955	3.20504	1.93744	2.59461	2.10017	1.64579	1.76547
	2.04233	2.09912	1.72344	2.54477	2.08485	1.99762	2.24138	2.10344	2.12088	2.22665
	1.8842	2.46719	1.8099	2.2959	2.36506	1.82794	1.89571	1.99613	1.67063	2.45766
	1.97229	2.62149	1.59325	2.22873	2.06868	2.16569	1.9936	2.48778	1.81296	1.76057
	2.34144	2.60821	1.76963	2.2471	2.10844	2.102	2.67505	2.17844	1.88691	1.97092
	3.86302	2.15096	2.33597	2.05296	2.87113	1.9205	2.61317	2.38319	2.06286	1.58247
	2.42248	2.02312	2.04821	2.26401	2.63844	1.8827	1.92315	2.06157	1.79995	1.71364
	2.73124	2.18647	2.24256	2.39762	2.22062	1.75748	1.98283	2.54972	1.64135	1.86175
	2.09067	2.1302	2.19801	2.32726	2.19165	1.4571	1.77596	2.16193	2.04866	1.73326
	2.07208	2.32827	1.68901	2.47599	2.05611	2.03916	1.91406	2.11169	1.91788	1.70933
	1.99122	2.40422	1.73313	2.38765	2.27983	1.82343	2.13262	1.95875	1.91234	1.59663
	2.79263	1.88547	2.00223	2.59364	2.0508	1.63003	1.78395	2.3876	1.94804	1.74608
	2.8991	1.99975	1.86355	2.30742	2.02189	1.82373	2.17441	2.72146	2.04495	1.64102
	3.10786	2.28006	2.08366	2.48658	2.17287	2.07648	2.78765	2.0992	2.07564	2.02985
	3.74679	2.20242	1.62368	2.02051	2.53598	1.60743	1.79314	2.28255	1.85182	2.09263
	2.30656	2.3829	1.97915	1.89403	2.16086	2.05006	2.1647	2.1157	2.07773	1.91619
	2.00479	2.49923	2.16747	1.9296	1.97356	2.13451	2.50939	2.32392	2.28988	1.60986
	3.12631	1.997	2.02178	2.56127	2.01021	1.81266	3.56053	2.14303	1.88343	1.68192
	2.12914	2.06059	1.66453	2.19771	2.33352	1.4975	2.41685	2.60469	1.64686	1.88735
	2.46623	2.07764	1.64788	2.97647	1.89122	1.93619	1.82968	2.2774	2.1572	2.06735
	2.31066	2.05967	1.80592	2.44389	2.34468	1.84662	2.67594	2.91587	2.23176	1.76355
	2.35452	2.05501	1.82699	1.97512	2.03744	1.88418	2.29586	2.19048	2.56229	1.67089
	2.64775	1.89668	2.14142	2.53438	2.07706	1.7827	3.04431	2.03208	1.87008	2.10358
	2.09212	2.35677	1.97626	2.22969	2.2512	1.78821	2.06322	2.0159	1.96331	2.02532
	1.90865	2.04735	1.92409	2.28577	2.07407	1.69824	2.78477	2.20432	2.19269	1.66367
	2.12846	2.10527	1.77504	1.84571	3.00339	1.79792	1.77751	2.10255	1.75039	1.77367
	2.48845	2.86391	1.85925	2.29912	1.99422	1.96185	1.69973	2.79827	1.82858	1.67384
	1.975	2.03974	2.11496	2.67978	2.1758	1.72266	1.8547	2.00785	1.99022	1.59433
	2.54435	1.99955	1.7163	2.09489	2.02647	2.07058	2.16133	2.09517	1.9841	1.53133
	2.1795	2.04489	1.81983	2.32044	2.10191	1.91321	1.86111	2.75401	1.6762	1.77656
	2.15521	2.2865	1.81343	2.18072	2.85653	2.04881	2.8579	1.99353	2.12427	1.593
	2.48323	2.01455	1.78862	2.56018	2.26648	1.81954	1.98436	2.72435	1.78134	2.18078
	2.04494	2.05478	1.84848	1.86722	2.08481	1.87367	1.80402	2.15431	1.69681	1.56126
	3.17519	2.09591	1.85842	1.82508	2.51077	1.99863	2.236	2.21748	1.84247	1.75506
	1.99682	1.9433	1.79181	2.25089	2.1804	1.75401	2.08535	2.21972	1.82011	1.7213
	2.15181	1.96839	1.6764	2.12658	2.094	1.64408	1.81639	2.53011	1.59779	1.80186
	2.2696	2.33668	1.79734	2.21726	2.36746	1.87829	1.80414	2.29268	2.04727	2.00048
	1.987	1.75563	1.78924	1.78458	2.04046	1.89544	2.56972	2.03722	1.638	1.72332
	2.03126	2.26512	2.10343	2.27734	2.23571	2.27599	2.2499	2.28958	1.7771	1.69424
	1.9485	1.71004	1.83202	1.70113	2.40118	1.90735	2.92693	2.25816	1.5953	1.62011
	2.90966	1.54602	1.67063	2.10396	2.40456	1.55788	1.93133	2.35008	1.85719	1.62265
	1.96186	2.0218	1.74618	1.64611	2.41726	2.01473	1.8002	2.38599	1.65312	1.72999
	3.32849	2.03566	2.04217	2.0133	2.06828	1.72331	1.80676	1.99524	1.6578	1.79619
	2.00586	2.3249	1.81258	1.84666	1.95849	1.92548	2.1493	2.05827	2.2733	1.67862
	2.49849	2.12537	1.85584	2.06234	1.93449	2.0405	1.78466	2.16047	1.83672	1.67509
	2.16248	1.49972	2.15783	1.89301	2.06824	1.94147	1.84679	2.04074	1.83526	1.63037
	2.09255	2.5162	1.76795	2.31434	2.01602	2.11486	3.39706	2.51555	2.17598	1.96083
	2.00436	2.29158	2.09295	1.73346	2.05152	1.69599	2.6413	1.99572	1.64997	1.68342
	2.22539	1.49032	1.68655	1.91599	1.97212	1.84526	2.26268	2.30593	2.42996	1.8411
	2.33219	2.51407	1.86295	2.19433	1.99826	1.87789	1.90811	2.10762	1.7102	1.93097
	1.96451	2.07302	1.67573	3.3521	2.16804	1.72296	2.68507	2.08081	1.70598	2.02658
	1.98131	2.28525	2.02461	2.96988	2.03154	1.79963	1.9269	2.19213	2.25223	1.54486
	2.9243	1.98271	2.20569	2.82806	2.09005	1.88234	1.9131	2.11848	2.24481	1.61052
	3.04308	1.90387	1.84076	2.19773	2.08453	2.09753	2.70737	2.31195	2.01692	1.65833
	2.01379	2.08154	2.00016	2.98978	2.81127	1.80893	2.17317	2.10371	2.03218	1.7067
	3.06077	2.21538	1.75817	2.35896	2.0726	2.03406	2.03034	2.18928	2.09328	2.35391
	1.96663	2.03979	2.19073	2.87692	2.17177	1.99496	2.09052	2.11959	1.94164	1.7725
	2.01791	1.79027	1.91174	2.48985	2.06043	2.31021	1.9272	2.03099	1.63011	2.12691
	2.08276	2.17582	1.93093	2.15668	2.36709	1.80893	2.50063	2.19555	1.69689	1.97022
	2.46699	2.07119	1.74685	2.87527	2.85332	1.92263	3.34009	2.2487	1.95653	1.82152
	2.4298	1.82336	1.77386	2.31376	2.14444	1.83591	1.68542	2.9317	2.01151	2.13633
	1.98273	1.94493	2.19308	2.53368	2.0581	2.09737	2.15294	2.04678	2.11138	1.85887
	2.05134	1.96824	1.82505	2.52804	2.20878	2.53691	2.08911	2.08673	2.12443	1.83544
	2.94337	1.80731	1.75576	2.99423	2.26582	1.76831	2.02096	2.07963	2.25593	1.84265
	2.67316	1.9319	2.28972	2.2336	2.51518	1.66654	2.88124	2.07734	2.08112	1.47249
	2.26589	2.16745	2.15716	2.18971	2.03775	1.80116	2.0834	2.61541	1.68287	2.17044
	2.14632	2.15634	2.06241	2.01491	2.91844	1.8606	2.03572	2.53172	2.1445	1.7977
	2.27996	1.90206	2.0829	2.70553	2.04652	1.89222	3.26048	2.11919	1.72965	2.13185
	3.28625	1.81866	1.95005	1.91392	2.14227	1.82585	2.0572	2.94285	1.69638	1.58888
	1.96624	2.60827	1.97291	2.71698	1.9667	1.89024	1.91483	2.90572	2.11919	1.85162
	2.08905	1.93038	1.99115	2.31335	2.36064	2.14038	2.26188	2.62237	1.54621	1.70621
	2.1008	1.84798	2.26087	2.76283	2.55008	2.09268	1.99842	2.10036	1.80283	1.93771
	2.14319	1.88684	2.13842	2.01727	2.56251	1.72451	2.23442	2.04415	1.86551	1.69073
	2.23647	2.32831	1.7404	2.53074	3.23365	1.9247	2.0903	3.17936	2.00248	2.05443
	2.05677	2.09904	2.47006	2.20941	2.00551	1.8981	2.20342	2.1732	1.68347	1.87711
	2.10316	2.17142	1.74221	2.49903	2.49275	1.80168	2.95546	1.97698	2.08976	1.68599
	2.49525	1.8596	1.67544	1.84156	2.04828	1.71991	2.90529	2.21222	1.68066	1.6922
	3.14484	1.81414	2.07709	2.43013	2.18345	2.20475	2.00142	2.18532	1.65381	1.83489
	2.6475	1.88034	1.97467	1.64791	2.0749	1.7545	2.70933	2.04089	1.81315	1.31084
	2.19823	2.01242	2.10499	1.71407	2.68419	2.19139	2.7336	2.00938	1.65701	1.93201
	2.54905	2.06337	1.85485	2.46982	2.05688	1.79784	2.18562	2.22573	2.00396	1.68315
	2.2027	1.58122	1.93826	2.23698	2.10866	1.9145	2.46906	2.3259	2.06712	1.81
	2.49808	1.81394	1.84346	2.4023	2.5527	1.94985	2.2669	2.12195	1.72428	1.48619
	2.89128	2.00429	2.10246	2.21485	2.43197	1.85821	1.9494	2.29748	1.78211	1.6949
	2.96416	2.16464	1.92264	2.36193	2.22627	1.78635	2.31754	2.15328	2.23722	1.62202
	2.13164	2.12656	1.75141	2.37514	2.04528	1.96504	2.83997	2.52193	1.77499	1.74559
	2.50124	2.23275	1.6416	2.6194	2.32054	1.72304	2.09216	2.94199	1.79911	1.70661
	3.24359	1.90782	1.93264	2.32464	1.98351	1.74979	1.97874	2.72692	1.79241	1.77121
	2.64959	1.98691	2.03806	1.98908	2.19127	1.96306	2.01852	2.17932	1.66162	1.69788
	3.1321	2.07713	1.89789	2.34755	2.24043	1.904	2.12169	2.08268	1.95358	1.98262
	2.11216	2.17092	1.8754	2.43183	2.61206	1.92276	2.01389	2.16369	1.81557	1.9239
	2.51312	2.24905	1.56484	2.27173	2.31432	1.90665	2.00999	2.40754	1.94055	1.91653
	2.22444	2.06516	1.87086	2.26118	2.04847	1.95934	2.01765	2.80503	2.43897	1.65174
	2.77693	2.15442	1.83011	2.38009	3.25258	1.72801	2.74678	2.68939	1.70426	1.82895
	3.09344	2.05449	1.6689	3.24599	2.43985	2.11219	2.04201	2.25649	2.09619	1.70881
	2.4901	1.83485	1.76785	2.71133	2.02875	1.62434	2.37497	2.09981	1.85714	1.66302
	2.29122	2.44408	1.6406	2.87492	1.95382	1.9504	2.07964	2.2461	1.79208	1.66577
	2.53675	2.0858	1.78215	2.21449	2.66406	2.03938	2.03683	2.09706	1.72698	1.88693
	3.01028	2.11978	2.0855	2.12152	2.15519	1.9867	2.21398	3.51873	1.74243	1.8817
	2.10343	1.88652	1.72225	2.16255	2.28316	2.41711	2.33298	2.14373	1.86725	2.09286
	2.45382	2.37343	1.85871	2.2573	2.24483	1.8412	2.24699	2.4472	1.84709	1.51556
	2.80084	1.85346	2.37651	2.56959	2.08291	1.66751	2.37651	2.0704	1.72494	1.80123
	2.6993	2.26759	1.63248	1.80167	1.9922	1.61742	2.18004	2.12968	2.04725	1.89336
	2.68759	2.02014	1.79224	2.32141	3.03358	2.16146	1.90772	2.26591	1.71891	1.90471
	2.26005	2.05823	2.02772	2.35231	2.14507	1.98693	2.47843	2.60375	2.04362	1.39376
	2.80871	2.11916	2.01108	2.0425	2.08277	2.17374	2.91358	2.54237	2.16158	2.06815
	2.70626	1.95365	2.12284	1.94683	2.34963	1.83848	2.01772	2.59206	2.22571	2.14373
	2.39755	2.66445	1.72208	1.67388	1.98201	2.13258	2.69646	2.08155	1.86884	2.04551
	2.15553	2.43166	1.63882	2.24317	2.21225	1.78828	2.19281	2.43154	1.87937	2.27178
	2.91023	2.01798	1.92024	3.18784	2.19119	1.53158	2.0542	2.38652	1.93942	2.2218
	2.19842	2.19665	1.65724	1.9601	2.02993	2.00926	2.02284	2.536	1.87388	2.08781
	2.02387	2.06264	1.87875	2.26171	2.04028	2.23116	2.01552	2.87787	1.58025	1.88079
	2.22793	2.0078	1.97518	2.60257	1.97964	1.74742	2.75442	2.56523	1.71172	1.84694
	3.19181	1.90001	1.82983	1.85222	2.18793	1.81194	2.10849	2.11861	1.42142	2.27371
	2.3152	2.02439	1.88641	2.17268	1.98256	1.82685	1.99569	2.10465	2.21744	1.95971
	2.25039	1.94678	2.26837	2.19297	2.09917	1.75533	1.98052	2.13518	1.84303	2.00235
	2.88788	2.4048	1.76697	1.82632	1.961	1.89804	2.21908	2.11706	1.67224	1.94899
	2.04444	2.21053	1.97547	3.06192	2.0858	2.45248	1.98591	2.22904	1.73997	2.25581
	2.0272	2.2227	1.52547	2.57485	2.06919	2.44789	2.23517	2.05072	1.76608	1.97435
	2.51439	1.79693	2.27501	2.09417	2.01394	1.58506	3.03221	2.2256	1.47615	1.6389
	2.38467	1.8907	1.73044	2.11545	2.04943	1.61604	2.91275	2.11956	1.87111	1.94398
	2.29572	2.06981	1.42963	3.07547	1.98452	1.86934	1.95209	2.02022	1.87328	1.95725
	1.97165	2.08697	1.74982	2.62548	1.91963	1.75393	2.04289	2.019	1.83726	1.71285
	2.69059	2.75402	1.60698	2.19455	1.97491	1.81804	2.02806	2.05179	1.79475	1.56651
	2.70683	2.04888	1.84112	2.21478	2.08894	2.39253	2.02677	2.63971	1.70736	1.37754
	2.3653	2.25759	1.84378	2.134	1.95998	1.86783	2.11878	2.11337	1.59952	1.58422
	2.6707	1.93213	1.83788	2.53813	2.11652	1.90159	1.93566	2.63257	2.3966	1.67148
	2.33402	2.22474	1.78218	2.25514	1.97496	1.91718	2.29362	2.33245	1.8181	1.78455
	1.96322	1.98005	1.64138	2.0482	1.96813	2.12796	2.83393	2.131	1.65936	1.93932
	2.45004	2.21298	2.17109	2.12778	1.98059	1.80517	2.44583	2.12322	1.97603	1.55995
	2.45361	2.19467	1.53156	2.24271	2.22622	1.82684	2.0906	2.53275	1.95163	2.03342
	2.49743	2.23583	1.59062	2.30402	2.08773	1.8472	2.73579	2.01797	1.56968	1.98855
	2.00521	2.28513	2.24491	2.36396	1.98681	1.45308	2.09816	2.27178	1.66494	1.62414
	2.25572	2.25592	2.1404	2.04765	2.08785	1.79912	2.68054	2.07155	1.81057	1.78346
	1.96768	2.07374	1.55661	2.51997	1.98485	1.8128	2.65197	2.23629	1.98799	2.18312
	2.08343	2.21481	1.95553	1.99834	2.13865	1.76694	2.03569	2.10594	2.28854	1.56267
	2.08222	1.88306	1.62297	1.94074	1.9958	1.67119	1.99776	2.50062	2.0037	1.95041
	2.01032	2.71497	1.90355	2.14505	2.89417	1.72923	2.10638	2.26454	2.08623	1.96519
	1.96339	2.00181	1.82694	1.67082	2.22185	1.72985	1.96908	2.55721	1.87179	1.96231
	2.29997	1.8828	1.73925	2.1709	2.37098	1.98151	2.29317	2.31723	1.78286	1.95869
	2.73346	2.17937	1.7406	2.09765	2.00071	2.46837	2.48543	2.05291	1.64922	2.17179
	2.00931	2.01852	1.72554	2.6366	1.99046	1.61769	2.89975	2.21662	1.622	2.48435
	2.96573	1.94013	2.05091	2.72928	2.5782	1.95344	2.68081	2.2899	1.85816	1.69416
	2.94252	1.88028	1.98352	2.3868	2.01924	1.78087	2.09837	2.11491	1.75723	1.42369
	1.85427	2.23976	1.95446	2.60934	1.93646	1.96112	2.19603	2.528	2.04721	1.964
	2.64065	1.85112	1.75028	2.31465	2.05724	1.62501	2.0323	2.10699	1.55756	1.98661
	2.41775	2.21931	1.74615	1.91907	2.26644	1.62623	2.12824	2.18262	2.01204	1.95877
	2.31137	1.7992	1.6882	2.68487	2.29305	1.72112	2.0729	2.39463	1.81864	1.45735
	2.11178	2.2317	1.86732	2.09768	2.14649	1.76133	2.55182	2.38926	2.00721	1.52962
	2.10769	1.67549	1.6593	2.08092	2.62261	1.91613	3.31288	2.05372	1.98838	1.85305
	2.00023	2.00438	1.78057	1.88422	2.54657	1.99068	2.72481	2.0558	1.5706	1.91928
	2.01731	1.75738	1.4937	1.75167	3.07178	2.34983	2.36404	2.01419	2.13341	1.38812
	3.11356	1.98509	1.8342	2.49428	3.59013	1.80398	2.12683	1.978	2.22641	1.8658
	1.93527	1.99468	1.8785	1.84938	2.33406	2.31583	2.09272	2.09486	2.03811	1.89879
	2.27463	2.59765	1.58427	3.2628	2.67247	1.72029	2.20191	2.25763	2.29237	1.43074
	2.986	2.076	1.57146	1.99679	2.59378	1.73329	2.3609	3.11006	1.96429	1.72699
	2.11192	2.04544	1.97174	2.99513	2.08749	1.80677	2.22404	2.06113	1.72441	1.5193
	3.06601	2.30148	2.15951	1.64337	2.74265	2.46048	1.82366	2.09802	1.9554	1.75162
	1.88718	2.85259	1.69665	2.69822	2.25663	1.72065	1.91678	2.33888	2.0046	1.73796
	3.63519	2.12563	1.91024	2.09631	2.81096	1.79001	2.00045	2.24648	1.94517	1.86531
	1.96038	2.17275	1.84439	2.30305	2.89819	1.86461	2.1022	2.31002	1.84938	1.83696
	1.9711	1.9841	1.8175	2.84037	2.13945	2.02361	2.15586	2.03143	1.75245	2.41107
	2.83888	2.11654	1.82057	2.53786	1.99435	1.83881	2.67182	2.15431	1.93974	1.60751
	2.59279	1.87145	1.82779	2.82809	2.08993	1.83967	2.10642	2.205	1.66713	1.7449
	2.13079	1.89303	2.06124	2.44326	2.505	1.78227	2.03523	2.49522	1.72872	1.98171
	2.09786	2.14015	1.74539	2.84052	2.73001	2.19629	2.9922	2.51498	1.51044	1.81896
	2.00606	2.14373	2.04935	2.61509	2.29755	2.06666	2.05579	1.98562	2.07416	2.01854
	3.12279	2.00308	1.80744	2.39972	2.28034	1.96127	2.80429	2.32006	1.66821	1.56914
	2.97505	2.14937	1.51388	2.355	2.94472	1.91988	1.8677	1.95731	1.58335	1.91352
	3.47295	2.17978	1.96256	2.63723	2.30449	1.73653	2.91365	2.22871	1.98069	1.64699
	2.60498	2.38026	1.68018	2.38743	2.46381	1.71686	2.04258	1.95985	1.6072	2.11942
	2.46772	1.95767	1.91749	2.70986	2.66103	1.73669	2.29656	2.44166	1.98293	1.48183
	2.13217	1.79191	1.87732	2.55094	2.11917	1.61959	2.35806	2.2132	1.86161	1.59487
	3.25413	2.21191	1.67626	3.02803	2.12621	2.54789	3.41448	2.10412	1.56828	1.46501
	2.87862	2.22286	1.80917	2.73512	2.50636	1.71412	2.60231	2.0335	1.95064	1.91855
	3.08441	2.25179	1.8439	1.59287	2.91126	1.61983	2.28484	2.53427	2.13999	2.06936
	3.30449	1.73279	1.91367	2.35249	2.13166	2.08726	1.99812	2.60225	2.03131	2.15801
	2.19678	2.11373	1.55392	2.08834	3.02315	1.81958	2.12266	2.30711	2.35546	1.62027
	2.53772	1.82756	1.87596	2.20406	2.08959	1.74225	2.70582	1.89095	1.53648	1.80242
	2.60254	2.02151	1.89932	2.13551	2.92839	1.81573	1.9935	2.02539	1.73317	1.81247
	2.19036	1.9508	1.69935	3.07655	2.15264	1.63831	1.97594	2.30633	2.10954	1.90104
	2.84313	1.94905	1.58969	2.20255	2.31366	1.91733	2.04714	2.08624	2.1464	1.90645
	2.34053	1.69162	1.99817	2.01499	2.53791	1.8051	1.9352	2.16673	1.90111	2.05048
	2.67467	2.1204	1.56895	2.02088	2.42671	2.1321	2.24008	2.24057	1.53416	2.22831
	2.79337	1.9678	2.06138	2.03472	2.17269	1.77438	2.74061	2.38268	1.83122	1.82953
	2.17958	1.98589	2.28062	1.85033	2.11812	1.6336	2.00199	2.62462	2.20635	1.88776
	2.6361	1.85995	1.67842	2.61094	2.67645	2.04779	2.39342	2.0927	1.68364	1.91427
	1.7523	2.1659	1.63428	2.19042	2.6214	1.88267	2.25092	2.58736	2.5646	1.61369
	2.23266	1.72668	1.5457	1.71179	2.20609	1.64414	2.01742	2.05749	1.63819	1.80699
	2.06156	2.17935	1.75157	2.72007	2.48804	1.54186	2.15923	2.06256	1.72889	1.39855
	2.8027	1.86481	2.03583	1.79041	2.4675	1.57139	2.77293	2.3178	1.89034	2.0539
	1.84213	1.93134	1.75805	1.93736	2.47296	1.74611	2.05573	2.08223	1.66787	1.77555
	2.05763	1.94647	1.87257	1.76333	2.31629	1.54531	1.96334	2.36162	2.0959	2.34196
	3.42657	2.00394	2.16779	2.43667	2.49142	1.66178	2.15046	3.05558	1.6482	2.36443
	2.8201	1.97724	1.62664	1.96426	2.89267	1.981	2.82282	2.51279	1.71357	2.12879
	2.98936	2.05236	1.84278	2.25269	2.13886	1.92843	2.26139	2.09383	1.82694	2.15837
	1.98914	1.84052	1.58417	2.24569	2.06641	2.08084	2.71492	2.05955	1.73367	1.81261
	3.45933	2.0736	1.88725	2.13309	2.29678	1.60127	2.00213	2.00885	1.78323	2.07566
	2.09552	2.31363	2.1684	2.31006	2.16376	1.62596	2.02143	1.93471	2.06777	1.59404
	3.10468	1.9322	1.7328	2.34602	2.56977	1.88794	2.01914	2.09699	1.94888	1.85293
	2.91798	2.07095	2.46275	2.3124	2.97059	1.96558	2.51814	3.5921	1.69608	1.89362
	2.10995	1.9604	1.5508	2.24494	2.81584	2.0581	2.11446	2.04344	1.7664	1.89858
	2.05332	1.82301	1.69698	1.97391	2.75099	1.90525	1.95566	2.48935	1.70198	1.67028
	2.06146	1.91131	1.86103	2.90915	2.08294	1.93031	2.40518	2.88656	1.72429	2.00347
	2.02325	2.61886	2.22717	1.7829	2.14733	1.85365	1.99341	2.04449	1.99321	1.67859
	2.2511	2.64402	2.06489	1.85969	2.26695	1.78316	2.22668	2.57512	2.3831	2.0462
	2.2798	1.89255	1.71659	2.19154	2.39687	1.79403	2.25601	2.09181	1.908	1.58875
	2.38873	2.1082	2.12249	2.8657	2.00447	1.77509	2.71145	2.06036	1.83593	1.91913
	2.05359	1.8508	1.66986	1.94994	2.52266	1.79359	1.99371	2.00884	2.11454	1.67382
	2.6006	1.73716	1.7359	3.70385	2.58997	1.89913	2.0543	2.58644	1.94485	1.67562
	3.1405	1.88321	2.28114	2.41053	2.78515	2.00014	2.23081	2.12072	1.97816	1.51053
	1.89588	2.50538	1.76191	2.44157	2.86141	1.65181	2.18581	2.79402	2.50343	1.74358
	2.67486	1.77	1.83394	2.21776	3.13692	1.91142	2.02875	1.9729	1.78168	1.75711
	2.03798	1.73682	1.717	2.35445	2.61473	1.86096	2.68826	1.94619	1.58841	1.61933
	1.89141	1.72004	1.58197	2.66839	2.36409	1.79895	2.03178	2.00837	2.01387	2.05854
	2.16035	2.19693	1.95713	2.27162	2.02578	1.63335	1.97415	2.22304	1.83012	1.67485
	3.22375	1.85331	2.28233	2.3597	2.47749	1.88976	1.95739	1.97545	1.81283	1.64091
	2.0239	2.0981	1.6394	2.06905	2.34358	2.00837	2.44451	2.51527	1.90227	1.77645
	1.86003	2.10201	1.68329	1.95702	3.02097	1.71731	1.84754	2.1205	1.81172	1.75189
	3.37545	1.85349	1.79151	2.09856	3.04426	1.93626	2.30917	2.13667	1.70453	1.99068
	1.97097	2.18811	2.19485	1.88709	2.55731	1.62462	2.35581	1.97253	1.79862	2.32642
	1.97494	2.29016	2.06429	1.86745	2.7511	1.9262	1.97681	2.10188	1.82864	1.81213
	3.08872	2.03244	1.6342	2.03894	2.18731	1.90818	2.29563	2.27803	1.4907	2.24848
	1.86321	2.14482	1.8078	1.92485	3.16662	2.34957	1.9474	2.80014	1.81569	1.81231
	2.1443	2.27758	1.74281	2.2355	2.90542	1.88033	2.02271	2.07362	1.91515	2.09636
	2.31997	2.84923	1.81339	2.79731	2.08001	1.93779	1.94642	2.04779	1.81787	1.55109
	2.35882	2.17406	1.81644	2.76033	1.99481	1.69857	2.00462	2.13262	1.73696	2.36193
	2.12022	2.71737	2.0791	1.83937	2.48121	2.04874	2.04875	1.94716	1.73371	1.94715
	1.94644	2.44321	1.806	2.62041	2.74661	1.69525	2.06477	2.00404	1.6216	2.13237
	2.36071	2.2794	1.8106	1.92179	2.64004	1.90956	2.16321	2.00833	2.22361	1.83796
	1.83638	2.24401	1.66688	2.9055	2.08281	1.94255	2.2823	1.89536	1.61917	2.1626
	1.92958	2.04675	1.60243	1.90339	2.17657	2.56101	2.57033	2.11713	1.71221	1.52781
	2.05129	2.23386	1.89235	2.05024	2.33545	1.83278	1.92741	2.02671	1.82421	2.63113
	1.88058	1.66562	1.58825	1.93212	2.66922	1.80116	1.97083	2.03537	1.5701	2.20848
	2.04472	2.42058	1.63066	2.37216	2.65277	1.84862	2.09213	2.04497	1.72614	2.16208
	2.73826	2.06471	1.60636	2.75893	2.36847	2.36619	2.1818	2.06025	1.57967	1.73269
	2.07402	1.9971	1.55914	2.19681	2.10156	2.02278	3.04917	2.66712	2.09448	2.09418
	1.94696	2.18163	1.68487	2.01556	2.42901	1.89284	2.0815	2.12456	2.40275	1.92439
	2.05183	2.35231	1.77065	1.88808	2.69342	1.9598	2.95157	2.27932	1.57924	1.99941
	2.75013	2.03249	2.00021	2.12063	2.61483	1.9004	2.63046	2.01621	1.87504	2.11571
	1.92464	2.08311	1.72186	2.08711	3.41402	1.57273	2.46305	2.58747	1.8278	1.8977
	2.02886	1.81991	1.5509	1.81271	2.85244	1.91002	2.16493	2.10396	1.57113	1.93605
	2.47934	2.44615	1.59013	2.03829	2.36067	1.88964	2.16659	2.20399	2.02841	1.98319
	1.91185	2.12527	1.98638	1.97318	2.10506	1.75898	2.18551	1.98476	1.76327	2.1042
	2.04143	1.79485	1.83546	2.08586	1.88784	1.80919	2.43184	2.46482	1.76989	2.1719
	2.38272	2.11469	1.63369	2.01219	2.46939	1.61739	2.79103	2.00348	2.0258	1.73964
	3.13842	2.01655	1.72245	1.99758	2.37373	1.79943	2.40133	2.20441	1.6437	1.6095
	1.91145	2.27536	1.69788	2.2756	2.63776	1.91639	2.04913	1.98952	1.73936	2.09307
	2.07888	2.18522	1.79947	1.95552	2.15151	1.63	2.07564	2.41528	1.79853	1.81934
	2.12007	1.69444	1.68015	3.78833	2.4891	1.59755	1.94878	1.95801	1.58218	1.72706
	2.1138	1.92512	2.02192	2.58799	2.56012	1.66663	2.0516	2.12157	1.64949	1.55258
	2.51298	1.92139	1.78496	2.29594	2.60136	1.89893	2.09492	2.02179	1.66866	1.66131
	2.03785	1.99058	1.74907	1.99769	2.79898	1.87626	1.99569	2.35897	2.02438	1.70086
	2.17857	2.61682	1.92089	2.01395	2.07015	1.78352	3.27375	2.04855	1.70662	1.83631
	2.01386	1.90559	2.08935	2.3409	2.12222	1.89167	2.05365	1.90222	2.6193	1.69651
	2.0109	2.10174	1.92533	2.29394	2.19087	1.89644	2.17597	2.11279	1.75535	2.02697
	2.08276	1.9191	1.81951	2.5437	2.19851	1.85762	2.90581	2.2863	2.04043	1.8979
	3.80492	2.25628	1.63795	1.98714	2.51583	1.78676	2.38497	2.33403	1.96733	1.75036
	3.34493	2.29942	1.76214	2.07306	2.00732	1.77346	1.81361	1.96247	1.68822	1.40346
	2.06174	2.19191	1.68125	2.37401	2.69581	1.87937	2.589	2.12366	1.63161	1.61228
	2.47938	1.85754	1.64277	2.35204	2.16593	1.76435	1.99426	2.25015	1.88918	1.67426
	3.33986	2.33655	2.02775	1.94572	2.35701	1.84682	3.0548	2.4297	1.94834	1.77094
	2.0436	2.16506	1.97359	2.26856	3.00604	1.99337	2.32602	2.3711	1.52712	1.49243
	2.43248	2.46324	1.75193	1.97371	2.62225	1.93332	1.97299	2.34307	1.50023	1.7314
	2.24018	2.28474	1.7159	2.75481	2.14058	1.55498	2.68842	2.00512	2.23046	1.93453
	2.83149	2.34399	1.82108	2.30119	2.27685	1.58477	2.01811	2.04078	2.2379	1.67196
	2.03036	2.13006	1.85657	2.03497	2.08957	1.55118	2.04331	2.31032	1.9324	2.12721
	2.12302	2.10329	1.7425	1.91795	2.10706	2.13587	1.98086	2.04033	1.99315	1.60055
	2.44432	2.2798	1.92292	1.9369	2.28771	2.22361	1.95218	2.12911	1.74971	2.07912
	2.42459	2.19865	1.6649	2.739	2.32856	1.78365	1.99225	2.60183	1.89682	1.55188
	2.44414	1.85108	1.91682	1.97306	3.20725	1.51585	2.44153	2.24253	1.5513	1.67489
	2.7653	2.32229	1.81992	2.31003	2.10372	2.05483	1.91215	2.89776	1.55666	1.92386
	2.70194	2.34421	1.86887	1.97896	2.40635	2.0647	1.91911	2.925	1.79008	1.87174
	2.04436	2.20037	2.29743	3.13434	2.54919	1.68398	1.96254	2.26935	1.85679	1.89808
	2.83004	2.12057	2.02397	2.15778	2.21054	1.79437	2.73496	2.1787	2.54468	2.39058
	2.5232	2.17439	1.91924	2.53926	2.05518	1.68146	3.12436	2.18398	1.72495	2.05789
	2.49883	2.33336	1.87711	2.86667	2.09554	1.64257	2.09358	2.11712	1.94506	1.68475
	2.06638	1.85383	1.92463	2.35158	2.38504	1.88094	2.1988	2.45731	1.78112	1.5626
	2.08075	2.32617	1.8589	1.88767	2.59362	1.63761	2.73852	2.64882	2.10167	1.68154
	2.42207	2.22534	1.81089	1.94328	2.5774	2.58062	2.29935	2.13	1.76008	1.7821
	1.97047	1.8783	2.10287	2.43717	2.34332	1.77955	2.72516	2.18939	1.84603	1.6745
	2.3571	2.19769	1.97487	2.68404	2.80832	1.76452	2.12209	2.04015	1.64185	1.79009
	2.94196	2.37521	2.0157	2.46738	2.13853	1.69192	2.03447	2.20682	2.0997	1.90215
	2.11534	1.88565	1.82957	2.0855	2.19474	2.09405	2.07054	2.05031	1.76829	1.57699
	1.99194	2.2971	1.83015	2.46728	2.22972	1.79635	3.08011	2.76749	2.04223	1.50792
	2.01673	1.92358	1.72883	2.23309	2.08134	1.81352	2.67168	2.27365	1.82254	1.85099
	2.04649	2.62238	2.00137	1.99165	2.66875	1.91585	2.44276	1.99423	1.84829	2.09546
	3.17152	1.8667	1.88913	2.42005	2.4655	1.92576	3.04581	2.30867	1.65892	1.93982
	2.00831	2.18458	1.85438	2.45947	2.14171	2.29138	2.05536	2.45137	1.7734	2.06218
	2.70431	2.30091	1.84984	1.84164	2.33821	1.81969	2.13593	2.03199	1.74366	1.84116
	2.41903	2.23438	1.64728	2.00044	2.38054	1.90301	2.01613	2.10538	1.81932	1.76967
	3.2959	2.39622	1.8747	1.89704	2.9069	1.96741	2.02756	2.28998	1.84919	1.5516
	2.15141	2.25607	1.85254	2.08439	2.22359	1.58205	3.2742	1.93002	1.57949	1.94968
	2.02256	1.66542	1.63393	2.44714	2.46442	1.81931	2.07466	2.57355	1.76499	1.64123
	2.51504	2.14235	1.64545	1.98604	2.15464	1.8177	2.00076	2.0646	1.63303	1.71762
	2.0373	2.42403	1.66585	2.00148	2.36353	1.69985	2.2205	2.45568	1.94171	1.91851
	2.05428	1.95158	1.73165	2.53099	2.11844	2.12166	2.366	2.83727	1.95526	1.70182
	1.99925	2.19372	1.89568	3.08647	2.26514	1.6854	2.7871	2.23183	2.03237	1.5227
	3.32375	1.95081	1.64035	1.91694	2.05627	2.03728	2.05226	2.02063	1.76016	1.63266
	2.04591	2.0041	1.71906	2.19916	2.06166	1.6412	3.10394	2.33454	1.73995	1.76304
	2.16646	2.59927	1.90624	1.92541	2.14588	2.30136	2.02707	2.97526	1.88257	1.39709
	1.99548	2.15828	1.70898	1.83882	2.86352	2.01753	1.99425	2.12248	1.54227	1.77966
	2.37602	2.33988	1.85418	1.97735	2.04486	1.70357	2.36539	2.07195	1.76488	1.81721
	3.04093	2.20005	1.73983	2.26127	2.31396	1.61689	2.01617	2.01223	1.53956	1.78383
	2.1168	2.32293	1.83753	2.99394	2.21353	2.11079	2.16608	2.15772	1.53534	1.8925
	2.34996	1.97142	1.77068	2.1026	2.0813	1.83093	1.97786	2.37375	2.56453	1.93265
	2.78486	1.86432	1.76337	1.96833	2.29494	1.73913	2.42802	2.33434	1.99053	1.88346
	1.97735	2.10894	1.93984	2.03302	2.11936	1.45419	2.83849	2.74194	1.4628	1.9038
	2.03079	2.11927	1.91049	2.09013	2.28466	1.63844	2.16099	2.1788	2.18724	1.75385
	2.17089	2.2757	1.50733	1.93612	2.53987	1.85177	2.47673	2.10011	1.55141	1.70885
	2.59261	2.12738	1.95777	1.93887	2.73958	1.80335	3.17449	2.1155	2.09734	1.78083
	2.03902	1.79847	2.25817	2.68831	2.15013	2.45317	2.11437	2.3465	1.75683	1.59987
	2.10323	1.87699	1.87428	2.0957	2.21766	1.90297	2.08106	2.27609	1.98037	1.78507
	2.58307	2.36784	1.96677	2.26389	2.29803	1.94345	2.46934	2.09479	1.95178	1.85987
	2.04393	2.26544	1.96038	1.91705	2.20693	1.85637	2.41276	2.35591	2.2756	1.69112
	2.09205	2.00374	1.60981	2.46304	2.09165	1.86122	3.21641	2.75193	1.83901	1.87265
	2.06933	1.85547	1.8678	2.24124	3.15733	1.82558	2.23125	2.22824	1.68348	1.53731
	1.96592	2.19778	2.10784	2.41359	2.10857	1.82239	3.04324	2.60454	1.81195	1.9749
	2.08414	2.22142	1.82367	1.8041	2.87806	2.13437	2.5972	2.06202	1.59034	1.67143
	3.12916	2.1472	1.64597	2.35222	2.44827	1.79637	2.96818	2.22215	1.92596	1.88738
	2.16955	2.86103	1.76875	2.31605	2.7795	1.75407	2.64969	2.13834	1.78113	2.14415
	2.08585	2.27762	1.82164	2.3252	2.02447	1.7843	3.05537	2.41623	1.89753	1.95694
	2.26174	2.11308	1.89697	1.92715	2.25771	2.09682	2.6606	2.02472	1.92701	1.72924
	2.51538	2.44945	1.91295	2.00722	2.21095	1.92522	2.08681	2.08961	1.93269	2.07131
	2.32215	2.19328	1.75994	2.24427	2.33577	1.6572	2.05188	2.07111	1.67764	1.51097
	2.1952	1.92915	1.91034	2.57212	2.74503	1.94726	2.78251	2.11239	1.6815	1.83374
	2.08743	2.54315	1.68062	2.38888	2.7505	2.57042	2.18235	2.09764	1.96294	1.73527
	2.34891	2.25336	1.78935	2.00701	2.77939	1.89085	2.76771	2.15329	1.83756	2.01758
	2.16371	2.25096	1.76705	2.12931	2.0677	1.94144	2.55023	2.09845	1.64894	2.08749
	2.40512	1.92917	1.67111	2.80926	2.16732	1.71026	2.02857	2.06538	1.85496	2.37092
	2.98234	2.19486	1.9717	1.92322	2.1751	1.77461	2.0462	1.9923	1.5064	2.00059
	2.05278	2.28134	1.90309	2.7127	2.34487	2.51576	2.00542	2.16636	2.24076	2.07559
	1.94956	2.47582	1.85213	2.11575	2.15709	1.84391	2.21986	2.55338	1.55624	2.07232
	2.01951	2.22745	1.71834	1.92866	2.07439	2.00335	2.36952	2.73053	1.69918	1.76409
	2.31403	2.1477	1.64837	2.76755	2.58643	1.95932	2.18063	2.04636	1.77786	1.87377
	1.9807	2.31364	1.93876	1.95509	2.60476	1.81229	2.17731	2.49736	1.79076	1.92376
	2.39993	1.8239	1.66877	2.59481	2.39876	2.16725	2.04754	2.39075	1.54099	1.92671
	2.54488	1.89633	1.56792	2.39636	2.23832	1.96941	2.00146	2.06809	1.94579	1.8903
	1.99882	2.02972	1.80002	3.1927	2.13609	1.7463	2.56251	2.06083	2.05608	1.96131
	3.08969	2.16983	1.63865	2.09102	2.46939	2.00148	2.84915	2.17011	1.78748	1.82231
	2.27674	2.17925	1.71882	2.12399	2.19111	1.82119	2.78917	2.43548	1.7333	1.95712
	2.09293	2.03379	1.62553	1.86402	2.07556	1.55493	2.05176	2.05699	1.71167	2.39079
	2.1604	2.20613	1.94036	1.87556	2.38372	2.05773	2.0323	2.03408	1.55767	2.12032
	2.16195	2.16553	1.85376	2.11734	2.42846	2.05671	2.57518	1.90049	1.51184	1.77375
	2.13779	2.09166	1.96901	2.22242	2.64713	1.79143	2.44346	2.02236	1.67116	1.73429
	2.18878	2.63858	1.78467	1.7599	2.29379	2.04938	2.53885	2.13083	1.5469	1.94572
	2.57265	1.92266	2.07195	1.9207	2.46341	1.88367	1.96667	2.26756	1.57607	1.89006
	2.0142	2.2935	1.74699	2.21438	2.04086	1.89836	2.01515	2.11645	1.73869	1.4991
	2.71248	2.61952	1.64687	1.91838	2.40502	2.05948	2.11395	2.44487	1.71088	2.6788
	2.73412	2.30867	1.6575	2.02256	3.032	1.94693	2.68336	2.14571	2.0754	1.78825
	2.35079	2.05352	2.06786	1.93972	1.95403	2.05858	2.41011	2.25293	1.89438	1.56105
	2.6103	1.97155	1.65459	2.41385	2.67985	1.6724	2.0019	1.96517	1.94298	1.8429
	2.02802	2.19514	1.50787	2.40752	2.93362	1.96578	2.12387	2.02978	1.4557	2.03454
	2.10069	1.87996	1.66913	2.54539	2.3429	1.7303	2.30036	2.31618	2.7511	2.1807
	2.91118	2.14651	1.62167	1.87226	2.12727	1.87331	2.62663	2.35685	1.54079	1.82813
	2.18079	2.22893	1.93886	2.79314	2.51698	2.11406	2.10252	2.05292	1.88917	1.72508
	2.13765	1.80311	1.98313	1.86965	1.97394	1.97658	2.18339	2.0496	1.65992	1.61516
	2.54026	2.13446	2.04087	2.09874	2.88196	1.7514	2.0278	2.36619	2.08235	1.79694
	2.13158	2.14988	2.14361	2.66456	2.13541	2.00815	2.26783	2.07863	1.584	1.92131
	2.33847	1.90521	1.79393	2.21992	2.02331	1.69859	2.07743	2.11239	1.52963	1.76925
	2.0502	2.06295	1.98846	2.53939	2.18024	1.71234	2.81223	2.49031	1.59963	1.88625
	2.0984	2.03593	2.43535	2.00019	1.93979	2.22105	2.10115	2.09377	1.57946	1.72952
	2.57773	2.23105	1.78331	1.90087	1.89923	1.72329	2.66565	2.14835	1.64741	1.51647
	2.27946	2.21842	1.9002	2.07382	1.95178	1.87217	2.83795	1.97914	2.12282	1.81492
	1.99829	1.94335	1.87116	2.81317	1.99462	1.80714	2.11817	2.00988	1.64905	2.22259
	2.40951	2.42865	1.5895	2.89221	1.94477	1.85854	2.13812	2.5465	1.51135	1.87436
	3.19469	2.28096	2.09716	2.02317	2.69841	2.03566	2.68468	2.02089	2.33744	1.51299
	2.02401	2.09616	1.74058	1.88157	1.87338	1.85217	2.99194	2.06358	1.86499	1.92691
	2.27046	1.92174	1.53736	2.46006	1.98605	1.80792	2.00885	2.09524	1.74758	1.78603
	2.20087	1.87651	1.69551	1.65325	1.89155	1.78169	2.17486	2.07	1.66862	1.69167
	2.13069	2.16327	1.69146	1.69313	1.86159	1.81947	2.19681	2.0007	1.80092	1.79127
	2.39375	1.64646	1.68977	1.74951	1.98325	1.88916	2.31014	2.0117	1.66968	1.88347
	2.18168	2.199	1.68494	2.5399	2.1336	1.82344	2.02919	2.04201	1.7415	1.60484
	2.27692	2.12257	1.88525	1.8125	2.35851	1.63706	2.02424	2.66777	1.82826	1.85375
	2.08746	2.22374	1.78699	2.0456	1.93785	1.84641	2.43912	2.02182	1.78969	1.7155
	2.63402	1.85526	1.76414	1.68122	1.94101	1.71304	3.02481	2.00708	1.88392	1.85022
	3.18757	2.05342	1.80768	2.39433	2.04386	1.6606	2.00912	2.01208	1.67291	2.04116
	2.04832	2.33986	2.0352	1.57376	1.8751	1.72442	2.50973	2.35898	1.86379	1.7082
	2.09865	1.81388	1.82711	2.51218	1.97708	1.45875	2.14755	2.66313	1.6118	1.95511
	2.12487	1.91362	1.76392	1.57751	1.93974	1.64151	1.96458	2.04219	1.93477	2.10152
	3.03821	2.6683	1.72555	1.78101	2.14445	1.64473	2.74658	1.93057	1.7795	1.94933
	2.95915	2.0981	1.62534	2.41213	1.95127	1.81275	2.26355	2.21835	1.57569	2.05701
	2.94221	2.03651	1.86086	1.751	2.00734	1.84869	2.18837	2.04847	1.75975	1.7298
	2.12183	2.13952	1.60536	2.3845	2.00355	1.77956	2.13506	2.0327	1.8109	2.12379
	2.34134	1.80842	1.72042	2.29179	1.99368	1.71243	2.52469	1.95857	1.67679	2.27895
	2.14428	2.04058	1.91044	1.7103	2.51299	1.81637	2.1689	2.00624	1.67508	1.53938
	2.80889	1.91991	1.59858	1.77771	1.94223	1.90664	2.50549	2.0941	2.24859	2.0046
	2.6262	1.62323	1.85674	1.70932	2.49546	1.76583	2.19602	2.10754	1.59796	1.88434
	2.50503	1.7873	1.60023	2.29583	2.0459	1.68614	2.03076	3.20125	1.65319	1.69887
	2.23739	1.57484	1.75574	2.41469	2.00481	1.81939	2.3615	2.49686	1.82424	1.67153
	2.55747	2.05175	1.61934	2.33725	1.97084	2.04331	2.21376	2.00524	1.8166	1.52047
	2.9494	1.63922	1.66732	2.53241	2.05914	1.6536	2.10403	2.81429	1.7131	2.03741
	2.17687	2.51831	1.78069	1.81128	2.00009	1.65821	2.00541	2.12103	2.07525	1.71263
	2.1092	2.02377	1.87318	2.42575	2.41398	2.34962	2.0271	2.17205	1.65054	2.10947
	2.43766	2.08315	2.07669	1.72104	2.66127	1.82444	1.99561	2.33862	1.65039	1.69302
	2.09467	2.00007	2.09139	1.77285	1.95402	2.18432	2.5725	2.17486	1.7989	1.85541
	1.96785	2.17019	1.91553	1.85145	2.67557	1.87134	1.98632	2.39496	1.49466	2.37723
	2.07308	1.85695	1.74936	1.95915	2.39719	2.11674	3.25697	3.39822	1.66766	1.55784
	2.03736	2.02719	2.1236	1.8212	2.0731	1.84238	2.30431	2.26325	1.38249	1.57439
	2.0721	2.19762	1.82073	2.2499	1.94966	1.84181	1.9715	2.22959	1.90379	1.71206
	2.41058	1.91675	1.87783	1.68984	2.0811	2.07423	2.01639	1.98692	1.39948	1.92193
	2.33372	2.09898	2.05478	1.82373	2.04013	1.74367	2.18402	2.80079	1.60518	1.52883
	2.20031	1.87337	1.80092	2.3439	1.94532	2.04427	2.76007	2.27748	1.62721	2.1607
	2.57295	2.19108	2.54909	1.88091	2.1424	1.73945	2.05098	2.44522	1.66434	1.65638
	2.65185	1.8889	1.84871	1.64385	2.04484	1.79599	2.46025	3.34451	1.69007	1.96924
	2.14219	1.46971	1.66253	1.65189	2.19852	1.82694	1.99401	2.10351	2.04724	1.85953
	2.11545	2.04763	1.85718	1.85436	1.98983	1.87312	1.8591	2.18287	2.0638	2.51141
	2.44786	1.75932	1.87094	1.93368	2.02446	1.74178	2.31642	2.63475	1.55979	1.82908
	2.00105	1.97158	1.9982	2.3971	2.70514	1.80277	2.05958	2.03631	1.71692	1.96852
	2.01265	1.74176	1.99486	1.6895	2.00871	1.78049	2.66672	2.07941	2.2546	1.60736
	2.19178	2.48773	1.86599	1.76716	2.1387	1.64223	2.05937	2.30262	1.65644	1.75528
	2.38952	1.52245	2.19781	1.9409	2.66197	1.83317	2.19617	2.27565	1.64739	1.59302
	1.95694	1.53287	1.93179	1.67071	2.50209	1.70981	2.02535	2.24403	1.82905	1.66487
	3.2933	1.87376	2.06862	1.57015	2.0543	1.67933	2.00963	2.45207	1.80581	2.10489
	2.12598	2.06373	1.90991	1.56587	2.00164	1.68461	2.2039	2.06015	1.4532	1.95472
	1.96619	2.20474	1.95518	1.59711	2.68166	1.70539	2.15061	2.62273	1.50237	1.68552
	2.18478	2.27495	2.18187	2.21637	2.34414	1.61306	2.04604	2.42264	1.50699	1.91294
	1.8989	1.76641	1.76567	1.61606	1.92178	1.90666	2.07176	2.1151	1.73439	1.66907
	1.95776	2.45301	1.82679	2.23583	2.3818	2.71682	2.16533	2.05118	1.43758	2.33996
	2.88697	1.81803	1.90209	1.58619	1.92486	1.72361	2.29305	2.05164	1.48766	1.87516
	2.03747	2.39538	1.8234	2.40057	1.99989	1.86475	2.44754	2.3854	1.36441	1.60783
	2.0947	2.09222	1.79229	1.61859	1.93254	1.68182	2.21597	2.41907	1.39586	1.92035
	1.99805	2.09608	1.88512	2.25481	2.20715	1.94873	2.79826	2.14945	1.81974	1.81272
	3.27034	2.4536	1.76614	1.54508	2.24156	2.31254	2.04886	2.67012	1.40671	1.82272
	2.60031	2.25841	2.35785	2.71669	1.99955	1.75412	2.00274	2.27231	2.22409	1.69912
	2.24098	2.34154	1.87627	1.52934	2.20157	1.82797	2.07465	2.58548	2.1091	1.81746
	2.37476	2.58314	2.72449	1.52778	2.39784	1.83926	2.11981	2.31927	1.55004	2.14837
	2.24509	1.55549	1.74153	2.01666	2.46234	2.04668	2.04748	2.4509	1.77252	1.67392
	2.00273	2.11762	2.00355	1.53789	2.01429	2.03187	2.0108	2.30047	1.42336	1.93078
	2.03244	2.26424	2.25037	2.44983	2.10116	1.71608	2.64105	2.01599	1.34263	1.89319
	2.81258	1.6845	1.76667	1.44335	2.11347	1.78061	2.59292	2.21005	1.64199	1.74719
	2.0945	2.021	2.17177	2.19081	2.06147	1.73605	2.07853	1.98541	1.85158	1.97513
	2.17893	2.18815	1.93193	1.50903	2.08464	1.57597	2.0625	2.22813	1.6362	1.79181
	3.27071	2.26319	2.138	1.6143	2.01879	1.72525	2.63259	2.18071	1.99729	1.88482
	3.27987	1.61107	2.12761	2.73798	2.14209	1.9338	2.45298	2.49382	1.6345	1.69293
	2.21869	2.12416	1.81234	2.30682	2.06019	1.76616	2.56332	2.92509	1.51744	1.6743
	2.37874	2.17258	1.79503	2.41168	2.49031	1.86374	2.46158	1.98469	1.38839	2.15031
	2.6485	2.21197	1.97044	1.40962	2.35279	1.66249	2.00704	3.11658	1.71178	2.31151
	1.9908	1.8678	1.78013	1.51733	2.06919	1.81453	2.07076	1.96728	1.30669	2.04734
	3.27277	2.0487	1.55478	1.53135	2.1309	1.65802	2.45375	1.98848	1.78237	1.67075
	2.0731	2.10187	1.95914	1.49423	2.14918	1.80465	2.03528	1.86892	1.46482	1.71378
	2.54744	2.41128	2.14447	2.05061	2.30789	1.6135	2.19726	2.01141	1.76357	1.61807
	3.53527	2.06452	2.00368	2.10626	2.28755	1.67176	2.00078	1.83142	1.4818	1.70159
	2.80796	2.21125	1.96347	1.9093	2.2064	1.85896	2.08556	2.12721	1.47236	1.99312
	2.62712	1.58661	1.68337	1.57514	1.97748	1.743	2.06884	2.0684	1.64852	1.6188
	2.21574	2.11033	2.11403	1.49541	2.58197	1.69186	2.02261	2.87755	1.45999	1.84788
	2.74225	2.19439	1.8686	2.45159	2.04115	1.46383	2.02435	2.23467	1.73001	1.89033
	3.22873	2.33131	2.08766	1.42302	1.98669	2.07837	1.99861	2.08377	1.95715	1.59842
	3.3296	2.11342	1.8999	1.87613	2.49898	1.66584	2.153	2.4236	1.41188	1.54706
	2.83519	1.60439	1.70466	2.12943	2.15367	1.5105	2.02156	1.95471	1.73262	1.63385
	3.19602	2.2838	1.98588	1.5593	1.96087	1.59583	2.42196	2.3408	1.56086	1.87136
	1.94745	2.33881	2.15603	1.67199	2.02155	1.94597	2.0234	2.00188	1.83803	1.75388
	1.91072	2.41975	1.99878	2.36557	2.45364	1.69148	1.95307	1.93244	1.51755	2.02905
	2.73566	2.43627	1.90104	1.68334	2.0928	1.74287	2.17141	2.00468	1.41592	1.55914
	2.46628	2.28403	1.97772	1.38628	2.6252	1.7754	2.164	2.1304	1.81299	1.76621
	1.9288	2.11977	2.32166	1.57685	1.91435	1.62503	2.15306	1.99363	1.61337	1.8295
	2.3217	2.64895	1.97217	1.6984	1.97974	1.7483	2.07567	2.42662	1.69372	1.59839
	1.9316	2.42492	1.74274	1.42359	2.19824	1.66554	2.29977	2.23958	1.65724	1.87521
	2.93449	2.25019	1.79651	1.72974	2.18496	1.76313	4.22191	2.65319	1.40979	2.05437
	2.6147	2.21679	1.9085	2.31742	2.60827	1.74666	2.03003	2.05846	1.57953	1.9053
	2.41469	2.03592	2.31847	1.45055	1.99829	1.77674	2.97159	2.32519	1.98412	1.83205
	2.43831	2.2608	1.7344	1.48158	2.34751	1.87078	2.16782	2.24111	1.47994	1.82555
	2.85704	2.01001	1.94357	1.42142	2.16226	1.89602	2.51096	2.25271	1.62722	1.63393
	3.22522	2.3106	1.87912	1.84283	2.67407	1.71631	2.86448	2.29063	1.62039	1.95852
	2.30721	2.18054	1.7839	1.45173	2.01063	1.92544	2.25149	2.03544	1.87846	1.69747
	2.40795	2.36229	2.0252	1.37774	1.86485	1.69858	1.92317	2.64538	1.93379	1.63261
	1.92569	2.14223	1.99524	1.93138	1.90679	2.20187	2.13474	1.95453	2.47092	1.64624
	2.53351	2.46045	1.8219	2.87154	1.96183	1.77288	2.70618	2.31658	1.50401	2.41526
	2.96063	2.17938	1.80639	1.3701	1.84675	1.90508	2.92946	2.5797	1.97317	1.67558
	3.67202	1.89852	1.91806	1.3305	2.39469	1.85535	1.96915	2.39745	1.70638	1.81291
	2.96888	2.60463	1.68341	1.96391	2.83492	1.79219	1.94203	1.96148	1.74942	1.90139
	2.63967	2.2826	2.08544	1.71452	2.36391	1.56428	2.45848	2.49971	1.45866	2.14175
	2.04861	2.03677	1.81286	1.48969	2.22749	1.76348	2.41036	2.18457	1.9631	1.83939
	2.43117	1.95471	1.85943	1.40707	2.32475	2.07801	2.4755	2.09438	1.43589	1.84564
	3.23031	2.32289	1.70279	1.3233	2.04511	1.90754	2.05649	2.53672	1.66861	1.76255
	3.61666	2.09096	1.91284	2.03283	2.22123	1.8042	2.18216	2.46902	1.6222	2.29425
	1.82218	2.19174	1.75181	1.40466	2.50862	2.60587	2.03452	2.61365	1.85943	1.53741
	2.72984	2.12155	1.77267	1.45311	1.99987	1.91502	2.73087	2.0903	1.81227	2.06249
	2.44516	2.26041	1.94402	2.61774	2.22051	1.96246	2.10549	2.02271	1.61124	2.49908
	2.53297	2.27191	1.77552	2.08347	2.08553	1.8611	2.45059	2.46261	1.84278	1.70523
	2.65852	2.08116	1.85888	1.68427	2.637	2.0755	2.48153	2.02465	1.66867	1.60823
	1.92272	2.11024	1.73243	2.0625	2.84278	1.60667	2.3244	2.525	1.85295	1.84348
	1.93431	2.18646	1.62142	1.316	2.71789	1.79206	2.90002	2.26326	1.81508	2.0581
	2.1436	2.26426	1.95386	1.65831	1.95722	1.76149	2.74276	2.041	1.62501	1.71136
	2.52478	1.83688	2.03491	1.91511	2.28926	1.98543	2.01331	2.0407	1.56116	1.75847
	2.08313	1.92195	1.57869	1.66217	2.22408	1.90563	2.02892	1.91505	1.69781	1.80146
	2.65659	2.00393	1.76481	1.89896	2.05499	1.7143	1.9304	2.35113	1.6389	1.75782
	3.25933	1.86457	1.70058	1.66762	2.2822	1.72732	2.17585	2.63425	1.83592	1.83624
	3.24238	1.85251	1.54111	2.15491	2.66942	1.8066	2.23185	2.0664	1.47111	1.61888
	2.7321	1.60027	1.83895	1.66458	2.45344	1.55817	1.99904	2.54595	1.6898	1.72201
	1.96622	1.94521	1.66546	2.16517	2.26645	1.63131	2.0667	2.24456	1.86901	1.74627
	2.15987	1.83799	2.10045	1.68599	2.5627	1.77094	1.9702	2.56704	1.61335	1.97925
	3.09751	1.62758	1.72896	2.05589	2.36109	1.94519	2.6143	2.06039	1.74522	1.94255
	2.58784	2.36597	1.78757	1.61612	1.99055	1.59656	2.00757	2.04181	1.87357	2.53822
	3.61992	2.11308	1.58358	1.77879	2.29448	1.68388	2.17356	2.35939	1.70812	1.88946
	2.38562	2.31412	1.72264	1.36485	1.94279	1.82281	2.73082	1.8335	1.92451	2.11307
	2.15903	2.16044	1.65976	1.3521	2.37781	1.84762	2.15932	2.22319	1.99126	1.98843
	2.07929	1.95125	1.97687	1.74601	2.74396	2.0483	2.22969	2.13866	1.72322	1.53176
	2.64087	2.69264	1.7467	1.73312	2.15826	1.9366	1.95656	1.98802	2.18122	1.76432
	1.95999	2.09709	1.76306	2.18706	1.96117	1.72419	2.04108	2.10711	1.51468	1.6994
	3.1227	1.98845	1.61409	2.7144	1.90261	1.8758	1.99323	2.23143	1.60306	1.66461
	3.43818	1.91835	1.6819	2.55035	2.11866	1.83323	2.00005	2.08427	2.16642	1.72005
	2.11012	1.93694	1.67044	2.49657	2.06704	1.74603	1.98835	3.39908	1.77961	1.75205
	2.62462	2.2907	1.4871	2.26857	2.23594	1.55502	2.34787	2.92854	1.65099	2.08375
	2.09516	2.10517	1.61806	2.34146	1.96218	2.59172	3.01394	2.29732	1.71411	1.80789
	2.78427	2.35773	1.70523	2.02463	1.95345	2.12829	2.94441	2.35744	1.93623	1.73001
	1.84214	2.5254	1.84057	3.32871	2.10914	1.58486	3.23478	1.96795	2.18219	1.59256
	2.71926	2.18888	1.65512	2.44027	2.30353	1.75356	2.49467	2.33027	1.60011	2.05116
	2.10357	2.16945	1.73059	2.55727	1.94524	1.73766	2.21882	2.1422	1.83564	1.91342
	2.2641	1.6915	1.85772	1.91134	2.18467	1.94243	2.07998	1.94873	1.49416	1.90669
	2.87239	2.27506	2.07323	3.04408	1.89645	2.1877	2.54653	2.48772	1.56275	1.65213
	2.74172	2.02881	1.62576	2.19739	1.96023	2.02731	2.98592	2.11327	1.90533	1.97124
	2.91337	2.16681	1.65928	2.30144	2.44981	1.87928	3.00222	2.453	1.6129	1.69314
	2.80009	2.10987	1.73335	1.91068	2.54234	1.777	2.60783	2.33881	1.73189	2.18115
	2.13206	1.90589	1.78465	1.9046	1.97574	1.85993	2.4142	2.18014	1.79354	1.71131
	1.87586	2.20743	1.60398	1.84072	2.19252	2.1103	2.18957	2.03071	2.26712	2.40078
	2.32602	1.74114	1.59275	2.52301	1.99263	1.72286	2.07821	2.59208	1.50368	2.35865
	1.84162	2.00447	1.6524	1.92862	1.94746	1.913	1.96037	2.04634	2.10462	1.91421
	3.00894	1.96029	1.58033	2.24935	2.01909	2.02352	2.19093	1.99396	1.51934	2.20587
	2.06403	1.93243	2.12901	3.30755	1.991	1.64681	1.98049	2.08495	1.73987	1.6864
	2.03055	1.69279	1.83661	2.23367	1.99866	2.03395	2.43808	1.94341	1.58711	1.67798
	2.11776	2.27738	1.69679	2.2578	2.2879	2.01851	2.00637	1.92036	1.88773	1.93579
	3.18549	2.09285	1.59536	1.9146	3.6225	1.80895	3.13846	2.0976	1.59852	1.9675
	2.82489	2.02846	1.75885	2.493	2.25901	1.64636	1.91164	2.01111	1.63941	1.81037
	2.12968	2.2241	1.84361	2.24555	1.99153	2.14164	2.22201	2.10064	1.68119	1.76057
	2.01815	2.32584	1.98414	2.29515	2.3143	1.95624	2.31684	2.06305	1.67497	2.07151
	1.91323	2.0254	1.6525	2.25475	1.93018	1.6809	2.33028	2.02208	1.79863	1.71856
	2.34041	2.06857	1.64747	2.48238	2.10973	2.14393	2.24386	2.23183	1.71848	2.33757
	3.02931	2.05733	1.85055	2.16295	2.08789	1.70842	2.68178	2.08013	1.54372	1.93259
	2.33564	1.73706	1.64744	2.90729	1.91853	1.73998	2.22382	2.38424	1.57684	1.67788
	2.60194	1.84835	2.03628	2.71738	2.1386	1.8276	2.08757	1.97567	1.62503	1.80977
	2.55824	2.60648	1.82455	2.03255	1.98299	1.52293	3.12498	2.0139	1.73424	1.75567
	2.04674	2.23885	1.8153	1.92144	2.54633	1.52752	2.02358	1.96239	1.53657	1.9318
	1.95139	2.30212	1.97975	1.93702	2.18649	1.78402	2.03374	1.99583	1.75571	1.78761
	1.96187	1.88191	1.76048	3.62332	2.04399	1.59561	2.10761	2.05737	1.41768	1.66993
	3.17889	2.10066	1.645	1.95012	2.3585	1.8019	2.12683	1.99032	1.5372	1.75631
	2.35219	1.75705	1.63788	2.05104	1.90258	1.90264	2.54558	2.00894	1.46755	1.84797
	1.93306	1.93332	1.84229	1.90589	1.93572	1.75719	2.50154	2.37262	1.63361	1.98501
	2.00733	1.73315	1.68319	2.47958	2.27789	1.90441	1.9539	2.17096	1.41878	1.64047
	1.97062	1.73586	1.77116	2.98955	1.9708	1.5291	2.12076	1.94843	1.50386	1.99127
	2.48854	1.52474	1.76115	2.06508	1.88749	1.90135	2.07192	1.93844	1.46408	1.94082
	2.38907	2.00094	1.78218	1.8946	2.66275	1.90418	2.26858	1.93642	1.79161	1.67307
	2.37504	2.01535	1.61865	2.41477	1.97512	1.82484	2.03224	2.03533	1.49971	1.78463
	3.1892	1.98998	1.55503	1.83392	2.83688	1.70134	2.09203	2.66231	1.85168	1.67962
	1.99749	2.21326	2.08078	1.88788	2.01181	1.85017	1.95234	2.54555	2.11265	1.73902
	2.64975	1.76376	1.72855	2.04273	2.08266	1.9256	2.32184	2.11324	1.87939	1.69741
	2.64345	1.86267	1.46532	3.45328	2.42716	1.89662	2.53501	2.40233	1.73068	1.83244
	1.95345	1.86065	1.86069	2.84393	2.97359	2.0189	2.60052	1.9886	1.61749	1.86935
	2.10804	2.02041	1.88742	2.26625	2.28816	1.97685	2.61693	2.07007	1.93646	1.65682
	1.98219	2.2934	1.70907	2.6809	2.44321	1.59562	2.20733	1.99821	1.89308	1.91662
	2.2246	1.99022	1.78787	2.4897	1.82346	1.76373	2.0623	2.05944	2.00695	1.61351
	2.25657	2.06296	1.6762	2.11857	1.97547	1.64003	2.38934	2.01679	1.83127	1.98627
	2.16488	2.14071	1.81967	2.55603	3.10945	1.76332	1.94656	2.02615	1.95858	2.31438
	3.03534	2.11904	1.81245	3.02709	2.56012	2.07297	2.16101	2.30899	1.63298	1.51832
	2.26169	2.03142	2.08449	2.90988	2.4015	1.69871	2.58404	2.45677	1.90537	2.07542
	2.22108	2.24675	1.76816	2.74374	2.56067	1.77229	1.99775	2.01223	1.75918	1.71177
	2.96581	1.48266	1.81649	2.03896	1.8595	1.81381	2.29677	2.2103	1.81285	1.49718
	1.98464	1.98102	1.5866	1.99345	2.06334	1.80492	1.95269	1.97269	1.65432	2.26405
	2.13199	2.07146	1.75472	3.4108	2.14776	1.68792	1.91877	2.27958	1.79548	2.33699
	2.0872	2.01438	1.49962	2.33333	2.01404	1.53276	2.19437	2.18618	2.39772	1.79234
	2.06726	2.03462	1.82626	2.93119	2.05559	2.32508	2.39793	2.2627	1.68465	1.84593
	2.60465	1.91538	1.66561	2.17487	2.72957	1.6267	2.18712	2.01403	1.88976	2.25479
	2.59539	1.91925	1.93066	2.42744	2.60666	1.76732	2.05389	1.98822	1.91226	1.70387
	2.85056	1.98322	1.74641	2.36355	1.94236	1.84421	2.12251	2.02753	1.76942	1.46343
	3.06942	2.05388	1.92739	2.34434	1.92505	1.94663	2.04145	2.23796	1.68542	1.74024
	2.9051	1.932	2.20641	2.08646	2.03173	2.10206	2.00083	2.04873	1.76302	1.862
	2.46663	1.99464	1.57724	2.98544	2.64266	1.77792	2.51246	2.38671	1.5451	2.12445
	3.06858	2.06729	2.12571	1.82607	1.90707	1.65577	1.9283	2.08407	1.71553	1.66906
	2.15048	1.49293	1.96977	3.12792	1.82969	1.68627	2.08304	2.0706	1.67344	1.85509
	2.45412	1.64169	1.97674	3.32252	2.31783	1.67351	2.54681	1.95375	1.92074	1.84024
	2.62532	1.92371	1.87557	3.46695	2.63692	1.55861	2.28636	2.03926	2.1151	1.89
	2.13112	2.09549	1.9219	1.97985	1.89605	1.98642	2.1607	1.98952	2.43088	1.91336
	2.34923	1.60485	1.87346	2.26246	2.64337	1.9285	2.00245	1.96402	1.86758	1.66956
	2.61032	2.04413	1.6993	2.01071	2.07559	1.88659	2.06696	1.979	1.96148	1.78898
	2.19614	2.06113	1.94792	1.88781	2.77733	1.76706	2.09648	2.41232	1.77076	2.02455
	2.42053	1.92512	1.851	1.89984	2.24781	2.20892	2.69343	1.95522	1.93958	1.68847
	2.20001	1.86991	1.85198	2.05083	2.0865	1.96504	1.99002	2.74078	1.98296	1.63353
	3.25595	1.84094	1.99539	2.32053	2.49555	2.14744	1.96772	2.39684	1.89468	1.80039
	2.41415	2.09965	1.8577	2.16467	2.56061	2.03078	2.48889	2.08311	2.12013	1.76579
	2.94868	1.75407	1.72998	2.03808	2.65206	1.84555	1.97074	1.96676	2.04834	1.60488
	2.49618	2.23157	1.7731	1.93896	3.08406	1.51681	2.23478	1.95142	1.86447	1.96099
	2.67359	1.79741	1.79705	2.53348	2.55014	1.85551	2.04491	1.96067	2.04847	1.90675
	2.0474	2.01453	1.67579	1.89266	2.52395	1.90557	2.53532	2.11319	1.61407	1.61067
	2.06754	2.11085	2.0083	1.95529	2.37062	1.93499	1.99994	2.1041	1.60407	1.88138
	2.41262	1.66657	1.77941	1.94922	2.00144	2.40976	2.19966	2.43252	1.77078	2.37032
	3.64922	2.05892	1.69867	2.8841	2.58034	1.74219	2.05038	2.01002	2.02306	1.67574
	2.2254	1.73073	1.94237	2.17821	2.22413	2.08684	3.01347	2.08592	1.79934	1.64956
	2.5206	2.12034	1.71953	2.13298	2.93085	1.97833	2.04744	1.97535	1.76669	1.86557
	2.60848	1.77931	1.83508	2.26165	2.84219	2.09922	2.25385	2.20467	2.07824	1.75968
	2.66645	2.11106	1.94502	2.60452	2.79347	2.95028	2.87728	2.29474	2.00969	1.8596
	2.26873	1.97372	1.66438	2.25186	2.75725	1.96941	2.77382	1.97235	1.89977	1.79873
	1.99614	2.23125	2.00813	2.32029	2.39051	2.07012	2.20861	1.95665	1.73655	1.95494
	3.34454	2.20469	1.54404	2.33898	2.64783	1.87993	2.50742	2.41788	1.82048	1.51131
	2.19994	1.99209	1.72925	1.86945	2.13692	2.71257	2.05923	2.07626	1.89475	1.55843
	2.42145	2.07537	1.77689	1.90775	2.56984	2.23031	2.194	2.03499	2.02893	1.56975
	2.62088	2.06339	1.79339	1.9553	2.13447	2.08664	2.73428	2.06024	1.82268	1.78301
	2.20446	1.98613	1.85458	2.36156	2.03629	1.8378	2.00933	2.04585	1.62671	1.62211
	2.04783	2.08278	1.9746	2.39825	2.87503	1.97457	2.13325	2.57174	1.56428	1.53002
	2.31732	2.407	1.77747	1.85636	2.3992	1.8821	2.17458	2.07096	1.9381	2.15767
	2.01996	1.60846	1.76692	2.25474	2.59801	2.10209	2.25125	2.01012	1.98505	1.6703
	2.18642	1.93782	1.89528	2.34873	2.57231	1.75917	2.53161	2.24458	1.73181	1.9244
	2.52709	2.19453	1.9283	2.08206	2.34977	1.74749	2.14986	2.30111	1.82087	1.76493
	2.23447	1.86626	1.7058	2.2642	2.214	1.68434	1.93066	2.04383	1.86668	1.76913
	2.47572	2.2603	1.73274	2.05532	2.48685	2.01255	1.91807	2.32058	1.56733	1.7384
	2.2448	2.04042	1.68944	2.7106	2.55884	1.88904	1.98821	2.03277	1.91869	1.77463
	2.05571	2.21466	1.47603	2.43975	2.11642	2.0287	1.96843	2.07593	1.75957	1.53127
	2.4716	1.98418	1.48804	2.63693	2.85371	2.59278	1.95936	1.97738	2.22358	1.77607
	2.96184	1.57296	1.90744	2.02912	2.21127	2.32445	2.28735	1.97972	2.0311	2.04156
	2.56511	1.98846	1.85142	2.40492	2.50303	1.93612	2.07993	2.03068	2.02263	2.11535
[truncated: 4,489 more rows]

## Sheet: Figure 4
Figure 4A	SOD1G93A			SOD1A4V
	Control	BP2	BP2ΔCHIP	Control	BP2	BP2ΔCHIP
	11.0913	5.14167	9.41248	16.9843	7.72185	13.9839
	10.3294	4.93689	10.1099	19.6305	8.15176	14.7031
	20.5161	12.9027	17.9631	19.548	7.56665	16.1361
Figure 4B	SOD1
	SOD1G93A-EGFP	Control	BP2 (0.05µg)	BP2 (0.1µg)	BP2 (0.5µg)	BP2 (0.75µg)	BP2ΔCHIP (0.05µg)	BP2ΔCHIP (0.1µg)	BP2ΔCHIP (0.5µg)	BP2ΔCHIP (0.75µg)
	1890.32	2614.57	178.617	0	0	128.985	1095.81	779.788	1192.47	699.191
	1515.74	1498.86	436.122	142.619	50.8842	0	1391.13	1127.45	1624.5	768.345
	1490.32	2214.57	425.855	257.912	189.424	24.3412	895.81	1165.46	1563.82	893.521
	Hsp70
	SOD1G93A-EGFP	Control	BP2 (0.05µg)	BP2 (0.1µg)	BP2 (0.5µg)	BP2 (0.75µg)	BP2ΔCHIP(0.05µg)	BP2ΔCHIP(0.1µg)	BP2ΔCHIP(0.5µg)	BP2ΔCHIP(0.75µg)
	1393.71	2140.26	2048.24	1597.79	1504.37	1672.64	1013.98	1038.44	941.382	648.332
	300.311	916.101	887.513	755.001	731.439	1820.46	569.491	622.845	498.188	421.436
	700.311	1316.1	1287.51	1155	1131.44	1120.46	969.491	1022.85	898.188	821.436
Figure 4C	Control	BP2ΔCHIP	BP2	BP2ΔCHIP +5 uM MG132	BP2+5 uM MG132	BP2ΔCHIP +10 uM MG132	BP2+10 uM MG132
	10.2858	6.8808	3.61178	7.16514	7.46314	8.00357	9.15499
	11.6893	7.15081	4.21075	5.49466	6.32475	5.97543	11.2337
	10.9758	5.38181	3.14246	5.45687	6.23549	8.2954	8.26751
Figure 4D	Control	BP2ΔCHIP	BP2	BP2ΔCHIP+ 100nM Baf.A1	BP2 + 100nM Baf.A1	BP2ΔCHIP + 500nM Baf.A1	BP2 + 500nM Baf.A1
	10.2858	6.8808	3.61178	10.0723	6.38408	13.6067	8.89772
	11.6893	7.15081	4.21075	10.7733	4.88457	11.3097	5.61469
	10.9758	8.38181	3.14246	11.8335	5.71102	12.7371	7.84656

## Sheet: Figure 5
Figure 5B
Figure 5C	Brain	Spinal Cord
	0.15	0.012
	0.2	0.002
	0.13	0.004
Figure 5E	Age (d)	SOD1G93A/WT											SOD1G93A/mUbL
	51	100	100	100	100	100	100	100	100	100	100	100	100	100	100	100	100	100	100	100	100	100	100
	53	103	102	105	101	103	102	100	100	102	103	100	101	105	105	102	104	104	102	104	102	100	102
	55	104	104	107	102	105	108	101	102	106	105	102	102	107	107	103	103	107	108	107	103	102	103
	58	105	107	107	104	106	107	105	106	108	111	104	104	111	110	106	106	109	107	108	107	105	108
	60	107	109	106	105	110	108	105	106	109	115	104	106	111	112	107	107	114	108	113	107	106	110
	62	109	110	105	108	111	113	106	110	110	117	105	107	116	112	109	110	116	111	114	104	106	112
	65	109	115	109	110	111	112	107	108	114	118	106	110	116	115	110	112	120	113	118	109	110	114
	67	109	114	107	112	112	112	109	110	116	119	106	113	120	117	113	112	122	115	120	113	113	117
	69	112	117	116	115	114	115	111	113	115	122	109	114	122	119	113	114	124	118	122	115	115	117
	72	113	120	112	115	114	118	110	114	117	123	111	115	124	120	117	116	126	122	125	115	115	119
	74	114	118	114	117	114	117	111	116	118	124	110	115	125	120	117	116	127	122	127	116	115	120
	76	115	119	115	119	117	121	110	115	120	124	111	118	125	120	120	118	130	122	129	117	116	121
	79	117	121	114	120	116	120	110	116	121	125	112	118	125	122	122	120	134	123	128	116	119	122
	81	117	124	119	121	117	117	109	115	122	129	111	118	129	123	124	123	134	123	129	116	117	123
	83	118	123	118	121	119	122	111	116	123	125	112	120	129	123	124	122	135	125	130	116	121	121
	86	117	124	119	123	120	119	110	118	122	129	112	121	131	124	126	122	137	126	131	115	120	126
	88	119	122	123	121	119	120	111	118	123	128	113	120	133	126	129	127	137	124	131	117	121	124
	90	118	123	119	121	120	120	110	118	121	128	112	123	133	123	128	124	137	126	133	113	120	125
	93	117	126	120	121	120	120	110	116	124	133	114	124	134	125	129	125	139	126	133	117	123	126
	95	115	125	120	122	121	119	112	118	123	132	116	123	135	126	129	124	140	125	133	119	123	129
	97	119	123	122	124	120	121	113	118	124	133	115	124	130	125	131	127	141	127	136	118	125	130
	100	117	129	121	125	122	121	114	118	123	135	117	122	138	126	133	126	141	129	139	119	126	131
	102	117	130	121	123	120	121	115	120	125	136	120	121	138	126	135	127	142	127	138	122	127	131
	104	116	130	122	124	123	123	114	120	123	124	121	122	138	126	135	128	142	128	138	122	127	130
	107	116	131	123	126	122	125	116	120	125	138	121	123	138	127	135	128	145	129	137	122	128	130
	109	117	131	126	127	124	125	117	122	125	137	122	123	139	126	137	129	145	128	136	122	129	129
	111	118	134	126	130	123	126	113	120	123	139	123	122	140	128	136	131	146	132	141	121	129	134
	114	116	133	126	129	125	127	118	124	126	140	124	123	137	129	136	131	146	133	140	123	130	134
	116	117	132	126	132	124	127	119	126	128	136	121	123	138	129	134	133	147	134	139	124	131	131
	118	117	132	127	133	127	125	119	125	127	137	122	125	139	129	134	133	148	134	139	123	129	132
	121	116	134	126	132	124	124	118	125	130	136	122	124	141	130	137	134	148	135	137	126	130	131
	123	114	131	126	132	123	122	115	123	129	138	122	123	141	131	136	133	149	134	134	125	128	132
	125	116	131	124	131	126	123	115	124	130	136	122	125	141	132	137	135	149	133	138	124	127	131
	128	115	131	125	130	122	124	115	125	130	135	123	124	141	130	136	133	146	132	136	126	130	128
	130	116	130	119	131	122	123	114	121	127	134	124	122	138	129	135	133	145	129	138	124	127	129
	132	115	130	124	129	124	123	115	119	128	135	121	123	138	127	134	132	148	130	134	123	127	128
	135	116	132	122	131	124	119	114	119	126	133	123	124	142	128	136	132	146	125	133	121	126	130
	137	113	129	118	128	123	122	114	119	126	136	123	121	139	127	136	130	142	126	133	120	126	131
	139	111	129	119	132	121	121	112	115	125	131	122	122	139	125	134	128	147	124	132	115	126	128
	142	110	130	118	128	121	120	113	114	123	133	123	121	140	124	133	127	145	123	131	118	125	127
	144	109	127	114	130	121	118	111	112	120	130	124	120	139	123	132	126	142	119	128	112	125	121
	146	106	128	107	130	120	119	111	111	119	126	122	120	139	122	133	128	144	116	127	111	123	123
	149	105	126	108	128	116	117	112	112	119	132	123	120	135	123	131	129	142	112	124	111	123	124
	151	104	127	108	127	116	117	111	109	116	126	122	117	137	121	128	126	141	113	122	106	120	121
	153	102	127	108	127	115	116	107	106	116	128	121	118	138	119	127	124	140	110	124	104	123	125
	156	100	124	108	124	113	115	109	103	112	128	117	116	135	120	128	124	139	106	118	103	119	126
	158	100	122	108	122	105	114	105	103	113	123	117	113	132	116	123	117	136	106	116	103	118	123
	160	100	122	108	121	106	110	103	103	110	118	117	107	134	113	122	118	137	106	118	103	115	123
	163	100	122	108	121	102	111	100	103	110	120	118	110	134	111	122	118	132	106	114	103	115	121
	165	100	117	108	121	102	106	104	103	108	120	111	103	131	107	118	113	133	106	114	103	112	123
	167	100	116	108	119	102	103	98	103	108	117	110	99	130	105	116	113	132	106	114	103	110	117
	170	100	116	108	119	102	103	98	103	108	117	109	99	128	105	114	111	130	106	114	103	107	116
	172	100	115	108	116	102	103	98	103	108	117	105	99	126	105	112	107	127	106	114	103	105	110
	174	100	111	108	114	102	103	98	103	108	117	107	99	125	105	111	107	125	106	114	103	105	110
	177	100	111	108	114	102	103	98	103	108	117	102	99	124	105	111	107	124	106	114	103	105	110
	179	100	109	108	111	102	103	98	103	108	117	100	99	121	105	111	107	120	106	114	103	105	110
	181	100	109	108	109	102	103	98	103	108	117	97	99	121	105	111	107	120	106	114	103	105	110
	184	100	109	108	107	102	103	98	103	108	117	97	99	117	105	111	107	120	106	114	103	105	110
	186	100	109	108	108	102	103	98	103	108	117	97	99	114	105	111	107	120	106	114	103	105	110
	188	100	109	108	108	102	103	98	103	108	117	97	99	116	105	111	107	120	106	114	103	105	110
	191	100	109	108	108	102	103	98	103	108	117	97	99	116	105	111	107	120	106	114	103	105	110
	193	100	109	108	108	102	103	98	103	108	117	97	99	116	105	111	107	120	106	114	103	105	110
	195	100	109	108	108	102	103	98	103	108	117	97	99	116	105	111	107	120	106	114	103	105	110
Figure 5F	Age (d)	SOD1G93A/WT										SOD1G93A/mUbL
	50	100	100	100	100	100	100	100	100	100	100	100	100	100	100	100	100	100	100	100	100	100	100
	53	104	102	104	100	101	101	106	98	104	99	108	102	109	105	102	102	101	102	98	102	100	98
	55	108	105	104	99	99	107	102	101	101	102	107	103	107	104	104	102	105	105	101	103	103	103
	58	110	105	107	106	105	106	106	102	106	105	109	101	107	109	105	102	110	110	102	108	107	103
	60	114	108	109	101	100	106	106	103	103	106	111	102	110	108	107	102	108	110	102	106	105	107
	62	114	105	107	106	107	110	108	103	106	106	113	103	112	112	102	106	111	110	104	112	105	104
	65	117	110	110	107	104	109	110	107	103	107	117	106	114	110	109	106	112	114	105	112	108	107
	67	116	107	113	107	108	111	112	105	109	106	119	104	113	113	109	108	112	116	104	118	109	108
	69	117	111	113	109	106	111	113	104	107	106	123	103	115	114	110	112	115	114	104	113	109	108
	72	120	111	118	109	110	114	110	107	112	105	123	109	118	116	114	109	114	122	103	118	113	106
	74	117	112	115	111	109	114	114	107	110	109	121	109	119	115	111	111	117	118	104	115	111	109
	76	118	112	120	114	113	116	109	107	113	104	120	109	119	118	115	109	115	114	104	116	107	106
	79	115	113	120	115	110	117	114	106	114	111	124	108	122	117	116	115	117	122	107	113	110	109
	81	123	113	124	114	103	118	113	108	111	108	121	112	124	121	118	111	115	121	105	114	109	107
	83	119	114	123	116	110	118	111	110	116	110	121	115	124	119	118	114	114	118	104	115	111	106
	86	120	119	123	117	114	119	112	107	112	110	121	117	127	120	121	115	117	122	105	114	109	113
	88	118	122	122	118	113	119	116	108	118	118	122	115	128	122	119	115	118	121	106	114	113	116
	90	124	120	124	120	113	120	114	107	116	119	123	113	129	119	120	113	120	123	106	118	110	119
	93	118	118	126	118	116	122	117	107	117	116	122	111	125	124	120	117	120	122	107	114	113	114
	95	121	115	123	116	116	120	114	114	117	116	122	108	127	124	121	114	121	122	111	121	111	111
	97	120	119	125	122	115	118	118	110	120	119	123	111	131	125	121	113	120	120	108	119	115	106
	100	122	119	126	118	116	122	115	110	117	116	123	113	131	122	121	117	121	127	110	121	112	110
	102	124	120	128	122	119	121	120	111	122	122	127	119	130	129	121	112	118	126	111	121	112	108
	104	125	121	124	124	119	126	117	110	116	119	127	119	130	129	123	116	122	126	111	121	112	113
	107	123	122	126	122	123	115	120	111	119	125	129	118	131	130	125	115	119	127	111	123	113	112
	109	121	125	129	123	120	127	120	116	117	123	129	118	130	130	125	117	122	122	111	121	119	115
	111	124	124	127	120	123	125	123	112	121	129	127	119	135	130	128	115	123	124	114	121	120	114
	114	123	127	132	118	119	130	124	115	121	122	127	120	133	126	126	120	125	124	111	121	120	118
	116	128	125	129	120	123	128	125	112	121	125	127	116	131	127	126	118	125	125	109	122	118	116
	118	125	122	135	119	118	130	123	114	122	120	129	116	132	127	129	123	127	128	109	123	115	116
	121	128	127	131	123	120	126	124	113	122	123	124	117	132	128	128	122	126	125	107	121	120	113
	123	125	123	130	122	117	127	122	116	128	118	125	118	136	127	128	117	127	128	110	119	117	117
	125	127	125	133	124	119	124	120	112	124	123	130	123	136	130	126	121	124	126	108	121	118	112
	128	129	120	129	121	120	125	120	114	127	124	132	124	136	129	125	118	123	132	109	115	114	114
	130	124	120	131	122	121	126	116	113	125	122	128	124	134	130	123	119	125	127	108	120	119	113
	132	126	124	130	124	124	123	118	110	126	122	129	120	131	130	128	119	125	131	106	120	119	113
	135	128	118	127	121	121	124	119	113	122	121	132	114	133	126	125	120	124	125	108	119	118	117
	137	124	121	130	121	121	121	117	108	125	124	135	109	131	128	123	117	119	132	107	112	110	113
	139	121	122	127	124	118	123	115	110	122	119	133	116	132	126	122	118	121	127	108	113	113	111
	142	125	125	126	123	123	119	109	103	125	124	127	116	129	127	121	116	119	125	107	112	110	109
	144	121	120	127	123	116	122	111	103	117	118	121	112	125	124	122	116	120	125	105	111	111	110
	146	123	117	127	116	117	120	101	99	120	122	123	112	126	125	123	115	119	128	105	108	106	104
	149	118	120	124	118	110	117	112	100	122	118	117	109	125	124	119	114	117	122	105	106	111	106
	151	119	118	124	116	111	117	101	100	121	117	125	110	125	122	120	113	115	124	104	106	109	103
	153	120	121	124	117	107	117	101	100	117	110	128	108	119	121	118	115	121	125	99	102	102	96
	156	120	123	122	114	111	113	101	100	117	108	130	110	118	123	116	111	113	125	99	102	103	96
	158	120	123	123	114	100	111	101	100	118	107	130	107	113	123	116	111	115	123	97	102	100	89
	160	108	123	123	118	100	116	101	100	111	107	127	107	113	123	119	110	112	129	96	102	92	89
	163	115	121	120	112	100	108	101	100	116	107	120	111	113	118	110	108	105	122	93	102	92	89
	165	110	111	120	111	100	106	101	100	111	107	125	111	113	116	108	104	105	121	92	102	92	89
	167	108	113	122	108	100	106	101	100	103	107	117	109	113	116	106	104	105	124	90	102	92	89
	170	109	109	116	106	100	106	101	100	105	107	121	109	113	116	106	99	105	118	90	102	92	89
	172	105	109	115	102	100	106	101	100	98	107	117	104	113	115	106	99	105	119	90	102	92	89
	174	104	108	117	106	100	106	101	100	98	107	112	103	113	111	106	99	105	112	90	102	92	89
	177	104	106	113	102	100	106	101	100	98	107	115	102	113	113	106	99	105	111	90	102	92	89
	179	104	108	111	102	100	106	101	100	98	107	112	103	113	107	106	99	105	114	90	102	92	89
	181	104	105	109	102	100	106	101	100	98	107	111	98	113	108	106	99	105	106	90	102	92	89
	184	104	101	109	102	100	106	101	100	98	107	110	98	113	107	106	99	105	106	90	102	92	89
	186	104	101	109	102	100	106	101	100	98	107	109	98	113	103	106	99	105	106	90	102	92	89
	188	104	101	109	102	100	106	101	100	98	107	109	98	113	103	106	99	105	106	90	102	92	89
	191	104	101	109	102	100	106	101	100	98	107	109	98	113	103	106	99	105	106	90	102	92	89
	193	104	101	109	102	100	106	101	100	98	107	109	98	113	103	106	99	105	106	90	102	92	89
	195	104	101	109	102	100	106	101	100	98	107	109	98	113	103	106	99	105	106	90	102	92	89
Figure 5G	Age (d)	SOD1G93A/WT											SOD1G93A/mUbL
	57	55.95	150.75	73.65	86.25	7.15	83.55	81.85	36.45	69.65	37.9	54.9	95.9	97.5	31.3	108.8	117.55	52.7	36.05	82.55	61	86.8	51.65
	64	41.65	158.7	50.25	58.2	6.65	94.25	79.6	44.25	47.85	26.45	50.4	66.15	76.4	65.35	65.2	87.4	69.55	80.25	61.4	61.5	55.95	20.75
	71	50.25	124.7	48.55	61.6	10.95	80.15	86.3	47.5	28.45	24.35	36.65	104.7	20.1	78.55	75.7	118.85	40.65	25.8	24.25	41.85	61.85	48.85
	78	50.15	106.8	44.55	33	7.5	72	50.05	43.8	42.15	51.7	38.1	59.15	9.45	73.15	110.7	67.85	50.35	82.6	12.45	47.9	74.55	66.05
	85	31.75	61	29.2	13.5	5.75	32.3	84.05	54.95	33.7	56.65	15.65	70.45	11.5	53.1	73	45.05	43.4	49.1	40.45	51.4	106.8	75.1
	92	12.6	63.1	36.35	10.05	10.2	54.55	59.3	37.95	49.45	24.4	24	71.4	20.7	83.5	78.25	55.05	42.25	47.2	34.25	51.1	64.3	72.2
	99	17.85	81.45	43.25	5.15	10.25	45.35	58.95	29.35	24.75	17.45	34.4	54.4	23.95	49.7	69	57.35	28.85	53.35	39.85	40.6	67.15	73.25
	106	31.7	43.4	29.85	19.8	13.6	42	56.75	30.2	28.4	23.85	53.1	36.85	20.75	45.2	50.45	68.35	13.95	61.75	48.1	47.95	52.75	99.3
	113	15.3	59.45	42.85	6.7	0	41.55	65.3	20	35.1	11.35	47.7	38.4	16.55	50.15	61.25	78.65	11.35	28.15	42.8	43.25	55.95	61.25
	120	25.3	63.3	52.85	12.85	20.5	65.8	37.45	25.65	10.3	20.15	25.3	47.05	23.4	63.1	47.65	42.95	16.35	47.5	57.3	25.8	43.35	63.8
	127	16.15	53.3	31.4	5.75	11.55	40.55	43.65	17.25	23.1	59.1	25.85	41.1	26	47.05	38.65	44.85	20.05	69.35	39.75	42.8	16	80.9
	134	32	46.85	28.85	17.15	7.65	63.45	62.05	19	33.45	45.7	12.85	51	10.35	30.65	62.95	31.45	32.25	51.8	8.15	15.6	35.6	45.6
	141	17	54.85	11	14.2	10.2	56.9	44.7	6.3	40.65	10	12.25	21.5	10.45	40.65	37.55	39.8	19.35	12.95	9	30.9	24.7	81.25
	148	7.7	58.85	11	27.7	12.05	51.15	32.5	2.8	11.15	47.5	7.95	28.4	27.1	29.1	35.55	19.1	18	9.85	8.8	6.9	13.05	50.05
	155	7.7	36.9	11	16.6	6.4	27.2	21.05	2.8	8.7	10.15	16.7	12.7	40.95	27.05	15.95	15.6	11.4	9.85	13.6	6.9	35.5	47.1
	162	7.7	29.1	11	2.9	6.4	12.95	6.25	2.8	9.2	10.7	15.8	12.7	31.85	27.95	26.15	3.2	8.75	9.85	13.6	6.9	26.25	22.2
	169	7.7	24.1	11	0	6.4	12.95	6.25	2.8	9.2	10.7	17.65	12.7	17.4	27.95	10.8	3.2	8.9	9.85	13.6	6.9	11.2	22.2
	176	7.7	2.6	11	8.55	6.4	12.95	6.25	2.8	9.2	10.7	17.65	12.7	13.4	27.95	10.8	3.2	6.45	9.85	13.6	6.9	11.2	22.2
	183	7.7	2.6	11	6.6	6.4	12.95	6.25	2.8	9.2	10.7	17.65	12.7	19.3	27.95	10.8	3.2	6.45	9.85	13.6	6.9	11.2	22.2
	190	7.7	2.6	11	6.6	6.4	12.95	6.25	2.8	9.2	10.7	17.65	12.7	19.3	27.95	10.8	3.2	6.45	9.85	13.6	6.9	11.2	22.2
Figure 5H	Age (d)	SOD1G93A/WT										SOD1G93A/mUbL
	57	80.35	76.05	92	118.3	53.15	61.85	57.05	7.95	108.5	125.2	169.1	44.5	41.05	44.25	35.8	59.4	44.75	77.5	38	98.9	43.7	40.3
	64	69.95	105.9	56	69.6	31.75	66.3	27	44.45	156.55	66.15	82.9	78.7	34.35	41.45	37.45	93.3	113.05	53.5	75.55	44.15	19.5	30.9
	71	45.3	103.55	61.05	25.2	18.2	33.9	42.75	16.7	133.8	100.85	76.2	46.45	26.35	42.45	16.8	74.3	70.25	72.2	32.7	51.45	54.45	15.7
	78	72.25	113.9	101.25	30.4	24.95	31.55	36.75	22.25	75.9	91.2	79.35	16	24.25	49.55	17.35	56.55	90.5	44.25	43.7	45.55	41.05	7.65
	85	56.2	90.9	46.65	32	30.3	28.9	21.6	27.85	65.8	88.9	58.05	48.4	29.15	37.5	26.3	76.1	58.55	34	38.8	42.45	37.75	7.7
	92	26.5	69.05	80.35	60.35	41.7	46.55	19.55	14.45	98	52.55	38.65	44.95	13	50.9	7.25	87.15	69.75	56.1	17.05	26.3	17.55	15
	99	50.8	79.45	48.45	11.5	23.95	42.65	17.2	40.65	70.85	78.65	47.7	11	22.9	53.1	57.45	79.15	46.9	28.65	23.25	40.1	20.35	25.35
	106	25.15	68.05	35.3	22.05	7.35	66	12.2	13.85	95.1	79.9	54.75	13.85	17.6	13.7	7.05	56.5	52.4	66.85	55.2	28	17.4	26
	113	5.8	50.6	52.9	31.25	17.4	38.7	41.05	9.5	93.75	70.6	33.4	8.5	12.45	52.25	0	80.6	49.6	45.5	22.3	18.5	14.7	9.95
	120	27.45	79.9	33.3	40.9	21.35	28.9	24.1	30	99.3	99.55	59.85	17.25	6.65	42.35	42.7	50.5	31.6	61.4	19.35	32.35	10.35	35.15
	127	8.55	79.6	56.9	30.85	19.5	54.3	18.75	36.1	69.8	58.1	30.25	16.6	6.6	57.45	36.9	56.65	54.05	86.55	13.5	14.15	10.8	7.6
	134	6.5	47.1	49.1	32.75	11.75	40.05	14.45	14.3	67.3	40.95	38.65	13.8	10.8	61.05	35.65	17.65	18.25	59.9	44.55	7.45	14.6	11.85
	141	27.8	55.15	49.65	40.85	56.75	29.7	10.15	2.55	57.6	47.4	7.45	19.15	20.3	57.15	13.15	15.25	51.85	52.8	26.6	13.35	2.85	23.4
	148	20	44.35	43.5	36.25	18	15.3	6.15	3.35	18	28.55	45.95	17.5	11.65	30.75	17.85	8.65	11.05	49.65	49.3	13.35	13.55	15.65
	155	31.45	70.3	58.95	28.3	7.15	37	6.15	3.35	23.4	10.25	55.5	18.1	8.9	24.9	11.35	33.9	6.1	67.4	17.25	13.35	5	15.65
	162	22.55	59.15	47.8	25.8	7.15	12.4	6.15	3.35	10.75	10.25	37.25	12.4	8.9	14.85	3.1	0	6.1	39.1	10.7	13.35	5	15.65
	169	15.2	59.7	18.1	13.85	7.15	12.4	6.15	3.35	3.05	10.25	55	21.25	8.9	19.5	3.1	2.9	6.1	38	10.7	13.35	5	15.65
	176	15.2	30.8	15	5.65	7.15	12.4	6.15	3.35	3.05	10.25	31.65	8.55	8.9	16.1	3.1	2.9	6.1	9.7	10.7	13.35	5	15.65
	183	15.2	5.55	15	5.65	7.15	12.4	6.15	3.35	3.05	10.25	12.25	8.55	8.9	9.4	3.1	2.9	6.1	9.7	10.7	13.35	5	15.65
	190	15.2	5.55	15	5.65	7.15	12.4	6.15	3.35	3.05	10.25	12.25	8.55	8.9	9.4	3.1	2.9	6.1	9.7	10.7	13.35	5	15.65
Figure 5I	Age (d)	SOD1G93A/WT											SOD1G93A/mUbL
	51	0	0	0	0	0	0	0	0	0	0	0	0	0	0	0	0	0	0	0	0	0	0
	53	0	0	0	0	0	0	0	0	0	0	0	0	0	0	0	0	0	0	0	0	0	0
	55	0	0	0	0	0	0	0	0	0	0	0	0	0	0	0	0	0	0	0	0	0	0
	58	0	0	0	0	0	0	0	0	0	0	0	0	0	0	0	0	0	0	0	0	0	0
	60	0	0	0	0	0	1	0	0	0	0	0	0	0	0	0	0	0	0	0	0	0	0
	62	0	0	0	0	0	1	1	0	1	0	0	0	0	0	0	0	0	0	0	0	0	0
	65	0	0	0	0	0	1	1	0	1	0	0	0	0	0	0	0	0	1	1	0	1	0
	67	0	0	0	0	0	1	1	0	1	0	0	0	0	0	1	0	0	1	1	0	1	0
	69	0	0	0	0	0	1	1	0	1	0	0	0	0	0	1	0	0	1	1	0	1	0
	72	0	0	0	0	0	1	1	0	1	0	1	0	0	0	1	0	0	1	1	0	1	0
	74	0	0	0	0	0	1	1	0	1	0	1	0	0	0	1	0	0	1	1	0	1	0
	76	0	0	0	0	0	1	1	0	1	0	1	0	0	0	1	0	0	1	1	0	1	1
	79	0	0	0	0	0	1	1	1	1	0	1	0	1	0	1	0	0	1	1	0	1	1
	81	0	0	0	0	0	1	1	1	1	0	1	0	1	0	1	0	0	1	1	0	1	1
	83	0	0	0	0	0	1	1	1	1	0	1	0	1	0	1	0	0	1	1	0	1	1
	86	0	0	0	0	0	1	1	1	1	0	1	0	1	0	1	0	0	1	1	1	1	1
	88	0	0	1	0	0	1	1	1	1	0	1	0	1	0	1	0	0	1	1	1	1	1
	90	0	0	1	0	1	1	1	1	1	0	1	0	1	0	1	0	0	1	1	1	1	1
	93	0	0	1	0	1	1	1	1	1	0	1	0	1	0	1	1	0	1	1	1	1	1
	95	0	0	1	0	1	1	1	1	1	0	1	0	1	0	1	1	0	1	1	1	1	1
	97	0	0	1	0	1	1	1	1	1	0	1	0	1	0	1	1	0	1	1	1	1	1
	100	0	0	1	0	1	1	1	1	1	0	1	1	1	0	1	1	0	1	1	1	1	1
	102	1	0	1	1	1	1	1	1	1	0	1	1	1	0	1	1	0	1	1	1	1	1
	104	1	0	1	1	1	1	1	1	1	0	1	1	1	0	1	1	0	1	1	1	1	1
	107	1	0	1	1	1	1	1	1	1	0	1	1	1	0	1	1	0	1	1	1	1	1
	109	1	1	1	1	1	1	1	1	1	0	1	1	1	0	1	1	0	1	1	1	1	1
	111	1	1	1	1	1	1	1	1	1	0	1	1	1	0	1	1	0	1	1	1	1	1
	114	1	1	1	1	1	1	1	1	1	0	1	1	1	0	1	1	0	1	1	1	1	1
	116	1	1	1	1	1	1	1	1	1	0	1	1	1	0	1	1	0	1	1	1	1	1
	118	1	1	1	1	1	1	1	1	1	1	1	1	1	0	1	1	0	1	1	1	1	1
	121	1	1	1	1	1	1	1	1	1	1	1	1	1	0	1	1	0	1	1	1	1	1
	123	1	1	1	1	1	1	1	1	1	1	1	1	1	0	1	1	0	1	1	1	1	1
	125	1	1	1	1	1	1	1	1	1	1	1	1	1	0	1	1	0	1	1	1	1	1
	128	1	1	1	1	1	1	1	1	1	1	1	1	1	0	1	1	0	1	1	1	1	1
	130	1	1	1	1	1	1	1	1	1	1	1	1	1	0	1	1	0	1	1	1	1	1
	132	1	1	1	1	1	1	1	1	1	1	1	1	1	0	1	1	0	1	1	1	1	1
	135	1	1	1	1	1	1	1	2	1	1	1	1	1	0	1	1	0	1	1	1	1	1
	137	1	1	2	1	1	1	1	2	1	1	1	1	1	0	1	1	0	1	1	2	1	1
	139	1	1	2	1	1	1	1	2	1	1	1	1	1	1	1	1	0	1	1	1	1	1
	142	1	1	2	1	1	1	1	2	1	1	1	1	1	1	1	1	1	1	1	1	1	1
	144	2	1	2	1	1	1	1	2	1	1	1	1	1	1	1	1	1	1	1	2	1	1
	146	2	1	2	1	1	1	1	2	1	1	1	1	1	1	1	1	1	2	1	2	1	1
	149	2	1	3	1	1	1	1	2	1	1	1	1	1	1	1	1	1	2	1	2	1	1
	151	2	1	3	1	1	1	2	3	1	1	1	1	1	1	1	1	1	2	1	2	1	1
	153	3	1	3	1	1	1	2	3	1	2	1	1	1	1	1	1	1	2	1	2	1	1
	156	4	1	3	1	2	1	2	3	1	2	1	1	1	1	1	1	1	3	1	3	1	1
	158	4	1	3	1	2	1	2	4	1	2	1	1	1	1	1	1	1	3	1	3	1	2
	160	4	1	3	1	3	2	3	4	2	2	1	1	1	1	1	1	1	3	2	3	1	2
	163	4	1	3	1	3	2	3	4	2	2	1	1	1	2	1	1	1	3	2	3	1	2
	165	4	2	3	1	3	2	3	4	2	2	1	2	1	2	1	2	1	3	2	3	2	2
	167	4	2	3	1	3	3	3	4	3	3	1	3	1	2	2	2	1	3	2	3	2	2
	170	4	2	4	1	3	4	3	4	4	3	1	3	1	2	2	3	1	3	2	3	2	2
	172	4	2	4	1	3	4	3	4	4	3	1	3	1	2	2	3	1	3	2	3	2	3
	174	4	2	4	1	3	4	3	4	4	3	2	3	1	2	3	3	1	3	2	3	2	3
	177	4	2	4	1	3	4	3	4	4	3	2	3	1	2	3	3	1	3	2	3	2	3
	179	4	2	4	2	3	4	3	4	4	3	3	3	1	2	3	3	1	3	2	3	2	3
	181	4	2	4	2	3	4	3	4	4	3	3	3	1	2	3	3	1	3	2	3	2	3
	184	4	2	4	2	3	4	3	4	4	3	3	3	1	2	3	3	1	3	2	3	2	3
	186	4	2	4	2	3	4	3	4	4	3	3	3	1	2	3	3	1	3	2	3	2	3
	188	4	2	4	2	3	4	3	4	4	3	3	3	1	2	3	3	1	3	2	3	2	3
	191	4	2	4	2	3	4	3	4	4	3	3	3	1	2	3	3	1	3	2	3	2	3
	193	4	2	4	2	3	4	3	4	4	3	3	3	1	2	3	3	1	3	2	3	2	3
	195	4	2	4	2	3	4	3	4	4	3	3	3	1	2	3	3	1	3	2	3	2	3
Figure 5I	SOD1G93A/WT	SOD1G93A/mUbL
inset	102	100
	109	79
	88	139
	102	67
	90	93
	60	142
	62	65
	79	65
	62	86
	118	65
	72	76
Figure 5J	Age (d)	SOD1G93A/WT										SOD1G93A/mUbL
	51	0	0	0	0	0	0	0	0	0	0	0	0	0	0	0	0	0	0	0	0	0	0
	53	0	0	0	0	0	0	0	0	0	0	0	0	0	0	0	0	0	0	0	0	0	0
	55	0	0	0	0	0	0	0	0	0	0	0	0	0	0	0	0	0	0	0	0	0	0
	58	0	0	0	0	0	0	1	0	1	0	0	0	0	0	0	0	0	0	0	0	0	0
	60	0	0	0	0	0	0	1	0	1	0	0	0	0	0	0	0	0	0	0	0	0	0
	62	0	0	0	0	0	0	1	0	1	0	0	0	0	0	0	0	0	0	0	0	0	0
	65	0	0	0	0	0	0	1	0	1	0	0	0	0	0	0	0	0	0	0	0	1	0
	67	0	0	0	0	0	0	1	0	1	1	0	0	0	0	0	0	0	0	1	0	1	0
	69	0	0	0	0	0	1	1	0	1	1	0	0	0	0	0	0	0	0	1	0	1	0
	72	0	0	0	0	0	1	1	0	1	1	0	0	0	0	0	0	0	0	1	0	1	0
	74	0	0	1	0	0	1	1	0	1	1	0	0	0	0	0	0	0	0	1	0	1	0
	76	0	0	1	0	0	1	1	0	1	1	0	0	0	0	0	0	0	0	1	0	1	0
	79	0	0	1	0	0	1	1	0	1	1	0	0	0	0	0	0	0	0	1	0	1	0
	81	0	0	1	0	0	1	1	0	1	1	0	0	0	0	0	0	0	0	1	0	1	0
	83	0	0	1	0	0	1	1	0	1	1	0	0	0	0	0	0	0	0	1	0	1	0
	86	0	0	1	0	0	1	1	0	1	1	1	0	0	0	0	0	0	0	1	0	1	0
	88	0	0	1	0	0	1	1	0	1	1	1	0	0	0	0	0	0	0	1	0	1	0
	90	0	0	1	0	0	1	1	0	1	1	1	0	0	0	0	0	0	0	1	0	1	0
	93	0	0	1	0	1	1	1	0	1	1	1	0	0	0	0	0	0	0	1	0	1	0
	95	0	0	1	0	1	1	1	0	1	1	1	0	0	0	0	0	0	0	1	0	1	0
	97	0	0	1	0	1	1	1	0	1	1	1	0	0	0	0	0	0	0	1	0	1	0
	100	0	0	1	0	1	1	1	0	1	1	1	0	0	0	0	0	0	0	1	0	1	0
	102	0	0	1	0	1	1	1	0	1	1	1	0	0	0	0	0	0	0	1	0	1	0
	104	0	0	1	0	1	1	1	0	1	1	1	0	0	0	0	0	0	0	1	0	1	0
	107	0	0	1	0	1	1	1	0	1	1	1	0	0	0	0	0	0	0	1	0	1	0
	109	0	0	1	0	1	1	1	0	1	1	1	0	0	0	0	0	0	0	1	0	1	0
	111	0	0	1	0	1	1	1	0	1	1	1	0	0	0	0	0	0	0	1	0	1	0
	114	0	0	1	0	1	1	1	0	1	1	1	0	0	0	0	0	0	0	1	0	1	0
	116	0	0	1	0	1	1	1	0	1	1	1	0	0	0	0	0	0	0	1	0	1	0
	118	0	0	1	0	1	1	1	1	1	1	1	0	1	0	0	0	0	0	1	0	1	0
	121	0	0	1	0	1	1	1	1	1	1	1	0	1	0	0	0	0	0	1	0	1	0
	123	0	0	1	0	1	1	1	1	1	1	1	0	1	0	0	0	0	0	1	0	1	0
	125	0	0	1	0	1	1	1	1	1	1	1	0	1	0	0	0	0	0	1	0	1	0
	128	0	0	1	0	1	1	1	1	1	1	1	0	1	0	0	0	0	0	1	1	1	1
	130	0	0	1	0	1	1	1	1	1	1	1	0	1	0	0	0	0	0	1	1	1	1
	132	0	0	1	0	1	1	1	1	1	1	1	0	1	0	0	0	1	0	1	1	1	0
	135	0	0	1	0	1	1	1	1	1	1	1	0	1	0	0	0	1	0	1	1	1	1
	137	0	0	1	1	1	1	1	2	1	1	1	0	1	0	0	0	1	0	1	1	1	1
	139	1	1	1	1	1	1	1	1	1	1	1	0	1	0	0	0	1	0	1	1	1	1
	142	1	1	1	1	1	1	1	2	1	1	1	0	1	0	0	0	1	1	1	1	1	1
	144	1	1	1	1	1	1	1	2	1	1	1	0	1	0	0	0	1	1	1	2	2	1
	146	1	1	1	1	1	1	2	2	1	1	1	0	1	0	0	0	1	1	1	2	1	2
	149	1	1	1	1	1	1	2	3	1	1	1	0	1	0	0	1	1	1	1	2	2	2
	151	1	1	1	1	1	1	4	3	1	2	1	0	1	0	1	1	1	1	1	2	2	2
	153	1	1	1	1	2	1	4	4	1	2	1	0	1	0	1	1	1	1	1	2	2	2
	156	1	1	1	1	2	1	4	4	1	2	1	0	2	1	1	1	2	1	1	3	2	2
	158	1	1	1	1	3	1	4	4	1	2	1	0	3	1	1	1	2	1	2	3	3	3
	160	2	1	1	1	3	1	4	4	2	2	1	1	3	1	2	1	2	1	2	3	3	3
	163	1	1	1	1	4	1	4	4	2	2	1	1	3	1	2	1	4	1	2	3	3	3
	165	2	1	1	1	4	2	4	4	2	2	1	1	3	1	2	2	4	1	3	3	3	3
	167	2	1	1	1	4	2	4	4	3	2	1	1	3	1	3	2	4	1	3	3	3	3
	170	2	1	1	1	4	2	4	4	3	2	1	1	3	1	4	2	4	1	3	3	3	3
	172	2	2	2	2	4	2	4	4	4	2	1	1	3	1	4	2	4	1	3	3	3	3
	174	3	2	2	2	4	2	4	4	4	2	1	1	3	1	4	2	4	2	3	3	3	3
	177	4	2	2	2	4	2	4	4	4	2	1	1	3	1	4	2	4	2	3	3	3	3
	179	4	2	2	2	4	2	4	4	4	2	1	1	3	1	4	2	4	2	3	3	3	3
	181	4	3	2	2	4	2	4	4	4	2	2	1	3	1	4	2	4	3	3	3	3	3
	184	4	3	2	2	4	2	4	4	4	2	2	1	3	2	4	2	4	3	3	3	3	3
	186	4	3	2	2	4	2	4	4	4	2	2	1	3	2	4	2	4	3	3	3	3	3
	188	4	3	2	2	4	2	4	4	4	2	2	1	3	2	4	2	4	3	3	3	3	3
	191	4	3	2	2	4	2	4	4	4	2	2	1	3	2	4	2	4	3	3	3	3	3
	193	4	3	2	2	4	2	4	4	4	2	2	1	3	2	4	2	4	3	3	3	3	3
	195	4	3	2	2	4	2	4	4	4	2	2	1	3	2	4	2	4	3	3	3	3	3
Figure 5J	SOD1G93A/WT	SOD1G93A/mUbL
inset	139	86
	139	160
	74	118
	137	156
	93	151
	69	149
	58	132
	118	142
	58	81
	67	128
		65
		128
Figure 5K		SOD1G93A/WT	SOD1G93A/mUbL
	150	1
	156	1
	157	1
	162	1
	169	1
	169	1
	169	1
	170	1
	180	1
	182	1
	186	1
	156		1
	159		1
	163		1
	168		1
	168		1
	173		1
	173		1
	174		1
	176		1
	180		1
	190		1
Figure 5L		SOD1G93A/WT	SOD1G93A/mUbL
	152	1
	153	1
	159	1
	161	1
	167	1
	174	1
	175	1
	175	1
	183	1
	184	1
	159		1
	159		1
	160		1
	162		1
	163		1
	169		1
	169		1
	169		1
	181		1
	182		1
	186		1
	188		1

## Sheet: Figure 6
Figure 6A	Brain soluble		Brain insoluble		SC soluble		SC insoluble
	SOD1G93A/WT	SOD1G93A/mUbL	SOD1G93A/WT	SOD1G93A/mUbL	SOD1G93A/WT	SOD1G93A/mUbL	SOD1G93A/WT	SOD1G93A/mUbL
	0.090525	0.096583	0.407492	0.134783	0.31761	0.095104	0.202462	0.092209
	0.070619	0.102672	0.363101	0.094193	0.198203	0.147252	0.149017	0.117771
	0.151092	0.110062	0.218392	0.146833	0.317759	0.204368	0.146142	0.111977
	0.046217	0.069414	0.273201	0.082203	0.137597	0.148523	0.070285	0.109938
	0.07712	0.102058	0.09265	0.11212	0.157007	0.101083	0.084866	0.059627
	0.10118	0.105729	0.138872	0.189131	0.113961	0.245549	0.079603	0.05427
Figure 6B	Brain soluble		Brain insoluble		SC soluble		SC insoluble
	SOD1G93A/WT	SOD1G93A/mUbL	SOD1G93A/WT	SOD1G93A/mUbL	SOD1G93A/WT	SOD1G93A/mUbL	SOD1G93A/WT	SOD1G93A/mUbL
	2.06	1.85	1.34024	0.676196	1.92	1.9	0.64	0.473573
	2.01	1.34	1.21453	0.731365	1.76	1.52	0.70596	0.744173
	1.93	1.23	1.28988	0.453673	1.88	1.22	0.401982	0.923284
	1.27	1.44	0.699447	0.3882	1.29	1.46	0.954079	1.06585
	1.81	2.26	0.669485	0.541105	1.64	1.73	1.17682	1.16388
	2.18	2.3	0.701628	0.750592	1.21	1.55	1.02516	1.22017
Figure 6C	Early-symptomatic		End-stage
	SOD1G93A/WT	SOD1G93A/mUbL	SOD1G93A/WT	SOD1G93A/mUbL
	10.3	22.7	2	10.75
	15	13.7	6.125	5.5
	12	15	5	5.75
	14	15.3	6.75	6
	14.3	17	7	3
	12.7	18.7	4	5.25
			7	11.25
			8.75	15.25
			7.75	10.5
			7.5	14.75
			4	5.5
			1.5	7.5
Figure 6D		Denervation						Partial innervation						Full innervation
	SOD1	65.7296	57.179	74.632	76.8167	79.334	92.1646	27.3475	31.1209	22.0162	20.2871	16.7949	6.76009	6.92292	11.7002	3.35176	2.89624	3.87113	1.07527
	SOD1/mUbL	50.8257	59.6152	47.5174	53.889	68.4006	75.8978	37.2106	30.2676	37.8069	34.2423	25.9897	17.9068	11.9638	10.1173	14.6757	11.8687	5.6097	6.19546

## Sheet: Supplementary Figure 1
Supp. Figure 1A
						Note: BioPROTAC X was initially assessed in the panel but was excluded from all subsequent analysis and not reported on.
Supp. Figure 1B	Control	BP 1	BP 2	BP 3	BP 4	BP 5	BP 6	BP 7
	99.8538	58.2388	54.746	86.0969	32.1648	22.2478	73.2793	80.0652
	34.926	50.8582	62.5888	86.4103	46.5172	24.577	62.4719	44.0511
	56.783	64.387	86.473	41.543	31.057	39.563	47.234	64.123
Supp. Figure 1C	Control	BP 1	BP 2	BP 3	BP 4	BP 5	BP 6	BP 7
	7.88871	6.26415	6.79011	5.80066	4.65522	1.95495	1.76326	4.21027
	4.15227	8.4346	4.00167	8.26907	4.85845	1.24107	6.92409	10.9537
	0.831521		0.492933	0.270312	0.207141	0.217089	1.91243	0.716753
	6.75081	4.94155	11.3174	6.96671	6.19382	1.38997	7.11929	6.91462
Supp. Figure 1D
Supp. Figure 1E	Control	BP 1	BP 2	BP 3	BP 4	BP 5	BP 6	BP 7	Untransfected
	1.89186	11.0946	14.366	8.96345	15.8839	14.4441	11.7719	16.3315	16.6882
	14.6992	16.9554	19.332	19.1253	21.465	15.2204	4.98296	2.28431	8.81075
	10.472	12.835	16.398	15.876	17.345	16.234	5.998	4.765	5.682

## Sheet: Supplementary Figure 2
Supp. Figure 2A	BP 1	BP 2	BP 3	BP 4	BP 5	BP 6	BP 7
	13.7692	21.3333	21.1795	17.5897	14.1026	18.6154	16.0256
	18.7179	19.9744	16.4359	21.3333	13.4103	12.7949	10.7949
	16.4872	25.5128	22.6923	16.4615	8.48718	3.69231	12.3333
Supp. Figure 2B	Control BP	BP 1	BP 2	BP 3	BP 4	BP 5	BP 6	BP 7
	35.4586	17.2655	17.6338	11.8109	30.565	21.7283	17.4359	20.0667
	65.8456	19.6732	16.5701	14.651	27.5169	23.9664	16.4384	20.5894
	47.8907	17.8423	13.8302	18.0943	26.8569	16.7489	21.2457	20.9112
Supp. Figure 2C	BP 1	BP 2	BP 3	BP 4	BP 5	BP 6	BP 7
	11.1	10.41	10.12	9.04	7.22	6.36	7.19
	8.467	11.592	9.3217	5.82	7.104	5.104	7.192
	5.482	8.392	6.105	5.293	3.501	2.295	3.294
Supp. Figure 2D	Control BP	BP 1	BP 2	BP 3	BP 4	BP 5	BP 6	BP 7
	26.2399	15.2699	11.7927	16.9925	52.8799	30.8368	14.2404	28.4827
	48.4676	17.7334	14.4966	14.3216	37.2479	14.2336	18.2228	39.288
	37.598	13.6369	10.9147	10.9541	17.238	37.9905	24.8913	29.8437
Supp. Figure 2E	BP 1	BP 2	BP 3	BP 4	BP 5	BP 6
	9.23809	6.21429	-0.92857	2.30952	3.73809	6.14286
	0.547619	4.30952	-1.85714	2.90476	0.333333	6.14286
	3.97619	3.52381	-2.59524	2.66667	1.78571	4.61905
Supp. Figure 2F	Control BP	BP 1	BP 2	BP 3	BP 4	BP 5	BP 6
	30.2185	12.1979	12.0415	24.3902	21.981	17.8472	22.8016
	29.1729	14.9533	17.0696	20.3357	21.544	22.8947	33.3056
	23.566	23.3282	14.4573	24.4636	19.4655	23.3603	21.4973
Supp. Figure 2G	BP1	BP2	BP 3	BP 4	BP 5	BP 6
	5.07143	3.64286	2.97619	3.61905	1.83333	3.90476
	2.05128	7.92308	8.5641	4.20513	2.17949	3.48718
	2.56136	6.78297	4.77015	4.91209	3.50641	5.19597
Supp. Figure 2H	Control BP	BP 1	BP 2	BP 3	BP 4	BP 5	BP 6
	24.9821	9.1954	15.4595	12.4517	10.015	18.8243	14
	30.572	12.642	11.2461	18.0155	14.5879	26.2997	17.0409
	13.7644	10.7992	8.46737	11.4388	10.4022	25.1701	20.0159

## Sheet: Supplementary Figure 3
Supp. Figure 3A		BP expression	GFP expression
	Control	2.31007	2.19635
	RNF4	2.14786	1.99031
	BTrCP	1.81873	2.06489
	UBOX5	1.78738	2.06489
	Parkin	2.3574	1.88339
	UBR5	1.75872	1.91506
	NEDD4L	1.74686	1.91506
	UBE4A	2.38402	1.79913
	CHIP	2.37882	1.8568
Supp. Figure 3B	Control	RNF4	BTrCP	UBOX5	Parkin	UBR5	NEDD4L	UBE4A	CHIP
	1.07375	0.744815	0.836543	1.01804	0.945838	1.12196	0.879028	0.922664	0.903098
	0.823778	0.979276	0.803358	0.809277	0.914526	0.901995	0.966431	1.00912	0.948708
	0.856431	0.840032	0.794774	0.866695	1.05156	0.817568	1.54998	1.00338	0.794166
	0.989887	0.768894	1.00484	1.18897	0.798776	0.952235	0.911819	0.955081	1.05608
	0.890617	0.855771	1.08183	1.21374	0.856315	1.34518	1.3824	0.904831	1.01817
	0.782797	0.764226	1.118	1.23063	0.856152	1.18163	1.16366	0.852138	0.698746
	0.932572	1.03831	1.04205	1.2519	1.0607	0.85404	0.982203	0.795904	0.702523
	0.906298	0.700811	0.871537	0.94264	0.807688	0.957978	0.892952	0.798754	0.95461
	1.08727	0.866905	1.21773	0.925953	0.917863	0.806551	1.2409	0.974465	0.790821
	1.01524	0.858518	1.10998	1.01267	0.860418	1.30699	0.953889	0.825744	0.878119
	0.914348	0.690084	1.35685	0.894454	0.930432	0.860181	1.31371	0.872389	0.746313
	0.887646	0.799169	1.06007	0.809989	0.812196	0.818454	0.995579	0.835761	0.754195
	1.07224	1.01582	1.18159	0.78634	0.955443	1.05802	1.04985	0.90243	0.867438
	1.07196	0.795661	1.02421	1.19917	0.910026	1.4287	0.853223	0.911358	0.805749
	1.03161	0.795563	1.03042	1.33565	0.776396	0.872734	0.877216	0.956608	1.16382
	0.98829	0.806327	0.775789	0.818983	0.898466	1.11541	1.0388	1.19721	0.893508
	0.97583	0.766353	1.19149	1.25205	0.871479	1.13969	1.05891	0.786734	0.882361
	1.0015	0.90906	1.15565	0.933176	0.950274	1.49175	1.04466	0.876798	0.866271
	1.01837	0.817537	0.812894	0.782171	0.889966	1.38582	0.876423	0.802081	0.851133
	0.736328	1.11818	0.947015	0.836406	0.969779	0.929754	1.38134	0.97887	0.904571
	0.911549	0.927437	0.815872	0.849416	0.846007	1.12758	0.930552	0.914219	0.885437
	0.886445	0.856126	0.996763	0.953607	0.875451	0.853631	1.11604	0.903274	0.684676
	1.05802	0.770751	1.31167	1.15049	0.942618	0.854688	1.06859	0.893436	0.819023
	0.788149	0.774407	1.24954	0.958819	0.938645	1.38614	1.09648	0.808285	0.875594
	0.875155	1.03197	0.995919	0.812707	0.865031	1.17504	0.904168	0.969864	0.850841
	1.00892	0.655296	1.24544	1.12887	0.817562	1.24348	0.978444	0.890594	0.907721
	0.799049	0.786237	1.07111	0.87479	0.896201	0.898584	0.867245	0.996042	0.97418
	1.08579	0.971952	1.15605	1.38703	0.941266	0.883798	1.40767	1.01745	0.828642
	0.936457	0.806221	1.18845	0.925328	0.806788	1.28237	1.3966	0.906406	0.880267
	0.676699	0.88083	1.15875	0.847495	0.906079	0.980692	1.29928	0.801222	0.758882
	0.795759	0.732911	1.11927	0.889564	0.749107	1.41902	1.22612	0.825883	0.836317
	0.777942	0.895135	0.811452	0.931405	0.98437	1.2831	0.972479	0.793508	0.817636
	0.855826	0.908838	1.04513	1.0605	0.839466	0.863695	1.24119	0.764618	0.782732
	1.12178	0.820478	1.0778	1.065	0.890022	0.86074	1.04891	0.840885	0.812482
	0.840408	0.939897	1.10359	0.84713	0.92959	1.13381	0.89316	0.780888	0.82815
	0.954477	0.846206	0.882931	0.884135	0.897914	0.878308	0.869761	0.830288	0.754119
	0.800084	0.783892	1.02331	0.865252	0.95409	0.843122	0.987906	0.906124	0.872739
	0.95501	0.757486	0.959643	1.18255	0.730562	1.07758	1.22544	0.916025	0.718866
	1.10995	0.792693	0.934335	0.843682	0.861179	1.05316	1.08124	0.793225	0.86534
	0.96909	1.19087	1.04433	0.826981	0.965767	1.19631	1.03127	0.880671	0.829964
	1.01333	0.820871	1.09865	1.0879	0.78798	1.16556	1.39737	0.78123	0.838742
	1.00298	0.867927	1.04379	1.00012	0.867552	1.0496	0.944308	0.788771	0.831034
	0.932996	0.854869	0.795913	0.826664	0.857923	1.10268	1.27173	0.768434	0.784296
	0.918459	0.901963	1.2198	0.838344	0.966758	0.892114	0.939188	0.921257	0.85291
	0.960558	0.782693	1.07191	0.824386	0.847002	0.880178	0.941487	0.951296	0.831478
	0.97664	0.863768	0.960264	0.88055	0.818819	0.86669	1.45177	0.854315	0.778723
	1.15197	0.852599	1.05053	0.960477	0.921742	0.853727	0.907294	0.913934	0.780246
	0.90771	0.86154	0.83885	0.912123	0.880199	0.846822	0.909622	1.05117	0.83618
	0.926165	1.33767	1.09083	0.832403	0.894298	0.890597	0.986914	0.86357	0.937737
	0.786507	0.774586	1.22343	1.08084	0.848284	0.850275	0.982626	0.939151	0.846984
	1.00961	0.921271	0.829488	0.83362	0.888276	1.00361	1.01833	1.00824	0.885013
	0.859047	0.86864	1.15544	0.853106	0.891413	0.86824	1.21345	0.990336	0.953985
	1.03539	0.888744	0.912495	1.16755	1.00714	1.29258	0.986772	0.800592	0.913142
	0.88828	0.849672	1.34341	0.793466	0.81816	1.28851	0.896134	0.890329	0.87072
	0.864422	0.666015	0.819275	1.29807	0.733858	0.952776	0.918983	0.752857	0.942863
	1.07022	0.955778	0.807133	1.15714	0.778478	0.865481	1.21013	0.877083	0.904715
	1.02891	0.901665	0.89376	0.849165	0.755293	1.03738	1.33265	0.790379	0.985234
	1.04702	0.954022	0.841699	0.839075	0.840933	0.895674	0.985313	0.752827	0.895314
	0.98933	0.730381	0.909265	0.834313	0.859515	0.923989	1.00972	0.760618	0.798376
	0.822278	0.733596	0.818746	0.823065	0.892386	1.06673	1.35991	0.827592	0.952034
	0.923707	0.861895	0.873274	0.899993	0.744789	1.42303	0.891666	0.733569	0.901088
	0.924244	1.03812	1.25256	1.44141	0.853182	0.908722	1.30451	0.806739	0.912659
	1.0297	0.806686	1.2876	0.882334	0.997216	0.913405	1.07618	0.895768	0.929231
	0.89932	0.721719	1.01547	0.837579	0.651166	1.27489	1.44534	0.86823	0.708736
	1.04066	0.898778	1.03374	0.88872	0.920082	0.880481	1.32898	0.898003	0.869114
	0.982302	0.699352	1.05105	0.832467	0.820007	0.861082	0.963066	0.856209	0.846369
	0.940268	0.896664	0.838157	0.898962	0.859748	0.871269	0.925697	0.701008	0.978713
	0.828304	0.872901	1.56278	0.921664	0.655635	0.882875	1.34201	0.992964	0.759283
	0.804044	0.758873	1.08084	1.00653	0.724145	0.893891	1.36515	1.01458	0.822721
	1.0411	0.726919	0.91037	0.955156	0.870248	1.08015	1.00843	0.719745	0.8954
	1.07885	0.750888	1.08823	0.837562	0.7601	1.09639	0.9413	0.847008	0.774723
	1.00356	0.906693	0.96134	0.801272	0.902505	0.876297	1.26551	0.870329	0.847505
	1.00341	0.990191	0.869078	0.911895	0.977368	0.994344	1.15271	0.876306	0.796704
	1.04933	0.712505	0.948061	0.812356	0.828261	0.83282	1.03161	0.875491	0.817601
	0.97439	0.752122	0.971154	1.0748	0.90307	1.01063	1.38742	0.973559	0.754092
	0.936426	0.80523	0.851274	0.84959	0.765903	0.998647	0.913497	0.907352	0.762637
	1.05664	0.946862	1.14749	0.946318	0.83288	1.12937	1.11141	0.812628	0.741456
	0.880458	0.830644	1.13685	0.922078	0.82558	0.915794	0.992733	0.93863	0.795902
	1.1383	0.957808	1.06268	0.836825	0.812464	0.88497	0.888857	0.96218	0.834326
	0.991096	0.91465	0.847886	1.0879	0.965647	0.972339	0.915265	0.794778	0.746149
	0.920941	0.715912	0.956955	0.821515	0.8509	0.839863	1.36705	0.817781	0.902251
	1.15706	0.812789	0.860494	0.825262	0.872608	0.850396	0.913156	0.74454	0.82518
	1.01701	0.828081	1.19735	0.820269	0.805963	0.840754	1.11535	0.870638	0.783448
	1.06571	0.821725	1.13627	0.992429	0.702796	0.910771	0.915874	0.824391	0.758069
	1.15102	0.902169	1.00427	1.07842	0.781291	0.97469	1.15366	0.899528	0.733699
	0.843123	0.855082	0.883076	0.979203	0.811392	0.972028	1.63573	0.918664	0.873768
	1.08184	0.996041	1.00411	1.09746	1.02471	0.873254	1.08624	0.818259	0.958297
	0.952133	0.855723	0.851999	0.914205	0.855268	0.869539	0.97499	0.897644	0.706679
	0.806516	0.885384	0.845455	0.889422	0.858635	1.12525	0.923013	0.832655	1.11253
	0.86797	0.993426	1.03113	0.971829	1.12261	0.895338	1.03667	0.849305	0.923093
	1.15788	0.795805	1.03089	1.00728	0.847233	0.892321	0.902436	0.701702	0.747631
	0.749425	0.74678	0.816958	0.965231	0.695998	1.51826	1.04957	0.955178	0.875059
	0.827136	0.98054	0.896734	0.850051	0.865124	0.899813	1.42008	0.836839	0.948952
	1.00918	0.794429	0.926744	1.46735	0.847865	0.914653	1.25179	0.926622	1.09421
	0.768878	0.923139	0.927431	0.831468	0.786317	1.08996	0.949413	0.88458	0.752465
	1.09344	0.828354	0.812451	0.90219	0.845368	0.876967	1.24218	0.796653	1.02538
	1.02394	0.873825	0.933588	0.896352	0.946913	0.924322	1.01097	0.829124	0.856753
	0.761308	0.709691	0.860598	0.929018	0.781923	0.906508	0.927252	0.878625	0.710124
	0.797773	0.774088	0.995083	0.904208	0.819586	1.04922	0.953408	0.711133	0.910596
	0.874404	0.824708	0.933358	0.829364	0.790612	1.01128	1.24359	0.842841	0.860996
	0.827085	0.71011	0.964397	0.846511	0.794786	1.11508	0.953673	0.888526	0.850917
	0.965339	0.753923	0.835725	0.883528	0.916697	1.00143	0.930896	0.889901	0.926954
	0.853127	0.851556	1.06736	0.849045	0.894791	0.941446	1.02224	0.837209	0.89312
	0.912395	0.940548	0.95566	1.32525	0.645735	0.848658	0.878574	0.899727	0.898395
	1.16771	0.909984	0.877748	1.17166	0.909031	0.955697	0.914588	0.913757	0.807889
	1.06565	0.922586	1.05417	0.82786	0.891557	1.00411	1.19804	0.879796	0.98218
	0.653672	0.953896	0.878534	0.910183	0.894594	1.33264	0.88202	0.885214	0.897627
	1.05203	0.788366	1.15739	0.829883	0.796549	0.882187	0.890467	0.826452	0.842743
	1.07999	0.786892	1.05727	0.880255	0.926369	1.15834	1.42142	0.862354	0.898875
	0.818635	0.770066	1.11109	0.849469	0.879049	0.872841	1.16098	0.862014	0.848447
	0.795964	0.853729	1.44321	0.892954	0.884427	1.12902	0.944845	0.858222	0.905975
	0.995439	0.805126	1.10507	1.08472	1.05096	0.922438	1.22765	0.906658	0.802936
	0.778549	0.900057	0.875537	0.898979	0.842212	0.908566	1.03146	0.952489	0.689276
	0.966337	0.859588	1.29425	1.0972	0.878035	0.903196	1.0879	0.962456	0.855899
	0.946741	0.895731	1.10805	0.843653	0.76101	0.950893	1.02548	0.87264	0.800976
	0.951429	0.788769	1.17516	1.09037	0.776796	0.876874	0.863226	0.876097	0.806481
	0.746496	0.898571	0.860186	1.09832	0.673424	0.936175	0.931116	0.898479	0.958993
	0.869853	0.86427	1.06182	0.981564	0.924794	0.912198	0.942252	0.668037	0.655746
	0.985187	0.852203	0.998685	0.865344	0.871678	1.00682	0.908915	0.85446	0.76381
	1.06088	0.791379	1.21118	0.881373	0.757422	0.904798	1.19734	0.793163	0.940888
	1.06879	0.743894	0.855019	0.881089	0.733568	1.3167	1.16927	0.96435	0.77522
	0.88998	0.695754	1.43439	0.959968	0.721245	1.13538	0.90308	0.858508	0.794468
	0.923939	1.03436	1.00227	0.8538	0.764621	1.30943	0.907157	0.87745	0.780647
	0.885982	0.809817	0.859977	0.833028	0.726947	0.911646	0.968538	0.670581	0.928575
	0.955302	0.723806	0.950007	0.969678	0.866928	1.68066	1.35047	0.82726	0.729949
	0.801599	0.722341	1.08543	0.809395	1.04839	0.980921	1.18902	0.848331	0.957018
	0.873198	0.818055	0.844102	0.993319	0.894166	0.904317	1.18761	0.723597	0.949027
	1.02631	1.1174	1.06965	0.881058	0.795447	0.978055	1.01839	0.882367	0.985043
	1.05481	0.816215	1.13479	0.886765	0.886471	1.42801	1.15302	0.917101	0.832444
	0.807166	0.890801	1.13242	1.01508	0.74083	1.08578	0.927983	1.10326	0.932184
	1.04416	0.631941	1.29647	1.02027	0.850841	1.11137	1.54906	0.905711	0.937313
	0.829252	0.812459	0.917729	0.85529	0.757164	0.899054	0.903106	0.873197	1.08274
	1.03731	0.968663	1.26201	0.867101	0.905581	1.1942	1.33772	0.871186	0.779538
	0.955259	0.804644	0.867204	1.10807	0.685703	1.0532	1.17537	0.98564	0.861623
	0.785334	0.831425	0.889837	0.806685	0.772338	1.25587	1.20959	0.847337	1.04349
	1.17733	0.833508	1.09299	0.826459	0.954425	1.06678	1.1032	0.801972	0.827027
	1.02093	0.826129	0.900628	1.29527	0.929285	1.05827	1.45322	0.831354	1.0126
	1.04822	0.889754	0.983846	0.997271	0.870526	1.15027	0.881551	1.04982	0.959856
	1.03843	0.827675	1.61774	0.901794	0.947578	1.1859	1.13607	0.817383	0.846927
	0.943639	0.726996	0.914521	0.903227	1.25124	1.04663	1.33216	0.86928	0.81189
	0.823041	0.89796	1.36536	1.06589	0.967871	1.31003	0.964617	0.916938	0.963176
	0.845228	0.717485	1.19121	0.993137	1.18282	0.986055	1.09215	0.84634	0.950552
	0.84746	0.879502	0.824175	0.868282	0.779685	0.947324	1.4282	0.789285	0.972719
	0.924093	0.964386	1.0681	0.918057	0.901687	1.02278	0.88204	0.805527	0.857345
	0.874438	0.970817	1.24579	0.865476	1.00921	1.4883	0.952504	0.907301	0.816262
	0.83816	0.727472	0.82719	0.811542	0.773579	0.958184	1.49384	0.965706	0.924074
	1.00652	0.977347	0.8345	0.873191	0.797484	0.960576	0.894882	0.79261	0.810207
	0.734015	0.88672	0.801231	1.17278	0.836281	1.07563	1.13041	1.11425	0.744518
	1.14949	0.812551	0.899649	0.817177	0.925603	0.906848	0.976577	0.888369	0.901531
	0.947134	0.936736	1.05947	0.851321	0.732855	1.10292	1.35415	1.19078	0.722082
	1.05613	0.900045	0.84393	0.933169	0.938982	1.16872	0.989769	0.922061	0.91967
	0.906794	0.815186	0.983132	1.06658	0.891004	1.20436	1.10671	0.863566	0.869525
	1.21358	0.784945	0.900401	0.832009	0.960302	1.28939	1.67397	0.812061	0.870088
	1.16188	0.692212	0.995876	0.959813	0.964503	1.42161	1.15475	0.929252	0.892359
	1.1362	0.889071	1.16952	0.939072	0.779621	0.919983	0.925205	0.860233	0.993865
	1.08428	0.861621	0.887426	1.04002	1.01186	1.16651	1.2531	0.945483	0.874098
	0.71533	0.848098	0.894103	0.819708	0.895277	0.8855	0.967538	0.843943	0.906362
	0.95551	0.830574	0.981769	1.05952	0.908299	1.06043	1.62033	0.79214	0.910814
	0.839377	0.655224	0.88024	0.893512	1.0154	1.03451	1.24011	0.945602	0.942249
	0.710847	1.09199	0.945076	1.50036	0.789303	1.32643	0.907758	0.912353	0.875988
	0.679458	0.727352	0.793479	1.1	0.868829	1.02973	1.05506	0.803421	0.800034
	1.11808	0.699425	0.905202	1.15186	0.758341	0.850173	1.536	0.89416	0.80725
	1.01506	0.924828	1.26382	0.933522	0.875858	1.26385	0.914764	0.985836	0.733569
	0.828863	1.06876	0.844895	0.940864	0.821482	1.37076	1.33539	0.976312	0.840976
	1.15809	0.95401	0.784968	1.0108	0.881723	0.880714	1.17373	0.824717	0.884689
	0.893949	0.766758	0.873059	0.74305	0.908911	1.13465	0.934746	0.898446	0.926744
	1.12251	0.767937	1.07363	0.818408	0.886995	0.920218	1.05304	0.9408	0.700692
	0.959812	0.884733	0.765201	1.04069	0.757336	1.13795	0.944778	0.849446	0.878232
	0.767454	0.902805	0.771548	1.08058	0.917785	1.12319	1.12478	0.879045	0.947819
	0.869955	1.01676	1.05281	0.861539	0.915814	0.906776	0.878618	0.847744	0.766352
	1.21917	0.848467	1.14238	0.785765	0.698093	0.875605	1.42577	0.870095	0.996313
	0.835123	0.747037	1.16943	0.833239	0.793245	1.05269	0.896374	0.86987	0.870121
	0.927305	0.929698	0.863839	1.34069	0.804945	1.12603	0.960367	0.91666	1.04153
	0.924447	0.893396	1.09539	0.830014	0.819127	0.984822	1.23621	0.94348	0.769177
	0.845197	0.713924	1.26412	0.901517	0.902313	0.909576	1.16718	0.984723	1.0894
	1.00619	0.941057	1.10883	1.2476	0.902107	0.845556	1.1854	0.751485	1.04543
	0.892758	0.811963	1.12062	0.841106	0.875834	0.915221	0.929833	0.943696	0.891346
	1.13386	0.85813	1.18145	0.868608	1.19299	0.893712	0.911203	0.770075	0.704802
	0.787393	0.862843	1.31042	1.05312	0.784422	1.01495	1.11347	0.955333	0.841438
	0.90455	0.867336	1.09208	1.17085	0.885105	0.938587	0.926431	0.732254	0.890088
	0.981262	0.870442	1.07102	0.874002	0.882061	1.15063	1.08067	0.842944	0.872721
	0.908332	0.729793	0.927272	1.10831	0.804469	1.22609	1.16832	0.932787	0.869532
	0.836598	0.990888	0.83723	1.50926	0.843485	0.983515	1.00643	0.861119	0.746253
	0.833184	0.850022	1.12617	1.08644	1.26033	0.924382	1.47212	0.889532	0.699194
	0.90617	0.85961	0.800323	0.87892	0.795992	1.42033	0.999944	0.841435	0.930994
	1.00891	0.99601	0.84421	0.918331	0.818075	1.18646	0.867427	0.87001	0.88892
	0.945367	0.835097	1.40824	1.12988	0.773568	0.975711	0.951918	0.822009	0.978366
	0.895338	0.821959	0.725408	1.43422	0.804088	0.937731	0.896977	0.960859	0.850965
	0.894419	0.711142	1.21523	0.895793	0.821677	1.07458	1.01594	0.830241	0.86296
	1.07545	0.776949	1.1701	1.01882	1.22151	0.972508	1.03895	0.831003	0.80187
	0.973638	0.662965	1.11619	0.869709	0.988338	0.909392	0.885489	0.888014	0.941789
	0.966284	0.835726	1.03746	1.08037	1.01451	0.874057	1.15169	0.83041	0.689587
	1.12292	0.881102	0.827497	0.914885	0.83023	1.12513	1.42464	0.917747	0.920594
	0.968024	0.844393	0.802844	0.872143	0.942174	1.19479	1.1294	0.816162	0.831436
	1.1527	0.800675	1.04081	0.795143	0.904411	0.917147	1.00686	0.812181	0.779454
	1.03232	0.756254	0.748727	0.858052	0.792864	0.886576	1.16447	0.879693	0.874333
	0.885262	0.820941	0.789733	0.888057	0.80761	0.829075	0.92884	0.811126	1.0128
	1.05017	0.907427	1.1418	0.935757	0.845433	0.867259	0.891096	0.883396	0.904901
	0.78863	0.796899	1.20633	0.876841	0.825792	0.875974	1.21515	0.883249	0.997505
	0.788	0.770708	1.0851	0.908876	0.947017	0.868995	1.11665	0.871354	0.730521
	1.08115	0.857277	0.824053	1.23705	0.939392	0.868943	1.20238	0.882719	0.823392
	1.04262	0.868191	0.830498	0.851159	0.815208	0.885158	1.21587	0.904414	0.938236
	1.06158	0.721315	0.997598	1.13752	1.02534	0.888165	0.979342	0.85336	0.842857
	1.06899	0.866021	1.07314	0.893616	0.837447	1.01471	0.924872	0.966097	0.81442
	0.852897	0.743376	0.996247	0.829127	0.88287	0.860634	1.23802	0.830078	1.00495
	0.938632	1.11232	0.821353	0.913403	0.99111	1.40083	1.32855	0.911742	0.904875
	0.99176	0.868148	0.819359	0.969184	0.825532	0.968592	0.87881	0.82654	0.831058
	0.789382	0.89858	0.810341	0.814765	0.992688	0.871423	1.32299	0.713412	0.826471
	1.05823	0.899997	0.919057	0.897464	0.814858	1.29556	1.01684	0.688337	0.865754
	0.818434	0.756225	0.878258	0.912605	0.853161	0.993104	0.987613	0.834564	0.965982
	1.09419	0.787814	1.2099	0.810937	0.77119	0.871119	1.09328	0.866072	0.696573
	0.852124	0.950238	0.899375	0.826038	0.932377	1.23956	1.3827	0.898489	0.81473
	0.877836	0.836067	1.253	0.876742	0.853936	1.45217	1.01725	0.883775	0.852851
	0.885825	0.79136	0.83877	0.888195	0.961505	0.954981	0.996674	0.939152	1.00854
	1.03365	0.85372	0.988334	0.899042	0.992741	1.16173	0.908086	0.970824	0.884415
	0.913494	0.720205	0.900156	0.83028	0.902539	0.942588	0.953535	0.868022	0.969312
	0.953294	0.762623	0.895381	0.815116	1.07844	1.39519	0.868852	0.802866	0.827971
	0.752856	0.702313	0.857778	1.21332	0.957159	0.842386	1.07262	0.788869	0.815899
	1.08903	0.921244	1.24699	0.88377	0.916251	1.34729	0.886206	0.814999	0.910706
	1.04805	0.750487	0.829847	0.934531	0.928191	0.91884	1.51059	0.801157	0.88375
	1.05544	0.787293	0.829076	1.20301	1.0132	0.885722	0.93051	1.11235	0.810488
	0.750777	0.841524	0.912544	0.87526	0.881781	0.88481	0.897643	0.867411	0.870612
	0.957391	0.892267	1.10184	0.983129	0.881859	1.368	0.992891	1.0059	0.946421
	1.06998	0.839608	0.797931	0.881035	0.855072	1.07708	1.10551	0.926359	0.80914
	0.881268	0.666462	1.03347	0.932643	0.826675	0.880491	0.907789	0.819586	1.09415
	1.16085	1.03443	1.09852	1.03483	1.03039	1.37939	0.897028	1.11453	0.830272
	0.962457	0.989051	0.877708	1.08648	1.05388	1.30915	1.16129	0.911298	0.894103
	0.955613	0.96001	0.795147	0.820677	0.917975	0.8467	1.15777	0.947114	0.901112
	1.08624	0.830696	0.884908	1.07631	1.0275	0.836942	0.933354	0.883549	0.78133
	0.950647	0.817679	0.873173	0.931929	0.89041	1.08881	1.02819	1.04403	0.896929
	0.778632	0.92304	1.08849	0.850978	0.930386	1.24751	0.9505	0.835128	0.907737
	0.819418	0.738757	1.10915	0.872611	1.09488	1.4963	0.866847	0.932316	0.859962
	0.950794	0.93758	1.10405	1.23889	0.929134	1.11526	1.17565	0.937724	0.932553
	0.901646	1.01379	0.853684	0.896797	0.923489	0.911049	1.05794	0.921505	0.886647
	1.06611	0.773031	0.811183	1.07882	0.892406	0.833028	1.075	0.867223	0.850195
	0.809119	0.866336	0.812504	0.860008	0.923571	1.08385	1.3641	0.837522	1.09007
	0.973416	0.919504	0.827362	0.953161	0.846776	0.935304	1.49798	0.917291	1.07686
	0.916796	0.923191	0.963509	0.866689	0.835607	0.951734	1.07203	0.859969	0.858834
	0.781024	0.804545	0.804375	0.858402	1.04362	1.32821	0.928363	0.838204	0.857455
	1.12532	0.876133	0.832662	1.03592	1.01366	1.23072	1.09698	0.923476	0.727294
	1.06625	0.782665	1.22418	0.87793	0.8104	1.24131	1.44551	0.90863	0.858693
	0.867054	0.783568	1.06941	1.04644	0.960413	0.847186	0.900919	0.992765	1.00477
	0.703984	0.779053	0.86534	0.87594	0.745256	1.2304	1.15942	0.863064	1.11332
	0.945711	0.848009	1.12686	1.08377	0.902445	1.0168	1.08637	0.874847	0.942595
	0.762698	0.804188	1.09945	0.877305	1.01483	0.94564	0.970446	0.924263	0.985589
	0.874938	0.897473	1.21978	1.12976	0.918005	0.885248	1.05528	0.78354	1.0025
	0.925041	0.709524	0.881376	0.840013	1.00002	1.27149	1.01112	0.845005	0.832176
	0.946285	0.687385	1.0695	0.920477	0.960825	1.30745	1.07943	0.891653	0.914402
	0.763166	0.733844	0.96374	0.903107	0.726527	0.936917	1.26593	0.816389	0.904359
	1.14956	0.732528	0.926443	0.87554	0.84413	1.14866	0.895018	0.902742	1.00155
	1.04291	0.804216	0.810495	0.983549	0.914961	1.09454	1.05961	0.856548	0.935855
	0.963053	0.820991	1.19668	0.960794	1.00122	0.927514	1.3762	0.946919	0.944259
	0.925572	0.930587	0.811669	1.08378	0.964465	0.874419	0.919271	0.829372	0.904763
	0.94287	0.820896	1.03744	0.869694	0.90777	0.918998	1.30526	0.928727	0.77702
	0.953376	0.777732	1.0329	1.01961	0.795684	0.879623	0.976206	0.828085	0.790459
	0.870598	0.837679	0.863709	0.958877	0.89868	0.93512	1.14405	0.712114	1.03266
	0.941087	0.862278	0.825748	0.951904	0.826777	1.34418	1.35211	0.739041	0.887611
	1.2032	0.783984	1.03514	0.911288	0.828054	1.17372	1.0634	0.865351	0.889738
	0.916198	0.955035	1.22782	0.911407	0.927267	1.1015	0.965019	0.722081	0.812467
	0.90648	0.791447	0.816053	1.03277	0.960988	0.927789	0.904054	0.751002	1.08737
	0.98789	1.00093	1.1429	1.00323	0.783554	0.949684	1.26814	0.778558	0.858981
	0.909257	0.866328	0.929246	1.16893	0.875943	1.06556	0.93043	1.00043	0.898884
	0.936024	0.881238	0.769388	1.29176	0.975584	1.1492	1.14002	0.784069	0.795387
	0.690885	0.880965	0.803185	0.918155	0.86221	1.14037	1.09226	0.933254	0.796725
	1.11798	0.798211	1.14627	0.861467	0.848635	1.0115	1.07782	0.72036	0.947939
	0.967017	0.774461	0.817056	1.12044	0.900277	0.948205	0.938355	0.876704	0.837832
	1.07553	0.84298	0.959199	0.995196	0.837786	1.11942	1.03084	0.886647	0.772543
	1.14427	0.842222	0.854722	0.98244	0.912549	1.26894	0.894661	0.83255	0.912497
	0.841962	0.794758	0.827578	0.892318	0.945021	1.43596	1.18102	0.932572	0.741499
	0.742055	0.839315	1.03914	1.11723	1.02732	1.202	1.211	0.861556	1.07302
	0.948815	0.868277	1.20082	0.929209	0.888777	0.928288	1.25551	0.860075	0.826792
	1.03429	0.995852	0.928025	1.0074	0.844569	1.25736	0.955597	0.972747	0.919347
	0.716902	0.698578	1.07799	1.21466	0.983338	1.01785	0.916609	0.856008	0.878132
	0.952495	0.956578	0.941821	0.846625	0.979447	0.885864	1.61169	0.920742	1.0637
	1.083	0.837618	0.91172	1.16001	0.850006	0.948149	1.10289	0.907831	0.927964
	1.26152	0.781218	1.28478	1.01154	0.713911	1.06406	1.1652	0.987215	0.923225
	0.979489	0.775676	1.0125	1.31466	0.835715	1.09603	1.00693	0.989392	0.810704
	1.11409	0.882493	0.955953	1.0815	0.986045	0.93872	0.948837	0.835902	0.867827
	0.85771	0.783032	1.1313	1.43338	0.98068	0.994657	0.908236	0.877373	0.990623
	0.918935	0.898563	0.869317	1.28965	0.840699	1.36155	1.11062	0.933782	0.948292
	0.8809	0.859388	1.42993	0.946099	0.871014	0.908982	1.17366	1.05906	0.779148
	0.967639	0.85431	0.822275	0.955841	0.855527	0.970978	1.10089	0.820361	0.7413
	0.967113	0.861012	0.811105	0.860316	0.683407	1.19604	1.03517	0.874584	0.777013
	1.06058	0.85623	0.798356	0.922504	0.872555	1.14722	1.02162	0.9638	0.896752
	1.01264	0.860531	1.00172	1.01086	0.940235	1.10652	1.25616	0.944014	0.940158
	0.982761	0.788156	1.16534	1.22471	1.01643	1.01131	1.11025	0.93631	0.934053
	0.952323	0.846553	0.78276	1.30543	0.926316	0.955834	1.07038	0.940125	0.964252
	0.978247	0.856676	0.787427	1.23161	1.02923	0.961581	1.05053	1.02186	0.860776
	0.942437	0.88642	0.991975	0.977099	0.952066	0.91923	1.16809	0.90404	0.969259
	0.774776	0.838639	0.92074	1.16056	1.08774	1.33067	1.0921	0.913378	0.853104
	0.9572	0.959601	0.991787	1.0424	0.898642	1.09337	1.21208	0.964684	0.818872
	0.930676	0.862311	1.00976	0.928031	0.921759	0.956968	1.10782	0.814709	0.64976
	1.01987	0.856707	1.2909	1.03208	0.974854	0.885663	1.2683	0.753207	0.832298
	0.866543	0.934565	1.24651	1.09608	0.691749	0.932139	0.970145	0.797971	0.957035
	0.894595	0.744653	1.0436	0.914091	0.843026	0.907984	1.20662	0.943645	1.01917
	0.956173	0.948278	1.2728	0.878855	0.955856	1.43815	0.96455	0.897324	0.931759
	1.0601	0.918251	0.968917	1.25746	0.967749	0.932598	1.59963	0.8976	0.957787
	1.01425	0.824566	1.15879	0.933665	1.13008	0.886369	1.02307	1.0097	0.861828
	0.786457	0.858277	1.18156	1.18413	0.939488	0.907888	1.01949	0.722204	0.886872
	1.07781	0.876085	1.18083	0.966864	0.944195	1.21267	1.04531	0.934428	0.864048
	1.07048	0.870568	0.745033	1.33709	0.964935	0.962703	1.08829	0.912441	0.88592
	0.823637	0.877808	1.46629	1.34313	0.933696	0.885826	0.968092	0.786596	0.895827
	0.764647	0.800585	1.10274	0.955446	0.932692	1.07714	0.949053	0.915299	0.901414
	0.984744	0.858954	1.11817	1.10166	0.909437	1.24378	1.34959	0.938625	0.820963
	0.912095	0.922008	1.14593	0.928336	0.927039	0.935692	1.09407	0.991334	0.914283
	1.13102	0.683156	1.45285	1.12589	0.781606	0.905617	1.06195	0.86737	1.03593
	0.819771	0.809915	1.10328	1.1013	0.922685	0.917146	0.913377	0.8486	0.92878
	0.79043	0.894151	1.06231	1.16963	0.879201	1.18046	0.955834	0.989031	0.984244
	0.966341	0.727587	1.04871	0.930815	0.833558	0.94139	1.08039	0.979169	0.881892
	0.920908	0.811216	1.24503	1.00134	0.865168	1.21554	0.940533	1.0158	0.873024
	0.809887	0.845502	1.00188	1.16741	0.864261	0.909812	1.04845	0.742264	0.884448
	1.01236	0.764252	1.03796	0.887709	1.05588	0.919382	1.14514	0.805115	0.8369
	0.753216	0.815903	1.26174	0.975855	0.94839	0.899579	1.00662	0.962623	1.01178
	0.837575	0.835266	0.790196	0.90225	0.904127	1.12795	1.22704	1.06899	0.821775
	0.803587	0.996168	1.0408	0.997847	0.87272	1.31386	0.926591	0.929247	0.885802
	1.2353	0.966351	1.00856	1.24453	0.786872	1.3075	1.36343	0.885821	0.996216
	0.958583	0.785339	0.848108	0.922497	0.891008	1.00924	1.09611	1.0153	0.968314
	1.17247	0.877139	1.24262	0.846059	0.896327	0.924713	1.05939	0.839452	0.828395
	0.895917	0.809748	0.745592	1.28551	0.932261	0.933224	1.10363	1.01826	0.844192
	0.892112	0.77549	0.956752	0.869997	0.929861	0.90275	0.949142	0.951502	0.945288
	0.984409	0.817108	0.722663	1.21817	0.933844	1.21916	1.16525	0.954067	0.855666
	1.04755	0.83317	1.12074	0.867358	0.906387	0.975301	1.1225	0.992224	1.04234
	1.17016	0.968114	1.19793	0.984895	0.889388	1.2133	0.959511	0.722087	0.878283
	0.75977	1.0071	1.04628	1.06723	0.895458	0.976846	1.03118	0.957356	0.94023
	0.971788	0.849277	0.815132	1.26465	0.890891	0.934349	0.928793	0.838058	0.82352
	0.994045	0.881582	1.04897	0.87789	0.97257	0.89493	1.01213	0.94269	1.05908
	0.913012	0.692444	0.982363	0.922044	0.791657	0.965258	0.904602	0.733568	0.922797
	0.778561	0.792352	1.02821	1.07919	0.93207	0.966599	1.42533	1.15526	0.782392
	1.04489	0.701587	1.02938	0.876329	0.936415	1.29132	1.29263	0.784841	0.908611
	1.11616	0.790861	0.900386	0.909566	0.819575	0.950423	0.954179	0.760378	0.841748
	0.827152	0.868194	0.828188	1.22742	1.06055	1.19777	0.985193	0.798344	0.981314
	0.956822	0.842586	1.2501	0.977417	0.983675	0.925762	0.994947	0.846219	0.873184
	0.779566	0.850379	0.86775	0.873123	0.996572	1.28979	0.941835	0.92045	0.789379
	0.859606	0.931798	0.957114	0.918234	0.853555	0.922895	0.949264	0.978944	0.895311
	1.03581	0.74793	0.81735	1.3398	0.808009	0.941593	1.2582	0.938327	0.944836
	0.861473	0.938991	1.08662	0.866833	0.915148	1.20196	1.39257	1.20741	0.831308
	0.848974	0.858677	0.776844	1.17441	0.724342	1.39824	0.996633	0.820489	0.801589
	0.761068	0.806319	1.11258	0.843903	0.813766	1.39088	0.950986	0.860336	0.670867
	1.03699	0.799968	1.49015	1.01613	0.775554	0.938848	0.948058	1.02912	0.777713
	0.831139	0.955183	1.30526	0.891566	0.987049	1.04341	1.01911	0.912938	0.869579
	0.945176	0.798019	0.778973	0.865339	1.05467	0.863819	0.923083	1.03171	0.836896
	1.00834	0.84156	1.03518	0.980657	0.730219	1.08777	1.51665	0.937289	0.805889
	1.08803	1.02312	1.07189	1.03063	0.958813	1.26061	0.966296	0.809911	0.804078
	0.898256	0.992924	1.28089	1.27135	0.688561	0.965421	0.921615	0.739553	0.673331
	1.0158	0.956593	1.23656	1.02225	0.937974	0.904314	1.18301	0.920154	0.690724
	0.951879	0.739238	1.01081	0.876579	0.860194	1.17733	1.01894	0.85733	0.888338
	1.09444	0.859117	1.02502	0.9332	0.875059	0.959461	1.12899	0.864632	0.869415
	0.980096	0.760057	1.21536	1.1209	1.01025	1.03527	0.955849	1.02985	0.928971
	1.14839	0.851642	1.22837	1.20935	0.988946	0.899703	1.00059	0.983959	0.848542
	0.843606	0.842797	0.974615	0.959441	0.875334	1.23142	1.06245	0.821669	0.770749
	0.955839	0.749378	1.21232	0.867137	0.927618	1.01787	1.30401	0.926824	0.923508
	1.12696	0.83803	0.857211	0.956595	0.878103	0.931208	1.46054	0.871215	0.839937
	1.09983	0.973515	0.918931	0.879058	0.850385	1.23671	1.36945	0.766712	0.984819
	1.05686	0.808057	1.04245	0.921986	0.755708	1.62907	1.06504	1.00214	0.758373
	1.15606	0.877452	1.16512	1.34542	0.921967	1.245	1.03721	0.9261	0.933526
	1.19922	0.866144	1.18867	1.00601	0.860662	1.01888	1.35506	0.797029	0.841075
	1.03048	0.893123	1.14589	1.37734	1.04322	0.926917	1.29924	0.78519	0.847852
	1.15011	0.749773	0.902992	1.26242	0.89204	0.969158	1.41489	1.09144	0.959871
	0.940683	0.785362	0.902885	0.851982	0.8851	1.21182	1.12196	0.918015	0.894228
	1.25682	1.2915	0.903335	1.13326	0.772419	0.897717	0.891683	0.929553	0.935529
	1.03379	0.808657	1.16215	1.40447	0.926354	1.05519	1.24397	0.790008	0.818534
	0.914941	0.750466	0.848099	0.966403	0.963722	1.72085	1.06224	0.764437	0.911668
	1.07641	0.866136	1.10909	0.861213	0.899031	0.966389	1.28598	0.980913	0.930985
	0.975032	0.816224	0.854385	1.06489	1.01799	0.913688	1.04652	1.22211	0.881467
	0.808793	1.02988	0.797272	0.954068	0.934775	1.11156	1.213	0.884171	0.85107
	1.13346	0.986569	0.840301	0.884169	0.881652	0.941068	1.30173	0.963444	1.03824
	1.15798	0.905416	0.854572	0.897878	0.838781	0.983751	1.36201	0.902052	0.880709
	1.04145	0.841065	1.06755	1.02993	0.893837	0.965292	1.06168	1.0874	0.992493
	0.841204	0.895062	0.934242	1.04402	0.734057	1.2028	0.952108	0.930287	0.901391
	1.08239	0.939814	0.801756	1.02102	0.863229	1.36824	0.935462	0.978119	0.776435
	1.07763	0.919672	0.876346	0.847755	0.921244	1.1566	1.20233	0.905918	0.836443
	0.945156	0.817949	0.828587	0.895796	0.862619	0.999577	0.962478	0.905176	0.945663
	0.998457	0.792864	1.10578	1.44515	0.940789	0.929909	0.964419	0.774248	0.714198
	0.925192	0.958143	0.840433	0.903533	0.909063	0.875802	1.07991	0.867716	0.998729
	0.885987	0.893471	1.14079	0.984824	0.962145	0.902686	1.09772	0.914099	0.830546
	0.940626	0.771104	0.788623	1.10881	0.94077	0.890366	1.12224	0.952844	0.771485
	1.25077	0.864367	0.998838	0.958797	0.974025	0.933686	1.1216	0.795012	0.832568
	1.11189	0.825127	1.06382	0.914964	0.916238	1.23588	1.2694	0.763121	1.04506
	0.888945	0.726156	0.88142	0.912915	0.895338	0.973857	1.00009	0.799744	0.922624
	0.930142	0.760007	0.948316	1.19325	0.917232	1.09075	0.984201	0.92447	0.810977
	0.920973	0.767599	1.17784	1.00062	0.794992	0.870288	1.05234	0.927269	0.879061
	0.837275	0.881201	1.40704	0.858381	0.755779	0.933722	1.30079	0.913513	1.04868
	0.907494	0.974924	0.885505	0.939472	0.933004	0.859697	0.988194	0.813408	1.00438
	1.15696	1.09318	0.807321	0.880685	0.927047	0.986833	0.92648	0.907105	1.02501
	0.868179	0.844793	1.13063	0.873302	0.886715	1.01806	0.977745	0.799467	0.932562
	1.12334	0.818766	0.980517	1.24738	0.761064	0.932695	1.01782	0.789589	0.893571
	0.995838	1.0308	1.05159	0.908836	0.889311	0.918336	1.12243	0.910067	0.896369
	0.92261	1.00183	0.845085	0.886856	1.13653	1.20594	1.05053	0.926085	0.836359
	0.940239	0.8004	1.11815	0.857688	0.830034	1.42209	1.05285	0.879846	0.962226
	1.18639	0.823473	1.25295	1.02538	0.895315	1.14855	1.1785	0.871916	0.825399
	1.01512	1.01998	0.821799	0.961607	0.922801	1.31473	1.24932	0.914802	0.799934
	0.874314	0.792913	0.913844	0.930282	0.796499	1.04168	0.929459	1.00328	0.793183
	1.30817	0.972648	1.12416	0.995097	0.834776	0.958746	1.09966	0.834415	1.00346
	0.922527	0.714897	1.11575	0.86034	0.845342	1.14006	0.963109	1.02974	1.00313
	1.02831	0.747424	0.963935	1.17092	0.967364	0.938592	1.02425	0.893949	0.951946
	1.01673	0.763793	1.14629	0.986153	0.94962	0.899768	1.0952	0.879095	1.05322
	0.946859	0.86195	0.868866	1.116	0.773382	0.989588	0.955077	0.748855	0.887287
	0.894816	0.726674	1.10529	0.815472	0.861062	0.882165	1.13417	0.850124	0.791017
	0.948751	0.793392	0.886834	0.868029	0.944119	0.974743	1.25039	0.876734	0.999393
	1.11257	0.900663	1.12973	0.996278	0.936759	1.03828	1.16859	0.844599	0.921246
	0.88587	0.703079	1.12647	1.0611	0.901892	0.866749	1.07858	0.943464	0.798007
	1.16288	0.937809	1.06149	0.895665	0.907034	0.897522	1.16011	0.865476	0.997314
	0.995953	0.740052	0.891407	1.12137	0.717615	1.3511	0.92908	0.801474	0.844347
	0.977342	0.937091	0.781509	0.826859	0.950812	1.17348	1.28968	0.853413	1.0062
	1.00649	0.701007	1.02606	1.13731	0.943545	0.948859	1.01241	0.886329	0.83436
	0.875411	0.873192	0.939841	0.890554	0.882276	0.957581	0.929224	0.873705	0.918804
	1.26518	0.850282	0.878227	0.86491	0.901648	1.0169	1.18017	0.896855	0.847888
	0.927492	1.03239	1.3276	0.827706	0.931227	1.17309	0.897549	0.865833	0.821325
	0.857608	0.672479	0.881214	0.963819	1.02328	1.33819	1.13749	0.878237	0.892419
	1.03194	0.808123	1.01438	0.860393	0.8645	1.3988	1.00364	0.957837	0.765707
	0.80574	0.844774	0.858035	1.16316	0.838249	1.29044	1.14619	0.834564	0.839464
	0.785731	0.750874	1.69958	1.50141	0.985615	0.950032	0.933221	0.971226	0.946456
	1.09452	0.870848	1.02889	1.12587	0.862234	0.919793	1.27896	1.0157	0.855678
	0.897989	0.820617	0.90886	1.34131	0.855419	0.950196	0.930869	0.927975	0.943874
	0.948961	0.874208	1.08591	0.965715	1.02836	1.00341	1.07501	0.891132	0.686009
	1.00605	0.731078	0.939721	1.11968	0.715695	1.26274	1.29902	0.911086	0.853337
	0.933296	0.921603	1.13166	1.03577	0.86954	1.38725	1.17933	0.776164	0.869506
	0.938551	0.763746	0.900778	0.809335	0.832809	1.10611	1.25937	0.945325	0.975574
	0.889077	0.861785	0.827433	0.868212	0.923382	1.0007	0.978555	0.905238	0.955374
	0.994764	0.745687	0.914885	0.958105	0.781121	1.0618	0.931271	0.777705	0.619557
	1.00092	0.904104	1.07015	0.905009	0.843884	1.30755	0.892627	0.898901	0.906596
	0.760806	0.925391	1.02114	1.00885	0.760391	1.32304	0.920437	1.03725	0.985393
	0.901771	0.874857	1.08482	1.34102	0.721043	1.4119	0.948971	0.979177	0.763125
	1.09503	0.730948	1.12373	1.31511	0.881286	1.11197	0.930413	0.899438	0.632123
	0.83987	0.824031	1.01444	1.15578	0.909565	1.24504	0.942367	1.00024	1.01104
	1.26034	0.926864	1.36645	1.40902	0.826246	1.30726	1.29685	1.05272	0.881953
	0.861714	0.926715	1.02276	0.873956	0.898763	1.31628	0.927529	0.984147	0.894466
	0.98966	0.698166	1.30211	0.810548	0.843895	1.05661	0.938241	0.856316	0.783522
	0.858508	0.969226	1.24019	1.30492	0.872752	1.31036	1.30742	0.749138	0.83824
	0.968845	0.772832	0.827341	1.3922	0.927508	1.23899	1.24761	0.746102	0.87864
	0.946219	0.786053	1.19521	1.09488	0.841539	1.05973	1.09489	0.93582	0.983403
	1.0374	0.892141	0.944733	0.86077	0.925444	1.05856	0.946695	1.22202	0.857263
	0.770787	1.08627	1.17337	0.880339	0.73117	1.10266	1.41128	1.00123	0.971977
	1.08343	0.858128	1.05505	1.16563	0.863696	1.21047	0.963194	0.971115	0.940964
	0.97146	0.837301	1.07385	1.0131	0.815145	1.34875	0.972127	0.885431	0.917631
	0.957929	0.991739	0.822815	0.814762	1.00768	1.08698	1.12365	0.925537	0.955891
	0.969238	0.722616	0.830243	0.981815	0.903308	1.06438	1.06383	0.899343	0.923271
	0.829804	0.954474	1.19199	1.23738	1.05958	1.19225	1.13519	0.930007	0.795812
	0.997348	0.865905	1.30947	0.78901	0.956153	1.26638	0.946348	0.908637	0.798909
	0.8634	0.904173	1.02415	1.09724	1.03154	1.20719	1.05736	0.9095	1.03373
	1.0311	0.893759	1.06925	0.839595	0.835926	1.18644	1.33146	0.923297	0.90538
	0.921075	0.972279	1.24941	1.43822	0.845372	0.96211	0.935809	0.830663	0.893033
	0.957478	0.882318	0.896024	0.831305	0.872765	1.20177	1.18609	0.903943	0.907657
	1.03017	0.993448	1.3036	1.02894	0.98684	1.16762	1.11962	0.84843	0.921716
	1.2426	0.841867	1.13359	0.93562	0.951029	1.0218	0.932712	0.836398	0.896615
	1.01015	0.728655	1.19901	0.934963	0.825454	1.24349	1.0209	0.917204	0.814471
	1.0106	0.779602	0.910836	1.31489	0.898555	1.04967	1.46952	1.60761	0.757989
	0.954332	0.953832	1.07896	0.949463	0.779741	1.06828	1.17996	0.976632	1.02988
	1.19749	0.781147	1.35008	0.796198	0.811175	1.24463	0.936542	0.731231	0.883383
	1.1708	0.938193	1.36915	1.11798	0.923363	1.23669	0.936663	0.870469	0.882078
	1.25847	0.831472	1.0365	0.806452	1.00284	0.879801	1.20613	0.874818	0.963564
	0.973479	1.0434	1.02896	0.990074	1.08481	1.29237	1.27377	0.894211	0.907038
	0.969892	0.721069	1.44547	0.968145	0.890189	0.87035	0.94691	0.863293	0.939228
	1.11499	0.866256	0.758778	1.04314	0.914379	0.924563	0.926176	0.806186	0.90171
	1.04082	0.791915	0.853398	1.26002	0.989069	1.20241	1.05602	1.04228	0.836472
	1.07356	0.736353	0.961916	0.937301	0.913835	1.21691	1.15775	0.856353	0.791997
	0.85281	0.858282	0.978287	1.23278	0.879616	1.2378	0.983158	0.74802	0.835528
	0.846468	0.835203	1.0235	1.00973	0.944286	1.15501	1.15723	0.960943	0.973677
	1.01783	1.1112	0.898129	0.895527	0.897633	1.03218	1.266	0.970201	0.883599
	0.825461	0.86627	1.12827	1.13705	0.81163	0.973437	0.962143	0.910002	0.825218
	0.858879	0.868475	1.19419	0.965838	0.864933	1.18629	0.886195	0.862033	0.809194
	0.811541	0.88366	0.916909	0.987155	0.992372	0.994923	0.981301	0.885665	0.820078
	1.04561	0.958906	0.966864	0.851927	0.992371	1.12647	1.08819	0.795728	0.91264
	0.958329	0.813436	1.06334	0.876496	0.908822	0.937603	1.17738	0.964647	0.767086
	1.00548	0.748179	0.945336	0.999093	0.89538	1.19102	0.947136	0.891809	0.931713
	1.09764	0.849243	0.887735	1.02276	0.93013	0.970176	1.21572	0.920785	1.02771
	0.897594	0.931983	0.845462	1.10693	0.941401	0.900813	1.47426	1.07444	0.864554
	0.972675	0.917237	1.13188	0.958425	0.817807	1.01085	0.909956	0.844162	0.972957
	0.670639	0.836417	1.14455	0.985536	0.790265	1.17002	0.927007	0.919959	0.973431
	0.936446	0.970232	1.07735	0.863387	0.838919	1.00839	0.982835	0.976774	1.02474
	0.797391	0.870354	1.16589	0.855865	0.956148	0.940418	0.890762	0.941261	0.906507
	0.734164	0.807786	0.970577	0.852007	1.01083	1.34542	1.00426	1.01546	0.872776
	1.1094	0.825924	0.97689	0.82432	0.761209	1.07837	1.06612	0.792217	0.904862
	0.991487	1.00419	0.896458	0.872109	0.846301	1.15457	0.912138	0.916101	0.84547
	0.891097	0.90894	1.14716	0.8385	0.886464	1.08223	1.16305	0.765294	0.862437
	1.00872	0.839923	1.18088	0.894999	0.76664	0.89534	0.981321	0.951018	0.751925
	1.09403	0.91447	0.930017	1.24952	0.775804	0.959242	0.978478	0.828514	0.868753
	1.10352	0.7789	1.0737	1.12904	0.884733	0.979743	1.06903	0.837909	0.821229
	0.891029	0.823925	0.870463	0.86525	1.20836	0.97207	0.896029	1.00056	0.886707
	1.08172	0.872595	0.858053	0.906559	1.05763	0.946041	1.38279	0.914877	0.851244
	0.959139	0.809101	1.08617	0.975574	0.847041	1.24836	1.39133	0.888372	0.803292
	0.784876	0.985748	0.909459	1.06114	0.802232	0.903588	1.17137	0.946382	0.839616
	1.02249	0.771159	1.43131	1.25179	0.963825	1.29592	1.05925	0.853018	0.793728
	1.13796	0.854958	0.861851	0.838147	0.990182	0.93516	1.16693	0.903307	0.884558
	0.95671	0.946437	0.868661	0.850606	0.764012	0.889208	1.39832	0.952567	0.885452
	1.18612	0.739655	0.967722	1.13474	0.838211	0.970568	1.01938	0.873212	0.828049
	0.805601	0.818711	0.894726	0.971117	0.853304	1.15849	1.59332	0.933103	0.910063
	0.970037	0.766482	1.16574	0.876328	0.921314	1.29229	0.920569	0.863978	0.733158
	0.981812	0.804469	1.24903	0.843862	0.865551	1.0567	1.13363	1.10173	0.754693
	0.918727	0.926269	1.13709	0.823265	0.747826	1.19098	1.03242	1.03813	0.875349
	1.04818	0.815063	1.0831	0.898136	0.763253	1.10406	1.00554	1.12122	0.858365
	0.818333	0.799643	1.24476	0.850062	0.907591	1.21826	0.980789	0.89251	0.7291
	0.810499	0.816381	1.43912	0.878407	0.876018	0.99595	0.897808	0.88199	0.85041
	0.971045	0.840797	1.07139	0.882418	0.757167	1.16641	0.992519	0.866095	0.734525
	0.944705	0.72051	0.885643	0.939175	0.905615	0.998236	0.905327	0.862473	0.965887
	1.06198	1.0588	0.934297	0.8474	0.851471	1.14348	1.0817	0.943199	0.852862
	1.0144	0.964868	1.07083	0.899201	0.843482	1.38811	0.934767	0.835549	0.783461
	0.857227	0.863009	0.908885	0.86302	0.793521	0.904239	0.912491	0.824699	0.865375
	1.19382	0.8038	0.882393	0.866864	0.874611	1.10988	1.07913	0.881237	0.92477
	0.919314	0.77232	1.08753	0.899302	1.05125	0.913196	0.917331	0.950987	1.00314
	1.01915	0.780902	0.954898	0.89597	0.804381	0.953699	0.987552	0.787711	0.864215
	0.80269	0.825751	1.03909	0.897964	0.914575	0.923247	0.984187	0.923151	0.926577
	0.786835	0.827757	1.04767	1.08124	0.86267	1.00544	1.25626	0.825892	0.891352
	1.01965	0.758388	1.06606	0.9635	0.846931	0.969359	1.20514	0.951815	1.03123
	0.976226	0.785479	0.972479	0.927713	0.734885	1.08869	1.35684	0.991079	0.987557
	0.775727	0.74959	1.4214	1.135	0.862775	0.945786	0.927241	0.883274	0.935909
	1.02495	0.785841	1.0443	0.872405	0.933697	1.08566	1.11927	0.93658	0.723462
	0.778942	0.758261	0.908951	0.951032	0.953947	1.34592	1.18313	0.892177	0.862101
	1.00803	0.80203	0.895092	0.926551	0.905871	1.28699	0.997958	0.886903	1.19557
	1.05773	0.72843	1.01631	0.998113	0.874428	1.24414	0.935798	0.847544	0.891354
	0.822361	0.730085	1.01062	0.997505	0.908076	0.922757	0.993384	1.12803	0.934527
	0.987473	0.891396	1.28964	1.19552	1.00173	1.6478	1.432	0.842287	0.853682
	1.01678	0.870037	0.98011	1.02963	1.10951	1.2927	1.04973	0.909231	0.862018
	0.825098	0.775187	0.990081	1.02397	0.889214	1.14168	1.28241	0.929988	0.929758
	0.813663	0.873115	1.20933	0.848618	0.885704	1.6258	1.10724	0.944609	0.991305
	0.848583	0.897096	1.03873	1.10153	0.883119	0.973467	1.38433	0.817984	1.01906
	0.859862	0.970093	1.03808	1.05872	0.774519	1.23537	0.940032	0.941926	0.930567
	0.888517	0.922202	1.10405	1.14514	0.854417	1.00692	1.41131	0.998685	1.01818
	0.986686	0.903136	1.11704	0.879127	0.983057	1.0236	0.937071	0.798928	0.880376
	0.873167	0.799	0.897717	1.01387	0.933762	0.93742	1.27956	0.947407	0.975368
	1.07241	0.856302	0.929611	1.13619	0.903188	0.946511	1.45982	0.817954	0.857401
	0.997527	1.03059	1.46541	0.929015	0.887053	1.27385	1.30973	0.999369	0.87731
	1.14289	0.818138	1.1138	0.959248	0.813949	1.13328	1.02363	0.835228	0.88075
	0.962969	0.821618	0.904135	1.17339	0.817256	0.88412	0.930037	0.794757	0.801411
	1.07339	0.849162	1.09074	0.908087	0.848001	1.04771	1.08494	0.948067	0.779845
	0.656898	0.805466	1.31315	0.89161	0.94589	0.939305	1.65789	0.863485	0.737924
	1.00687	0.882945	0.965472	1.07869	0.862571	0.969655	1.07502	0.967481	0.816079
	0.782155	1.15281	0.895035	0.843783	0.936572	0.920547	1.18916	0.896575	0.937442
	0.905905	0.925659	0.858062	0.891086	0.89832	1.0302	1.40325	0.953303	0.887637
	0.928849	0.781717	1.25854	1.10369	0.780706	1.09754	1.32014	0.963792	0.819536
	0.98841	0.883929	0.835337	0.912109	0.890064	1.01198	1.20029	1.05542	0.908075
	0.899948	0.810296	1.04543	0.977554	0.941397	1.39972	0.934283	0.935883	0.895524
	0.789121	0.892853	1.0345	1.19252	0.803007	1.13885	0.984642	0.802866	0.884744
	0.857855	0.760189	1.00274	0.988619	0.883729	1.03551	1.33796	0.800014	0.889127
	0.735003	0.807016	0.968542	1.18328	0.792875	1.12759	1.05164	0.845348	1.04017
	0.836061	0.900787	0.996109	1.05866	0.841662	1.19816	1.13623	0.840923	0.832433
	0.974785	0.88337	1.01486	0.942684	0.774539	0.917204	1.37965	0.903536	0.918822
	0.727678	0.725702	1.0603	0.996601	0.883292	1.24921	1.172	0.918019	0.823998
	0.976832	0.837603	1.03438	1.05181	0.803226	1.25536	1.4061	0.888676	0.94839
	0.723794	0.852256	0.97854	1.16998	1.08592	0.884453	0.964659	1.00309	0.830688
	0.907204	0.787313	1.27957	1.26712	0.874041	1.3331	1.15626	0.857325	0.872795
	1.73864	0.832708	0.91141	1.11245	0.776516	1.30988	1.01349	0.849604	0.885977
	1.07032	0.963757	1.09807	1.0658	0.889338	0.940088	1.52439	0.926228	0.832807
	0.995657	0.92144	1.18629	0.999691	0.818172	1.19514	1.01471	0.896506	0.724981
	1.07949	0.799115	1.25374	1.01545	0.997897	0.956955	1.23721	0.873382	0.82104
	0.862127	0.808299	1.03365	1.2412	0.955573	1.12101	1.24289	0.876124	0.741911
	1.22621	0.90497	0.963329	1.39921	0.890873	1.24515	0.938589	0.954998	0.819316
	1.00723	0.878135	0.961054	0.905957	1.03597	1.11466	0.929378	0.847512	0.866093
	1.05474	0.908473	0.945806	0.93409	0.824999	1.09861	0.919565	0.926941	0.936115
	0.912967	0.795691	1.10963	1.22109	0.897648	0.989818	1.14532	0.849323	1.03684
	1.36605	0.62176	1.13411	0.861825	1.24426	0.955128	1.03202	0.790354	0.950076
	1.03338	0.81888	1.02504	1.076	1.0567	1.02678	1.00776	0.915077	0.727321
	1.04278	0.907872	0.974787	0.91297	0.91145	0.939892	1.13909	0.867791	0.932111
	1.06515	0.764449	1.12492	0.865096	0.997642	0.917991	1.16301	0.932802	0.885812
	1.06697	0.820606	1.10022	1.21623	0.924024	0.955488	0.987393	1.12378	0.981227
	0.863331	0.912435	0.872273	1.0233	0.825749	0.863305	1.37243	0.905641	0.779993
	0.791472	0.89149	0.958424	1.33021	1.08951	0.91877	1.12722	0.904115	0.879198
	1.04928	0.797859	1.00477	0.984441	0.981152	0.939239	0.901901	0.800808	1.0633
	0.935825	0.881129	0.937256	0.90282	0.947091	1.1387	0.982647	0.89212	0.907768
	1.17035	0.781386	0.934438	0.913679	0.975092	0.947875	0.95867	0.893092	0.922091
	0.85765	0.878461	0.957501	0.876864	0.967817	1.2396	1.39381	0.963268	0.859587
	0.827626	0.759898	0.973439	0.839349	0.881517	0.953721	1.01731	0.827703	0.923575
	0.956849	0.844531	0.923447	1.1891	0.949727	1.14056	1.08286	0.753513	0.880599
	0.971211	1.07401	0.904442	0.841328	1.02278	1.21638	1.18994	0.904708	0.816739
	1.28903	0.803811	1.07212	0.866528	0.863255	0.958676	0.987207	0.944375	0.841378
	0.839643	0.896567	0.961319	0.942954	1.01893	1.21261	0.9389	0.812983	0.915451
	0.884415	0.818595	0.913941	0.900745	0.791285	1.16116	1.31346	0.931378	0.943741
	1.13645	1.04661	0.879518	1.05681	0.908491	1.21072	1.19942	0.873703	0.968955
	0.88616	0.884006	1.04017	0.913697	0.921471	1.23329	1.14714	0.840923	0.980407
	0.881827	0.8767	0.914259	0.822007	0.947483	1.0253	0.977745	0.982288	0.850964
	0.863244	0.89718	0.984742	0.864221	0.979764	1.00946	1.22068	0.826077	0.823542
	0.740628	0.799411	1.10327	1.57349	1.04313	1.21439	1.31296	0.977491	0.900301
	0.98995	0.758404	0.904885	1.15972	0.886695	1.16606	1.45654	0.870139	0.889335
	0.993341	0.987568	0.885131	0.880804	1.03258	0.982793	1.08977	0.918952	0.837611
	0.86223	0.944702	0.989653	1.0959	0.984241	1.08117	1.0888	0.931419	0.836729
	0.898149	0.864854	1.07243	1.24841	1.00459	1.12036	0.922892	0.792161	0.996931
	1.16529	0.727091	0.937894	1.01961	0.870317	0.990682	1.00495	0.823016	0.905114
	0.88256	0.783719	0.855625	0.83745	0.950418	0.921316	0.951619	0.837931	0.666015
	0.928038	0.861029	1.05387	1.01519	0.788477	0.889318	0.996285	0.960882	0.899985
	1.01516	0.797689	1.01262	0.848522	1.09743	1.14916	1.04914	0.756459	0.690157
	0.892728	0.692582	0.940431	0.822298	0.896608	0.966002	0.971463	1.00881	1.02752
	0.961429	0.813066	1.08485	0.911676	0.897758	1.38048	1.08268	0.867712	0.968898
	1.03894	0.845164	1.0021	0.997993	0.937398	0.955678	1.32197	0.726742	0.964683
	1.09766	0.852711	1.20192	1.05919	0.924205	0.943594	1.06613	0.734451	0.856935
	1.12876	0.726217	0.998364	1.04601	1.12717	1.28863	1.16078	0.989303	0.707256
	1.01776	0.806196	1.00969	0.884668	0.888402	1.25448	0.930986	0.844347	0.943419
	0.894293	0.882554	1.00971	0.831191	1.00451	0.981318	0.905987	0.821133	0.864674
	0.973874	0.771341	1.17948	1.27129	0.997285	1.05074	1.16053	0.842345	0.838275
	0.866156	0.908353	0.883866	1.02343	1.11264	1.18921	1.40572	0.98462	0.841202
	0.985837	0.784684	1.10995	0.841223	0.922315	1.1568	0.892632	0.829925	0.854266
	0.853022	0.771211	0.871108	0.899408	0.992938	1.33594	1.08729	0.859416	0.788662
	0.934499	0.72886	1.08063	1.02298	0.78068	1.17227	1.12563	0.852866	0.79015
	0.912794	0.828944	1.04008	1.08312	0.948877	1.15	0.920499	0.821602	0.821787
	0.712314	0.746112	1.27572	1.26406	0.851902	1.27721	1.27661	1.03179	0.952769
	0.866768	0.793665	0.891884	0.829661	1.04278	1.02761	1.38852	1.01487	0.843109
	0.96787	0.781911	1.05581	1.1337	1.16741	0.905002	1.21428	0.702102	0.822964
	1.25909	0.858868	0.933462	0.821467	0.72656	1.23846	1.09375	0.772749	0.675083
	0.778626	0.933611	1.08639	1.07456	0.985718	0.88944	0.924348	0.863158	0.936607
	1.06512	0.868396	0.848949	0.898279	0.818075	1.01351	0.934298	1.11793	0.809234
	0.843468	0.838688	0.989578	0.869301	0.823155	0.961124	1.15266	0.829945	0.789311
	0.739942	0.807857	1.17457	1.0641	0.766061	1.24209	1.15105	0.847734	0.834956
	0.912993	0.879555	1.75863	0.939872	0.922336	1.33671	0.969397	0.702277	0.812344
	0.771629	0.860912	0.859948	1.38397	0.806437	1.17829	0.897999	0.944469	0.965606
	0.951329	0.797803	0.918476	0.975367	1.0116	1.16288	1.18391	0.893174	0.765724
	0.810461	0.79083	0.956034	1.23218	0.929549	1.15476	1.07176	1.02226	0.711352
	0.938168	0.930539	0.926935	1.00426	0.969187	0.990996	1.16807	0.926241	0.95042
	0.846239	0.726729	0.97282	0.925505	0.849585	1.31113	1.06039	0.807123	0.830778
	0.889258	0.727877	1.11124	0.897438	0.97796	1.12838	1.13098	0.829695	0.967605
	0.900666	0.836291	1.10541	0.912962	0.799671	0.995436	1.08026	0.853336	0.798843
	1.21525	0.783413	1.05917	0.812479	0.924466	1.16492	1.08601	0.909401	1.09327
	0.996064	0.873032	0.903982	0.907198	0.883327	1.20937	1.08061	0.839826	0.774247
	0.943521	0.789529	0.892108	1.01466	0.869777	1.28475	1.43989	1.0193	0.922914
	0.892943	0.916145	0.971445	0.925122	0.944506	1.0507	1.1179	0.885352	0.890289
	0.897027	0.857274	1.12891	0.952879	0.866725	1.01629	1.18639	1.06009	0.946782
	0.946037	0.932495	1.08266	1.18623	0.933493	1.22176	1.19433	0.933078	0.878379
	0.925268	0.980688	1.20765	0.933986	0.839782	0.905636	1.28581	0.870251	0.821653
	1.08957	0.877926	1.04771	0.950026	0.835022	1.27066	1.40782	0.897586	0.968996
	0.985525	0.736652	0.878785	0.866011	0.80333	1.01487	1.18766	0.76205	1.04541
	0.943411	0.830557	1.0915	0.856931	0.988319	0.925686	1.18145	0.881062	0.880339
	1.03025	0.825912	0.823116	0.850413	0.811844	1.35348	1.51598	0.862677	0.802871
	0.947468	0.675771	1.04137	0.865054	0.93681	0.88644	1.36911	0.984606	0.95781
	1.06542	0.806337	1.43118	0.87389	0.856415	0.932735	1.16956	0.917681	0.817272
	0.745122	0.798318	1.09881	0.848459	0.901914	1.30583	1.1712	0.993891	0.956508
	0.993335	0.785673	1.33224	0.889734	0.936194	0.951795	1.07771	0.847071	0.946365
	0.94619	0.848595	1.06853	1.04542	0.907494	1.321	0.908954	0.784077	0.831125
	0.864049	0.882362	0.774824	0.996979	0.819682	1.18863	1.31054	0.964928	0.85599
	0.699769	0.962065	0.878501	0.96558	0.861034	1.17462	1.32407	0.845208	0.792205
	0.856857	0.898766	1.12885	0.867425	0.865627	0.919791	1.03277	0.942188	0.91585
	0.72569	0.754847	1.25105	1.27419	0.823527	0.919119	1.21233	0.803679	0.939847
	0.914794	0.984044	1.1165	0.869514	0.913597	1.10874	1.21814	0.798327	0.932207
	0.981058	0.816019	0.770835	1.26323	0.860522	1.33814	1.14003	0.961897	0.813573
	0.856843	1.15799	1.17332	0.932179	1.00635	1.10437	1.19831	0.898493	0.959147
	1.0771	0.747825	0.922109	1.10048	0.863658	1.17534	0.982833	0.763535	0.949781
	0.902897	0.977932	0.841034	1.39598	0.893348	0.987107	1.37554	0.8791	0.845629
	0.90044	0.768911	0.754255	1.19122	0.963257	1.19009	1.46497	0.923865	0.89432
	0.882715	0.888309	1.20962	1.17983	0.974111	1.25169	1.30412	0.940042	0.871275
	0.896833	0.85279	1.02114	0.927284	0.902455	0.875653	1.15076	0.909895	0.934065
	0.725681	0.750164	1.26797	0.884426	0.888404	1.15552	1.40076	0.89652	0.898063
	0.876715	0.819127	1.08123	1.11963	0.997014	1.20904	1.34336	0.827264	0.841602
	1.19702	0.862057	1.12029	1.28069	0.931257	1.07714	1.20454	0.865341	0.946256
	0.833901	0.816838	1.2902	1.47162	0.839046	0.946468	1.29483	0.988225	0.846005
	1.02536	0.979815	1.16387	1.13501	0.816789	1.11368	1.19132	0.896413	0.927994
	0.696945	0.823434	1.22775	1.16695	0.981232	1.07877	1.10133	1.00115	0.807396
	0.970334	0.928643	1.0367	0.923472	0.859942	0.972223	1.23568	0.968887	0.829041
	0.910308	0.819949	1.19576	1.17193	0.747351	1.32233	0.985765	0.919844	0.824229
	1.02873	0.878762	1.04463	1.09335	0.894145	1.05631	0.925019	0.974031	0.885866
	0.795996	0.902544	1.10438	1.16416	0.861228	1.14738	1.10576	0.949531	0.849324
	0.940284	0.827013	1.15714	1.06582	0.872869	0.944471	0.977081	0.880371	0.911985
	0.984956	0.68172	1.03184	1.07467	0.817159	0.986291	1.01911	0.969791	0.918108
	0.90677	0.745059	0.999103	1.28997	1.06772	1.27601	0.959345	0.894709	0.938691
	0.752454	0.703569	0.930783	1.28538	0.931336	0.928985	1.25116	0.896515	0.800853
	0.837912	0.665442	0.962669	1.01283	0.942176	0.897471	1.35209	0.887998	0.925633
	0.961211	0.670912	1.12307	0.95426	0.878667	0.925453	1.35726	0.901188	0.886141
	0.739767	0.704614	0.95384	0.922087	0.903167	1.37214	0.949948	0.929647	0.939435
	0.950919	0.748994	1.19785	0.933709	0.824551	1.45575	1.33281	1.01818	1.38848
	0.853586	1.02944	0.879038	0.887582	0.85112	0.904579	1.05142	0.919957	0.879003
	0.838057	0.891305	0.885038	1.12172	0.926323	1.54568	1.14271	0.847661	0.82789
	0.873076	0.798492	1.16914	0.898034	0.871798	1.40779	1.29497	0.952322	0.966366
	0.790329	0.860828	0.953691	1.00186	0.845282	1.10513	1.02708	0.895152	0.938908
	0.932019	0.73796	1.01558	1.16764	0.972611	1.28209	1.27221	0.800186	0.723312
	0.962399	0.881188	0.957446	1.14325	0.946103	1.05727	1.0266	0.864017	0.917471
	0.873122	0.901917	0.78497	0.92358	0.948589	0.894722	1.22936	0.627284	0.873088
	0.911779	0.830473	0.862869	1.2086	0.973371	1.29717	1.26374	1.04184	1.07653
	0.842166	0.85617	1.09855	0.899968	0.863643	1.20904	1.2025	0.856942	0.927456
	0.843845	0.891193	0.799078	1.24063	0.782618	1.05745	1.30197	0.897226	0.728526
	0.967958	0.744682	0.956552	0.887731	0.86208	0.92981	1.14296	0.946653	0.947247
	0.821823	0.710238	0.892469	0.947547	0.909842	1.21158	0.97602	1.00026	1.00724
	0.942049	0.997946	0.944509	0.941301	0.82295	1.46454	0.99828	0.871291	0.927526
	0.92847	0.828988	0.964858	0.918802	0.822758	0.96904	0.984007	0.795207	0.9384
	1.05464	0.812627	1.28293	1.22141	0.883385	1.07597	0.888991	0.983372	0.839459
	0.99344	0.980244	0.992003	0.881494	0.935241	1.28682	1.26721	0.787896	0.957984
	0.998181	0.741853	0.936232	1.07119	0.969383	1.5803	1.36115	0.918163	0.911054
	1.02639	0.839838	0.957499	0.864466	0.872055	1.27755	1.00088	0.966285	1.02498
	0.997445	0.836441	0.963967	1.21102	0.804463	1.09082	1.33861	0.75507	0.781176
	0.823887	0.925018	1.08021	1.10379	0.760671	1.1269	1.06336	0.897067	0.881008
	1.13482	0.804052	1.26629	0.910235	0.907126	0.945854	1.14918	0.880294	0.934331
	1.0757	0.898503	1.26836	0.945338	0.835234	1.20693	1.09205	0.915659	0.872212
	1.08262	0.837429	0.955146	0.931431	0.735906	0.908124	1.03891	0.867595	0.929732
	0.935208	0.806082	0.797791	1.16065	0.842787	1.31793	0.933953	0.998929	0.840126
	0.941771	0.835242	1.14851	1.06061	0.891905	0.923531	1.24456	0.844983	0.895631
	0.999799	0.695864	1.18045	0.937482	0.811823	0.890805	1.12247	0.866015	1.03795
	0.888601	0.704729	1.03028	1.01599	0.82008	0.915978	1.20131	0.953537	0.841696
	0.939594	0.674426	0.968433	0.93412	0.859923	1.07373	0.977956	0.864921	1.09255
	0.985123	0.742664	0.923409	0.916462	0.936927	1.69851	1.52334	0.934564	0.747666
	0.988984	0.853138	1.20358	1.32182	0.927283	1.04789	0.96891	0.906967	0.871826
	0.89223	0.725275	1.05226	0.972361	0.989424	1.31436	1.44092	0.900314	1.00499
	1.01805	0.971789	1.03683	1.0841	0.913386	0.960557	1.03137	0.955174	0.768925
	0.963684	0.776635	1.26331	0.918106	1.0064	1.07519	1.02623	0.999149	0.865075
	0.926761	0.877422	1.2142	1.09918	0.965456	1.10482	1.41598	0.877369	0.880023
	0.927302	0.882108	1.16531	0.913523	0.881607	1.44064	1.15204	0.900386	0.863377
	0.867303	0.697006	1.1632	0.920834	0.898901	1.0564	1.27402	0.985278	0.931161
	0.965012	0.82815	1.22503	0.905149	0.874378	0.937206	0.879248	0.783067	0.963456
	1.13492	0.903562	0.869894	0.936399	0.884207	0.946867	0.982482	0.8512	0.959413
	0.945032	0.82768	0.876397	0.972817	1.06958	1.33237	0.895086	0.910518	0.944606
	0.964795	0.803267	1.07757	1.03794	1.0996	0.919925	1.5016	0.944963	0.857552
	0.853796	0.715233	0.793071	0.929971	0.893139	1.10942	1.46086	0.950836	0.94613
	1.05426	0.996177	1.04384	0.926958	0.841497	1.23393	0.911086	0.904057	0.825638
	0.882507	0.788866	1.21849	1.04982	0.857655	0.906739	1.25711	0.901949	0.949619
	0.882158	0.873991	0.814243	0.916294	0.919598	1.43668	1.74026	0.898341	0.880197
	0.930702	0.707457	1.20165	0.921364	0.693482	1.18369	1.12022	0.847138	0.821966
	0.83205	0.874189	1.16894	0.902165	0.890087	0.992583	1.42623	0.888467	0.912342
	0.993411	0.766317	1.02699	1.19932	0.715136	0.952273	0.996066	0.882635	0.884582
	0.916943	1.05297	1.1063	1.1219	0.928371	1.53249	0.971921	1.07559	0.930384
	1.01308	1.06297	0.93531	0.858454	0.916241	1.30048	1.23742	0.972487	0.947491
	0.857132	0.896901	0.958717	0.933638	1.03623	1.6287	1.50189	0.84214	0.919012
	1.08205	0.683946	1.17722	0.915832	0.691249	1.25978	1.24188	0.983184	0.837023
	0.881208	0.865785	0.998595	1.11399	0.901688	1.01909	1.0462	0.934588	0.985911
	0.929641	0.694025	1.1205	0.912957	0.890507	0.940397	1.05868	0.789665	0.856518
	0.898917	0.800825	0.80656	1.06351	0.825336	1.0904	0.933025	0.841562	0.894554
	0.821431	0.889296	0.888325	0.92816	0.956849	0.997002	0.901546	0.989408	0.865416
	1.03091	0.846913	1.16123	0.89204	0.980761	0.872641	1.14653	0.884931	0.884891
	1.24047	0.864111	0.978131	1.09156	0.944576	1.17357	1.49629	0.942313	0.935815
	0.725612	0.820372	1.0437	0.926376	0.817925	1.04717	0.916313	0.833469	0.765622
	0.724038	0.7217	0.817958	0.952142	0.802043	0.980342	0.890608	0.905735	0.786103
	0.686046	0.709124	0.820268	1.06188	0.853222	1.25152	0.920835	0.802598	0.945091
	1.00758	0.661749	0.989234	1.12568	0.797923	0.941193	0.913929	1.00025	0.801435
	0.742234	0.830639	0.829758	0.914605	0.985722	0.883458	1.18517	0.735453	0.922555
	1.1504	0.678748	0.867484	0.969748	0.970127	0.861081	1.24131	0.976158	0.844902
	1.12693	0.762912	1.15241	0.907575	0.901116	0.926531	0.9013	1.07862	0.798961
	0.695697	0.859356	1.08956	1.30322	0.875063	0.893865	0.938299	0.772785	0.890721
	0.798528	0.701228	0.992462	0.962492	0.704527	1.05059	0.916794	0.87465	0.811287
	1.00735	0.805084	0.9262	0.912766	0.718636	1.11823	0.941565	0.920174	0.922362
	0.817604	0.813632	0.810045	1.07333	1.0346	1.40355	1.07184	0.874142	0.93544
	0.985161	0.746283	1.05211	0.941664	0.716307	0.898985	0.945161	0.880666	0.827468
	1.04856	0.851445	0.968054	1.10099	0.753384	1.04578	0.898327	0.899514	0.824856
	0.875848	0.763313	1.02884	1.22001	0.848142	1.61255	0.906934	0.840782	0.819468
	0.910763	0.888761	1.02404	0.919534	0.88684	0.971688	0.896149	0.942457	0.816024
	0.896377	1.10446	0.850114	1.2509	0.684264	0.961021	0.917641	0.883653	0.947823
	0.951658	0.882684	0.915519	0.942795	0.965698	0.98697	0.891632	1.1638	0.746689
	1.00457	1.09035	1.08747	0.962366	0.92334	0.957498	0.911823	0.875105	0.903813
	0.948765	1.26201	1.05364	0.975953	0.982199	1.19165	0.981478	0.890323	0.840897
	0.690222	0.9807	1.13425	0.946165	0.801958	0.97468	0.925742	1.13409	0.866068
	0.759012	0.661191	1.17203	0.975286	0.864011	1.18527	0.866204	0.955056	0.848779
	1.01082	0.975195	0.876947	0.941309	0.922897	1.01829	0.908696	0.800549	1.01234
	0.867405	0.774814	0.911015	0.912645	0.967226	0.886408	0.952945	0.759711	0.860567
	0.732204	0.829184	1.14142	0.948945	0.867253	0.946999	0.915407	0.879367	1.02704
	0.813766	0.91208	1.24191	1.0258	0.857053	1.1108	0.990389	0.847044	0.82927
	1.00365	0.918101	0.824816	0.921343	0.792219	0.970164	1.16519	1.02635	0.853624
	1.04198	0.743225	0.856501	1.14911	0.82561	1.40632	0.975455	1.0335	0.925928
	0.646086	0.906838	0.802974	0.902737	0.959755	1.4422	0.934583	0.88109	0.983453
	0.989824	0.796302	0.835364	0.944424	0.853962	1.31851	0.98856	0.829531	0.759
	0.962727	0.840774	0.918506	1.14585	1.00202	0.985293	0.884372	0.725667	0.797912
	0.940712	0.983961	1.00601	0.968005	0.866469	1.12179	0.874982	0.801595	0.967436
	0.998371	0.789724	1.02733	1.13762	0.953456	0.954293	0.933687	0.842	0.784786
	1.15452	0.836828	1.25805	1.13674	0.800008	1.01901	0.906223	0.972473	0.896431
	0.831131	0.879458	1.42378	1.33579	0.940476	0.985175	1.25159	0.989854	0.966574
	1.00937	0.697406	1.43827	0.923977	0.720728	1.47471	0.937686	0.917502	0.919508
	1.06118	0.776464	1.27737	0.922749	0.915397	0.9457	0.914039	0.837159	0.953657
	0.956898	0.706535	0.895041	0.904989	0.924819	1.29533	1.24519	0.910948	0.872095
	0.915186	0.957966	1.18107	1.13885	0.876535	1.18031	0.90021	0.846764	0.820354
	0.880711	0.726988	1.07124	1.40555	0.997395	0.993144	0.919418	0.93192	0.8629
	0.685196	0.968757	0.814709	0.920305	0.766691	1.44827	0.915359	0.950552	1.15267
	0.832703	0.994056	1.06703	1.36275	0.970039	1.19534	1.17853	0.845501	0.927115
	1.02468	0.676861	0.82504	0.950141	0.909797	1.01356	0.992178	1.00144	0.834967
	0.880463	0.770097	0.887472	0.925754	0.801991	1.17454	0.955338	0.942332	1.09652
	1.13471	0.913219	0.887854	0.908738	0.795163	1.04548	0.970358	0.909464	0.885609
	1.14324	0.794692	0.772832	0.889396	0.919391	1.0615	1.19061	0.890328	0.917751
	0.819528	0.71823	0.902512	1.31683	0.875099	0.963937	0.849763	0.839864	0.833034
	0.67877	0.736401	1.03558	1.03822	0.780607	1.37555	1.07245	0.979294	1.03057
	0.799763	0.840105	0.924919	1.03994	0.842389	0.976797	1.12121	0.716712	0.968612
	0.958929	0.836348	0.917316	0.920219	0.826636	0.942833	1.07972	0.813473	0.776332
	1.04314	0.860167	0.978831	1.01496	0.841781	1.17473	1.45757	0.93569	0.91158
	1.04264	0.737064	1.11263	1.18551	0.973952	0.996462	0.90217	0.9594	0.907231
	1.22945	0.901938	1.11012	0.896896	0.851425	1.455	0.902286	0.922981	0.778276
	0.917062	0.928781	1.11567	0.9617	0.768505	0.972872	1.05531	0.826099	0.836689
	1.02374	0.925797	0.884461	0.902131	0.783912	1.01971	0.971567	0.937664	0.744228
	0.916924	1.02945	0.905315	1.01701	0.757647	0.946321	1.162	0.973108	0.898149
	0.848752	1.01302	0.99941	0.941307	0.883376	0.960264	0.95881	0.799075	0.919564
	0.923721	0.720444	1.04138	0.952275	0.854531	0.942006	0.986053	0.856382	0.932773
	0.982463	0.982015	0.804828	1.12192	0.85984	0.926141	1.12521	0.890621	0.748684
	0.846099	0.790847	0.957267	0.916211	0.853925	0.91201	1.21091	0.873272	0.918648
	1.00832	0.971261	0.980198	1.0217	0.859999	1.21051	1.00051	0.838419	0.709369
	0.993164	0.891887	0.845558	0.97188	0.987705	0.985443	0.956138	0.832296	1.03937
	1.24035	0.747668	0.970938	0.98585	0.630794	1.27922	0.916983	1.03191	0.840802
	0.985309	0.934128	1.15999	0.946486	0.649629	1.29389	1.02728	0.825326	0.881571
	0.965972	0.83655	0.986027	1.27763	1.01532	0.903391	0.959052	0.838941	0.899259
	1.06076	0.960672	1.01988	1.0044	0.855778	1.04963	0.928689	0.922962	0.776915
	0.879972	0.793405	1.29457	0.906295	0.863342	1.11277	0.905581	0.81693	0.79332
	1.05419	0.931784	0.893441	1.24981	0.824921	0.92254	0.955004	0.849936	0.769749
	0.904963	0.747959	0.85405	0.937114	1.13529	0.948223	1.04562	0.750315	0.85896
	1.03234	0.780609	1.3082	1.08871	0.777367	1.28814	0.895007	0.894798	0.760137
	0.792281	0.737925	0.983382	0.945468	0.808756	1.06984	1.11961	0.885606	0.870475
	0.948081	0.854033	1.02813	1.03282	0.982297	1.02325	0.952294	0.821075	0.958735
	0.798718	0.743597	1.16863	0.935574	0.880906	1.12891	0.887957	1.00964	0.787768
	1.126	0.871587	0.866367	1.04607	0.880488	1.0615	1.0425	0.761211	0.891848
	1.00219	0.876002	0.864343	1.34827	0.856925	0.986515	0.95617	0.941582	0.850688
	0.964757	0.796839	0.899344	0.935093	0.916103	1.25088	1.08067	0.876521	0.896876
	0.890109	0.81147	0.88534	0.961732	0.883991	1.13219	0.945388	0.918387	0.928764
	0.920918	0.873435	1.03678	1.08103	1.01608	1.18949	0.883498	0.841457	0.731557
	0.935448	0.764259	0.815295	0.902882	0.810231	1.24392	0.886536	0.822577	0.760565
	1.04104	0.737769	1.0409	0.937646	0.836009	1.09744	1.13271	0.919115	0.805167
	0.985161	0.722784	0.856708	0.905152	0.796011	0.947353	0.92888	0.928732	0.96279
	1.04273	0.933781	1.05187	1.03014	0.906903	1.07267	1.03144	0.992814	0.816866
	0.927088	1.01792	0.848307	0.922404	0.911349	1.13728	1.13054	0.844338	0.937733
	1.16137	0.733018	0.782983	1.16568	0.952393	0.892634	0.901044	0.820265	1.01935
	1.03798	0.770877	1.08694	0.936102	0.850105	0.943701	0.887188	0.923057	0.86278
	1.06233	0.819738	0.838403	1.03522	0.840584	1.15426	1.35107	0.667472	0.842467
	0.910259	0.920316	0.884107	0.950937	0.955052	1.15798	0.892105	0.994167	0.832206
	0.903636	0.815791	0.976655	1.17889	1.11197	1.07164	1.34435	0.889635	0.903852
	0.913043	0.957244	0.824512	1.17854	0.879127	1.35609	1.28287	0.843969	0.965257
	1.00682	0.864184	0.872347	0.894237	0.90521	0.949981	0.891016	0.884902	0.853638
	1.00145	0.921772	1.0813	1.04666	0.974003	0.904559	0.992543	0.861617	0.792034
	1.0748	0.801046	0.902963	1.45012	0.990319	1.30406	0.873732	0.808304	0.764948
	0.76862	0.818831	1.06697	0.93232	1.02505	1.07024	0.915313	0.970547	0.823224
	0.982969	0.863265	1.0639	0.956381	0.950548	1.00478	0.902841	0.924544	0.848072
	0.822528	0.902385	1.12289	0.945038	0.905863	1.39346	0.899029	0.879827	0.808497
	1.07846	0.707212	1.01867	1.20369	0.792289	1.03551	0.927864	0.840868	0.928049
	0.947441	0.64013	0.965635	1.15112	0.855523	0.938687	0.930273	0.892181	0.872316
	1.06704	0.730095	0.83025	1.26846	0.979104	0.945416	0.981102	0.851273	0.786648
	0.896898	0.714075	0.920352	0.93541	1.00568	0.966163	1.06882	0.916912	0.957684
	1.05708	0.914878	0.832952	1.03135	0.901216	1.27448	0.891993	0.954369	0.96127
	0.690256	0.753224	0.808029	0.95264	0.92279	1.02535	0.941322	0.879383	0.870982
	0.828427	0.978215	0.84753	0.91206	0.78126	1.27441	0.924771	0.667625	0.880193
	1.0146	0.707866	1.10938	0.979404	0.840211	1.29046	0.957865	0.89903	0.724096
	0.951173	0.873419	0.973181	0.855611	0.700383	1.24809	0.955913	0.779842	0.769383
	0.815159	0.908423	0.926025	0.896455	0.957033	0.982063	0.915003	0.872817	0.890753
	0.878162	0.751599	0.845165	0.951089	1.15227	1.13025	1.08355	0.811479	0.918617
	1.0292	0.655334	0.862641	1.16509	0.931222	1.18011	1.17755	0.869159	0.834496
	1.0592	0.885081	0.826881	0.87921	0.79649	1.10296	0.932874	0.902265	0.989976
	1.17545	0.806704	1.08145	1.05822	0.780979	1.21848	0.900964	0.778986	0.865989
	0.753242	0.937233	0.810295	0.971538	0.921049	0.987397	0.926162	1.07145	0.800284
	0.964738	0.843484	0.763884	1.09667	0.864851	0.952156	0.927826	0.87943	0.773991
	0.782436	0.656028	0.840354	0.949615	0.926731	1.03993	0.912887	0.823633	0.776435
	0.987974	0.849737	0.895632	0.931166	0.820794	1.06853	0.875777	0.878423	1.03246
	0.8137	0.747733	0.832207	0.909368	0.837593	0.958247	0.945543	0.91297	0.851054
	0.92721	0.838558	0.848212	1.02635	1.11893	0.954865	1.19715	0.899432	1.0004
	0.64278	0.874068	1.20185	1.20422	0.851159	0.972526	0.874279	0.85898	0.715313
	1.04093	0.836573	0.84352	1.03045	0.893411	1.16136	1.32508	0.945987	0.838325
	0.767566	0.742634	1.16917	1.21257	0.977417	1.29256	1.30097	0.95046	1.04175
	1.1685	0.834611	1.17891	0.887887	0.848206	0.92259	1.54683	0.75791	0.952154
	1.02793	0.742814	1.00674	0.888072	0.942265	1.12546	0.930928	0.979153	0.788014
	1.23039	0.962848	0.877591	1.24867	0.854139	0.977203	1.15251	0.801979	1.00552
	0.892885	0.6309	1.28767	0.935588	0.951408	1.10695	0.903196	0.939518	0.809819
	0.938181	0.620635	0.821696	0.876795	0.828525	1.07043	1.08674	1.08956	0.868766
	1.03303	0.772056	0.813843	0.94439	0.879878	0.925417	0.94706	0.902271	0.763172
	0.864724	0.750379	0.77858	1.01325	0.867704	1.25739	1.00485	0.923749	0.80634
	0.740076	0.743801	1.02713	1.14742	0.875639	0.919917	1.33322	0.98807	0.856456
	0.971993	0.741793	0.889059	0.885266	1.00602	1.16565	1.04777	0.887492	0.963558
	1.1194	1.04095	1.18058	1.03223	0.852493	1.37539	1.03642	0.854615	0.947363
	0.771264	0.694116	0.829624	1.00325	0.973596	1.0493	0.958287	0.965551	0.950502
	1.01202	0.661226	1.07658	0.975744	0.885102	1.27053	0.910624	0.920112	0.793358
	0.806473	0.782905	0.814401	0.886746	1.02108	1.10474	0.975837	0.829974	0.691303
	1.02693	0.74442	1.04362	1.07563	0.883378	1.49505	1.10103	0.848459	0.873371
	0.932982	0.650477	1.07026	0.886562	0.91197	1.13224	0.957396	0.960928	0.733055
	1.01181	0.776204	0.786045	0.90412	0.822095	1.15349	1.01108	0.957651	1.01767
	1.16166	0.6706	0.960433	1.20993	0.793653	0.967059	0.953882	0.783012	0.726473
	0.906096	0.842679	0.87824	0.88974	0.931804	1.10295	0.934417	0.742281	0.803138
	0.905142	0.916178	0.75855	0.977738	0.920657	0.926698	1.13207	0.884219	0.929063
	1.01706	0.867632	0.926571	0.977609	0.99525	1.40255	0.918762	0.795796	0.902477
	0.944116	0.762131	1.08982	1.07407	0.950999	0.924319	0.932829	0.905662	0.86237
	0.924299	0.732537	1.13907	1.19432	0.805444	1.50008	1.23881	0.862141	0.957618
	1.02107	0.896933	1.25716	1.04345	0.879213	1.37369	0.918852	0.806944	0.845869
	0.877197	0.961527	1.20951	1.44859	0.936734	1.1277	0.908506	0.852921	0.792006
	0.974207	0.755359	0.820352	0.953611	0.867096	1.08274	0.97195	0.948227	0.969914
	1.03453	0.909111	1.1938	0.909075	0.840125	1.11716	1.11535	0.847362	0.825322
	0.89416	0.86465	0.918749	0.983419	0.815275	1.17069	1.00665	0.907828	0.792634
	1.03873	0.806161	1.02514	0.899013	0.868383	1.41891	1.00075	0.823577	0.809355
	0.934583	0.860046	0.804149	1.48279	0.805478	1.57956	1.37996	0.910044	0.872998
	0.777872	0.705224	0.914046	0.92643	0.765285	1.04198	0.873935	0.918291	0.75512
	0.792976	0.693211	0.809754	1.09815	0.974537	1.05207	0.928527	0.699791	0.916459
	0.777774	0.876089	0.92648	0.919631	0.934582	1.4282	1.16313	0.92134	0.838732
	0.997536	0.897912	1.24605	1.09649	0.827476	1.34661	0.919472	0.85414	0.853383
	0.995122	0.825224	0.896081	0.922203	0.904985	1.56054	1.23377	0.802139	0.862405
	1.01674	0.741819	1.08555	1.02164	0.882418	1.43414	0.903332	0.959583	0.821497
	0.83697	0.723675	0.852532	1.03058	0.956865	1.06473	1.15915	0.911237	0.860251
	1.00823	0.710816	0.797072	0.941458	0.780259	1.13557	0.939282	0.924526	0.871517
	1.01365	0.891919	1.01943	1.25386	0.851667	0.980889	0.958025	0.749261	0.788744
	0.728304	0.885751	0.820988	0.917199	1.00129	1.44613	1.03696	1.04823	0.844827
	0.91266	0.812276	0.961625	0.922009	0.888089	1.00906	1.17571	0.929908	0.754298
	1.12716	0.765866	0.974846	1.09257	0.836491	0.964667	1.01517	0.945622	0.771314
	0.908953	0.815533	1.38314	0.906689	0.764332	1.12496	1.21823	0.921469	0.884895
	0.839099	0.809605	0.797358	0.971723	0.826483	1.35885	1.3012	0.897998	0.78276
	0.778786	0.761637	1.21721	1.15772	0.737852	1.34481	1.12983	0.928264	0.925871
	0.967986	0.83738	0.771277	0.902793	0.83768	1.10548	0.953338	1.01492	0.912616
	0.965367	0.846883	1.1819	1.03791	0.885236	1.00826	1.34574	0.892215	0.825121
	0.885972	0.824838	0.725097	0.958563	0.844928	1.17319	0.967629	0.8295	0.71095
	1.08942	0.855025	0.803706	0.917476	0.930589	1.1574	1.26731	0.987638	0.845894
	0.843983	0.825856	1.07319	0.903503	0.871483	1.06729	0.889224	0.825396	0.835673
	1.00788	0.889295	0.787934	1.00591	0.923712	0.972443	1.13433	0.933685	0.926316
	0.893588	0.879253	0.849038	0.873636	0.925666	1.24561	1.40524	0.860075	0.886107
	0.989396	0.818497	1.3057	0.933852	0.906356	1.64798	1.04586	0.917865	0.879466
	0.846526	0.832307	1.47638	0.913095	0.862642	0.91205	1.53738	0.898801	1.00779
	0.930643	0.866399	0.748704	1.0383	0.833594	1.02145	0.908544	0.953258	0.884355
	0.745097	0.836001	1.26769	1.05452	0.911743	1.09847	0.956205	0.941481	0.70358
	0.899788	0.824273	0.784558	0.897664	0.93238	1.33061	0.895596	0.940249	0.889463
	1.05595	0.821259	0.829084	1.03948	0.849786	1.05971	1.0657	0.878722	0.702725
	0.717138	0.77402	0.767147	0.908464	0.880594	1.13096	1.38678	0.886844	0.724502
	0.682794	0.799825	0.885617	1.11154	0.901266	1.08644	1.2853	0.938713	0.928797
	0.940825	0.848719	0.94111	1.0598	0.913486	1.22659	0.8513	0.885223	0.900421
	1.04728	0.862674	1.07831	1.15716	0.807001	1.07356	0.910089	0.998419	0.984921
	0.859526	0.861565	1.48331	1.00907	0.836067	1.32132	1.20932	0.818691	0.937064
	1.01126	0.827645	0.954614	1.24639	0.860967	1.01557	0.871612	0.942376	0.911801
	0.862155	0.895379	0.799911	0.930542	0.870705	1.33827	0.927451	1.0216	0.967412
	0.930589	0.662934	1.51046	0.99724	0.878375	1.30376	1.27872	1.11347	0.873841
	1.08731	0.899649	1.0696	0.935258	0.63938	1.30018	1.30943	1.09018	0.890453
	1.06139	0.778972	0.913715	1.22547	0.821319	1.01475	1.13688	0.908901	0.931537
	0.888288	0.753919	0.819918	1.364	0.802434	1.20545	1.33624	0.867955	1.0157
	0.82795	0.786027	1.1623	0.922208	0.78452	1.11418	1.26581	0.893829	0.809249
	1.00265	0.725306	1.16098	0.968402	0.881144	1.07308	1.46979	0.804088	0.873183
	0.991935	0.783513	0.869256	1.12589	0.824711	1.16587	0.896678	0.895291	0.789102
	0.905626	0.746634	1.08621	1.39005	0.893672	1.22966	1.08311	0.821782	0.916473
	0.91424	0.898062	0.836309	1.0031	0.706537	1.44329	1.31623	0.977742	0.943579
	0.970718	0.796954	1.18924	0.925776	0.904391	1.12097	1.04224	0.778542	1.00757
	0.8826	1.05416	1.0063	1.16708	0.833681	1.02347	0.944542	0.905068	0.959403
	0.755433	0.842725	0.961017	0.987561	0.83799	0.977357	1.16179	0.846887	0.950828
	1.0558	0.779039	1.14124	0.887461	0.764504	1.29362	0.919992	0.900466	0.922996
	0.910213	0.803527	1.01642	0.978441	0.911926	1.28327	1.24902	0.927797	0.945695
	0.971321	0.849287	1.10382	0.920424	0.869753	0.947836	0.83104	0.809134	0.848089
	0.769668	0.863184	0.986924	1.29342	0.84121	1.03129	1.36078	0.953671	0.862897
	1.00804	0.807443	1.08319	1.0035	0.975001	1.36639	0.893953	0.940796	0.819717
	0.759501	0.781879	0.852911	1.0446	0.803632	1.25293	1.26358	0.82881	0.832368
	1.19992	0.757464	1.30383	1.20796	0.906133	1.38951	1.38359	0.890383	0.749206
	0.841704	0.683295	1.13013	0.95134	0.714722	1.08385	1.37464	0.862744	0.82593
	1.02688	0.666553	0.932743	1.05844	0.918583	1.37181	1.3765	0.949137	0.841126
	0.917439	0.874476	0.840424	1.33103	0.945199	1.39753	1.22988	0.913997	0.909361
	0.951274	0.759771	0.841708	0.965331	0.823622	1.08256	1.1048	0.861383	0.737881
	1.0505	0.767775	0.83775	0.943961	0.847593	1.03834	0.968579	1.02922	0.837728
	0.8917	1.07833	0.813821	1.17538	0.946228	1.0072	1.03847	0.856423	0.779486
	0.830512	0.723269	0.831569	0.916662	1.2962	1.29004	0.893491	0.824079	1.05431
	1.25989	0.840947	1.07808	0.901865	0.906125	1.22299	1.22047	0.812482	0.72593
	1.02564	0.912389	0.961513	0.946423	0.704079	1.17843	1.10973	0.884072	0.853477
	0.777327	0.751717	1.11597	1.26279	0.757583	1.00087	1.33195	0.831129	0.733382
	1.00752	0.897443	1.06573	0.890444	0.941807	1.18722	1.08089	0.840269	0.858686
	0.82815	0.783739	1.02435	0.899493	0.845924	1.3623	1.32866	0.759539	0.955734
	0.964823	0.844876	0.972524	1.42642	0.823953	1.43568	1.21093	0.926994	0.874779
	0.857809	0.82191	0.872311	1.15464	0.919058	1.29541	1.31303	0.820777	0.866719
	1.27546	0.866378	1.11475	0.948124	0.780942	1.05114	1.28333	0.950107	0.8391
	1.00151	0.762737	0.970597	1.1357	0.790883	1.1876	0.869754	0.900021	0.83624
	1.22257	0.742107	0.932469	1.29102	0.786539	1.5159	1.26621	0.779271	0.845474
	0.966333	0.80051	0.99377	1.1039	0.975106	1.42322	0.998046	0.783101	1.0188
	0.905622	0.976401	0.835471	1.25413	0.804701	1.12334	1.30841	0.88938	0.834819
	0.848545	0.736936	1.00759	0.886627	0.843307	1.2664	1.25051	1.04192	0.942615
	0.839537	0.956449	1.03751	1.19397	0.900448	1.1961	1.04615	0.906199	0.736208
	1.1053	0.803419	1.05542	1.21099	0.894246	0.963113	1.41715	0.984087	0.910278
	0.857871	0.876682	1.03495	1.23975	0.977142	0.957272	1.30511	0.979627	0.850076
	0.820259	0.843154	1.24944	0.934812	0.713379	1.12019	1.24033	0.953246	0.819045
	0.994323	0.767637	1.10353	0.927842	0.915293	0.979569	1.61942	1.00131	0.968793
	0.800858	0.709136	0.787121	0.904908	0.650237	1.47428	0.907923	0.928765	0.938363
	0.996665	0.805323	0.920882	1.03487	0.804817	0.938015	0.913869	0.873658	0.728967
	0.961092	0.756112	0.768439	1.03448	0.945361	0.998231	1.21438	0.806173	0.721234
	0.996614	0.904362	1.08745	1.31183	0.940799	0.970702	1.04637	0.965805	0.786731
	0.899499	0.860155	1.13739	0.973418	0.967803	0.973148	0.98654	0.822796	0.908804
	0.811923	0.687651	0.896656	0.905726	0.96312	1.14881	1.07475	0.806665	0.871825
	0.727844	0.666433	0.774573	1.0172	0.808409	0.955245	0.926997	0.722056	0.800467
	0.74433	0.834199	0.987101	1.15518	0.873555	0.970306	0.942776	0.872041	0.693047
	0.956613	0.807221	0.843883	1.04231	0.758778	1.45186	1.4868	0.761491	0.917605
	1.11403	0.973376	1.04515	1.2341	0.994539	1.2542	1.2011	0.884123	0.809007
	0.798437	0.813844	0.964962	0.907919	0.870191	1.16384	0.929603	0.704969	0.865337
	0.816562	0.939398	0.778983	0.899511	0.989963	1.3113	1.04881	0.821686	0.742051
	0.790617	0.909054	0.840616	0.915344	0.776832	0.993619	0.878858	0.816836	0.878946
	0.723146	0.741006	0.80472	0.953503	0.958194	1.02238	1.24041	0.879468	0.883337
	0.895412	0.801106	0.905246	1.02859	0.733919	0.944402	0.894126	0.946266	0.87066
	0.946015	0.969505	0.787966	1.38233	0.849333	0.938791	0.934165	0.890091	0.862591
	0.907464	0.696698	0.999757	1.3456	0.970261	1.11552	1.12323	0.898543	0.8286
	0.799774	0.818504	0.992277	0.967275	0.790071	0.982007	0.943971	1.04882	0.768486
	0.85394	0.835983	0.943473	0.907154	0.65899	0.98581	0.914047	0.897165	0.909121
	0.76247	0.813319	1.10748	0.931882	0.880148	1.13781	0.960312	0.907351	0.837826
	0.977525	0.900831	1.01405	0.925893	0.869352	1.12674	0.946819	0.967806	0.936058
	0.814543	0.698961	0.805449	1.36822	0.936229	0.971843	0.92254	0.920486	0.820569
	0.907471	0.840214	1.03542	1.1429	0.820954	1.2002	1.0885	0.866516	0.90637
	0.976594	0.844799	0.793165	0.982702	0.774008	1.35074	1.02267	0.888186	0.790957
	1.04307	0.76779	0.782836	1.12071	0.85863	0.954495	0.926638	0.82967	0.944575
	0.995177	0.720481	0.914138	0.997134	0.827054	1.03973	0.95534	0.86364	0.75924
	0.824637	0.814471	0.985756	1.22602	0.888791	1.03611	1.10603	0.964918	0.888568
	1.05585	0.806602	1.10515	0.882034	0.827225	1.05656	1.06921	0.821884	0.959299
	1.05864	1.37623	0.850661	1.18974	0.828726	1.03428	0.892481	0.913246	0.810033
	0.85714	0.962097	1.13163	1.05303	0.877186	0.968186	0.918047	0.947645	0.895027
	0.977531	0.776069	0.773489	1.16744	0.95871	1.55794	0.925089	0.795582	0.855494
	0.905022	0.758093	1.31143	0.893929	0.782355	0.993552	1.12898	0.896352	0.850327
	0.876578	0.71568	0.85164	0.957877	0.855765	1.19636	0.985876	0.921084	0.898854
	0.930872	0.963826	0.758189	0.978968	0.916147	0.939528	0.907034	0.920316	0.871806
	0.988406	0.830941	0.905722	1.05589	0.993602	1.20674	1.29656	0.960473	0.863317
	0.891056	0.905853	1.06336	0.986469	0.811473	1.40865	0.960305	0.850247	0.846079
	0.863257	0.883877	1.12055	0.971253	1.22543	1.04885	1.45566	0.786066	0.937331
	0.749397	0.839329	1.07952	0.982393	1.12183	1.33351	1.03896	0.987274	0.836411
	0.838076	0.745304	1.01837	0.966748	0.808463	0.939184	1.02418	0.934784	0.879142
	0.933131	0.874548	0.765664	1.08341	0.863679	1.17744	1.53264	0.956549	0.917753
	0.890343	0.842824	0.99001	0.998016	0.936229	1.37744	1.53153	0.830954	0.749313
	0.903731	0.879989	1.02708	1.15661	0.890622	1.22446	0.943549	0.98132	0.827728
	0.947116	0.839972	0.765551	1.20405	0.864933	1.07326	1.08361	0.852099	0.875236
	1.13968	0.860497	0.98578	0.921961	0.857451	1.43415	0.945744	0.950882	0.829393
	1.03815	0.882711	0.78562	1.01525	0.881951	1.2683	1.13508	0.874642	0.831751
	0.838767	0.785291	1.16651	1.0314	0.890228	0.976915	1.03009	0.887159	1.02608
	0.946087	0.978304	1.07315	1.43192	0.835605	1.17217	1.17754	0.941656	1.01479
	0.830887	0.791455	0.954435	0.901323	0.816074	1.27	0.959419	0.802532	0.8476
	0.733413	0.778697	0.84093	1.16552	0.867287	1.32444	1.29612	0.904274	1.10403
	1.03612	0.801837	1.09083	0.907117	0.769649	1.02994	0.971416	0.961321	0.973206
	1.19555	0.875853	0.728435	0.848272	0.891174	1.46589	0.950016	0.792599	1.00742
	0.813659	0.82194	1.04536	1.13986	0.841613	1.18862	0.954433	0.8206	0.91924
	1.19693	0.749398	0.89654	0.929542	0.695967	1.09948	1.35911	0.932353	0.864927
	0.915583	0.85105	1.03554	0.953936	0.801595	1.41483	0.994107	1.07572	0.780571
	0.966547	0.888652	0.936043	1.07737	0.835854	1.16125	1.30661	0.919493	0.865213
	1.00645	0.819667	0.930485	1.26114	0.810133	1.40044	0.9599	0.871607	0.811141
	0.90465	0.891537	0.753665	0.877471	0.916189	0.974116	1.29144	0.864069	0.90835
	1.01195	0.818507	0.784455	1.13289	0.851701	1.08861	0.935427	0.774057	0.760111
	1.04713	0.80085	0.859931	0.997248	0.758804	0.980102	1.36609	0.864158	0.951362
	1.06582	0.862035	0.841231	0.926289	0.77065	1.01214	1.06667	0.830782	0.964662
	0.914139	0.844973	0.795631	0.894311	0.861638	1.37069	1.13448	0.809566	0.754004
	0.901527	0.74365	1.19036	0.93285	0.714461	1.12764	0.951891	0.771621	0.846654
	0.997125	0.665967	0.862555	1.05097	0.856441	1.04284	1.57522	0.833406	0.828911
	0.74714	0.805499	1.06075	0.864063	0.89146	0.95145	0.938116	1.21745	0.74954
	1.12777	0.766122	0.84383	1.04886	0.705967	1.00657	1.05469	0.766304	0.825906
	0.980648	0.750246	1.00952	0.943968	0.865018	1.39729	0.97513	0.841528	0.806877
	0.865154	0.719251	1.05167	1.08849	0.838595	1.18291	1.08005	0.902525	1.03401
	1.06675	0.858064	0.822075	0.848411	0.902499	1.36071	1.2204	1.01781	0.767582
	0.919177	0.714734	0.85751	1.01068	0.750473	0.979557	1.22106	0.884452	0.863621
	0.934542	0.827162	0.965716	1.07649	0.916777	1.07584	1.07058	0.825448	0.938583
	0.842114	0.816783	0.910611	1.07159	0.861802	1.06811	0.932104	0.830354	0.918943
	1.17458	0.609228	0.895511	0.90281	0.857769	0.984561	0.917931	0.912933	0.810905
	1.17485	0.827654	0.868695	1.20535	0.849809	1.1882	0.913038	0.857416	0.818161
	0.939035	0.826804	0.982356	1.14287	0.846433	1.24794	1.05732	0.901505	0.704089
	0.96884	0.780434	0.888702	1.1864	0.882464	1.19398	0.953362	0.974941	0.878029
	0.932874	0.720641	1.33523	1.00067	0.811732	1.30987	1.07797	0.915972	0.759621
	0.767605	0.810081	1.06441	0.903515	0.697623	1.55205	0.986958	0.750795	1.00384
	0.960764	0.769488	1.0553	1.10283	0.717724	1.21719	1.128	0.747274	0.707269
	1.08657	0.767946	1.43682	0.879484	0.88038	0.838844	1.11307	0.913733	0.753776
	0.854666	0.910122	1.32273	1.12509	0.866641	0.913593	1.0783	0.680313	0.878982
	0.966294	0.944227	0.879713	0.941967	0.712523	1.06974	1.14556	0.879774	0.861263
	0.927994	0.790128	1.04321	0.93849	0.892369	1.21664	1.30631	0.86135	0.802148
	0.953662	0.818482	1.10308	0.944864	0.836061	1.39286	0.960569	0.762972	0.799082
	0.949582	0.719146	0.903017	0.896553	0.822674	1.07541	1.0142	0.671499	0.961234
	0.840327	0.816443	0.872028	0.909388	0.702271	0.900578	1.0117	0.765351	0.957973
	1.08711	0.754693	1.1296	1.05862	0.920869	0.993899	0.943574	0.972945	0.866054
[truncated: 5,315 more rows]

## Sheet: Supplementary Figure 4
Supp. Figure 4A	Age (d)	WT/WT												WT/mUbL
[truncated: 169 more rows]
